# Supplementary material
Source: PubMed Central journal article supplement (PMC3085998)
Supplement: NIHMS287418-supplement-Supp1.pdf [file NIHMS287418-supplement-Supp1.pdf]

### Explanation of data presented in tables S1, S2 and S3

Tables S1, S2 and S3 show the results of the Gene Set Analysis (GSA). GSA was performed according to Efron and Tibshirani (Efron B, Tibshirani R. On testing the significance of sets of genes. *Ann Appl Stat.* 2006;1:107-129). In contrast to single gene analysis, GSA assesses the statistical significance of a group of genes in its entirety. The predefined groups of genes that were investigated with GSA were derived from the Biological process Gene Ontology categories (<http://www.geneontology.org/>). Table S1 shows GSA results for the comparison "severe stress/control"; table S2 presents GSA results for the contrast "mild-stress + morphine/mild-stress"; table S3 lists GSA results for the contrast "severe stress + morphine/mild-stress". The information presented in columns A through G in tables S1, S2 and S3 is as follows:

**Column A** shows the Gene Ontology (<http://www.geneontology.org/>) category number.

**Column B** provides the enrichment score that was calculated using the GSA method. A positive score indicates that the maxmean statistic is larger in absolute value in the experimental group that is in the numerator relative to the group that is in the denominator. For example, Table 1A lists "behavioral fear response" in row 10 with a positive enrichment score. This means that overall the genes in this gene set showed a more prominent up-regulation in the numerator group (severe stress) relative to the denominator group (control). A negative score indicates that the maxmean statistic is larger in absolute value in the experimental group that is in the denominator relative to the group that is in the numerator. For example, Table 1B lists "endosome to lysosome transport" in row 4 with a negative enrichment score. This means that overall the genes in this gene set showed a more prominent down-regulation in the numerator group (severe stress) relative to the denominator group (control).

**Column C** provides the p-value generated with the GSA algorithm. p-values and FDRs are generated with the restandardization method in the GSA algorithm (for detailed explanation see Efron B, Tibshirani R. On testing the significance of sets of genes. *Ann Appl Stat.* 2006;1:107-129). p-values of zero are below the smallest p-value value that can be achieved given 3 biological replicates used in the permutation approach in calculating the null distribution of the enrichment.

**Column D** provides the False Discovery rate (FDR) that was generated with the GSA algorithm. FDR values are generated with the restandardization method in the GSA algorithm (for detailed explanation see Efron B, Tibshirani R. On testing the significance of sets of genes. *Ann Appl Stat.* 2006;1:107-129). FDR values of zero are below the smallest FDR value that can be achieved given 3 biological replicates used in the permutation approach in calculating the null distribution of the enrichment.

**Column E** shows the Gene Set Length, which is the number of genes in the gene set.

**Column F** lists the name of the gene set assigned by the Gene Ontology Consortium (<http://www.geneontology.org/>).

**Column G** lists the gene symbols of all the genes that make up the gene set.

Table S1A. Gene sets up-regulated by severe stress

| Gene Ontology category | Score     | p-value | FDR | Gene set length | Gene_set_description                           | Gene_set_genes                                                                                                                                                                                                                                                                                                                                                                                                                                                                                                                                                                                                                                                                                                                                                                                                                                                                                                                                                                                                                                                                                                                                                                                           |
|------------------------|-----------|---------|-----|-----------------|------------------------------------------------|----------------------------------------------------------------------------------------------------------------------------------------------------------------------------------------------------------------------------------------------------------------------------------------------------------------------------------------------------------------------------------------------------------------------------------------------------------------------------------------------------------------------------------------------------------------------------------------------------------------------------------------------------------------------------------------------------------------------------------------------------------------------------------------------------------------------------------------------------------------------------------------------------------------------------------------------------------------------------------------------------------------------------------------------------------------------------------------------------------------------------------------------------------------------------------------------------------|
| GO:0030036             | 0.1860506 | 0       | 0   | 294             | actin cytoskeleton organization and biogenesis | XIRP1,DIAP1,ARPC3,WASF1,BCL6,SPNB3,NEDD9,PFN1,ARPC2,MYH6,PDE4DIP,NEBL,PTK2B,ELN,SYNGAP1,MYH11,ACTR3B,SPNB2,RHOU,WASF3,RAC3,MYH2,CSR1,LMO7,NF2,PPP1R9B,EPB4.9,CAP2,SPNA2,MYBPC3,FSCN1,FMN2,CAPG,NPHP1,AMOT,DRST,TMOD2,WAS,SSH1,GAS7,CDC42BPB,SHROOM1,ARHGEF10L,ABL2,PDPK1,ASB15,ARHGEF17,FGD3,USH1C,CAPN3,GRID2IP,ABI2,BMP10,NEB,TMSB4X,MYL2,EVL,LIMA1,PDGFB,RHOQ,MET,RHOF,FHOD3,TAPBP,PFN3,PDLIM3,TRIOBP,FGD1,ASZ1,MRAS,GHSR,LCP1,ARHGEF11,ACTC1,LTB,CFL1,CDC42EP2,TTN,NCKAP1,CENTG1,CDC42BPA,BIN3,RAC2,FMN1,NRAP,NISCH,PRKCZ,EPB4.1L1,XIRP2,OBSL1,EPB4.1,NF1,PAFAH1B1,TCAP,TMSB10,PARVA,FHL3,ESPN,SSH2,DYNLL1,TNFAIP1,SSX2IP,CORO1A,EHD2,AVIL,PDGFA,SPNA1,TMOD1,ARPC5,WNT2,CORO2B,NCK2,TPM1,RPL9,TRIP10,LIMK1,EZR,CAPZA3,CDC42EP5,DBN1,RND1,CDC88A,PLS3,FMNL3,LST1,DBNL,FAT1,DIAP3,DIAP2,TSC1,CAV2,ACTR3,SHROOM3,PPP1R9A,VILL,4933400A11RIK,TSC2,FGD5,CNN1,NPHP4,SHROOM2,KRT19,WIPF1,BCAR1,CAP1,CAPZA2,MTSS1,CXCL1,FMNL1,DOCK2,GHRL,AKAP2,DSTN,ARHGAP26,DDR1,CALR,FGD4,FSCN2,DAAM1,PLEK2,ARPC4,ATP6V1G2,SDCBP,KRT8,WDR46,FHOD1,CAPZA1,PRKG1,RHOA,ATP2C1,SPNB1,MYH10,LATS1,B3GALT4,DLCL1,ARHGEF2,CDC42BPG,S100A9,POU5F1,WASL,NUAK2,PLA2G1B,PSDC2,ARPC1B,ARF6,ACTN4,PACSIN2                               |
| GO:0030048             | 0.527958  | 0       | 0   | 29              | actin filament-based movement                  | MYL6B,MYH6,MYO5A,MYH2,MYL1,MYBPC3,WAS,APBB1,APBB2,EVL,ACTC1,MYO1E,MYRIP,MYH4,MYH14,WIPF1,MYL6,MYH10,MYO7A,MYH7,MYLK2,MYL7,WASF2,MYH3,TNNT2,MYO9B,MYH9,MYO6,TNNC1                                                                                                                                                                                                                                                                                                                                                                                                                                                                                                                                                                                                                                                                                                                                                                                                                                                                                                                                                                                                                                         |
| GO:0030029             | 0.205956  | 0       | 0   | 314             | actin filament-based process                   | XIRP1,MYL6B,DIAP1,ARPC3,WASF1,BCL6,SPNB3,NEDD9,PFN1,ARPC2,MYH6,PDE4DIP,NEBL,PTK2B,ELN,SYNGAP1,MYH11,ACTR3B,MYO5A,SPNB2,RHOU,WASF3,RAC3,MYH2,MYL1,CSR1,LMO7,NF2,PPP1R9B,EPB4.9,CAP2,SPNA2,MYBPC3,FSCN1,FMN2,CAPG,NPHP1,AMOT,DST,TMOD2,WAS,SSH1,GAS7,CDC42BPB,SHROOM1,ARHGEF10L,APBB1,ABL2,PDPK1,FLNC,ASB15,ARHGEF17,FGD3,ENAH,USH1C,CAPN3,APBB2,GRID2IP,ABI2,BMP10,NEB,TMSB4X,MYL2,EVL,LIMA1,PDGFB,RHOQ,MET,RHOF,FHOD3,TAPBP,PFN3,PDLIM3,TRIOBP,FGD1,ASZ1,MRAS,GHSR,LCP1,ARHGEF11,ACTC1,LTB,CFL1,CDC42EP2,TTN,NCKAP1,CENTG1,CDC42BPA,BIN3,RAC2,FMN1,NRAP,NISCH,PRKCZ,EPB4.1L1,XIRP2,OBSL1,MYO1E,EPB4.1,NF1,PAFAH1B1,TCAP,ABCC9,TMSB10,PARVA,FHL3,ESPN,SSH2,DYNLL1,MYRIP,TNFAIP1,SSX2IP,MYH4,CORO1A,EHD2,AVIL,PDGFA,SPNA1,MYH14,TMOD1,ARPC5,WNT2,CORO2B,NCK2,TPM1,RPL9,TRIP10,LIMK1,EZR,CAPZA3,CDC42EP5,DBN1,RND1,CCDC88A,PLS3,FMNL3,LST1,DBNL,FAT1,DIAP3,DIAP2,TSC1,CAV2,ACTR3,SHROOM3,PPP1R9A,VILL,4933400A11RIK,TSC2,FGD5,CNN1,NPHP4,SHROOM2,KRT19,WIPF1,BCAR1,CAP1,CAPZA2,MTSS1,CXCL1,FMNL1,DOCK2,GHRL,AKAP2,DSTN,ARHGAP26,DDR1,CALR,FGD4,FSCN2,DAAM1,PLEK2,ARPC4,ATP6V1G2,SDCBP,KRT8,WDR46,FHOD1,MYL6,CAPZA1,PRKG1,RHOA,ATP2C1,SPNB1,MYH10,LATS1,B3GALT4,DLCL1,ARHGEF2,CDC                            |
| GO:0008154             | 0.3868607 | 0       | 0   | 79              | actin polymerization and/or depolymerization   | DIAP1,ARPC3,WASF1,SPNB3,PFN1,ARPC2,ELN,ACTR3B,SPNB2,WASF3,EPB4.9,SPNA2,CAPG,WAS,GAS7,ASB15,ENAH,ABI2,TMSB4X,EVL,LIMA1,MET,TRIOBP,ASZ1,GHSR,CFL1,CDC42EP2,FMN1,TMSB10,CORO1A,AVIL,SPNA1,ARPC5,WNT2,NCK2,TPM1,CAPZA3,CDC42EP5,DBNL,DIAP2,CAV2,ACTR3,VILL,SHROOM2,WIPF1,CAPZA2,MTSS1,GHRL,DSTN,ARPC4,CAPZA1,RHOA,SPNB1,LATS1,WASL,ARPC1B,ARF6,ARPC1A,RAC1,ARPC5L,GSN,VIL1,ANG,NCK1,CAPZB,ARHGAP6,RASA1,CLEC2I,SVIL,CXCL12,CIT,SCIN,MAP3K1,TMOD3,RDX,CTTNBP2,TTLL3,PFN2,DLG1                                                                                                                                                                                                                                                                                                                                                                                                                                                                                                                                                                                                                                                                                                                                 |
| GO:0033275             | 0.8903944 | 0       | 0   | 12              | actin-myosin filament sliding                  | MYL6B,MYH6,MYH2,MYL1,MYBPC3,MYH4,MYL6,MYH7,MYLK2,TNNT2,MYO9B,TNNC1                                                                                                                                                                                                                                                                                                                                                                                                                                                                                                                                                                                                                                                                                                                                                                                                                                                                                                                                                                                                                                                                                                                                       |
| GO:0050851             | 0.2266374 | 0       | 0   | 39              | antigen receptor-mediated signaling pathway    | BCL10,THY1,CBLB,SLA2,FOX3,TRAT1,TRAF6,ZAP70,PTPN6,UBE2N,CACNB3,PTPN22,IGH-6,LYN,LAX1,SPG21,CD3E,MAPK1,PAWR,BCAR1,ELF1,PSEN1,CD79B,CACNB4,LCK,MAP3K7,CD79A,FYN,NFAM1,UBASH3A,SYK,PTPRC,SH2B2,CD19,MALT1,IKBKG,CLEC2I,PSEN2,LAT2                                                                                                                                                                                                                                                                                                                                                                                                                                                                                                                                                                                                                                                                                                                                                                                                                                                                                                                                                                           |
| GO:0031103             | 0.470885  | 0       | 0   | 19              | axon regeneration                              | KLK8,CHL1,RTN4RL1,RTN4RL2,NTRK3,CHST3,APOA1,NEFL,FXR1,MMP2,MIF,CSPG5,BCL2,VCAN,CTNNA1,APOE,JAK2,LAMB2,SLPP1                                                                                                                                                                                                                                                                                                                                                                                                                                                                                                                                                                                                                                                                                                                                                                                                                                                                                                                                                                                                                                                                                              |
| GO:0007409             | 0.3864916 | 0       | 0   | 229             | axonogenesis                                   | KLK8,KALRN,SLIT1,NRCAM,CACNA1A,NRP2,ALS2,L1CAM,SLIT3,UNC5C,PVRL1,CHL1,RELN,RTN4RL1,TIAM1,THY1,SYNGAP1,NGF,ROBO1,LMTK2,SLITRK3,EPHA4,NKX2-9,ARTN,NR2E1,RTN4RL2,NRXN1,DPYSL5,PRKCA,SLIT2,RGNEF,POU4F1,CCK,EPHB2,DCC,ANK3,MYCBP2,VAX2,UNC5A,UNC5B,ULK1,FEZF1,POU4F3,RAB3A,MAPT,NTRK3,ISL2,POU3F2,APBB1,NRP1,DPYSL3,RTN4R,ENAH,CNTN2,APBB2,CHST3,PIP5K1C,KIF5C,ERBB2,SEMA5A,APOA1,DCX,ERBB3,EVL,ULK2,SEMA6C,ETV1,DSCAML1,TOP2B,TGFB2,CDH2,SNAP25,FGF8,KLF7,NRN1,EFNB1,PRRX1,EGR2,LHX4,TTL,CDK5R1,MAPK8IP3,BDNF,BAI1,ATOH1,NTNG2,DKL1,PAR6B,UBB,PAFAH1B1,RTN4,POU4F2,GLI2,ABLIM1,STMN1,ACTB,TNR,IGF1R,GFRA3,NTNG1,STK11,EPHA7,BCL11B,NEFL,SLITRK1,CACNA1F,GDF7,EPHB3,TBR1,FOXG1,NTN2,LIMK1,WNT3A,AMIGO1,LHX3,ROBO2,RYK,NUMB,FEZF2,SEMA3B,RXRA,PTPRZ1,SEMA4F,ETV4,PTPN11,PSEN1,NKX2-1,CXCR4,PTK2,TNN,NDEL1,RUNX3,CELSR3,NRXN3,LMX1A,SLITRK6,CYFIP1,DPYSL2,NEUROG2,BAIAP2,BARHL2,WNT7A,PAR63,NFASC,SLITRK5,MMP2,BOC,MYH10,B3GNT2,MIF,CCKAR,FEZ2,HOXA2,SLITRK2,NTF3,STXBP1,FOXD1,HOXA1,CSPG5,SHH,SEMA4D,RAC1,PAX2,GBX2,PLXNA3,BCL2,VASP,APP,CHRN2,VCAN,BMPR1B,TNFRSF12A,SPON2,NOTCH1,PGRMC1,VAX1,S100B,NEFM,LRRCC4,UCHL1,EFNB3,OTX2,CTNNA1,ARX,CSPG4,CDH4,ACHE,METRN,PLXNB2,NUMBL,CREB1,NTN1,GAP43,SLITRK4,NCAM2 |
| GO:0001662             | 0.8334722 | 0       | 0   | 17              | behavioral fear response                       | NEUROD2,ALS2,GRIN2B,NPY2R,DRD4,CCK,GABRA5,GRM7,GRM2,HCRT,ESR2,VDAC3,BCL2,VDAC1,GRIK2,GNG7,PENK1                                                                                                                                                                                                                                                                                                                                                                                                                                                                                                                                                                                                                                                                                                                                                                                                                                                                                                                                                                                                                                                                                                          |
| GO:0055013             | 1.0995483 | 0       | 0   | 10              | cardiac muscle cell development                | XIRP1,BMP10,MYL2,ATG7,ACTC1,TTN,ATG5,OBSL1,MYH10,MYL6B                                                                                                                                                                                                                                                                                                                                                                                                                                                                                                                                                                                                                                                                                                                                                                                                                                                                                                                                                                                                                                                                                                                                                   |
| GO:0048738             | 0.9575644 | 0       | 0   | 12              | cardiac muscle development                     | MYH6,MYH11,CSR3,PTEN,CXADR,PLN,NKX2-5,ZFPM2,GJC1,MKL2,TBX2,TAZ                                                                                                                                                                                                                                                                                                                                                                                                                                                                                                                                                                                                                                                                                                                                                                                                                                                                                                                                                                                                                                                                                                                                           |

Table S1A. Gene sets up-regulated by severe stress

| Gene Ontology category | Score     | p-value | FDR | Gene set length | Gene_set_description                                  | Gene_set_genes                                                                                                                                                                                                                                                                                                                                                                                                                                                                                                                                                                                                                                                                                                                                                                                                                                                                                                                                                                                                                                                                                                                                                                                                                                                           |
|------------------------|-----------|---------|-----|-----------------|-------------------------------------------------------|--------------------------------------------------------------------------------------------------------------------------------------------------------------------------------------------------------------------------------------------------------------------------------------------------------------------------------------------------------------------------------------------------------------------------------------------------------------------------------------------------------------------------------------------------------------------------------------------------------------------------------------------------------------------------------------------------------------------------------------------------------------------------------------------------------------------------------------------------------------------------------------------------------------------------------------------------------------------------------------------------------------------------------------------------------------------------------------------------------------------------------------------------------------------------------------------------------------------------------------------------------------------------|
| GO:0048469             | 0.2515819 | 0       | 0   | 116             | cell maturation                                       | XIRP1,NEO1,NRCAM,KCNMA1,IHH,DLG4,FZD5,MYH6,PTK2B,MYH11,BTK,FGFR1,MYBPC3,BHLHB8,GM767,ADAM12,EPAS1,GH RHR,CEBPA,LHX6,NTN4,CAPN3,GNAQ,BMP10,NEB,MECP2,MYL2,PEBP1,EPB4.2,GDF11,KCNIP2,KCNH1,INSL3,ACTC1,TTN,CAP N2,OBSL1,CLN5,TCAP,RUNX2,AGPAT6,VSX1,KLF1,GATA2,TMOD1,RXFP2,TSSK3,NTN2L,CDON,RND1,FOXA1,PPARG,FARP2,AK1 ,KRT19,IRX5,RUNX3,CTNNB1,HESS,CBFB,KRT8,IL21,AGRN,PDE3A,CDC25B,MTCH1,KCNE1,MYH10,PTH2R,CACNA1S,EPO,BCL2, APP,ACTG1,CACNA1H,ANG,DYRK1B,MYLPF,TCFCP2L1,DLG2,CSPG4,NEUURL,EREG,RET,MYOZ1,PGR,BCRA2,RP56KA2,PARK2,IT GB1,FOXO3A,GJA1,PTHR1,VEGFA,SOX10,TNNT2,KDR,FBXO5,CALCA,MAEA,SOX8,CAST,PLP1,ERCC2,TIMP1,HES1,ACTA1,DLD,M YH9,CDKN1C,LGI4,POU2F2,CCNB1,PICK1,SCLT1,SEPT4                                                                                                                                                                                                                                                                                                                                                                                                                                                                                                                                                                            |
| GO:0030030             | 0.2588168 | 0       | 0   | 418             | cell projection organization and biogenesis           | KLK8,SIPA1L1,KALRN,SLIT1,JUB,NRCAM,BC060632,CELSR2,CACNA1A,MTAP1B,NRP2,ALS2,L1CAM,SLIT3,UNC5C,TUBB4,PVRL1, CHL1,RELN,PTK2B,RTN4RL1,TLX2,MTAP1S,TIAM1,THY1,SYNGAP1,KNDC1,NGF,ITGA8,ROBO1,LMTK2,MTAP2,SLITRK3,EPHA4,N KX2-9,ARTN,NR2E1,RTN4RL2,NRXN1,DPYSL5,RAC3,PRKCA,SLIT2,RGNEF,GPRIN1,POU4F1,WNT7B,FGFR1,GDNF,CCK,ONECUT1,EPH B2,PPP1R9B,DCC,ANK3,CAPG,PTPRF,MYCBP2,VAX2,UNC5A,UNC5B,GAS7,ULK1,FEZF1,POU4F3,RAB3A,MAPT,ATP2B2,PTEN,NT RK3,ISL2,POU3F2,APBB1,CD24A,NRP1,DPYSL3,RTN4R,FGD3,ENAH,CNTN2,APBB2,CHST3,PIP5K1C,KIF5C,ABI2,ERBB2,SEMA5A, APOA1,MECP2,DCX,ERBB3,EVL,LIMA1,GRIN3A,PDGFB,ULK2,SEMA6C,AKAP4,ETV1,LZTS1,VAV2,DSCAML1,TOP2B,AKT1,LIFR,T GFB2,FGD1,CDH2,SNAP25,APC,FGF8,SPAG16,KLF7,NRN1,ATG7,ONECUT2,CFL1,EFNB1,PRRXL1,CDC42EP2,NCKAP1,YWHAH,EG R2,MT3,NRTN,RAC2,TGFB1,LHX4,TTL,CDK5R1,MAPK8IP3,EFHD1,BDNF,BAI1,KLC3,ATOH1,NTNG2,DCLK1,PAR6B,UBB,FRAP1 ,PAK1,PAFAH1B1,RTN4,SH2B1,CLIC5,POU4F2,ALKBH1,GLI2,ABLIM1,STMN1,KIT,ACTB,RPGRI1L,TNR,IGF1R,GFRA3,PTPRK,COR O1A,NTNG1,STK11,EPHA7,TGFB3,TTC30A1,PDGFA,BCL11B,ITGA6,NEFL,SLITRK1,CACNA1F,NCK2,TSGA10,CD44,ITGB4,GDF7,EP HB3,TTC30B,TBR1,FOXG1,NTN2L,LIMK1,WNT3A,CDC42EP5,DBN1,NEURL,CCDC88A,LST1,AMIGO1,ATP7A,BBS4,LHX3,STX3,TSC                                                                |
| GO:0021846             | 0.6911606 | 0       | 0   | 11              | cell proliferation in forebrain                       | EMX2,POU3F2,ZEB2,POU3F3,FGF8,CCDC100,NCOR2,TACC2,FABP7,TACC1,TACC3                                                                                                                                                                                                                                                                                                                                                                                                                                                                                                                                                                                                                                                                                                                                                                                                                                                                                                                                                                                                                                                                                                                                                                                                       |
| GO:0016337             | 0.2255664 | 0       | 0   | 325             | cell-cell adhesion                                    | PCDH19,PCDH20,NRCAM,CLDN22,BCL10,CELSR2,RGMA,PCDH13,DAB1,CDH26,L1CAM,ICAM1,CLSTN2,UNCX,FAT4,PVRL1,CH L1,HGF,PFN1,CDSN,LGALS7,CYFIP2,RAPGEF1,THY1,ACAN,ITGA8,ROBO1,TNF,THRA,FGF4,DLG5,PCDH19,PCDH88,CADM3,TSTA 3,GATAD2A,PCDH21,CLDN16,LMO7,NF2,PCDH17,COL13A1,NPHP1,PTPRF,B4GALNT2,PCDHA4,AMIGO2,CLDN6,PKD1L1,CLSTN 1,CLDN15,ITGA4,ITGAD,NLGN2,CD24A,TRAF6,ENAH,APOA4,CHAD,OLR1,PVRL3,REG3A,CLDN10,NCAN,CDH12,CLDN14,CTNND 2,CADM2,CDH11,PKHD1,PCDH18,ASTN1,ADA,ZEB2,TCFAP2A,HECTD1,PKP2,DSG1B,NCAM1,DSCAML1,TGFB2,SELPLG,CDH2,P CDHB12,GMDS,PCDH15,CNTN3,NLGN1,COL19A1,NCKAP1,PCDH24,CDH6,CELSR1,CLDN1,DSG4,CDK5R1,CD84,PCDH1,PCDHG A12,CLDN18,PCDH84,DCHS1,OTOR,MUPCDH,COL2A1,AMIGO3,CD209D,CDH15,LAMA3,CADM1,ICAM4,CLSTN3,TGFB3,PCDH B3,JAM2,ITGA6,PCDH16,CDH20,CDH19,CD44,ALX1,PCDH14,JUP,PCDH9,MADCAM1,CDON,LMO4,CLDN2,GPR98,FAT3,AMIG O1,CD34,FAT1,BBS4,TSC1,SNAI1,FAT2,FREM1,SRC,SHROOM3,ROBO2,BARX2,DSC3,ROR2,ZAN,ADAM15,TSC2,ADAM8,CD22,N PHP4,PIK3CB,CLDN9,PDPN,CDH5,PSEN1,TWIST1,PCDH2,CLDN23,GRLF1,CLEC4E,TCAM1,PCDH89,VCAM1,PCDH17,APAF1,PK D1,CDH1,CELSR3,DSC1,CTNNB1,COL8A2,SOX9,DSC2,DSG1A,ITGA5,ITGAM,CLDN8,ICAM5,PCDH8,CTNND1,ITGAL,EMCN,DSG2, CRNN,CLDN20,CLEC7A,DSG3,CERCAM,CD40LG,CLDN7,CLDN3,PARD3,ATP2C1,COBL,PIK3R1,BOC,MYF5,DLC1,COL14A1,CDH18, |
| GO:0030004             | 0.340036  | 0       | 0   | 30              | cellular monovalent inorganic cation homeostasis      | KCNMA1,AQP11,BSND,NR3C2,NEDD4L,ATP1A3,C7,CLCN3,AGTR2,CLN5,TESC,ATP6V0C,CAR2,ATP1A4,CLN6,ATP6V1H,TRP53, LC9A8,ATP1A1,TMPRSS3,SGK1,ATP6V1B2,BCL2,PPT1,MAFG,ATP5B,ATP1A2,CAMK2D,CLN3,AGT                                                                                                                                                                                                                                                                                                                                                                                                                                                                                                                                                                                                                                                                                                                                                                                                                                                                                                                                                                                                                                                                                    |
| GO:0000904             | 0.3466066 | 0       | 0   | 282             | cellular morphogenesis during differentiation         | KLK8,SIPA1L1,KALRN,SLIT1,NRCAM,CELSR2,CACNA1A,NRP2,ALS2,L1CAM,SLIT3,RPGRI1L,UNC5C,PVRL1,CHL1,RELN,RTN4RL1,T LX2,MTAP1S,TIAM1,THY1,SYNGAP1,KNDC1,NGF,ROBO1,LMTK2,ESRRB,SLITRK3,EPHA4,NKX2-9,ARTN,NR2E1,RTN4RL2,NRXN1,DPYSL5,PRKCA,SLIT2,RGNEF,POU4F1,RBP3,CCK,EPHB2,DCC,ANK3,PTPRF,MYCBP2,VAX2,UNC 5A,UNC5B,GAS7,ULK1,CRB1,FEZF1,POU4F3,RAB3A,MAPT,NTRK3,ISL2,POU3F2,APBB1,NRP1,DPYSL3,RTN4R,ENAH,CNTN2,APB B2,CHST3,PIP5K1C,KIF5C,ERBB2,SEMA5A,APOA1,DCX,ERBB3,EVL,ULK2,SEMA6C,ETV1,LZTS1,DSCAML1,TOP2B,LIFR,TGFB2,CD H2,SNAP25,FGF8,KLF7,NRN1,EFNB1,PRRXL1,YWHAH,EGR2,MT3,LHX4,TTL,CDK5R1,MAPK8IP3,BDNF,BAI1,NODAL,ATOH1,NTN G2,DCLK1,PAR6B,UBB,PAFAH1B1,RTN4,POU4F2,GLI2,ABLIM1,STMN1,ACTB,TNR,IGF1R,GFRA3,NTNG1,STK11,EPHA7,BCL11B ,TUG1,NEFL,SLITRK1,CACNA1F,GDF7,EPHB3,TBR1,FOXG1,NTN2L,LIMK1,WNT3A,AMIGO1,ATP7A,BBS4,LHX3,ROBO2,RYK,NUM B,FEZF2,SEMA3B,RORB,RXRA,PTPRZ1,SEMA4F,ETV4,PTPN11,PSEN1,NKX2-1,CXCR4,PTK2,TNN,NDEL1,RUNX3,CELSR3,NRXN3,LMX1A,SLITRK6,CTNNB1,HPRT1,CYFIP1,DMD,DPYSL2,NEUROG2,BAIAP2,KR T8,BARHL2,NR2E3,WNT7A,PARD3,NFASC,SLITRK5,MMP2,BOC,MYH10,B3GNT2,MIF,CCKAR,FEZ2,HOXA2,SLITRK2,NTF3,STXBP 1,FOXD1,DVL1,HOXA1,SGK1,CSPG5,SHH,SEMA4D,RAC1,NTRK2,RPE65,COL18A1,PAX2,GBX2,PLXNA3,BCL2,VASP,APP,CHRN2,                                     |
| GO:0021795             | 0.4386939 | 0       | 0   | 13              | cerebral cortex cell migration                        | DAB1,RELN,POU3F2,LHX6,POU3F3,PAFAH1B1,PSEN1,RAC1,PEX13,ARX,LRP8,PEX5,CDK5                                                                                                                                                                                                                                                                                                                                                                                                                                                                                                                                                                                                                                                                                                                                                                                                                                                                                                                                                                                                                                                                                                                                                                                                |
| GO:0030206             | 0.4362462 | 0       | 0   | 10              | chondroitin sulfate biosynthetic process              | CHSY1,CHST3,CHST12,CHST13,CHST11,CHST7,CHST14,CSGALNACT1,DSE,SLC35D1                                                                                                                                                                                                                                                                                                                                                                                                                                                                                                                                                                                                                                                                                                                                                                                                                                                                                                                                                                                                                                                                                                                                                                                                     |
| GO:0050650             | 0.341358  | 0       | 0   | 13              | chondroitin sulfate proteoglycan biosynthetic process | CHSY1,CYTL1,CHST3,CHST12,CHST13,CHST11,CHST7,CHST14,CSGALNACT2,IGF1,CSGALNACT1,DSE,SLC35D1                                                                                                                                                                                                                                                                                                                                                                                                                                                                                                                                                                                                                                                                                                                                                                                                                                                                                                                                                                                                                                                                                                                                                                               |
| GO:0002367             | 0.619157  | 0       | 0   | 17              | cytokine production during immune response            | BCL10,BCL6,TNF,FOXP3,TRAF6,APOA1,TRAF2,IL10,FCER1G,SASH3,IL21,MAP3K7,NOD2,APOA2,HMOX1,MALT1,DLG1                                                                                                                                                                                                                                                                                                                                                                                                                                                                                                                                                                                                                                                                                                                                                                                                                                                                                                                                                                                                                                                                                                                                                                         |

Table S1A. Gene sets up-regulated by severe stress

| Gene Ontology category | Score     | p-value | FDR | Gene set length | Gene_set_description                            | Gene_set_genes                                                                                                                                                                                                                                                                                                                                                                                                                                                                                                                                                                                                                                                                                                                                                                                                               |
|------------------------|-----------|---------|-----|-----------------|-------------------------------------------------|------------------------------------------------------------------------------------------------------------------------------------------------------------------------------------------------------------------------------------------------------------------------------------------------------------------------------------------------------------------------------------------------------------------------------------------------------------------------------------------------------------------------------------------------------------------------------------------------------------------------------------------------------------------------------------------------------------------------------------------------------------------------------------------------------------------------------|
| GO:0016358             | 0.4670373 | 0       | 0   | 55              | dendrite development                            | SIPA1L1,KALRN,CELSR2,CACNA1A,MTAP1B,TLX2,SYNGAP1,KNDC1,MTAP2,PPP1R9B,PTPRF,NRP1,ABI2,MECP2,DCX,GRIN3A,LZTS1,KLF7,YWHAH,MT3,BDNF,DCLK1,PAK1,CACNA1F,DBN1,LST1,ATP7A,BBS4,FEZF2,GHRL,HPRT1,SCARF1,PRKG1,RHOA,PSCD2,ARF6,DVL1,SGK1,RAC1,NTRK2,APP,CHRN2B,SS18L1,ACHE,BBS1,TRAPPC4,CHAT,CIT,CHRNA3,CDK5,KLHL1,SMAD1,IGSF9,MYO6,MCF2                                                                                                                                                                                                                                                                                                                                                                                                                                                                                              |
| GO:0048813             | 0.7373899 | 0       | 0   | 23              | dendrite morphogenesis                          | SIPA1L1,CELSR2,CACNA1A,TLX2,KNDC1,PTPRF,DCX,LZTS1,KLF7,YWHAH,MT3,DCLK1,CACNA1F,ATP7A,HPRT1,DVL1,SGK1,CHRN2B,ACHE,CIT,CHRNA3,CDK5,SMAD1                                                                                                                                                                                                                                                                                                                                                                                                                                                                                                                                                                                                                                                                                       |
| GO:0021700             | 0.2692413 | 0       | 0   | 138             | developmental maturation                        | XIRP1,NEO1,NRCAM,CACNA1A,KCNMA1,IHH,DLG4,FZD5,MYH6,PTK2B,WNT1,MYH11,MYO5A,BTK,PTGS2,FGFR1,MYBPC3,BHLHB8,GM767,ADAM12,EPAS1,GHRHR,CEBPA,LHX6,NTN4,CAPN3,GNAQ,BMP10,NEB,MECP2,MYL2,SPINK5,PEBP1,EPB4.2,AKT1,TGFB2,GDF11,KCNIP2,KCNH1,INSL3,ACTC1,TTN,DSG4,CAPN2,OBSL1,CLN5,TCAP,RUNX2,AGPAT6,VXS1,KLF1,GATA2,TMOD1,RXFP2,TSSK3,CD44,NTN2L,CDON,RND1,FOXA1,PPARG,BARX2,FARP2,AK1,GRIN1,KRT19,KRTAP16-7,CDH5,IRX5,PSEN1,RUNX3,CTNNB1,HES5,CBFB,KRT8,IL21,AGRN,PDE3A,CDC25B,MTCH1,RECK,KCNE1,MMMP2,MYH10,PTH2R,CACNA1S,RBPJ,EPO,BCL2,APP,ACTG1,CACNA1H,NOTCH1,ANG,DYRK1B,MYLPF,MREG,TCFCP2L1,DLG2,CSPG4,NEURL2,EREG,RET,MYOZ1,PGR,BRCA2,RPS6KA2,PARK2,ITGB1,FOXO3A,GSDMA3,GJA1,PSEN2,PTHR1,VEGFA,PPARD,SOX10,TNNT2,KDR,FBXO5,CALCA,MAEA,SOX8,CAST,PLP1,ERCC2,TIMP1,HES1,ACTA1,DLD,MYH9,CDKN1C,LGI4,POU2F2,CCNB1,PICK1,SCLT1,SEPT4 |
| GO:0001892             | 0.3846954 | 0       | 0   | 20              | embryonic placenta development                  | ESRRB,CEBPB,HAND1,FOXO3,EPAS1,CEBPA,SPINT1,JUNB,NODAL,GATA2,CITED1,PRDM1,SP3,HIF1A,HSF1,MED1,EGLN1,ARNT,CITED2,SP1                                                                                                                                                                                                                                                                                                                                                                                                                                                                                                                                                                                                                                                                                                           |
| GO:0007032             | 0.9282034 | 0       | 0   | 10              | endosome organization and biogenesis            | ALS2,AQP11,VPS18,RAB5B,CLCN3,STX6,RAB22A,ALS2CL,VPS4B,RAB5C                                                                                                                                                                                                                                                                                                                                                                                                                                                                                                                                                                                                                                                                                                                                                                  |
| GO:0048821             | 0.6878335 | 0       | 0   | 14              | erythrocyte development                         | HBA-A2,HBA-A1,BCL6,EPB4.2,ANK1,KLF1,G6PDX,EPO,SOX6,BPGM,MAEA,ERCC2,TIMP1,JMJD6                                                                                                                                                                                                                                                                                                                                                                                                                                                                                                                                                                                                                                                                                                                                               |
| GO:0042596             | 0.7559033 | 0       | 0   | 21              | fear response                                   | NEUROD2,ALS2,GRIN2B,NPY2R,DRD4,ADRB1,CCK,GABRA5,GRM7,BDNF,GRM2,HCRT,DBH,ESR2,VDAC3,ADRA2A,BCL2,VDAC1,GRIK2,GNG7,PENK1                                                                                                                                                                                                                                                                                                                                                                                                                                                                                                                                                                                                                                                                                                        |
| GO:0021885             | 0.5287048 | 0       | 0   | 16              | forebrain cell migration                        | EMX2,DAB1,RELN,POU3F2,LHX6,POU3F3,PAFAH1B1,PSEN1,RAC1,PEX13,ARX,LRP8,PEX5,CDK5,DRD1A,DRD2                                                                                                                                                                                                                                                                                                                                                                                                                                                                                                                                                                                                                                                                                                                                    |
| GO:0015669             | 1.2730313 | 0       | 0   | 14              | gas transport                                   | HBB-B1,HBA-A2,HBA-A1,RPS19,HBA-X,HBB-Y,CYGB,CAR2,HBQ1,KCNK6,F830116E18RIK,MB,NGB,HBB-BH1                                                                                                                                                                                                                                                                                                                                                                                                                                                                                                                                                                                                                                                                                                                                     |
| GO:0006544             | 0.6652032 | 0       | 0   | 13              | glycine metabolic process                       | AGXT,A230051G13RIK,SHMT1,SARDH,BAAT,DMGDH,GLDC,DHFR,GCSH,4930402E16RIK,AMT,PPGS,SHMT2                                                                                                                                                                                                                                                                                                                                                                                                                                                                                                                                                                                                                                                                                                                                        |
| GO:0020027             | 0.8025053 | 0       | 0   | 9               | hemoglobin metabolic process                    | ALAS2,EIF2AK1,EPB4.2,CAT,LYN,EPO,HIF1A,INHA,INHBA                                                                                                                                                                                                                                                                                                                                                                                                                                                                                                                                                                                                                                                                                                                                                                            |
| GO:0002757             | 0.1316487 | 0       | 0   | 54              | immune response-activating signal transduction  | BCL10,THY1,CBLB,SLA2,FOXP3,TRAT1,TRAF6,ZAP70,PTPN6,TICAM1,UBE2N,KLRK1,CACNB3,TLR1,TLR6,PTPN22,IGH-6,FCER1G,LYN,MYD88,LAX1,SPG21,CD3E,MAPK1,PAWR,KLRE1,BCAR1,ELF1,PSEN1,CD79B,CACNB4,LCK,TLR7,CLEC7A,MAP3K7,CD79A,NOD2,TLR4,FYN,NFAM1,UBASH3A,SYK,PTPRC,SH2B2,CD19,MALT1,TLR2,IKBK,TLR3,CLEC2I,UNC93B1,PSEN2,LAT2,TLR9                                                                                                                                                                                                                                                                                                                                                                                                                                                                                                        |
| GO:0008286             | 0.3104239 | 0       | 0   | 46              | insulin receptor signaling pathway              | PIK3R2,SOC57,FOXO1,PRKCA,EIF4EBP1,GRB2,PTPRF,IRS1,PDPK1,GRB14,INS2,AKT1,EIF4EBP2,AP3S1,ZFP106,SOC53,IRS2,PRKCZ,IGF1R,PTPRA,AHSG,IGFBP1,SRC,PTPN1,TSC2,BCAR1,YBX1,SOC51,BAIAP2,PHIP,STXBPA,INSR,PIK3R1,ENPP1,FOXO2,NR1H3,SZH2B,PTPN2,FOXO4,SORBS1,IGF2,SNF1LK2,GAB1,SLC2A8,GRB10,PIK3R3                                                                                                                                                                                                                                                                                                                                                                                                                                                                                                                                       |
| GO:0042226             | 0.5542331 | 0       | 0   | 16              | interleukin-6 biosynthetic process              | BCL10,CARD9,CEBPB,TRAF6,IL17F,GHSR,TLR1,TLR6,IL19,IL1B,GHRL,TLR4,IFNG,EREG,FOXJ1,INPP5D                                                                                                                                                                                                                                                                                                                                                                                                                                                                                                                                                                                                                                                                                                                                      |
| GO:0032635             | 0.4180844 | 0       | 0   | 27              | interleukin-6 production                        | BCL10,TNF,CARD9,CEBPB,FOXP3,TRAF6,IL17F,TICAM1,GHSR,TLR1,TLR6,IL10,FCER1G,IL19,IL1B,GHRL,H47,CHRNA7,UCN,AFAP1L2,NOD2,TLR4,P2RX7,IFNG,EREG,FOXJ1,INPP5D                                                                                                                                                                                                                                                                                                                                                                                                                                                                                                                                                                                                                                                                       |
| GO:0035235             | 0.6976427 | 0       | 0   | 12              | ionotropic glutamate receptor signaling pathway | GRIN2B,CAMK2A,GRIN2A,ATP1A3,GRIN3A,CDK5R1,GRIN3B,GRIN1,FYN,APP,CLN3,GRIK1                                                                                                                                                                                                                                                                                                                                                                                                                                                                                                                                                                                                                                                                                                                                                    |
| GO:0007611             | 0.1417866 | 0       | 0   | 122             | learning and/or memory                          | KLK8,NEUROD2,SHC3,GRIN2B,DLG4,CACNA1C,ATXN1,SYNGAP1,ITGA8,DRD4,PRKCA,GRIN2A,HTT,ATP1A3,EPHB2,GABRA5,TM2OD2,PTEN,PRKAR1B,APBB1,ABI2,DRD5,CTNND2,GRIA1,CACNA1D,GRM7,SNAP25,CHST10,FZD9,EGR2,PRKCZ,BDNF,FOSL2,COMT,ACSL4,NF1,PAFAH1B1,GLUD1,SRF,FOSL1,CRHR1,KIT,PDE4D,RIC8,GLP1R,IL1B,AMPH,JUN,GRIN1,VLDLR,GRM5,PLCB1,GALR2,PSEN1,GHRL,IL1RN,NLGN3,ITGA5,CHRNA7,PCDH8,UCN,AMFR,DBH,RASGRF1,CLN8,FOS,TH,FYN,ADCY8,ESR2,CRHBP,NTAN1,SGK1,KRAS,VDAC3,GM2A,ADAM2,APP,CHRN2B,ITGA3,CASP3,NRAS,GRM4,S100B,GALR3,IGF1,NTF5,EGR1,HMGR,AFF2,VDAC1,PPT1,APOE,SLC6A1,CALB1,IL1RAPL1,PARK2,ATP1A2,HTR2A,ADRA1B,HRH3,ACC2,DRD3,RPS6KB1,PSEN2,LHX8,PTN,GRPR,CRHR,CDK5,PMCH,AAAS,DRD1A,DRD2,BCHE,NOS3,MAN2B1,CLN3,PRKAR2B,FOXP2,IL18,PDE1B                                                                                                     |
| GO:0040011             | 0.5166664 | 0       | 0   | 19              | locomotion                                      | JPH3,CHRM1,MYO5A,GRIN2A,ATP2B2,TTN,SNCA,NEFL,CLN6,GRIN2C,GRM5,PSEN1,GHRL,TSHR,ATP1A2,HTR2C,DRD3,PSEN2,ADORA2A                                                                                                                                                                                                                                                                                                                                                                                                                                                                                                                                                                                                                                                                                                                |

Table S1A. Gene sets up-regulated by severe stress

| Gene Ontology category | Score     | p-value | FDR | Gene set length | Gene_set_description                                                  | Gene_set_genes                                                                                                                                                                                                                                                                                                                                                                                                                                                                                                                                                                                                                                                                                                                                                                                                                                                                                                                                                                                                                                                                                                                                                                      |
|------------------------|-----------|---------|-----|-----------------|-----------------------------------------------------------------------|-------------------------------------------------------------------------------------------------------------------------------------------------------------------------------------------------------------------------------------------------------------------------------------------------------------------------------------------------------------------------------------------------------------------------------------------------------------------------------------------------------------------------------------------------------------------------------------------------------------------------------------------------------------------------------------------------------------------------------------------------------------------------------------------------------------------------------------------------------------------------------------------------------------------------------------------------------------------------------------------------------------------------------------------------------------------------------------------------------------------------------------------------------------------------------------|
| GO:0000165             | 0.1812122 | 0       | 0   | 243             | MAPKKK cascade                                                        | TDGF1,BCL10,CAMKK2,MAP3K9,GRIN2B,MAPKBP1,HGF,ADORA1,PTK2B,SYNGAP1,MAP3K10,DOK2,MAPK8IP2,SH3RF1,ADRA2B,TNF,TAOK3,CARD9,DUSP16,PRKCA,ADRA1A,MAP3K6,PDE6G,FGFR1,GRB2,AXIN1,NF2,DUSP19,MUC20,TNFRSF19,MAP3K5,GADD45B,SHANK3,ADRB3,SPRED2,EPGN,CCM2,BRAP,RAPGEF2,DUSP8,CD24A,TRAF6,FGF13,MAP4K3,NDST1,MINK1,ERBB2,MAP2K2,TRIB1,BRAF,INS2,CASR,DUSP9,MET,PEBP1,FLT1,TRAF2,DUSP6,MADD,PTPN6,OSM,ITGB3,FGF8,C5AR1,MAP2K4,MAPK3,MAPBPIP,ADRA2C,AMBP,NRTN,NGG3,TIMP2,MAPK8IP3,LIF,PPP2R1A,MAPK8IP1,MAP2K6,DOK4,MAPKAPK2,PAK1,NF1,TRP73,IGH-6,SH3BP5,DOK1,MAPK10,MYD88,LAX1,PRDX1,TGFB3,DUSP22,NRG1,PRKAA1,CD74,ITPKB,IL1B,ITGAV,IL6,DUSP10,PROK1,WN-T5A,CDC42EP5,MAPK1,DBNL,MAP4K5,SH2D3C,MAP3K2,AKT2,PDE6H,ROR2,MAP3K3,PIK3CB,MAPK8,MAPK14,LRRN3,MAP3K4,PTPN11,PSEN1,GHRL,GRM1,CXCR4,PTK2,IL3,FGD4,PPM1L,SPRED1,CHRNA7,CDC42SE1,BIRC7,SOD1,HIPK2,CARTPT,CAV3,INSR,RGS3,IRAK4,PTPLAD1,SPRED3,EDA2R,IRAK1,MAP3K7,IL11,TIRAP,NOD2,C1QTNF2,MDFI,FRS2,DOK5,MAP2K3,MAP3K7IP1,NRK,TLR4,PLA2G1B,CAV1,NENF,GNAI2,FCER1A,RB1CC1,SYK,KISS1R,LEP,ARRB1,KISS1,ADRA2A,PRKCD,GADD45G,CRK,P2RX7,IL31RA,TRAF7,ARHGFE6,LRK2,FGF2,CD27,PTPRC,MAP2K5,GRM4,MYLK2,PKN1,TNIK,LEPR,MDFIC,SPAG9,NPHS1,RGS4,CSPG4,DUSP |
| GO:0001578             | 0.944904  | 0       | 0   | 13              | microtubule bundle formation                                          | MARK4,MTAP1B,MTAP1S,MTAP2,NAV1,CLASP1,PSRC1,NEURL,TPPP,GTRGEO22,UBE2B,BBS2,OFD1                                                                                                                                                                                                                                                                                                                                                                                                                                                                                                                                                                                                                                                                                                                                                                                                                                                                                                                                                                                                                                                                                                     |
| GO:0006122             | 0.5327563 | 0       | 0   | 4               | mitochondrial electron transport, ubiquinol to cytochrome c           | 1110020P15RIK,UQCR,UQCRH,UQCRB                                                                                                                                                                                                                                                                                                                                                                                                                                                                                                                                                                                                                                                                                                                                                                                                                                                                                                                                                                                                                                                                                                                                                      |
| GO:0055067             | 0.1448824 | 0       | 0   | 53              | monovalent inorganic cation homeostasis                               | KCNMA1,AQP11,BSND,NR3C2,NEDD4L,ATP1A3,SLC9A3,C7,SLC9A2,SLC9A4,SLC26A9,SLC9A1,CLCN3,SLC4A5,AGTR2,CLN5,TESC,SLC9A7,ATP6V0C,EDN1,CAR2,ATP1A4,CLN6,ATP6V1H,KCNA5,ATP6V0A4,TRP53,NHEDC1,SLC9A8,ATP1A1,SLC4A4,TMPRSS3,SLC9A9,AGTR1A,SGK1,ATP6V1B2,BCL2,SLC9A10,NHEDC2,ATP6V1B1,2010110P09RIK,PPT1,SLC4A10,MAFG,ATP5B,EDNRB,ATP1A2,TMCO3,CAMK2D,CLN3,AGT,SLC9A6,SLC9A5                                                                                                                                                                                                                                                                                                                                                                                                                                                                                                                                                                                                                                                                                                                                                                                                                     |
| GO:0033555             | 0.4997569 | 0       | 0   | 41              | multicellular organismal response to stress                           | NEUROD2,CACNA1A,ALS2,GRIN2B,RELN,NPY2R,DRD4,ADRB1,CCK,KCNIP3,GABRA5,SLC6A2,OSM,GRM7,RUNX1,P2RX3,BDNF,COMT,CRHR1,GRM2,HCRT,DBH,ESR2,VDAC3,ADRA2A,TACR1,GJA4,BCL2,SCN9A,NMUR2,VDAC1,PRL,EDNRB,PPARD,GRIK2,CALCA,GNNG7,PENK1,P2RX2,GRIK1,TAC1                                                                                                                                                                                                                                                                                                                                                                                                                                                                                                                                                                                                                                                                                                                                                                                                                                                                                                                                          |
| GO:0030049             | 1.0353454 | 0       | 0   | 11              | muscle filament sliding                                               | MYL6B,MYH6,MYH2,MYL1,MYBPC3,MYH4,MYL6,MYH7,MYLK2,TNNT2,TNNC1                                                                                                                                                                                                                                                                                                                                                                                                                                                                                                                                                                                                                                                                                                                                                                                                                                                                                                                                                                                                                                                                                                                        |
| GO:0048627             | 0.5044062 | 0       | 0   | 35              | myoblast development                                                  | XIRP1,NEO1,MYH6,MYH11,MYBPC3,ADAM12,CAPN3,BMP10,NEB,MYL2,KCNH1,ACTC1,TTN,CAPN2,OBSL1,TCAP,TMOD1,NTN2L,CDON,KRT19,KRT8,MYH10,CACNA1S,ACTG1,CACNA1H,DYRK1B,MYLFP,NEURL2,MYOZ1,ITGB1,SOX15,TNNT2,CAST,ACTA1,MYH9                                                                                                                                                                                                                                                                                                                                                                                                                                                                                                                                                                                                                                                                                                                                                                                                                                                                                                                                                                       |
| GO:0048628             | 0.5399496 | 0       | 0   | 34              | myoblast maturation                                                   | XIRP1,NEO1,MYH6,MYH11,MYBPC3,ADAM12,CAPN3,BMP10,NEB,MYL2,KCNH1,ACTC1,TTN,CAPN2,OBSL1,TCAP,TMOD1,NTN2L,CDON,KRT19,KRT8,MYH10,CACNA1S,ACTG1,CACNA1H,DYRK1B,MYLFP,NEURL2,MYOZ1,ITGB1,TNNT2,CAST,ACTA1,MYH9                                                                                                                                                                                                                                                                                                                                                                                                                                                                                                                                                                                                                                                                                                                                                                                                                                                                                                                                                                             |
| GO:0030239             | 0.6356277 | 0       | 0   | 23              | myofibril assembly                                                    | XIRP1,MYH6,MYH11,MYBPC3,CAPN3,BMP10,NEB,MYL2,ACTC1,TTN,OBSL1,TCAP,TMOD1,KRT19,KRT8,MYH10,ACTG1,MYLFP,NEURL2,MYOZ1,ITGB1,TNNT2,ACTA1                                                                                                                                                                                                                                                                                                                                                                                                                                                                                                                                                                                                                                                                                                                                                                                                                                                                                                                                                                                                                                                 |
| GO:0051129             | 0.3101756 | 0       | 0   | 113             | negative regulation of cellular component organization and biogenesis | KLK8,SNPH,CLIP2,SPNB3,PFN1,MTAP4,TLX2,THY1,SYNGAP1,MTAP2,SPNB2,EIF4EBP1,MTAP1A,TRIM54,EPB4.9,SPNA2,CAPG,PTPRF,FOX3,ULK1,EIF2AK1,MAPT,PTEN,NRP1,RTN4R,ERCC1,TMSB4X,EVL,LIMA1,ULK2,MET,EIF2AK3,TRIOBP,EIF4EBP2,APC,ASZ1,YWHAH,PACIN1,MT3,CLASP1,RTN4,TMSB10,STMN1,EIF2B3,CORO1A,AVIL,SPNA1,WNT2,TPM1,CAPZA3,DBNL,EIF2B5,CAV2,VILL,SHROOM2,SEMA4F,CAPZA2,HMGB1,TERF2,PSEN1,PAIP2B,PTK2,EIF4EBP3,PACIN3,EIF2B4,CLASP2,CAPZA1,SPNB1,DLC1,KATNB1,ARHGFE2,SET,ARF6,PACIN2,SGK1,RAC1,PLXNA3,GSN,VIL1,HDAC6,CAPZB,S1PR1,CSPG4,BRCA1,ERCC4,MAP6D1,RECL4,EIF2B1,NTN1,CENTD2,TERF2IP,TGFB1,MSX3,PAX5,CDC42,SVIL,MBP,RUFY3,CIT,MAPRE1,SCIN,SEMA3F,MAP3K1,TMOD3,RDX,CTTNBP2,RNF6,ESPL1,SEMA3A,PAIP2,MID1IP1,SPP1,MID1                                                                                                                                                                                                                                                                                                                                                                                                                                                                             |
| GO:0051494             | 0.3320891 | 0       | 0   | 57              | negative regulation of cytoskeleton organization and biogenesis       | CLIP2,SPNB3,PFN1,MTAP4,MTAP2,SPNB2,MTAP1A,TRIM54,EPB4.9,SPNA2,CAPG,MAPT,TMSB4X,EVL,LIMA1,MET,TRIOBP,APC,ASZ1,CLASP1,TMSB10,STMN1,CORO1A,AVIL,SPNA1,WNT2,TPM1,CAPZA3,DBNL,CAV2,VILL,SHROOM2,CAPZA2,CLASP2,CAPZA1,SPNB1,DLC1,KATNB1,ARHGFE2,SGK1,GSN,VIL1,HDAC6,CAPZB,S1PR1,BRCA1,MAP6D1,CENTD2,SVIL,MAPRE1,SCIN,MAP3K1,TMOD3,RDX,CTTNBP2,MID1IP1,MID1                                                                                                                                                                                                                                                                                                                                                                                                                                                                                                                                                                                                                                                                                                                                                                                                                                |
| GO:0045822             | 0.7333122 | 0       | 0   | 13              | negative regulation of heart contraction                              | ADORA1,ADRA1D,PRKCA,ADRA1A,NOS1,PLN,AGTR2,ADRBK1,ATP1A1,ATP2A2,IL2,ATP1A2,JAK2                                                                                                                                                                                                                                                                                                                                                                                                                                                                                                                                                                                                                                                                                                                                                                                                                                                                                                                                                                                                                                                                                                      |
| GO:0046580             | 0.6297561 | 0       | 0   | 10              | negative regulation of Ras protein signal transduction                | BCL6,TNK1,PPP2CB,TIMP2,MFN2,NF1,CENTD3,NUP62,DLC1,STMN3                                                                                                                                                                                                                                                                                                                                                                                                                                                                                                                                                                                                                                                                                                                                                                                                                                                                                                                                                                                                                                                                                                                             |
| GO:0048011             | 0.4402595 | 0       | 0   | 15              | nerve growth factor receptor signaling pathway                        | SOS1,LMTK2,PTPRF,ULK1,SORT1,AGTR2,MAGEH1,SR,BCAR1,PTPN11,BEX1,NDN,RAF1,UTP11L,AGT                                                                                                                                                                                                                                                                                                                                                                                                                                                                                                                                                                                                                                                                                                                                                                                                                                                                                                                                                                                                                                                                                                   |

Table S1A. Gene sets up-regulated by severe stress

| Gene Ontology category | Score     | p-value | FDR | Gene set length | Gene_set_description                | Gene_set_genes                                                                                                                                                                                                                                                                                                                                                                                                                                                                                                                                                                                                                                                                                                                                                                                                                                                                                                                                                                                                                                                                                                                                                                                                                                                                   |
|------------------------|-----------|---------|-----|-----------------|-------------------------------------|----------------------------------------------------------------------------------------------------------------------------------------------------------------------------------------------------------------------------------------------------------------------------------------------------------------------------------------------------------------------------------------------------------------------------------------------------------------------------------------------------------------------------------------------------------------------------------------------------------------------------------------------------------------------------------------------------------------------------------------------------------------------------------------------------------------------------------------------------------------------------------------------------------------------------------------------------------------------------------------------------------------------------------------------------------------------------------------------------------------------------------------------------------------------------------------------------------------------------------------------------------------------------------|
| GO:0031175             | 0.3793518 | 0       | 0   | 308             | neurite development                 | KLK8,SIPA1L1,KALRN,SLIT1,NRCAM,CELSR2,CACNA1A,MTAP1B,NRP2,ALS2,L1CAM,SLIT3,UNC5C,PVRL1,CHL1,RELN,PTK2B,RTN4RL1,TLX2,MTAP1S,TIAM1,THY1,SYNGAP1,KNDC1,NGF,ROBO1,LMTK2,MTAP2,SLITRK3,EPHA4,NKX2-9,ARTN,NR2E1,RTN4RL2,NRXN1,DPYSL5,RAC3,PRKCA,SLIT2,RGNEF,GPRIN1,POU4F1,WNT7B,FGFR1,GDNF,CCK,EPHB2,PPP1R9B,DCC,ANK3,PTPRF,MYCBP2,VAX2,UNC5A,UNC5B,GAS7,ULK1,FEZF1,POU4F3,RAB3A,MAPT,PTEN,NTRK3,ISL2,POU3F2,APBB1,CD24A,NRP1,DPYSL3,RTN4R,ENAH,CNTN2,APBB2,CHST3,PIP5K1C,KIF5C,ABI2,ERBB2,SEMA5A,APOA1,MECP2,DCX,ERBB3,EVL,GRIN3A,ULK2,SEMA6C,ETV1,LZTS1,DSCAML1,TOP2B,LIFR,TGFB2,CDH2,SNAP25,APC,FGF8,KLF7,NRN1,ATG7,EFNB1,PRRXL1,YWHAH,EGR2,MT3,NRTN,LHX4,TTL,CDK5R1,MAPK8IP3,EFHD1,BDNF,BAI1,ATOH1,NTNG2,DCLK1,PAR6B,UBB,PAK1,PAFAH1B1,RTN4,POU4F2,ALKBH1,GLI2,ABLIM1,STMN1,ACTB,TNR,IGF1R,GFRA3,PTPRK,NTNG1,STK11,EPHA7,BCL11B,NEFL,SLITRK1,CACNA1F,CD44,GDF7,EPHB3,TBR1,FOXG1,NTN2L,LIMK1,WNT3A,DBN1,LST1,AMIGO1,ATP7A,BBS4,LHX3,STX3,LINGO1,PPP1R9A,ROBO2,RYK,NUMB,FEZF2,SEMA3B,MAPK8,RXRA,GALR2,PTPRZ1,SEMA4F,ETV4,PTPN11,PSEN1,GHRL,NKX2-1,CXCR4,PTK2,TNN,NDEL1,RUNX3,CDH1,CELSR3,NRXN3,LMX1A,SLITRK6,HPRT1,UCN,CYFIP1,DMD,DPYSL2,NEUROG2,BAIAP2,RASGRF1,SCARF1,BARHL2,WNT7A,PRKG1,RHOA,PAR3,NFASC,SLITRK5,MMP2,BOC,MYH10,B3GNT2,MIF,CKAR,FEZZ,HOXA2,                         |
| GO:0048812             | 0.396422  | 0       | 0   | 255             | neurite morphogenesis               | KLK8,SIPA1L1,KALRN,SLIT1,NRCAM,CELSR2,CACNA1A,NRP2,ALS2,L1CAM,SLIT3,UNC5C,PVRL1,CHL1,RELN,RTN4RL1,TLX2,MTAP1S,TIAM1,THY1,SYNGAP1,KNDC1,NGF,ROBO1,LMTK2,SLITRK3,EPHA4,NKX2-9,ARTN,NR2E1,RTN4RL2,NRXN1,DPYSL5,PRKCA,SLIT2,RGNEF,POU4F1,CCK,EPHB2,DCC,ANK3,PTPRF,MYCBP2,VAX2,UNC5A,UNC5B,GAS7,ULK1,FEZF1,POU4F3,RAB3A,MAPT,NTRK3,ISL2,POU3F2,APBB1,NRP1,DPYSL3,RTN4R,ENAH,CNTN2,APBB2,CHST3,PIP5K1C,KIF5C,ERBB2,SEMA5A,APOA1,DCX,ERBB3,EVL,ULK2,SEMA6C,ETV1,LZTS1,DSCAML1,TOP2B,LIFR,TGFB2,CDH2,SNAP25,FGF8,KLF7,NRN1,EFNB1,PRRXL1,YWHAH,EGR2,MT3,LHX4,TTL,CDK5R1,MAPK8IP3,BDNF,BAI1,ATOH1,NTNG2,DCLK1,PAR6B,UBB,PAFAH1B1,RTN4,POU4F2,GLI2,ABLIM1,STMN1,ACTB,TNR,IGF1R,GFRA3,NTNG1,STK11,EPHA7,BCL11B,NEFL,SLITRK1,CACNA1F,GDF7,EPHB3,TBR1,FOXG1,NTN2L,LIMK1,WNT3A,AMIGO1,ATP7A,LHX3,ROBO2,RYK,NUMB,FEZF2,SEMA3B,RXRA,PTPRZ1,SEMA4F,ETV4,PTPN11,PSEN1,NKX2-1,CXCR4,PTK2,TNN,NDEL1,RUNX3,CELSR3,NRXN3,LMX1A,SLITRK6,HPRT1,CYFIP1,DMD,DPYSL2,NEUROG2,BAIAP2,BARHL2,WNT7A,PAR3,NFASC,SLITRK5,MMP2,BOC,MYH10,B3GNT2,MIF,CKAR,FEZZ,HOXA2,SLITRK2,NTF3,STXBP1,FOXD1,DVL1,HOXA1,SGK1,CSPG5,SHH,SEMA4D,RAC1,PAX2,GBX2,PLXNA3,BCL2,VASP,APP,CHRN2,VCAN,BMPR1B,TNFRSF12A,SPON2,NOTCH1,PCACNA1A,CHRM1,EGR3,KIF1B,CHRNA1,RAB3A,CD24A,P2RX3,CHRN4,NTF3,CHRN2,MYLK2,CHAT,DTNA,SLC5A7,CHRNA3,P2RX2 |
| GO:0007274             | 0.6413776 | 0       | 0   | 17              | neuromuscular synaptic transmission |                                                                                                                                                                                                                                                                                                                                                                                                                                                                                                                                                                                                                                                                                                                                                                                                                                                                                                                                                                                                                                                                                                                                                                                                                                                                                  |
| GO:0048666             | 0.3671944 | 0       | 0   | 352             | neuron development                  | KLK8,SIPA1L1,KALRN,SLIT1,NRCAM,CELSR2,NEUROD2,CACNA1A,MTAP1B,NRP2,ALS2,L1CAM,SLIT3,UNC5C,CRMP1,DLG4,PVRL1,CHL1,RELN,PTK2B,RTN4RL1,TLX2,MTAP1S,TIAM1,THY1,SYNGAP1,KNDC1,NGF,NEUROD4,ROBO1,LMTK2,MTAP2,SLITRK3,EPHA4,NKX2-9,ARTN,NR2E1,RTN4RL2,NRXN1,DPYSL5,RAC3,PRKCA,SLIT2,RGNEF,DGKG,GPRIN1,POU4F1,WNT7B,HTT,FGFR1,GDNF,CCK,EPHB2,PPP1R9B,DCC,ANK3,PTPRF,MYCBP2,VAX2,UNC5A,UNC5B,GAS7,ULK1,NR2F6,FEZF1,POU4F3,RAB3A,MAPT,PTEN,NTRK3,ISL2,POU3F2,APBB1,CD24A,NRP1,DPYSL3,RTN4R,LHX6,ENAH,NTN4,CNTN2,APBB2,CHST3,PIP5K1C,KIF5C,GNAQ,ABI2,ERBB2,SEMA5A,APOA1,MECP2,DCX,ERBB3,EVL,GRIN3A,ULK2,SEMA6C,ETV1,LZTS1,DSCAML1,TOP2B,LIFR,TGFB2,CDH2,SNAP25,APC,FGF8,KLF7,NRN1,KCNIP2,ATG7,ONECUT2,EFNB1,PRRXL1,RUNX1,YWHAH,EGR2,MT3,NRTN,LHX4,TTL,CDK5R1,MAPK8IP3,LIF,EFHD1,BDNF,EN2,BAI1,ATOH1,NTNG2,DCLK1,PAR6B,UBB,PAK1,CLN5,PAFAH1B1,TRP73,RTN4,POU4F2,ALKBH1,GLI2,ABLIM1,STMN1,ACTB,TNR,VSX1,IGF1R,GFRA3,PTPRK,NTNG1,STK11,EPHA7,BCL11B,ASCL1,NEFL,SLITRK1,CACNA1F,CD44,GDF7,EPHB3,TBR1,FOXG1,NTN2L,LIMK1,WNT3A,DBN1,RND1,LST1,AMIGO1,ATP7A,BBS4,LHX3,STX3,LINGO1,PPP1R9A,ROBO2,FARP2,AK1,RYK,NUMB,FEZF2,SEMA3B,MAPK8,RXRA,GALR2,PTPRZ1,SEMA4F,ETV4,IRX5,PTPN11,PSEN1,GHRL,NKX2-1,CXCR4,PTK2,EN1,TNN,                                                                                |
| GO:0030182             | 0.3249119 | 0       | 0   | 469             | neuron differentiation              | KLK8,EMX2,SIPA1L1,KALRN,SLIT1,NRCAM,CELSR2,NEUROD2,CACNA1A,MTAP1B,NRP2,ALS2,L1CAM,SOCS2,SLIT3,PTPRU,UNC5C,CRMP1,DLG4,PVRL1,CHL1,RELN,PTK2B,WNT1,RTN4RL1,TLX2,YWHAH,MTAP1S,TIAM1,THY1,SYNGAP1,KNDC1,NGF,NEUROD4,ROBO1,LMTK2,MTAP2,NEUROG1,SLITRK3,EPHA4,NKX2-9,ARTN,NR2E1,RTN4RL2,MDGA1,NRXN1,DPYSL5,RAC3,PRKCA,SLIT2,GPC2,RGNEF,DGKG,GPRIN1,CCND2,PTF1A,POU4F1,CEBPB,BHLHB5,WNT7B,HTT,EFNA3,BRSK1,FGFR1,GDNF,LHX2,CCK,EPHB2,PPP1R9B,DCC,ATN1,ANK3,PTPRF,MYCBP2,VAX2,NEUROD1,HOXC10,UNC5A,UNC5B,GAS7,ULK1,NR2F6,FEZF1,POU4F3,RAB3A,MAPT,ATP2B2,PTEN,NTRK3,ISL2,POU3F2,EMX1,APBB1,CD24A,NRP1,DPYSL3,TUBB3,RTN4R,LHX6,ENAH,NTN4,CNTN2,MNX1,APBB2,CHST3,PIP5K1C,KIF5C,GNAQ,ABI2,ERBB2,SEMA5A,APOA1,MECP2,DCX,ERBB3,EVL,GRIN3A,ULK2,SEMA6C,PHOX2B,ETV1,DBX1,MIB1,LZTS1,DSCAML1,CHRD1,PSD,TOP2B,LIFR,TGFB2,CDH2,SNAP25,APC,FGF8,KLF7,NRN1,KCNIP2,NKX6-2,PTPRR,ATG7,FOXA2,TUBB2A,NLGN1,ONECUT2,EFNB1,PRRXL1,RUNX1,HOXD3,YWHAH,EDN3,EGR2,MT3,NRTN,HELT,TGFBR1,LHX4,TIMP2,TTL,CDK5R1,TLX3,MAPK8IP3,LIF,EFHD1,BDNF,EN2,BAI1,NAPA,ATOH1,NTNG2,DCLK1,AGTR2,PAR6B,TUBB2B,UBB,PAK1,GSX2,CLN5,PAFAH1B1,TRP73,BAG1,ASPM,RTN4,POU4F2,ALKBH1,GLI2,ABLIM1,STMN1,ACTB,TNR,VSX1,IGF1R,GFRA3,PHOX2A,PTPRK,NTNG1,DNMT3B,STK11,EPHA7,BCL11B,GATA2,NR4A2,NRG1,EVX1,ASCL1,NEFL,SLITRK1,CACNA1F,CD44,RTN    |

Table S1A. Gene sets up-regulated by severe stress

| Gene Ontology category | Score     | p-value | FDR | Gene set length | Gene_set_description                                           | Gene_set_genes                                                                                                                                                                                                                                                                                                                                                                                                                                                                                                                                                                                                                                                                                                                                                                                                                                                                                                                                                                                                                                                                                                                                                              |
|------------------------|-----------|---------|-----|-----------------|----------------------------------------------------------------|-----------------------------------------------------------------------------------------------------------------------------------------------------------------------------------------------------------------------------------------------------------------------------------------------------------------------------------------------------------------------------------------------------------------------------------------------------------------------------------------------------------------------------------------------------------------------------------------------------------------------------------------------------------------------------------------------------------------------------------------------------------------------------------------------------------------------------------------------------------------------------------------------------------------------------------------------------------------------------------------------------------------------------------------------------------------------------------------------------------------------------------------------------------------------------|
| GO:0007269             | 0.3515686 | 0       | 0   | 114             | neurotransmitter secretion                                     | SNPH,CACNA1A,PCLO,PPFIA3,SPNB3,GRIN2B,STX1A,ADORA1,CPLX2,SEPT5,NGF,CAMK2A,NPY2R,DRD4,UNC13A,NRXN1,VAMP2,RIMS1,CACNA1B,BTK,PRKCB1,SYN1,SYN2,SYN3,APBA1,RAB3A,NRXN2,LIN7C,GRM7,SNAP25,APBA2,NLGN1,CELSR1,EDN3,NISCH,LPHN1,CPLX1,BDNF,DOC2A,ERC2,GRIK5,SYT1,NF1,SNCA,RAB3C,RAB15,NSF,STX7,GRM2,LIN7A,ADRBK1,CACNA1F,IL1B,KCNMB4,STX3,HCRT,PSEN1,LIN7B,CACNB4,IL1RN,NRXN3,CHRNA7,TRIM9,CHRNA4,CARTPT,WNT7A,PINK1,SYT3,YWHAZ,SYT4,CADPS,AP3M2,DVL1,RIMS4,NTRK2,CHRNA2,GRM4,ADORA3,RAB14,TRH,PPT1,CPLX4,PDYN,PARK2,HTR2A,NOS1AP,SYT2,CHRNA6,HRH3,HTR2C,CHRNA4,DRD3,RAB26,SYT12,CHRNA3,STX4A,NPY5R,UNC13B,GIPIC1,CPLX3,SNAPIN,UNC13C,BAIAP3,PLDN,DRD2,SNCAIP,AGT,HTR1B,GRM8,ICA1,MYO6,STXBP2,ADORA2A,GRIK1                                                                                                                                                                                                                                                                                                                                                                                                                                                                         |
| GO:0015671             | 1.2496593 | 0       | 0   | 12              | oxygen transport                                               | HBB-B1,HBA-A2,HBA-A1,HBA-X,HBB-Y,CYGB,HBO1,KCNK6,F830116E18RIK,MB,NGB,HBB-BH1                                                                                                                                                                                                                                                                                                                                                                                                                                                                                                                                                                                                                                                                                                                                                                                                                                                                                                                                                                                                                                                                                               |
| GO:0048008             | 0.3831692 | 0       | 0   | 14              | platelet-derived growth factor receptor signaling pathway      | PLAT,RAPGEF1,PTEN,PDGFB,PDAP1,PDGFA,BCR,SRC,BCAR1,PDGFRA,JAK2,VEGFA,PDGFRB,PDGFC                                                                                                                                                                                                                                                                                                                                                                                                                                                                                                                                                                                                                                                                                                                                                                                                                                                                                                                                                                                                                                                                                            |
| GO:0001956             | 0.4782583 | 0       | 0   | 13              | positive regulation of neurotransmitter secretion              | GRIN2B,STX1A,NPY2R,CACNA1B,SNCA,ADRBK1,CARTPT,PINK1,CHRNA2,TRH,HTR2C,ADORA2A,GRIK1                                                                                                                                                                                                                                                                                                                                                                                                                                                                                                                                                                                                                                                                                                                                                                                                                                                                                                                                                                                                                                                                                          |
| GO:0051092             | 0.1897712 | 0       | 0   | 35              | positive regulation of NF-kappaB transcription factor activity | BCL10,ICAM1,CAMK2A,TNF,CARD9,CARD11,CAT,TICAM1,UBE2N,IKKBK,AMH,MYD88,IRAK2,EDA2R,NPM1,NOD2,TLR4,PLA2G1B,UBE2V1,KRAS,ITGB2,MALTI1,IKKBK,TLR3,RELA,TGFB1,MAP3K13,EDA,NLRC3,PRDX3,AGT,PRKCO,RIPK2                                                                                                                                                                                                                                                                                                                                                                                                                                                                                                                                                                                                                                                                                                                                                                                                                                                                                                                                                                              |
| GO:0016540             | 0.1890862 | 0       | 0   | 92              | protein autoprocessing                                         | CAMKK2,MAP3K9,MEX3B,MAP3K10,CAMK2A,LMTK2,TNK1,TAOK3,BTK,MOBK1A,ULK1,PCSK2,EIF2AK1,NTRK3,UHMK1,ZAP70,DYRK1A,ERBB2,FERT2,MET,EIF2AK3,AKT1,ASZ1,CRKRS,CAMK2B,TTN,TGFBR1,CAPN2,PAK1,VRK2,LYN,KIT,HK1,IGF1R,PIM3,BCR,WNT2,MYO3A,TAF1,CDKL5,CLK6,CAV2,IRAK2,JUN,MAP3K3,MAPK14,HATATIP2,PCSK9,PTK2,VEGFC,LCK,CAPN1,INSR,NLK,IRAK1,PAK2,PARP1,FYN,ENPP1,PDGFRA,SYK,PRKCD,NTRK2,LRRK2,PHKA1,PTPRC,PRKACA,ERN1,MAP3K12,CFTFR,JAK2,MAP3K13,GRK1,MAP3K11,EIF2AK2,STK4,KDR,TRPM7,CAMK2D,MAP3K1,CLK3,EGFR,CTTNBP2,PDGFRB,CDK5,YES1,CAMK2G,MAPK15,CLK2,CLK4,CLK1,VRK1                                                                                                                                                                                                                                                                                                                                                                                                                                                                                                                                                                                                                      |
| GO:0007265             | 0.1504347 | 0       | 0   | 293             | Ras protein signal transduction                                | KALRN,GIT1,PLEKHG5,ALS2,IQSEC2,BCL6,SOS1,SHC3,CENTG3,SYDE1,PTK2B,TIAM1,SYNGAP1,ARHGFE10,NGF,DOK2,ARHGDI,GRIT,D10BWG1379E,TNK1,RHOU,IQSEC3,RGNEF,TRIO,ARHGFE5,GRB2,TBC1D16,TBC1D14,TBC1D10C,DEPDC2,CENTB5,FARP1,ARFGEF2,ULK1,ARHGFE12,DOK3,ARHGFE10L,TBC1D10A,ARHGAP20,BRAP,ARHGFE17,FGD3,APOC3,KSR1,ERBB2,RASGRP4,APOA1,IQSEC1,CENTG2,RALGDS,HRAS1,ABR,MAP2K2,ITSN2,SOS2,TBC1D9,ECT2,SHOC2,TBC1D10B,VAV2,D10ERTD610E,RASGRP1,TBC1D5,GBF1,PSCD3,PSD,ARHGFE4,FGD1,CDH2,PSD4,PPP2CB,ARHGAP4,MRAS,RABGAP1L,ARHGFE11,ADPRHL1,MAPK3,CFL1,G3BP1,TTN,SGSM2,CENTG1,RHOB,EVI5L,TIMP2,NISCH,PSCD1,KITL,NET1,MAPK13,TBC1D20,VAV1,RASSF1,MFN2,MAPKAPK2,RASGRF2,PSD3,NF1,PAFAH1B1,TBC1D9B,GNA12,TBC1D24,NTRK1,DOK1,ITSN1,TBC1D30,CENTD3,CENTD1,YWHAB,NRG1,BCR,TBC1D2,RALA,ITPKB,RRAS2,LIMK1,CDC42EP5,MAPK1,DBNL,SMAP1,RHOD,TBC1D13,TSC1,CENTA1,SRC,TIAM2,A630047E20RIK,MAPKAPK3,BC067047,FARP2,TBC1D22B,TBC1D8B,CDC42EP4,FGD5,MAPK14,CNKSR1,PTH,EPS8L2,VAV3,ARHGFE16,ARHGAP1,DOCK2,PLEKHG4,SGSM1,LCK,FGD4,ARHGFE7,DDEF1,TBC1D22A,ARFGEF1,TBC1D21,GNB1,USP36,SDCBP,NUP62,BAIAP2,RASGRF1,SMAP2,PTPLAD1,RHOA,RALB,PLD1,TBC1D15,PLEKHG3,DLG1,ARHGFE2,CENTB1,SYDE2,G3BP2,TBC1D25,CSF1,PSCD2,AR |
| GO:0032956             | 0.2615131 | 0       | 0   | 75              | regulation of actin cytoskeleton organization and biogenesis   | ARPC3,SPNB3,PFN1,ARPC2,NEBL,ELN,ACTR3B,SPNB2,NF2,EPB4.9,SPNA2,CAPG,ARHGFE10L,NEB,TMSB4X,EVL,LIMA1,MET,TRIOBP,ASZ1,CFL1,CDC42EP2,FMN1,TMSB10,CORO1A,AVIL,SPNA1,ARPC5,WNT2,NCK2,TPM1,CAPZA3,CDC42EP5,CCDC88A,DBNL,TSC1,CAV2,ACTR3,VILL,TSC2,SHROOM2,CAPZA2,DSTN,CAPZA1,RHOA,SPNB1,LATS1,DLG1,ARPC1B,ARF6,ARPC1A,KISS1R,RAC1,ARPC5L,GSN,VIL1,NCK1,CAPZB,S1PR1,SORBS3,CENTD2,RASA1,CLEC2I,SVIL,CXCL12,CIT,SCIN,MAP3K1,TMOD3,RDX,C                                                                                                                                                                                                                                                                                                                                                                                                                                                                                                                                                                                                                                                                                                                                               |
| GO:0030832             | 0.3250426 | 0       | 0   | 63              | regulation of actin filament length                            | ARPC3,SPNB3,PFN1,ARPC2,NEBL,ELN,ACTR3B,SPNB2,EPB4.9,SPNA2,CAPG,NEB,TMSB4X,EVL,LIMA1,MET,TRIOBP,ASZ1,CFL1,CDC42EP2,FMN1,TMSB10,CORO1A,AVIL,SPNA1,ARPC5,WNT2,NCK2,TPM1,CAPZA3,CDC42EP5,DBNL,CAV2,ACTR3,VILL,SHROOM2,CAPZA2,DSTN,CAPZA1,RHOA,SPNB1,LATS1,ARPC1B,ARF6,ARPC1A,RAC1,ARPC5L,GSN,VIL1,NCK1,CAPZB,RASA1,CLEC2I,SVIL,CXCL12,CIT,SCIN,MAP3K1,TMOD3,RDX,CTTNBP2,PFN2,DLG1                                                                                                                                                                                                                                                                                                                                                                                                                                                                                                                                                                                                                                                                                                                                                                                               |
| GO:0030833             | 0.3145465 | 0       | 0   | 26              | regulation of actin filament polymerization                    | ARPC3,PFN1,ARPC2,ELN,ACTR3B,TMSB4X,CDC42EP2,FMN1,TMSB10,ARPC5,NCK2,CDC42EP5,ACTR3,RHOA,LATS1,ARPC1B,ARF6,ARPC1A,RAC1,ARPC5L,NCK1,RASA1,CLEC2I,MAP3K1,PFN2,DLG1                                                                                                                                                                                                                                                                                                                                                                                                                                                                                                                                                                                                                                                                                                                                                                                                                                                                                                                                                                                                              |
| GO:0032970             | 0.2553534 | 0       | 0   | 78              | regulation of actin filament-based process                     | ARPC3,SPNB3,PFN1,ARPC2,NEBL,ELN,ACTR3B,SPNB2,NF2,EPB4.9,SPNA2,MYBPC3,CAPG,ARHGFE10L,NEB,TMSB4X,EVL,LIMA1,MET,TRIOBP,ASZ1,CFL1,CDC42EP2,FMN1,TMSB10,CORO1A,AVIL,PDGFA,SPNA1,ARPC5,WNT2,NCK2,TPM1,CAPZA3,CDC42EP5,CCDC88A,DBNL,TSC1,CAV2,ACTR3,VILL,TSC2,SHROOM2,CAPZA2,DSTN,CAPZA1,RHOA,SPNB1,LATS1,DLG1,ARPC1B,ARF6,ARPC1A,KISS1R,RAC1,ARPC5L,GSN,VIL1,NCK1,MYLK2,CAPZB,S1PR1,SORBS3,CENTD2,RASA1,CLEC2I,SVIL,CXCL12,CIT,SCIN,MAP3K1,TMOD3,RDX,CTTNBP2,PFN2,DLG1,PRKCO,TNCC1                                                                                                                                                                                                                                                                                                                                                                                                                                                                                                                                                                                                                                                                                                |

Table S1A. Gene sets up-regulated by severe stress

| Gene Ontology category | Score     | p-value | FDR | Gene set length | Gene_set_description                                          | Gene_set_genes                                                                                                                                                                                                                                                                                                                                                                                                                                                                                                                                                                                                                                                                                                                                                                                                                                                                                                                                                                                                                                                                                                                                                                                                                                               |
|------------------------|-----------|---------|-----|-----------------|---------------------------------------------------------------|--------------------------------------------------------------------------------------------------------------------------------------------------------------------------------------------------------------------------------------------------------------------------------------------------------------------------------------------------------------------------------------------------------------------------------------------------------------------------------------------------------------------------------------------------------------------------------------------------------------------------------------------------------------------------------------------------------------------------------------------------------------------------------------------------------------------------------------------------------------------------------------------------------------------------------------------------------------------------------------------------------------------------------------------------------------------------------------------------------------------------------------------------------------------------------------------------------------------------------------------------------------|
| GO:0022603             | 0.219914  | 0       | 0   | 139             | regulation of anatomical structure morphogenesis              | KLK8,SIPA1L1,NRCAM,CACNA1A,TLX2,TIAM1,THY1,SYNGAP1,KNDC1,NGF,ROBO1,RHO,SLIT2,PRKCB1,PALM,EPHB2,ANXA7,PTPRF,GAS7,ULK1,RPS29,MAPT,NTRK3,POU3F2,NRP1,RTN4R,FGD3,ULK2,RHO,EPB4.2,LZTS1,GAS2,ITGA7,FGD1,CDH2,CDC42EP2,YWHAH,MT3,TGFBF1,TTL,EPB4.1,SLC26A5,GNA12,RTN4,RUNX2,SPNB4,KIT,DYNLL1,PALM2,CENTD3,PALMD,TGFB3,CNA1,MYH14,PPP6C,SPRR1B,NEFL,LIMK1,EZR,SPRR2A,CDC42EP5,LST1,AMIGO1,BBS4,SHROOM3,ROBO2,CDC42EP4,FGD5,SEMA4F,PDPN,PSEN1,PTK2,GRLF1,HOPX,FGD4,CDC42SE1,CYFIP1,DPYSL2,BARHL2,WNT7A,MYH10,P2RX5,KBTD10,DLCL1,MIF,CSF1,FYN,TNFRSF11B,SGK1,SEMA4D,FERMT2,PLXNA3,CHRN2,TNFRSF12A,ITGB2,NEFM,LRRC4C,CSPG4,CDH4,ACHE,ATP10A,METRNL,PLXNB2,NTN1,CENTD2,FGD6,RASA1,EPB4.1L2,TAOK2,APOE,PLXNB1,ARHGAP15,CFDP1,CDC42,MBP,RUFY3,CIT,FGD2,NGFR,GNA13,ARFIP2,CHRNA3,CDC42EP1,SEMA3F,ARHGEF18,CDC42SE2,TGFB2,RNF6,MYH9,EFNA1,SEMA3A,CDC42EP3,RHOJ,ERMN,SMAD1,FBLIM1,IFT88,PRKCO,SPP1                                                                                                                                                                                                                                                                                                                                                                           |
| GO:0050854             | 0.5967622 | 0       | 0   | 12              | regulation of antigen receptor-mediated signaling pathway     | BCL10,THY1,CBLB,TRAT1,PTPN6,PAWR,ELF1,LCK,NFAM1,UBASH3A,PTPRC,MALT1                                                                                                                                                                                                                                                                                                                                                                                                                                                                                                                                                                                                                                                                                                                                                                                                                                                                                                                                                                                                                                                                                                                                                                                          |
| GO:0032012             | 0.3240896 | 0       | 0   | 40              | regulation of ARF protein signal transduction                 | GIT1,IQSEC2,CENTG3,D10BWG1379E,IQSEC3,CENTB5,ARFGEF2,IQSEC1,CENTG2,GBF1,PSCD3,PSD,PSD4,CENTG1,PSCD1,PSD3,CENTD3,CENTD1,SMAP1,CENTA1,DDEF1,ARFGEF1,USP36,SMAP2,CENTB1,PSCD2,HRBL,PSD2,HRB,CENTB2,ARFGAP3,GIT2,CENTD2,CENTA2,FBXO8,DDEF2,ARFGAP1,DDEF1,ARFGAP2,PSCD4                                                                                                                                                                                                                                                                                                                                                                                                                                                                                                                                                                                                                                                                                                                                                                                                                                                                                                                                                                                           |
| GO:0050770             | 0.4455861 | 0       | 0   | 51              | regulation of axonogenesis                                    | KLK8,NRCAM,CACNA1A,TIAM1,THY1,SYNGAP1,NGF,ROBO1,SLIT2,EPHB2,ULK1,MAPT,NTRK3,POU3F2,NRP1,RTN4R,ULK2,CDH2,TTL,RTN4,NEFL,LIMK1,AMIGO1,ROBO2,SEMA4F,PSEN1,PTK2,DPYSL2,BARHL2,WNT7A,MIF,SEMA4D,PLXNA3,TNFRSF12A,NEFM,LRRC4C,CSPG4,CDH4,ACHE,METRNL,PLXNB2,NTN1,APOE,PLXNB1,MBP,RUFY3,SEMA3F,RNF6,EFNA1,SEMA3A,SPP1                                                                                                                                                                                                                                                                                                                                                                                                                                                                                                                                                                                                                                                                                                                                                                                                                                                                                                                                                |
| GO:0050848             | 0.4088918 | 0       | 0   | 21              | regulation of calcium-mediated signaling                      | L1CAM,DRD4,SLA2,CD4,TRAT1,CD24A,ZAP70,NCAM1,P2RX3,CD8A,CD3E,RGN,ITGAL,P2RX5,FCER1A,SYK,P2RX4,KDR,CDH13,P2RX2,LHCGR                                                                                                                                                                                                                                                                                                                                                                                                                                                                                                                                                                                                                                                                                                                                                                                                                                                                                                                                                                                                                                                                                                                                           |
| GO:0043370             | 0.457744  | 0       | 0   | 14              | regulation of CD4-positive, alpha beta T cell differentiation | BCL6,IRF4,FOXP3,HLX,IL2RG,RC3H1,IL6,SASH3,IL12RB2,CD86,IL27,IL4RA,CD80,SOC5                                                                                                                                                                                                                                                                                                                                                                                                                                                                                                                                                                                                                                                                                                                                                                                                                                                                                                                                                                                                                                                                                                                                                                                  |
| GO:0051128             | 0.1546555 | 0       | 0   | 382             | regulation of cellular component organization and biogenesis  | KLK8,SIPA1L1,SNPH,NRCAM,ARPC3,CACNA1A,CLIP2,SPNB3,PVRL1,PFN1,ARPC2,NEBL,MTAP4,TLX2,ELN,TIAM1,THY1,SYNGAP1,KNDC1,NGF,ACTR3B,ROBO1,AHR,MTAP2,TNF,SPNB2,RHO,PRKCA,SLIT2,NEDD4L,STON1,EIF4EBP1,PALM,MTAP1A,TRIM54,CK,NF2,EPHB2,EPB4.9,CAND1,ANXA7,SPNA2,MYBPC3,CAPG,PTPRF,MYCBP2,AP2S1,DST,FOXP3,GAS7,ULK1,RPS29,EIF2AK1,RA B3A,MAPT,ARHGEF10L,CALY,PTEN,NTRK3,POU3F2,NRP1,RTN4R,FGD3,DYRK1A,ERCC1,NEB,HCF1,TMSB4X,BIN1,EVL,LIMA1,EIF3E,RAB5B,CBL,ULK2,RHOQ,MET,EIF2AK3,EPB4.2,MIB1,LZTS1,GAS2,ITGA7,TRIOBP,FGD1,EIF4EBP2,CDH2,SNAP25,APC,ASZ1,GHSR,UBE2N,STON2,CFL1,CDKN1B,CDC42EP2,FGF10,YWHAH,PACIN1,MT3,CCDC100,TGFB1,FMN1,TTL,EIF3K,EPB4.1,GRIK5,EIF2C1,EIF4G3,UBB,SLC26A5,CLASP1,GNA12,RTN4,TLK1,TMSB10,IHG-6,SPNB4,FCER1G,STMN1,KIT,EIF3J,DYNLL1,EIF2B3,PALM2,MDN1,DAZL,CENTD3,CORO1A,EIF5A,PALMD,AVIL,TGFB3,PDGFA,SPNA1,PSRC1,MYH14,GATA2,TACC2,FCGR2B,EIF3I,ARPC5,WNT2,PPP6C,SPRR1B,NEFL,NCK2,AHSG,TPM1,TERC,SPACA3,LIMK1,EZR,SPRR2A,CAPZA3,EIF2B2,CD209B,CDC42EP5,CCDC88A,LST1,AMIGO1,DBNL,BBS4,TPPP,EIF2B5,TSC1,EPN2,CAV2,ACTR3,MLL1,SHROOM3,ROBO2,4930503E24RIK,VILL,CDC42EP4,TSC2,FGD5,SHROOM2,MAPK8,EIF4G1,SEMA4F,CAPZA2,PDPN,BZW2,HMGB1,TERF2,PSEN1,GHRL,PAIP2B,PTK2,GRLF1,DSTN,BOLL,DYNC1L1,FGD4,RAB4A,SFTPD,EIF4EBP3,ATF7IP,FCGR3,PACIN3,EIF2B4 |
| GO:0032535             | 0.3218137 | 0       | 0   | 68              | regulation of cellular component size                         | ARPC3,ALS2,SPNB3,PFN1,ARPC2,NEBL,ELN,ACTR3B,SPNB2,EPB4.9,SPNA2,CAPG,NEB,TMSB4X,EVL,LIMA1,MET,TRIOBP,ASZ1,CFL1,CDC42EP2,FMN1,TMSB10,CORO1A,AVIL,SPNA1,ARPC5,WNT2,NEFL,NCK2,TPM1,CAPZA3,CDC42EP5,DBNL,CAV2,ACTR3,VILL,SHROOM2,CAPZA2,DSTN,CAPZA1,WNT7A,RHOA,SPNB1,LATS1,ARPC1B,ARF6,ARPC1A,RAC1,ARPC5L,VPS24,GSN,VIL1,NCK1,NEFM,CAPZB,RASA1,CLEC2I,SVIL,CXCL12,CIT,SCIN,MAP3K1,TMOD3,RDX,CTTNBP2,PFN2,DLG1                                                                                                                                                                                                                                                                                                                                                                                                                                                                                                                                                                                                                                                                                                                                                                                                                                                     |
| GO:0002718             | 0.6607299 | 0       | 0   | 12              | regulation of cytokine production during immune response      | BCL10,BCL6,FOXP3,TRAF6,TRAF2,FCER1G,SASH3,IL21,MAP3K7,NOD2,HMOX1,MALT1                                                                                                                                                                                                                                                                                                                                                                                                                                                                                                                                                                                                                                                                                                                                                                                                                                                                                                                                                                                                                                                                                                                                                                                       |
| GO:0017157             | 0.5345379 | 0       | 0   | 37              | regulation of exocytosis                                      | CACNA1A,PCLO,SPNB3,STX1A,RAB3D,SEPT5,MYO5A,PRKCA,VAMP2,FREQ,RAB3A,CADPS2,RAB27B,SYCN,SYT1,PRAM1,RAB3C,FCER1G,RPH3AL,TRPV6,TRIM9,SYT4,CADPS,FE22,POU5F1,FCER1A,SYK,TRAF7,FGF2,RAB3B,HMOX1,B4GALT1,RAB26,MS4A2,CDK5,RAPGEF4,EXOC2                                                                                                                                                                                                                                                                                                                                                                                                                                                                                                                                                                                                                                                                                                                                                                                                                                                                                                                                                                                                                              |
| GO:0043087             | 0.1528426 | 0       | 0   | 103             | regulation of GTPase activity                                 | JUB,GIT1,ALS2,BCL6,CENTG3,SYDE1,PTK2B,THY1,TBC1D16,TBC1D14,TBC1D10C,CENTB5,CHML,TBC1D10A,RAB3GAP2,FGD3,CENTG2,TBC1D9,TBC1D10B,TBC1D5,FGD1,RABGAP1,ALS2CR12,ADPRHL1,GDI2,SGSM2,CENTG1,EVIS1,TBC1D20,VAV1,NF1,PAFAH1B1,TBC1D9B,TBC1D24,TBC1D30,CENTD3,CENTD1,TBC1D2,AMPH,SMAP1,TBC1D13,TSC1,CENTA1,A630047E20RIK,TBC1D22B,TBC1D8B,TSC2,FGD5,VAV3,ARHGAP1,SGSM1,FGD4,DDEF1,TBC1D22A,TBC1D21,GDI1,RASGRF1,SMAP2,TBC1D15,CENTB1,SYDE2,TBC1D25,HRBL,EVIS,TBC1D7,HRB,STMN3,SGSM3,CENTB2,ARFGAP3,TBC1D17,GIT2,RAB3GAP1,S1PR1,TBC1D23,CHM,ARHGAP6,CENTD2,FGD6,TBC1D12,TBC1D8,CENTA2,RALBP1,FOXJ1,TBC1D4,GRTP1,FGD2,DDEF2,ARFGAP1,RABGAP1,MAP2K1,DOCK7,TBC1D19,ARHGAP27,DDEF1,RA2GRP3,TBC1D2B,TBC1D1,SGS9,WDR67,USP6NL,ARFGAP2,RAPGEF6                                                                                                                                                                                                                                                                                                                                                                                                                                                                                                                                 |



Table S1A. Gene sets up-regulated by severe stress

| Gene Ontology category | Score     | p-value | FDR | Gene set length | Gene_set_description                                              | Gene_set_genes                                                                                                                                                                                                                                                                                                                                                                                                                                                                                                                                                                                                                                                                                                                                                                                                                                                                                                                                                                                                                                                                                                                                                                   |
|------------------------|-----------|---------|-----|-----------------|-------------------------------------------------------------------|----------------------------------------------------------------------------------------------------------------------------------------------------------------------------------------------------------------------------------------------------------------------------------------------------------------------------------------------------------------------------------------------------------------------------------------------------------------------------------------------------------------------------------------------------------------------------------------------------------------------------------------------------------------------------------------------------------------------------------------------------------------------------------------------------------------------------------------------------------------------------------------------------------------------------------------------------------------------------------------------------------------------------------------------------------------------------------------------------------------------------------------------------------------------------------|
| GO:0051336             | 0.1023464 | 0       | 0   | 244             | regulation of hydrolase activity                                  | JUB,GIT1,BCL10,ALS2,CDKN2D,BCL6,CENTG3,MYH6,SYDE1,PTK2B,THY1,FURIN,MYL4,TNF,PPP1R2,ADRA1A,APOA5,TBC1D16,TBC1D14,TBC1D10C,CKK,AVPR1A,MYBPC3,SAPS2,CENTB5,NOS1,CHML,TBC1D10A,CASP9,RAB3GAP2,FGD3,C6,APOC3,ANGPTL4,GNAQ,RASGRP4,APOA1,CENTG2,HIP1,APOH,CASR,TBC1D9,EIF2AK3,TBC1D10B,BAD,TBC1D5,AVPR1B,BAK1,FGD1,GNAT1,RABGAP1L,HSPA1B,C5AR1,ALS2CR12,FOXL2,SORT1,PDCC6,ADPRHL1,TNFSF15,GDI2,BCL2L10,SGSM2,CENTG1,GSPT1,EVI5L,NLRP2,CASP8AP2,PRKCZ,MYL3,PPP2R4,DNAJB6,TBC1D20,AGTR2,MYC,VAV1,NF1,PAFAH1B1,BBC3,TBC1D9B,CFLAR,PYCARD,TBC1D24,CDKN2A,NMUR1,TPM2,TBC1D30,CENTD3,CENTD1,VCP,TBC1D2,LPAR2,BIRC5,AMPH,TPM1,PTMA,C9,SMAP1,NR4A1,TBC1D13,TSC1,CENTA1,A630047E20RIK,TBC1D22B,TBC1D8B,TSC2,FGD5,SAPS1,VAV3,IFT57,ARHGAP1,SGSM1,NEIL1,APAF1,ADCYA,P1R1,LCK,FGD4,CDH1,GCHFR,DDEF1,TBC1D22A,RGN,TBC1D21,TNNI3,GDI1,FABP1,TRP53,RASGRF1,MTCH1,SMAP2,RHOA,APOC2,ABHD5,ANGPTL3,PML,APOA2,TBC1D15,DLCL1,BAX,PLCB2,CENTB1,CCKBR,SYDE2,GNA15,BCL2L13,TBC1D25,PLA2G1B,CAV1,F2,HRBL,HSPA1A,EVI5,CASP4,PMAIP1,TBC1D7,HRB,GM2A,NOD1,STMN3,FANCG,SGSM3,CENTB2,CYCS,TNNT3,ARFGAP3,COL4A3,ANG,GABARAPL2,TBC1D17,SAPS3,NMUR2,GIT2,IFNB1,RAB3GAP1,S1PR1,TBC1D23,LEPR,MOAP1,SFN,CHM,ERN1,ARHGA    |
| GO:0050994             | 0.6332206 | 0       | 0   | 10              | regulation of lipid catabolic process                             | ADORA1,MLYCD,APOA5,PPARA,FRAP1,CPT1A,FABP1,CIDEA,ANGPTL3,APOA2                                                                                                                                                                                                                                                                                                                                                                                                                                                                                                                                                                                                                                                                                                                                                                                                                                                                                                                                                                                                                                                                                                                   |
| GO:0048169             | 0.4110225 | 0       | 0   | 28              | regulation of long-term neuronal synaptic plasticity              | GRIN2B,DLG4,SYNGAP1,LNPEP,RIMS1,GRIN2A,EPHB2,DRD5,HRAS1,BDNF,NF1,SNCA,KIT,GRIN1,GRM5,PLK3,KRAS,NRAS,S100B,EGR1,NPTN,KDR,GRIK2,DRD1A,DRD2,CAMK2G,AGT,GRIK1                                                                                                                                                                                                                                                                                                                                                                                                                                                                                                                                                                                                                                                                                                                                                                                                                                                                                                                                                                                                                        |
| GO:0001505             | 0.2561141 | 0       | 0   | 166             | regulation of neurotransmitter levels                             | SNPH,CACNA1A,PCLO,PPFIA3,SPNB3,GRIN2B,STX1A,ADORA1,CPLX2,SEPT5,NGF,CAMK2A,NPY2R,DRD4,UNC13A,NRXN1,VAMP2,RIMS1,GRIN2A,CACNA1B,BTK,PRKCB1,GDNF,TPH1,SYN1,SLC17A7,SYN2,SYN3,APBA1,RAB3A,EPAS1,GCH1,SLC6A4,NRXN2,LIN7C,PNMT,SNCB,GABRA2,TGFB2,GRM7,SNAP25,APBA2,ARHGFE11,NLGN1,CELSR1,EDN3,COLOQ,NISCH,LPHN1,CPLX1,AGTPBP1,GATA3,BDNF,DOC2A,SV2B,COMT,ERC2,GRIK5,SYT1,NF1,SNCA,RAB3C,RAB15,NSF,STX7,PRIMA1,GRM2,DYNLL1,LIN7A,ADRBK1,SLC1A3,HNMT,NR4A2,CACNA1F,IL1B,NPR1,KCNMB4,ATP7A,STX3,HCRT,GLUL,PSEN1,LIN7B,CACNB4,IL1RN,NRXN3,GCHFR,HPRT1,CHRNA7,TRIM9,CHRN8,DBH,CARTPT,WNT7A,PRG3,PINK1,SYT3,YWHAZ,CLN8,SYT4,CADPS,TH3,AP3M2,DVLI1,RIMS4,NALAD2,NTRK2,CHRN2,GRM4,ADORA3,ACHE,RAB14,TRH,PPT1,ALDH9A1,CPLX4,SLC17A6,SLC25A4,SLC22A3,ALDH5A1,PDYN,MAOB,PARK2,ATP1A2,HTR2A,NOS1AP,CHAT,SYT2,CHRNA6,HRH3,HTR2C,CHRNA4,DRD3,SLC5A7,PARK7,RAB26,MAOA,SLC6A3,SYT12,CHRNA3,STX4A,NPY5R,UNC13B,GIPIC1,CPLX3,SNAPIN,UNC13C,TPH2,BAIAP3,PLDN,DRD1A,DRD2,ABAT,SNCAIP,CLN3,AGT,HTR1B,GRM8,ICA1,MYO6,STXB2,ADORA2A,GRIK1,GAD2,GAD1,DDC                                                                                                                                                        |
| GO:0002700             | 0.5901303 | 0       | 0   | 15              | regulation of production of molecular mediator of immune response | BCL10,BCL6,IL13,FOXP3,TRAF6,TRAF2,FCER1G,SASH3,IL21,MAP3K7,NOD2,FOXP1,HMOX1,MALT1,IL13RA1                                                                                                                                                                                                                                                                                                                                                                                                                                                                                                                                                                                                                                                                                                                                                                                                                                                                                                                                                                                                                                                                                        |
| GO:0046578             | 0.2274692 | 0       | 0   | 189             | regulation of Ras protein signal transduction                     | KALRN,GIT1,PLEKHG5,ALS2,IQSEC2,BCL6,SOS1,CENTG3,SYDE1,PTK2B,TIAM1,ARHGFE10,D10BWG1379E,TNK1,IQSEC3,RGNEF,TRIO,ARHGFE5,TBC1D16,TBC1D14,TBC1D10C,DEPDC2,CENTB5,FARP1,ARFGFE2,ARHGFE12,ARHGFE10L,TBC1D10A,ARHGAP20,ARHGFE17,FGD3,ERBB2,RASGRP4,IQSEC1,CENTG2,ABR,ITSN2,SOS2,TBC1D9,ECT2,TBC1D10B,VAV2,D10ERTD610E,TBC1D5,GBF1,PSCD3,PSD,ARHGFE4,FGD1,CDH2,PSD4,PPP2CB,ARHGAP4,RABGAP1L,ARHGFE11,ADPRHL1,TTN,SGSM2,CENTG1,EVI5L,TIMP2,PSCD1,KITL,NET1,TBC1D20,VAV1,MFN2,RASGRF2,PSD3,NF1,PAFAH1B1,TBC1D9B,TBC1D24,ITSN1,TBC1D30,CENTD3,CENTD1,NRG1,BCR,TBC1D2,ITPKB,SMAP1,TBC1D13,TSC1,CENTA1,TIAM2,A630047E20RIK,BC067047,FARP2,TBC1D22B,TBC1D8B,FGD5,VAV3,ARHGFE16,DOCK2,PLEKHG4,SGSM1,FGD4,ARHGFE7,DDEF1,TBC1D22A,ARFGFE1,TBC1D21,USP36,NUP62,RASGRF1,SMAP2,TBC1D15,PLEKHG3,DLCL1,ARHGFE2,CENTB1,SYDE2,TBC1D25,CSF1,PSCD2,ARF6,HRBL,PSD2,4933429F08RIK,EVI5,DNMBP,KRAS,MCF2L,TBC1D7,RAC1,HRB,EPO,CRK,E130112L23RIK,STMN3,SGSM3,NOTCH2,CENTB2,ARPP19,ARHGFE6,ARHGFE9,ARFGAP3,E130306D19RIK,NRAS,TBC1D17,IGF1,SH2B2,GIT2,S1PR1,TBC1D23,PLEKHG1,OBSCN,CENTD2,FGD6,ARHGFE19,PLCE1,TBC1D12,PLEKHG6,ABRA,TBC1D8,CENTA2,RALBP1,FBXO8,FOXJ1,TBC1D4,GRTP1,FGD2,DDEF2,ARHGFE3,ARFGAP1,RABGA |
| GO:0035023             | 0.3576424 | 0       | 0   | 85              | regulation of Rho protein signal transduction                     | KALRN,PLEKHG5,ALS2,BCL6,SOS1,SYDE1,PTK2B,TIAM1,ARHGFE10,RGNEF,TRIO,ARHGFE5,DEPDC2,FARP1,ARHGFE12,ARHGFE10L,ARHGAP20,ARHGFE17,FGD3,ABR,ITSN2,SOS2,ECT2,VAV2,D10ERTD610E,ARHGFE4,FGD1,CDH2,ARHGAP4,ARHGFE11,TTN,NET1,VAV1,RASGRF2,PAFAH1B1,ITSN1,CENTD3,BCR,TSC1,TIAM2,BC067047,FARP2,FGD5,VAV3,ARHGFE16,PLEKHG4,FGD4,ARHGFE7,RASGRF1,PLEKHG3,DLCL1,ARHGFE2,SYDE2,4933429F08RIK,DNMBP,MCF2L,RAC1,E130112L23RIK,STMN3,ARHGFE6,ARHGFE9,E130306D19RIK,PLEKHG1,OBSCN,CENTD2,FGD6,ARHGFE19,PLEKHG6,ABRA,RALBP1,FOXJ1,FGD2,ARHGFE3,AKAP13,ARHGFE18,DOCK7,ARHGAP27,9130221D24RIK,SLC26A10,SPATA13,PLEKHG2,ARHGFE1,NGEF,MCF2,ARHGFE15                                                                                                                                                                                                                                                                                                                                                                                                                                                                                                                                                      |
| GO:0051931             | 0.7458762 | 0       | 0   | 13              | regulation of sensory perception                                  | HBA-A2,NPY2R,GRIN2A,CCK,NOS1,IL10,GRM1,GRM3,EDNRB,HTR2C,F2R,ADRB2,GRIN2D                                                                                                                                                                                                                                                                                                                                                                                                                                                                                                                                                                                                                                                                                                                                                                                                                                                                                                                                                                                                                                                                                                         |

**Table S1A. Gene sets up-regulated by severe stress**

| Gene Ontology category | Score     | p-value | FDR | Gene set length | Gene_set_description                                    | Gene_set_genes                                                                                                                                                                                                                                                                                                                                                                                                                                                                                                                                                                                                                                                                                                                                                                                                                                                                                                                                                                                                                                                                                                                                                                                |
|------------------------|-----------|---------|-----|-----------------|---------------------------------------------------------|-----------------------------------------------------------------------------------------------------------------------------------------------------------------------------------------------------------------------------------------------------------------------------------------------------------------------------------------------------------------------------------------------------------------------------------------------------------------------------------------------------------------------------------------------------------------------------------------------------------------------------------------------------------------------------------------------------------------------------------------------------------------------------------------------------------------------------------------------------------------------------------------------------------------------------------------------------------------------------------------------------------------------------------------------------------------------------------------------------------------------------------------------------------------------------------------------|
| GO:0051056             | 0.1912763 | 0       | 0   | 250             | regulation of small GTPase mediated signal transduction | SIPA1L1,KALRN,GIT1,PLEKHG5,ALS2,IQSEC2,BCL6,SOS1,SIPA1L3,CENTG3,RELN,SYDE1,PTK2B,RAPGEF1,TIAM1,SYNGAP1,ARHG EF10,KNDC1,D10BWG1379E,TNK1,IQSEC3,RGNEF,TRIO,ARHGEF5,TBC1D16,TBC1D14,TBC1D10C,DEPDC2,CENTB5,FARP1,IQG AP2,ARFGEF2,DAB2IP,ARHGEF12,CDC42BPB,ARHGEF10L,TBC1D10A,ARHGAP20,RAPGEF2,ARHGEF17,FGD3,ERBB2,RASGRP4,I QSEC1,CENTG2,RALGDS,ABR,ITSN2,SOS2,TBC1D9,ECT2,TBC1D10B,VAV2,D10ERTD610E,RASGRP1,TBC1D5,GBF1,TAPBP,PSCD3 ,PSD,ARHGEF4,FGD1,CDH2,RGL1,PSD4,PPP2CB,ARHGAP4,RABGAP1L,ARHGEF11,LTB,ADPRHL1,TTN,SGSM2,CENTG1,CDC42BP A,EVI5L,TIMP2,PSCD1,KITL,NET1,TBC1D20,VAV1,MFN2,RASGRF2,PSD3,NF1,PAFAH1B1,TBC1D9B,TBC1D24,GARNL4,A430107 D22RIK,ITSN1,TBC1D30,CENTD3,CENTD1,NRG1,BCR,TBC1D2,ITPKB,LST1,SMAP1,TBC1D13,TSC1,CENTA1,RASGEF1C,TIAM2,A6 30047E20RIK,BC067047,FARP2,TBC1D22B,TBC1D8B,TSC2,RASGEF1A,FGD5,VAV3,ARHGEF16,DOCK2,PLEKHG4,SGSM1,A23006 7G21RIK,GARNL3,DDR1,FGD4,ARHGEF7,DDEF1,TBC1D22A,RAPGEF5,RGL3,ARFGEF1,TBC1D21,ATP6V1G2,USP36,NUP62,WDR 46,RASGRF1,B230339M05RIK,SMAP2,RASAL2,RASA3,TBC1D15,B3GALT4,PLEKHG3,DLCL1,ARHGEF2,CDC42BPG,CENTB1,SYDE2, POU5F1,TBC1D25,CSF1,RASAL1,PSCD2,ARF6,HRBL,PSD2,4933429F08RIK,EVI5,DNMBP,KRAS,MCF2L,TBC1D7,ZBTB9,RAC1,HRB |
| GO:0050803             | 0.498238  | 0       | 0   | 22              | regulation of synapse structure and activity            | KLK8,PVRL1,SYNGAP1,PRKCA,PTPRF,USH1C,CYP19A1,SNAP25,GHSR,UBB,GHRL,PTK2,AGRN,WNT7A,COL4A4,SYT10,APP,CHRN B2,PPT1,THBS2,MUSK,PICK1                                                                                                                                                                                                                                                                                                                                                                                                                                                                                                                                                                                                                                                                                                                                                                                                                                                                                                                                                                                                                                                              |
| GO:0048167             | 0.4365919 | 0       | 0   | 75              | regulation of synaptic plasticity                       | SIPA1L1,PPFIA3,PLAT,GRIN2B,DLG4,ADORA1,YWHAG,SYNGAP1,NCDN,ADRB1,LNPEP,RIMS1,GRIN2A,MMP9,HTT,EPHB2,CAMK 2N2,ATP2B2,DRD5,HRAS1,CTNND2,LZTS1,SYP,P2RX3,YWHAH,EGR2,BDNF,BHLHB2,UBB,NF1,SNCA,CABP1,NFATC4,CRHR1,KIT ,RHEB,DBN1,GSK3B,RNF39,GRIN1,GRIN2C,GRM5,PSEN1,PLK3,RASGRF1,ARC,KRAS,NRAS,MYLK2,S100B,CPEB1,NTF5,EGR1,VGF ,NPTN,PPT1,APOE,CALB1,BCAN,STAR,PSEN2,KDR,GRIK2,GIPC1,CTNNA4,CDK5,PMCH,DRD1A,DRD2,CAMK2G,AGT,BHLHB3,MYO 6,ADORA2A,GRIK1                                                                                                                                                                                                                                                                                                                                                                                                                                                                                                                                                                                                                                                                                                                                              |
| GO:0045580             | 0.2253941 | 0       | 0   | 46              | regulation of T cell differentiation                    | BCL6,IRF4,CARD11,IL7R,FOXP3,IL7,IL15,ZAP70,AP3B1,SPINK5,ADA,BAD,IL2RA,H2-OA,HLX,CD1D1,CD74,ITPKB,IL2RG,RC3H1,IL6,SASH3,IL12RB2,AP3D1,H2-AA,CD86,IL27,IL4RA,CD80,LCK,SOC5,SOD1,HSP90AA1,SYK,SHH,CD27,PTPRC,IL2,PNP1,CD2,VNN1,SART1,FOXJ1,TGFBR2,CLPT M1,H2-DMA                                                                                                                                                                                                                                                                                                                                                                                                                                                                                                                                                                                                                                                                                                                                                                                                                                                                                                                                 |
| GO:0050856             | 0.8569281 | 0       | 0   | 10              | regulation of T cell receptor signaling pathway         | BCL10,THY1,CBLB,TRAT1,PTPN6,PAWR,ELF1,LCK,UBASH3A,MALT1                                                                                                                                                                                                                                                                                                                                                                                                                                                                                                                                                                                                                                                                                                                                                                                                                                                                                                                                                                                                                                                                                                                                       |
| GO:0002026             | 0.8655894 | 0       | 0   | 16              | regulation of the force of heart contraction            | MYH6,MYL4,SLC8A1,ADRB1,PRKCA,ADRA1A,CSR3P,PLN,MYL3,ADRBK1,ATP1A1,GAA,ATP2A2,APLN,ATP1A2,ADRA1B                                                                                                                                                                                                                                                                                                                                                                                                                                                                                                                                                                                                                                                                                                                                                                                                                                                                                                                                                                                                                                                                                                |
| GO:0007266             | 0.1686133 | 0       | 0   | 125             | Rho protein signal transduction                         | KALRN,PLEKHG5,ALS2,BCL6,SOS1,SYDE1,PTK2B,TIAM1,ARHGEF10,ARHGDI,GRIT,RGNEF,TRIO,ARHGEF5,DEPDC2,FARP1,ARH GEF12,ARHGEF10L,ARHGAP20,ARHGEF17,FGD3,APOC3,APOA1,ABR,ITSN2,SOS2,ECT2,VAV2,D10ERTD610E,ARHGEF4,FGD1,C DH2,ARHGAP4,ARHGEF11,CFL1,TTN,RHOB,NET1,VAV1,RASGRF2,PAFAH1B1,GNA12,ITSN1,CENTD3,BCR,LIMK1,CDC42EP5,RH OD,TSC1,TIAM2,BC067047,FARP2,CDC42EP4,FGD5,CNKSR1,PTH,VAV3,ARHGEF16,ARHGAP1,PLEKHG4,FGD4,ARHGEF7,BAIP2 ,RASGRF1,PTPLAD1,RHOA,PLEKHG3,DLCL1,ARHGEF2,SYDE2,KIFAP3,4933429F08RIK,TAX1BP3,DNMBP,MCF2L,ARHGAP29,ADR A2A,RAC1,E130112L23RIK,STMN3,ARHGEF6,ARHGEF9,E130306D19RIK,ABCA1,PECAM1,PLEKHG1,OBSCN,ARHGAP6,SYNJ2BP, CENTD2,FGD6,ARHGEF19,APOE,PLEKHG6,ABRA,RALBP1,RHOG,CDC42,FOXJ1,FGD2,ROCK1,RTKN,ARHGEF3,GNA13,SRGAP1,C DC42EP1,CDH13,AKAP13,ARHGEF18,DOCK7,ARHGAP5,ARHGAP27,MYO9B,9130221D24RIK,SLC26A10,SPATA13,PLEKHG2,AR HGEF1,RHOJ,NGEF,ARHGDI,ARHGDI,CTNNA1,MCF2,ARHGEF15                                                                                                                                                                                                                                                                                     |
| GO:0045214             | 0.8688109 | 0       | 0   | 14              | sarcomere organization                                  | XIRP1,MYH6,MYBPC3,CAPN3,BMP10,NEB,TTN,TCAP,KRT19,KRT8,ACTG1,NEURL2,ITGB1,TNNT2                                                                                                                                                                                                                                                                                                                                                                                                                                                                                                                                                                                                                                                                                                                                                                                                                                                                                                                                                                                                                                                                                                                |
| GO:0007268             | 0.2859138 | 0       | 0   | 451             | synaptic transmission                                   | KLK8,SIPA1L1,NPTX1,SNPH,GABBR2,CACNA1A,PCDHB13,SLC6A5,ALS2,GABBR3,PCLO,PPFIA3,SHC3,KCNMA1,PLAT,CLSTN2,SP NB3,GRIN2B,BSN,DLG4,CACNA1E,PVRL1,CHRM1,STX1A,EGR3,ADORA1,KIF1B,CACNA1C,CPLX2,YWHAG,SLC1A2,ATXN1,SYNGA P1,SEPT5,NGF,CAMK2A,MYO5A,NPY2R,NCDN,DRD4,ADRB1,UNC13A,TNF,NRXN1,LNPEP,CHRNE,KCND2,PRKCA,VAMP2,RIMS1 ,GRIN2A,DNAJC5,ADRA1A,CORT,MMP9,NPTX2,KCNQ5,CACNA1B,BTK,PRKCB1,HTT,CHRNA1,SCN1B,GDNF,TPH1,EPHB2,SYNJ1,F REQ,CAMK2N2,PTPRF,DLGAP1,GABRA5,SLC17A7,TMOD2,SYN2,CLSTN1,NPFF,SYN3,CAMK4,APBA1,CHNRG,RAB3A,KIF5A,ATP2 B2,NLGN2,PPP3CA,EPAS1,STRN4,SLC1A6,CHRNA9,CD24A,HTR1F,KCNQ2,GCH1,P14KA,GABRP,USH1C,NTRG1,CHRNA2,SLC6A4, DRD5,KCNQ3,HRAS1,CTNND2,CHRM3,SLC6A2,GRIA1,NRXN2,STX1B,HOMER1,KCNN1,TAC4,LPAR3,LZTS1,LIN7C,PNMT,CYP19A 1,SNCB,GABRA2,GRIK4,TGFB2,GRM7,SNAP25,APBA2,ASZ1,KCNIP2,SYP,GHSR,ARHGEF11,NLGN1,P2RX3,CHRN1,NPBWR1,YW HAH,CELSR1,EDN3,EGR2,SYT5,COLQ,OMP,ACP2,NISCH,PRKCZ,LPHN1,CPLX1,AGTPBP1,GATA3,BDNF,BHLHB2,DOC2A,SV2B,CO MT,PCDHB4,ERC2,GRIK5,UBB,SYT1,NF1,PAFAH1B1,UTS2,SNCA,RAB3C,CABP1,CHRNA5,RAB15,NSF,STX7,NFATC4,PRIMA1,EDN 1,CRHR1,KIT,GRM2,GUC1,DYNLL1,CLSTN3,ACP1,LIN7A,ADRBK1,SLC1A3,HNMT,ACCN1,NR4A2,NRG1,PCDHB3,WNT2,GNAI1,KCN            |
| GO:0016079             | 0.813515  | 0       | 0   | 30              | synaptic vesicle exocytosis                             | SNPH,PCLO,SPNB3,STX1A,CPLX2,SEPT5,VAMP2,RIMS1,APBA1,RAB3A,SNAP25,APBA2,NLGN1,LPHN1,CPLX1,DOC2A,GRIK5,SYT 1,STX7,STX3,PSEN1,TRIM9,SYT3,SYT2,STX4A,UNC13B,CPLX3,SNAPIN,PLDN,STXB2                                                                                                                                                                                                                                                                                                                                                                                                                                                                                                                                                                                                                                                                                                                                                                                                                                                                                                                                                                                                               |
| GO:0048489             | 0.6680353 | 0       | 0   | 51              | synaptic vesicle transport                              | SNPH,PCLO,SPNB3,DLG4,STX1A,CPLX2,SEPT5,UNC13A,VAMP2,RIMS1,SH3GL2,SLC18A2,SYNJ1,APBA1,RAB3A,CD24A,BIN1,SN AP25,APBA2,SYP,NLGN1,LPHN1,CPLX1,DOC2A,GRIK5,SYT1,SNCA,STX7,ITSN1,LIN7A,AMPH,STX3,PSEN1,DENND1A,CTNNB1,TR IM9,SYT3,SYT4,STXB1,ZDHHC15,MYLK2,EEA1,SYT2,STX4A,UNC13B,CPLX3,SNAPIN,CDK5,PLDN,DNM2,STXB2                                                                                                                                                                                                                                                                                                                                                                                                                                                                                                                                                                                                                                                                                                                                                                                                                                                                                 |

Table S1A. Gene sets up-regulated by severe stress

| Gene Ontology category | Score     | p-value | FDR | Gene set length | Gene_set_description                 | Gene_set_genes                                                                                                                                                                                                                                                                                                                                                                                                                                                                                                                                                                                                                                                                                                                                                                                                                                                               |
|------------------------|-----------|---------|-----|-----------------|--------------------------------------|------------------------------------------------------------------------------------------------------------------------------------------------------------------------------------------------------------------------------------------------------------------------------------------------------------------------------------------------------------------------------------------------------------------------------------------------------------------------------------------------------------------------------------------------------------------------------------------------------------------------------------------------------------------------------------------------------------------------------------------------------------------------------------------------------------------------------------------------------------------------------|
| GO:0007416             | 0.3379588 | 0       | 0   | 45              | synaptogenesis                       | NRCAM,CACNA1A,PCDHB13,PVRL1,NRXN1,PRKCA,POU4F1,NLGN2,NRXN2,CDH2,SNAP25,GHSR,NLGN1,PCDHB4,LRP4,UBB,CADM1,NRG1,PCDHB3,PCDHB16,PCDHB14,GLRA2,PCDHB2,GHRL,PTK2,PCDHB9,CDH1,NRXN3,DNER,AGRN,WNT7A,SPOCK2,COL4A4,GJA10,PCDHB5,APP,CHRN2,ACHE,GPHN,PCDHB6,THBS2,PCDHB11,MUSK,MYO6,PCDHB10                                                                                                                                                                                                                                                                                                                                                                                                                                                                                                                                                                                           |
| GO:0050852             | 0.3761917 | 0       | 0   | 27              | T cell receptor signaling pathway    | BCL10,THY1,CBLB,FOXP3,TRAT1,TRAF6,ZAP70,PTPN6,UBE2N,CACNB3,PTPN22,CD3E,MAPK1,PAWR,BCAR1,ELF1,PSEN1,CACNB4,LCK,MAP3K7,FYN,UBASH3A,PTPRC,MALT1,IKBKG,CLEC2I,PSEN2                                                                                                                                                                                                                                                                                                                                                                                                                                                                                                                                                                                                                                                                                                              |
| GO:0042403             | 0.7474303 | 0       | 0   | 16              | thyroid hormone metabolic process    | DIO1,CACNA1A,DIO2,RELN,SLCO4A1,KCNJ6,CGA,SULT1B1,TG,DIO3,TPO,SLC5A5,MED1,FOXE1,DUOX2,TTR                                                                                                                                                                                                                                                                                                                                                                                                                                                                                                                                                                                                                                                                                                                                                                                     |
| GO:0007351             | 0.8415342 | 0       | 0   | 9               | tripartite regional subdivision      | TDGF1,HOXB6,TCF3,PCSK6,TBX3,NCKAP1,FRS2,HOXD8,T                                                                                                                                                                                                                                                                                                                                                                                                                                                                                                                                                                                                                                                                                                                                                                                                                              |
| GO:0001829             | 0.5716052 | 0       | 0   | 11              | trophectodermal cell differentiation | ESRRB,HAND1,FOXD3,ADA,JUNB,NODAL,SRF,HOPX,SP3,CITED2,SP1                                                                                                                                                                                                                                                                                                                                                                                                                                                                                                                                                                                                                                                                                                                                                                                                                     |
| GO:0016055             | 0.2407138 | 0       | 0   | 144             | Wnt receptor signaling pathway       | MARK4,CELSR2,KREMEN1,FZD5,WNT1,HHEX,FZD10,WNT10A,BCL9,FRZB,FOXL1,WNT7B,KREMEN2,RSP03,AXIN1,DVL3,AES,TCF3,LRP1,WNT2B,RSP04,TLE3,PYGO1,WNT8B,CSNK1E,DKK3,NKD2,CTNBP1,ZEB2,CSNK1G1,MET,WNT16,SFRP5,WNT5B,DKK1,APC,ASZ1,TLE1,TLE6,WNT8A,FGF10,FBXW2,FZD9,CXXC4,WNT3,FZD1,MACF1,PPP2R1A,APC2,LRP4,WISP1,CSNK1G3,LRP5,FZD4,LEF1,FZD2,CPZ,NDPH,WNT2,SFRP4,PYGO2,NXN,WNT3A,RSP01,WNT5A,CALCOCO1,LRRFIP2,ZBTB33,PIAS4,DACT1,CAV2,GSK3B,ROR2,TSC2,FZD7,LRP6,TGFB1I1,SLC9A3R1,DKK2,CAPZA2,CSNK1G2,WNT10B,DKK4,FRAT2,CTNBP1,WIF1,CTNND1,WNT11,SENP2,WNT4,TCF7,BARX1,WNT7A,FBXW4,PROP1,NLK,AXIN2,HBP1,BTRC,MDFI,CSNK2A2,SOSTDC1,WNT9A,SIX3,CHD8,DVL1,AX1BP3,RSP02,FBXW11,WNT6,CSNK2B,CCDC88C,LDB1,FZD3,CSNK1D,CSNK2A1,MDFIC,PEG12,FZD6,INVS,MITF,GSC,TLE2,FZD8,PPAP2B,TLE4,SFRP1,DIXDC1,HNF1A,FGF9,FRAT1,SFRP2,CBY1,CSNK1A1,PITX2,DVL2,PORCN,PPP2CA,WNT9B,NKD1,CTTNBP2,KLHL12,BRD7,TCF7L2 |

**Table S1B. Gene sets down-regulated by severe stress**

| Gene Ontology category | Score    | p-value | FDR | Gene set length | Gene set description                               | Gene set genes                                                                                                                                                                                                                                                                                                                                                                                                                                                                                                                                                                                                                                                                                                                                                                                                                                                                                                                                                                                                                                                                                                                                                                         |
|------------------------|----------|---------|-----|-----------------|----------------------------------------------------|----------------------------------------------------------------------------------------------------------------------------------------------------------------------------------------------------------------------------------------------------------------------------------------------------------------------------------------------------------------------------------------------------------------------------------------------------------------------------------------------------------------------------------------------------------------------------------------------------------------------------------------------------------------------------------------------------------------------------------------------------------------------------------------------------------------------------------------------------------------------------------------------------------------------------------------------------------------------------------------------------------------------------------------------------------------------------------------------------------------------------------------------------------------------------------------|
| GO:0009200             | -1.06424 | 0       | 0   | 10              | deoxyribonucleoside triphosphate metabolic process | ADA,DUT,NUDT1,PNP1,CMPK2,TBPL1,RRM2B,DTYMK,DGUOK,NUDT15                                                                                                                                                                                                                                                                                                                                                                                                                                                                                                                                                                                                                                                                                                                                                                                                                                                                                                                                                                                                                                                                                                                                |
| GO:0045022             | -0.9492  | 0       | 0   | 8               | early endosome to late endosome transport          | IGH-6,LYST,VPS4B,EEA1,SNX16,FLNA,ANKRD27,HAP1                                                                                                                                                                                                                                                                                                                                                                                                                                                                                                                                                                                                                                                                                                                                                                                                                                                                                                                                                                                                                                                                                                                                          |
| GO:0008333             | -0.57461 | 0       | 0   | 8               | <a href="#">endosome to lysosome transport</a>     | VAMP7,SORT1,RHOB,LYST,M6PR,CHMP5,SNX1,ADRB2                                                                                                                                                                                                                                                                                                                                                                                                                                                                                                                                                                                                                                                                                                                                                                                                                                                                                                                                                                                                                                                                                                                                            |
| GO:0042462             | -0.97505 | 0       | 0   | 17              | eye photoreceptor cell development                 | RPGRI1,THY1,RBP3,CRB1,BBS4,RORB,PSEN1,NTRK2,GABRR2,VEGFA,PRKCI,NRL,CEP290,ALMS1,PAX6,OLFM3,RPGR                                                                                                                                                                                                                                                                                                                                                                                                                                                                                                                                                                                                                                                                                                                                                                                                                                                                                                                                                                                                                                                                                        |
| GO:0009396             | -0.71359 | 0       | 0   | 9               | folic acid and derivative biosynthetic process     | MTR,MTHFD1L,DHFR,MTHFS,MTHFD1,MTHFSD,ALDH1L1,FPGS,MTHFD2                                                                                                                                                                                                                                                                                                                                                                                                                                                                                                                                                                                                                                                                                                                                                                                                                                                                                                                                                                                                                                                                                                                               |
| GO:0006536             | -0.61263 | 0       | 0   | 13              | glutamate metabolic process                        | AMDHD1,GLUD1,GOT2,GLUL,NAGS,PRODH,PRODH2,ALDH5A1,GCLM,GOT1,GCLC,GAD2,GAD1                                                                                                                                                                                                                                                                                                                                                                                                                                                                                                                                                                                                                                                                                                                                                                                                                                                                                                                                                                                                                                                                                                              |
| GO:0009065             | -0.9563  | 0       | 0   | 17              | glutamine family amino acid catabolic process      | GLUD1,PADI3,GOT2,FAH,PRODH,GLS,ARG2,ARG1,DDAH1,PRODH2,ALDH4A1,GOT1,DDAH2,ASL,GAD2,GAD1,ASRGL1                                                                                                                                                                                                                                                                                                                                                                                                                                                                                                                                                                                                                                                                                                                                                                                                                                                                                                                                                                                                                                                                                          |
| GO:0006298             | -0.69509 | 0       | 0   | 16              | mismatch repair                                    | PMS1,MSH2,MLH3,ANKRD17,MUTYH,PMS2,TDG,ABL1,MLH1,MSH3,MSH4,MSH5,MSH6,TREX1,EXO1,POLD3                                                                                                                                                                                                                                                                                                                                                                                                                                                                                                                                                                                                                                                                                                                                                                                                                                                                                                                                                                                                                                                                                                   |
| GO:0042177             | -0.53352 | 0       | 0   | 8               | negative regulation of protein catabolic process   | GRIN2A,INS2,GRIN2C,SHH,RELA,SERPINB12,MDM4,UCHL5IP                                                                                                                                                                                                                                                                                                                                                                                                                                                                                                                                                                                                                                                                                                                                                                                                                                                                                                                                                                                                                                                                                                                                     |
| GO:0050805             | -0.52291 | 0       | 0   | 19              | negative regulation of synaptic transmission       | ADORA1,NPY2R,ADRA1A,GRM2,GNAI1,KCNQ4,GNAI2,GRM4,ACHE,SLC6A1,HTR2A,GRIK2,NPY5R,CDK5,PMCH,DRD2,BCHE,HT R1B,GRIK1                                                                                                                                                                                                                                                                                                                                                                                                                                                                                                                                                                                                                                                                                                                                                                                                                                                                                                                                                                                                                                                                         |
| GO:0000398             | -0.61113 | 0       | 0   | 147             | nuclear mRNA splicing, via spliceosome             | CPSF2,GEMIN7,TNRC4,POLR2A,POLR2J,HNRNPA0,PRPF8,MYOD1,SNUPN,BRUNOL4,EFTUD2,RNUXA,DBR1,DDX20,TXNL4A,SNRPD2,HNRPUL1,POLR2G,SNRPD3,PPP1R8,SMN1,GTFF2F1,PTBP1,POLR2L,CSTF1,GATC,SF3A1,THOC4,SF3A2,POLR2E,SF3B3,NHP2L1,GEMIN5,U2AF1,CUGBP1,POLR2H,CDC40,YBX1,CLNS1A,LSM7,ASCC3L1,POLR2F,SNRPG,SIP1,CUGBP2,PRMT5,SF3B4,CPSF1,SRPK2,CRNKL1,FUS,NUDT21,DHX9,SF3B2,PCBP1,GEMIN6,RNPS1,KHSRP,PTBP2,GEMIN4,PRPF6,LSM3,POLR2I,DDX23,CPSF3,SF3A1,SF4,POLR2B,SMC1A,GTFF2F2,SFRS10,SLU7,USP39,LSM8,SNRNP,DDX39,POLR2C,HNRNPC,HNRNPL,SNRPA,SNRPB2,HNRNP R,DHX38,HNRNPD,PAPOLA,SFRS2IP,SNRPD1,SNRPE,SFRS11,SF3B5,SF3A3,SNRPF,SFRS2,U2AF2,WDR77,CD2BP2,DHX16,PCF11,PRPF4,TXNL4B,SF1,SNW1,POLR2K,DDX1,PHF5A,MBNL1,CWC15,NCBP2,SFRS9,HNRNPU,CLP1,TGS1,PCBP2,NOVA1,NFX1,PRPF31,PRPF3,SFRS8,RBM8A,RBM5,SFRS6,CSTF3,SNRPA1,SFRS3,HNRNPA2B1,PABPN1,LSM2,BAT1A,SMNDC1,RBM25,CCAR1,GEMIN8,SRRM1,TRA2A,SF3B1,FUSIP1,MAGOH,DNAJC8,HNRNPA1,SFRS1,SFRS5,SNRP70,UPF3B,RBMX,POLR2D,CSTF2,SFRS7                                                                                                                                                                                                                          |
| GO:0006779             | -0.72847 | 0       | 0   | 18              | porphyrin biosynthetic process                     | ALAS2,TSPO,FECH,IREB2,COX10,ALAD,ALAS1,CPOX,COX15,UROD,HNF1A,NFE2L1,HMB5,SUCLA2,MMAB,UROS,PPOX,RSAD1                                                                                                                                                                                                                                                                                                                                                                                                                                                                                                                                                                                                                                                                                                                                                                                                                                                                                                                                                                                                                                                                                   |
| GO:0032388             | -0.59411 | 0       | 0   | 20              | positive regulation of intracellular transport     | TNF,GSK3B,GLI3,CDH1,TRIP6,RHOA,SMO,SHH,CD27,TNFSF14,PRKACA,SMAD3,IAK2,EDA,NCBP2,FLNA,EDAR,PRKCQ,CAPN10,UACA                                                                                                                                                                                                                                                                                                                                                                                                                                                                                                                                                                                                                                                                                                                                                                                                                                                                                                                                                                                                                                                                            |
| GO:0001522             | -0.52902 | 0       | 0   | 14              | pseudouridine synthesis                            | RPUSD3,NOLA2,NOLA3,PUS7L,PUSL1,RPUSD2,TRUB2,DKC1,RPUSD1,PUS1,PUS3,PUS7,RPUSD4,TRUB1                                                                                                                                                                                                                                                                                                                                                                                                                                                                                                                                                                                                                                                                                                                                                                                                                                                                                                                                                                                                                                                                                                    |
| GO:0050764             | -0.2518  | 0       | 0   | 20              | regulation of phagocytosis                         | PTEN,FCER1G,GATA2,FCGR2B,AHS6,SPACA3,CD209B,PTK2,SFTPD,FCGR3,PTX3,CLEC7A,MFGE8,SIRPB1,SIRPA,C3,SCARB1,TGFB1,CD47,FCGR1                                                                                                                                                                                                                                                                                                                                                                                                                                                                                                                                                                                                                                                                                                                                                                                                                                                                                                                                                                                                                                                                 |
| GO:0008380             | -0.54283 | 0       | 0   | 259             | RNA splicing                                       | LSM11,CPSF2,GEMIN7,SF2,TNRC4,ARL6IP4,PPP1R9B,PPIL3,LSM4,POLR2A,WBP11,POLR2J,SNRPN,HNRNPA0,PRPF8,MYOD1,RBMY1A1,SNUPN,BRUNOL4,SCNM1,PABPC1,EFTUD2,PPP2R1A,RNUXA,DBR1,6330548G22RIK,DDX20,RBM17,ZRSR2,SCAF1,TXNL4A,PPIL1,SNRPD2,TSEN2,HNRPUL1,POLR2G,SNRPD3,PPP1R8,SMN1,GTFF2F1,PTBP1,POLR2L,CSTF1,RBM4B,GATC,PPP4R2,SF3A1,A2BP1,THOC4,3300001G02RIK,TTF2,RBM22,SF3A2,POLR2E,SF3B3,NHP2L1,GEMIN5,ZMAT5,RRAGC,U2AF1,CUGBP1,TFIP11,MPHOSPH10,POLR2H,CDC40,PPAN,REFBP2,YBX1,WBP4,DHX8,CLNS1A,LSM7,LSM5,ASCC3L1,THOC3,POLR2F,PPARGC1A,LSM6,SNRPG,SIP1,CUGBP2,PRMT5,YTHDC1,SF3B4,CPSF1,SRPK2,LSM10,PRPF38A,CRNKL1,CDC5L,TSEN34,TRPT1,SFRS14,RALY,FUS,NUDT21,DHX9,NONO,PPIG,SF3B2,PRPF40B,PCBP1,ISY1,GEMIN6,RNPS1,KHSRP,PTBP2,LSM1,U2AF1L4,PRPF40A,MAGOHB,GEMIN4,PRPF6,STRAP,SNRPC,SFRS12IP1,LSM3,POLR2I,DDX23,ZCRB1,DDX46,CPSF3,PRPF19,SFRS4,SF4,XAB2,BC003993,POLR2B,NOL3,SMC1A,GTFF2F2,PIIE,SFRS10,SLU7,USP39,LSM8,SNRNP,DDX39,PRPF18,POLR2C,HNRNPC,HNRNPL,SNRPA,1700023B02RIK,RBMXRT,SNRPB2,HNRNPR,DHX38,FRG1,HNRNPD,PAPOLA,SART1,SFRS2IP,6530403A03RIK,SNRPD1,DDX5,PIIH,EIF4A3,1500041N16RIK,SNRPE,SFRS11,SF3B5,SF3A3,2510012J08RIK,SNRPF,SFRS2,U2AF2,WDR77,CD2BP2,RBM4,DHX16,PCF11,PRPF4, |

Table S2A. Gene sets up-regulated by mild stress plus morphine

| Gene Ontology category | Score     | p-value | FDR | Gene set length | Gene_set_description                        | Gene_set_genes                                                                                                                                                                                                                                                                                                                                                                                                                                                                                                                                                                                                                                                                                                                                                                                                                                                                                                                                                                                                                                                                                                                                                                           |
|------------------------|-----------|---------|-----|-----------------|---------------------------------------------|------------------------------------------------------------------------------------------------------------------------------------------------------------------------------------------------------------------------------------------------------------------------------------------------------------------------------------------------------------------------------------------------------------------------------------------------------------------------------------------------------------------------------------------------------------------------------------------------------------------------------------------------------------------------------------------------------------------------------------------------------------------------------------------------------------------------------------------------------------------------------------------------------------------------------------------------------------------------------------------------------------------------------------------------------------------------------------------------------------------------------------------------------------------------------------------|
| GO:0006519             | 0.1100191 | 0.00    | 0   | 372             | amino acid and derivative metabolic process | PPAT,MOXD1,OA2Z,AARSD1,YARS2,GGH,TTR,INDOL1,PDZD2,ATRN1,ACADM,DND1,ADC,GCAT,ATP7A,HTR2C,D630004A14RIK,K,AARS2,ENPP6,THNSL1,ATP2B2,CLN3,AASS,BCAT1,SLC7A6,DRD2,DIO3,AUH,HPRT1,SHMT1,DARS,PLXNB2,BCKDHB,QDPR,GCLC,ASRGL1,TARSL2,DNMT1,PEMT,BPHL,SDSL,CHRN2,MARS,ETNK1,AK3,GM853,TCF19,ABAT,UROC1,AGXT,PARK2,ACHE,HIBADH,PCBD1,TH,PRG3,OA2Z,ASNSD1,TPR,SMS,SARDH,ACTN3,SAT1,NFS1,PSAT1,CKB,DLAT,SLC7A7,KARS,GATM,PCCB,CTPS2,SLC6A3,DTD1,DHPS,GGT5,DDC,SI,COMT,HDC,GAD2,CAD,RARS2,ACAD8,DDR1,ALDH5A1,SNCB,ASTN1,SLC5A7,SLC22A17,NPR1,GS TZ1,PLOD1,GATA3,GOT2,CKMT1,CDO1,P4HB,PADI4,A230051G13RIK,SMOX,TYRP1,PTS,GAD1,COLQ,FARSA,INS2,PADI2,ODC1,DALRD3,DHFR,GFPT1,GFPT2,DRD1A,CPT1A,FOXE1,DDT,PYCR1,MAT2A,ALDH18A1,POU5F1,DDAH1,ICMT,SEPHS2,CHKA,AFMID,OAT,FRRS1,PCYT2,COL11A2,SULT1B1,DOHH,MTHFR,SLC22A5,HMG20B,SLC7A5,DUS4L,B3GALT4,HAL,AMT,GLUD1,DNMT3A,GOT1,DMGDH,GAMT,TAS1R2,GLS2,DRD4,ATP6V1G2,HDP,DDO,BHMT,TPMT,SLC45A2,ADI1,PCCA,TYR,CTPS,SLC04A1,PHF1,GCLM,LARS2,ARID2,AZIN1,PNMT,SARS2,MAOA,WDR92,IARS,DPYS,FAH,FARSB,DIP2A,AANAT,MCCC1,OA2Z,ACMSD,HARS,MOXD2,HNRPL,ASPA,AMD1,ASPA,DUOX2,SARS,GMPS,ASNS,TOR3A,BCKDK,PAH,LEM1,PHGDH,TPO,SULT1A1,EIF5A,ATF4,EIF2AK4,MTHF             |
| GO:0006520             | 0.0704953 | 0.00    | 0   | 273             | amino acid metabolic process                | PPAT,MOXD1,AARSD1,YARS2,GGH,INDOL1,PDZD2,ATRN1,DND1,ADC,GCAT,ATP7A,D630004A14RIK,AARS2,THNSL1,CLN3,AA SS,BCAT1,SLC7A6,AUH,SHMT1,DARS,PLXNB2,BCKDHB,QDPR,GCLC,ASRGL1,TARSL2,SDSL,MARS,AK3,TCF19,UROC1,AGXT,HIBADH,PCBD1,TH,ASNSD1,TPR,SMS,SARDH,ACTN3,NFS1,PSAT1,DLAT,SLC7A7,KARS,PCCB,CTPS2,DTD1,GGT5,SI,COMT,HDC,GAD2,CAD,RARS2,ACAD8,DDR1,ALDH5A1,ASTN1,SLC22A17,GSTZ1,PLOD1,GOT2,CDO1,PADI4,A230051G13RIK,TYRP1,PTS,GAD1,FAR SA,INS2,PADI2,DALRD3,DHFR,GFPT1,GFPT2,DDT,PYCR1,MAT2A,ALDH18A1,POU5F1,DDAH1,SEPHS2,AFMID,OAT,FRRS1,COL11 A2,MTHFR,HMG20B,SLC7A5,DUS4L,B3GALT4,HAL,AMT,GLUD1,GOT1,DMGDH,TAS1R2,GLS2,ATP6V1G2,HDP,DDO,BHMT,SLC4 5A2,ADI1,PCCA,TYR,CTPS,PHF1,GCLM,LARS2,ARID2,SARS2,WDR92,IARS,DPYS,FAH,FARSB,DIP2A,MCCC1,ACMSD,HARS,MOXD 2,HNRPL,ASPA,SARS,GMPS,ASNS,TOR3A,BCKDK,PAH,LEM1,PHGDH,ATF4,EIF2AK4,MTHFD1,LARS,DAXX,GLS,TUBGCP6,KHSR P,PYCR1,POLG2,HARS2,ALDH6A1,BCKDHA,DAO1,DDAH2,PADI6,ARG1,VARS2,GSS,HPDL,IARS2,WARS2,PEPD,GARS,INDO,A530 050D06RIK,MARS2,GOT1L1,0610012D14RIK,PADI1,4933437F05RIK,WDR46,LST1,FARS2,IVD,THNSL2,CARS,KMO,SHMT2,ART4 ,QARS,BHMT2,VARS,ZBTB9,AARS,6530401N04RIK,TARS,HTT,GCH1,SIRT7,SLU7,TARS2,SCYE1,BAAT,SLC25A15,CREG2,PYCR2,M |
| GO:0006725             | 0.2091618 | 0.00    | 0   | 145             | aromatic compound metabolic process         | PPAT,MOXD1,INDOL1,PAICS,FOLR1,AK1,GPHN,ATP7A,MTHFD2,HTR2C,ATP2B2,DRD2,HPRT1,SHMT1,QDPR,MTHFS,ABHD9,AK 2,DNMT1,PEMT,CHRN2,EPHX1,ABAT,CDA,PARK2,PCBD1,TH,GART,MOC51,SLC6A3,MTHFS,DDC,SI,COMT,TYMP,HDC,CAD,A LDH5A1,SNCB,ALDH1L1,NPR1,GSTZ1,GATA3,TYRP1,PTS,ALDH1L2,DHFR,MICAL3,DRD1A,DDT,UMPS,MAT2A,PIPOX,ICMT,AFMI D,CYP1A1,FRRS1,CLYBL,SULT1B1,MTHFR,MOC52,DUS4L,DNMT3A,GAMT,DRD4,HPD,TPMT,SLC45A2,TYR,PNMT,MAOA,FOLH1, DPYS,FAH,AANAT,PRPS1L1,ACMSD,MOXD2,GMPS,TOR3A,PAH,SULT1A1,MTHFD1,TGFB2,COQ6,ALDH6A1,PRHOXNB,HPDL,MA PK1,INDO,VHLH,MTHFD1L,KMO,PRPS1,PCMT1,GNMT,PCBD2,DHODH,ENPEP,MICAL1,GCH1,DPYD,ABHD4,MOC53,GSTM4,CYP 1B1,CYP1A2,MAT1A,TDO2,EPAS1,MAT2B,YWHAH,PSG18,APRT,TAT,IL4I1,TPH1,DBH,GRIN2A,CYP4B1,AOC2,MICAL2,MTPN,SN CA,FPGS,CHRNA7,HGD,MOCOS,AADAT,FTCD,KYNU,MTR,TPH2,DCT,DNMT3B,SPR,NR4A2,SNCAIP,SQLE,ANPEP,1190003J15RIK ,ATF2,EPHX2,CYP2F2,UOX                                                                                                                                                                                                                                                                                                                    |
| GO:0046034             | 0.2626966 | 0.00    | 0   | 47              | ATP metabolic process                       | ATP5F1,AK1,ATP7A,FIGNL1,ATP5J2,MYH7,MYH6,ATP6V0B,ATP5G1,LDHD,ATP5G2,ATP5G3,ATP5A1,ATP5C1,ATP5J,ATP5L,ATP 5D,SLC25A13,MYO9B,ATP5H,ATP6A1,ATP6V1F,NDUFS1,ATP5B,ATP5O,ATP6V0C,TGFB1,ND4L,ATP1A1,ATP5E,ERCC3,ACLY,AT P6V1A,ATP6V1B1,ATP6V1B2,OLA1,NADK,ABCC6,ATP6V0D2,CTNS,AK5,MON2,ATP1A2,CLCA3,ATP2A1,ENTPD1,ATP5K                                                                                                                                                                                                                                                                                                                                                                                                                                                                                                                                                                                                                                                                                                                                                                                                                                                                         |
| GO:0046395             | 0.4086843 | 0.00    | 0   | 45              | carboxylic acid catabolic process           | DCI,PHYH,ACOX2,ACADM,PEX13,HADHA,HSD17B4,FRAP1,FABP3,PEX7,PPARD,ABAT,PEX5,PCCB,ALDH5A1,CPT2,ACOX3,EHHA DH,ACADS,AKR1A4,CPT1A,HADHB,PCCA,HACL1,ACOT7,ACOXL,MLYCD,CPT1B,ECHS1,ACOX1,LEP,HAO1,ACADS,ACADVL,AKR1 D1,ECH1,BDH2,FAAH,ADIPOQ,CYP39A1,PPARA,LYPLA3,CEL,FABP1,IRG1                                                                                                                                                                                                                                                                                                                                                                                                                                                                                                                                                                                                                                                                                                                                                                                                                                                                                                                |
| GO:0044275             | 0.221493  | 0.00    | 0   | 104             | cellular carbohydrate catabolic process     | NUDT5,ADRA1B,GLB1,PGAM2,ALDOART1,OGDHL,CHIA,LDHB,PGAM1,LRR16A,FUT9,GAA,LDHAL6B,OGDH,MDH1,FUCA1,HYA L2,PGD,IGF1,HIF1A,HIBADH,TKTL1,GPI1,H6PD,ALDOA,PGK1,DLAT,6430537H07RIK,GAPDHS,GUSB,PDHB,FUT10,OVGP1,PFKL,I NS2,PYGM,BAD,MLXPL,AGL,TPI1,CHID1,PFKP,CHIT1,PGLS,MDH2,MIF,GNPDA1,LYVE1,ENO3,TREH,PKM2,PKLR,TKT,CTBS,DHT KD1,GBA2,CHI3L3,ENO1,HYAL4,ENO2,PYGL,PDHA1,PFKFB3,HK3,G6PDX,FUT8,CHI3L1,UEVLD,PGK2,GNS,PYGB,GCK,ADPGK,PFK FB1,INSR,PFKM,RPIA,ALDOC,HSD11B1,BPGM,HK1,GAPDH,CHI3L4,PDHA2,LDHC,FUT2,ARNT,HKDC1,3930401K13RIK,MGAM,FG 6PC,LDHA,FUT1,ECD,IDUA,TALDO1,ALDOART2,HYAL1,HK2,FUT4,EG277333,ALDOB,AVPR1A,FUT7                                                                                                                                                                                                                                                                                                                                                                                                                                                                                                                                                                |

Table S2A. Gene sets up-regulated by mild stress plus morphine

| Gene Ontology category | Score     | p-value | FDR | Gene set length | Gene_set_description                                            | Gene_set_genes                                                                                                                                                                                                                                                                                                                                                                                                                                                                                                                                                                                                                                                                                                                                                                                                                                                                                                                                                                                                                                                                                                                                                |
|------------------------|-----------|---------|-----|-----------------|-----------------------------------------------------------------|---------------------------------------------------------------------------------------------------------------------------------------------------------------------------------------------------------------------------------------------------------------------------------------------------------------------------------------------------------------------------------------------------------------------------------------------------------------------------------------------------------------------------------------------------------------------------------------------------------------------------------------------------------------------------------------------------------------------------------------------------------------------------------------------------------------------------------------------------------------------------------------------------------------------------------------------------------------------------------------------------------------------------------------------------------------------------------------------------------------------------------------------------------------|
| GO:0044242             | 0.1698676 | 0.00    | 0   | 95              | cellular lipid catabolic process                                | SMPDL3B,DCI,PHYH,ACOX2,ACADM,PEX13,PLCB2,HADHA,PLA2G4A,GM2A,CYP27A1,PLA2G4E,HSD17B4,FRAP1,FABP3,HEXB,P<br>EX7,PPARD,ABAT,PEX5,PCCB,ASAH3,ALDH5A1,CPT2,ACOX3,EHHADH,ACADSB,CPT1A,CYP46A1,NEU3,APOA5,ANGPTL3,SGPL1,<br>TRERF1,HADHB,PPT1,PLA2G4C,LIPE,PLCB3,APOE,PCCA,SMPD1,HACL1,PLA2G1B,SMPD4,GALC,APOC3,ENPP7,SPHK1,PRDX6,HS<br>D17B11,ACOT7,SRD5A2,ACOXL,MLYCD,HEXA,SMPDL3A,SNX17,PNPLA2,SMPD3,CPT1B,ECHS1,HSD11B1,LIPC,ACOX1,LEP,HAO<br>1,ACADS,ACADVL,AKR1D1,ECH1,AMACR,PLA2G4F,BDH2,PNPLA3,HSD17B14,NAPEPLD,PLA2G4D,GLA,YWHAH,SCARB1,HSD17<br>B6,FAAH,ADIPOQ,CYP39A1,PPARA,LPL,PLA2G4B,LYPLA3,APOB,CEL,AKR1C18,FABP1,SCARF1,CYP7A1                                                                                                                                                                                                                                                                                                                                                                                                                                                                                                                       |
| GO:0031497             | 0.3585335 | 0.00    | 0   | 109             | chromatin assembly                                              | HIST1H4I,ASF1B,HIST3H2BB,HIST1H2BG,SET,HIST1H2BN,HMGB2,HIST1H1D,HIST1H3A,HIST1H2BM,HIST2H3B,HIST1H3G,HIST<br>2H4,HIST1H2AN,H2AFV,SIRT2,ASF1A,SMARCA5,HIST1H2AO,HIST1H2BL,HIST2H3C1,HIST1H4H,HIST1H4D,NEFH,SIRT3,HIST1H<br>2AF,H3F3B,HIST2H2AC,HIST1H2BF,1700024P04RIK,HIST2H2BB,TMEM38B,HIST1H1E,H2AFY,HIST2H2AA2,HIST1H4F,HIST1H1<br>B,HIST1H2BB,NAP1L3,HIST1H2BH,HIST2H2AA1,H3F3A,CENPA,H2AFY2,PKN3,CHAF1B,HIST1H2BP,SIRT6,HIST1H1A,HELLS,NAP<br>1L5,TSPYL4,RSF1,HIST4H4,HIST1H4J,DNMT3A,SOS2,HIST1H4B,SUV39H1,MBD3,HIST1H2AK,H2AFZ,TSPYL3,HIST1H4M,MYST4,<br>HIST1H2AA,NAP1L1,HIST1H2BC,TSPYL2,1700113O17RIK,HDAC5,HIST1H2AC,TNP1,SMARCA4,NAP1L2,H1FO,HIST2H2BE,HILS1,<br>1700054O13RIK,SHPRH,HIST3H2BA,SLC22A4,HIST1H3D,CHAF1A,HIST1H2AB,HP1BP3,NAP1L4,SMARCA2,SIRT7,MYST3,HIST2H<br>3C2,H2AFX,SIRT4,HIST3H2A,HIST1H1T,H1FOO,TSPYL1,H2AFJ,SIRT1,H1FX,HIST1H1C,TSPYL5,DNMT3B,MCM2,HIST1H2BA,CBX<br>8,HIST1H3F,SIRT5,HIST1H2AE                                                                                                                                                                                                                              |
| GO:0051220             | 0.5500402 | 0.00    | 0   | 11              | cytoplasmic sequestering of protein                             | FAF1,TACC3,MDF1,MXI1,GOPC,NFKBIE,NFKBIL1,IL10,G3BP2,NFKBIA,SUFU                                                                                                                                                                                                                                                                                                                                                                                                                                                                                                                                                                                                                                                                                                                                                                                                                                                                                                                                                                                                                                                                                               |
| GO:0042994             | 0.5465605 | 0.00    | 0   | 10              | cytoplasmic sequestering of transcription factor                | FAF1,TACC3,MDF1,MXI1,NFKBIE,NFKBIL1,IL10,G3BP2,NFKBIA,SUFU                                                                                                                                                                                                                                                                                                                                                                                                                                                                                                                                                                                                                                                                                                                                                                                                                                                                                                                                                                                                                                                                                                    |
| GO:0048813             | 0.2874463 | 0.00    | 0   | 23              | dendrite morphogenesis                                          | SGK1,ATP7A,HPRT1,CHRN2B,CIT,ACHE,SMAD1,KNDC1,CDK5,CHRNA3,DVL1,PTPRF,TLX2,CELSR2,CACNA1F,DCLK1,YWHAH,CAC<br>NA1A,LZTS1,KLF7,SIPA1L1,MT3,DCX                                                                                                                                                                                                                                                                                                                                                                                                                                                                                                                                                                                                                                                                                                                                                                                                                                                                                                                                                                                                                    |
| GO:0009582             | 0.2654092 | 0.00    | 0   | 68              | detection of abiotic stimulus                                   | SLC12A2,OPN1MW,PLEKHB1,GNAT2,GUCA1A,ATP2B2,ABCA4,FYN,TACR1,PLCB4,GRIN2D,GPR98,NGFR,RCVRN,TRPC3,PDCL3,P<br>KD1,UNC119,OPN3,ACCN3,SOX2,OPN1SW,TULP1,CHRNA9,PITPNM1,NOX3,GNGT2,NPFFR2,TIMELESS,RGS9BP,PDE6B,PDE6D,<br>TAC1,PCDH15,CDH23,GNB1,OTOP1,GUCA1B,MYC,LXN,TUB,PDCL2,CHRNA10,AIPL1,NR2F6,GRK1,GRM6,CNGB1,GNAT1,OPN4,<br>FECH,PRRXL1,SAG,ACCN1,GRIN2B,PDCL,CACNA1F,TCAP,RGR,CALCA,GJA10,MKKS,GRIN2A,NR2E3,PKD2,RHO,PDC,OPN5                                                                                                                                                                                                                                                                                                                                                                                                                                                                                                                                                                                                                                                                                                                                |
| GO:0009581             | 0.1577807 | 0.00    | 0   | 75              | detection of external stimulus                                  | SLC12A2,OPN1MW,PLEKHB1,GNAT2,GUCA1A,ATP2B2,ABCA4,FYN,PLCB4,GRIN2D,GPR98,NGFR,RCVRN,TRPC3,PDCL3,PKD1,U<br>NC119,OPN3,ACCN3,SOX2,OPN1SW,TULP1,CHRNA9,PITPNM1,NOX3,GNGT2,NLRC4,PARG,RGS9BP,PDE6B,PDE6D,CLEC7A,NO<br>D2,PCDH15,CD209B,CDH23,GNB1,OTOP1,GUCA1B,NOD1,MYC,LXN,TUB,PGLYRP4,TLR1,PGLYRP3,PDCL2,CHRNA10,AIPL1,NR2<br>F6,GRK1,GRM6,CNGB1,GNAT1,OPN4,FECH,PRRXL1,SAG,ACCN1,GRIN2B,PDCL,CACNA1F,TCAP,RGR,CALCA,GJA10,MKKS,GRIN2<br>A,NR2E3,PGLYRP1,PKD2,RHO,PDC,OPN5,TLR4                                                                                                                                                                                                                                                                                                                                                                                                                                                                                                                                                                                                                                                                                  |
| GO:0050908             | 0.2582851 | 0.00    | 0   | 37              | detection of light stimulus involved in visual perception       | OPN1MW,PLEKHB1,GNAT2,GUCA1A,ABCA4,PLCB4,RCVRN,TRPC3,PDCL3,UNC119,OPN3,OPN1SW,TULP1,PITPNM1,GNGT2,RG<br>S9BP,PDE6B,PDE6D,GNB1,GUCA1B,TUB,PDCL2,AIPL1,GRK1,CNGB1,GNAT1,OPN4,SAG,ACCN1,PDCL,CACNA1F,RGR,GJA10,NR2<br>E3,RHO,PDC,OPN5                                                                                                                                                                                                                                                                                                                                                                                                                                                                                                                                                                                                                                                                                                                                                                                                                                                                                                                             |
| GO:0050974             | 0.4931055 | 0.00    | 0   | 16              | detection of mechanical stimulus involved in sensory perception | SLC12A2,ATP2B2,FYN,GRIN2D,GPR98,ACCN3,SOX2,CHRNA9,PCDH15,CDH23,MYC,CHRNA10,ACCN1,GRIN2B,MKKS,GRIN2A                                                                                                                                                                                                                                                                                                                                                                                                                                                                                                                                                                                                                                                                                                                                                                                                                                                                                                                                                                                                                                                           |
| GO:0006323             | 0.2834292 | 0.00    | 0   | 143             | DNA packaging                                                   | HIST1H4I,ASF1B,HIST3H2BB,HIST1H2BG,SET,HIST1H2BN,HMGB2,HIST1H1D,HIST1H3A,HIST1H2BM,HIST2H3B,HIST1H3G,NCA<br>PH,HIST2H4,NUSAP1,HIST1H2AN,H2AFV,SIRT2,ASF1A,NCAPG2,H1FNT,SMARCA5,HIST1H2AO,HIST1H2BL,HIST2H3C1,HIST1H4<br>H,HIST1H4D,NEFH,SIRT3,HIST1H2AF,H3F3B,HIST2H2AC,HIST1H2BF,1700024P04RIK,HIST2H2BB,HAT1,TMEM38B,NCAPH2,HIS<br>T1H1E,H2AFY,HIST2H2AA2,SEP15,HIST1H4F,HIST1H1B,HIST1H2BB,NAP1L3,HIST1H2BH,HIST2H2AA1,H3F3A,CENPA,AIFM2,H2<br>AFY2,PRM1,TOP2A,SMC2,PKN3,CHAF1B,HIST1H2BP,SIRT6,HIST1H1A,HELLS,NAP1L5,TSPYL4,RSF1,PRM3,HIST4H4,NCAPD3,HIS<br>T1H4J,DNMT3A,CHMP1A,SOS2,HIST1H4B,SUV39H1,AKAP8,MBD3,HIST1H2AK,H2AFZ,SMARCC1,TSPYL3,HIST1H4M,MYST4,AS<br>H1L,HIST1H2AA,NAP1L1,NCAPD2,HIST1H2BC,TSSK6,TSPYL2,1700113O17RIK,SMC4,HDAC5,HIST1H2AC,TNP1,POLS,SMARCA4,<br>NAP1L2,H1FO,STRA8,ARD1,CDC45,HIST2H2BE,AIFM1,HILS1,PRM2,1700054O13RIK,SHPRH,HIST3H2BA,SYCP3,SLC22A4,NCAP<br>G,HIST1H3D,CHAF1A,HIST1H2AB,HP1BP3,ACIN1,NAP1L4,SMARCA2,SIRT7,MYST3,HIST2H3C2,H2AFX,SIRT4,HIST3H2A,HIST1H<br>1T,H1FOO,TSPYL1,H2AFJ,MTA2,ENSMUSG00000074355,DFFB,SIRT1,H1FX,HIST1H1C,TSPYL5,DNMT3B,MCM2,HIST1H2BA,RO<br>CK2,PAM,CBX8,HIST1H3F,SIRT5,HIST1H2AE |
| GO:0042417             | 0.5473565 | 0.00    | 0   | 22              | dopamine metabolic process                                      | ATP7A,HTR2C,DRD2,HPRT1,CHRN2B,PARK2,TH,SLC6A3,DDC,COMT,SNCB,NPR1,DRD1A,DRD4,MAOA,TGFB2,DBH,GRIN2A,SNC<br>A,CHRNA7,NR4A2,SNCAIP                                                                                                                                                                                                                                                                                                                                                                                                                                                                                                                                                                                                                                                                                                                                                                                                                                                                                                                                                                                                                                |
| GO:0042756             | 1.0208784 | 0.00    | 0   | 11              | drinking behavior                                               | HRH3,APLN,AGTR1B,HTR1B,PMCH,ACE2,AGT,MIF,CYP11B2,AGTR1A,UCN                                                                                                                                                                                                                                                                                                                                                                                                                                                                                                                                                                                                                                                                                                                                                                                                                                                                                                                                                                                                                                                                                                   |
| GO:0007492             | 0.272353  | 0.00    | 0   | 20              | endoderm development                                            | ANGPT4,MIXL1,EXT1,LHX1,NKX2-<br>1,HDAC1,LAMC1,CTNNB1,HNF1B,BMPR1A,GATA6,ANKRD17,ANGPT2,NOTCH1,HOXC11,PAX9,ONECUT1,NCKAP1,ARC,ANGPT<br>1                                                                                                                                                                                                                                                                                                                                                                                                                                                                                                                                                                                                                                                                                                                                                                                                                                                                                                                                                                                                                       |
| GO:0008210             | 0.9095445 | 0.00    | 0   | 9               | estrogen metabolic process                                      | BMPR1B,SULT1E1,COMT,H2-KE6,HSD3B1,CYP19A1,HSD17B1,CYP1B1,RDH8                                                                                                                                                                                                                                                                                                                                                                                                                                                                                                                                                                                                                                                                                                                                                                                                                                                                                                                                                                                                                                                                                                 |

Table S2A. Gene sets up-regulated by mild stress plus morphine

| Gene Ontology category | Score     | p-value | FDR | Gene set length | Gene_set_description                                     | Gene_set_genes                                                                                                                                                                                                                                                                                                                                                                                                                                                                                                                                                                                                                                                                            |
|------------------------|-----------|---------|-----|-----------------|----------------------------------------------------------|-------------------------------------------------------------------------------------------------------------------------------------------------------------------------------------------------------------------------------------------------------------------------------------------------------------------------------------------------------------------------------------------------------------------------------------------------------------------------------------------------------------------------------------------------------------------------------------------------------------------------------------------------------------------------------------------|
| GO:0010458             | 0.6145452 | 0.00    | 0   | 13              | exit from mitosis                                        | UBE2C,CDC23,BIRC5,SIRT2,NPM2,MAD2L1BP,ZW10,NEUROG1,TGFB1,ANLN,PPP1R9B,KNTC1,CLASP1                                                                                                                                                                                                                                                                                                                                                                                                                                                                                                                                                                                                        |
| GO:0006635             | 0.5406062 | 0.00    | 0   | 28              | fatty acid beta-oxidation                                | DCI,ACOX2,ACADM,HADHA,HSD17B4,FRAP1,FABP3,PEX7,PPARD,PEX5,CPT2,ACOX3,EHHADH,ACADS,ACADSB,CPT1A,HADHB,ACOXL,MLYCD,CPT1B,ECHS1,ACOX1,ACADS,ACADVL,ECH1,BDH2,ADIPOQ,PPARA,FABP1                                                                                                                                                                                                                                                                                                                                                                                                                                                                                                              |
| GO:0009062             | 0.4892793 | 0.00    | 0   | 41              | fatty acid catabolic process                             | DCI,PHYH,ACOX2,ACADM,PEX13,HADHA,HSD17B4,FRAP1,FABP3,PEX7,PPARD,ABAT,PEX5,PCCB,ALDH5A1,CPT2,ACOX3,EHHA DH,ACADS,ACADSB,CPT1A,HADHB,PCCA,HAACL1,ACOT7,ACOXL,MLYCD,CPT1B,ECHS1,ACOX1,LEP,HAO1,ACADS,ACADVL,ECH1,BDH2,F AAH,ADIPOQ,PPARA,LYPLA3,CEL,FABP1                                                                                                                                                                                                                                                                                                                                                                                                                                    |
| GO:0019395             | 0.4625669 | 0.00    | 0   | 50              | fatty acid oxidation                                     | DCI,PHYH,ACOX2,ACADM,PEX13,PRKAA2,HADHA,ADIPOR1,SLC25A20,HSD17B4,FRAP1,FABP3,ACACB,PEX7,PPARD,ALOX12,PE X5,CPT2,ACOX3,EHHADH,ACADS,ACADSB,CPT1A,CD36,HADHB,GCDH,PRKAA1,HAACL1,PRKAB2,PPARGC1A,ADIPOR2,ACSL1,ACOXL,ML YCD,CPT1B,ECHS1,PRKAG2,ALOX15,MAPK14,PPARG,ACOX1,HAO1,ACADS,ACADVL,ECH1,BDH2,ADIPOQ,C1QTNF2,PPARA,ADH 7,FABP1                                                                                                                                                                                                                                                                                                                                                        |
| GO:0007631             | 0.393275  | 0.00    | 0   | 78              | feeding behavior                                         | HRH3,NPY,PEX13,GAL,TRH,NTRK2,HTR2C,IAPP,APLN,DRD2,POMC,AGTR1B,FYN,FOS,NKX2-1,CHRN2,HTR1B,PMCH,TH,GCG,CCKAR,MC4R,ACE2,AGT,HCRTR1,CRHR1,PRLHR,GHRL,APLP2,A,GLP1R,LEPR,NPY5R,DRD1A,C PT1A,CARTPT,DMBX1,MCHR1,AGRP,NMUR2,ADORA2A,CRHR2,MIF,BSX,PPYR1,CYP11B2,APP,HCRT,Uchl3,GHSR,STAT3,POU4 F1,GRM7,GALR2,Uchl1,ADM2,GALR3,PHF21A,AGTR1A,LEP,PYY,BDNF,GRIN2B,PRLH,GRIN1,NPW,CALCA,CCK,BRS3,CCKBR,NP Y2R,HCRTR2,CRH,FOSL2,UCN,NMU,NPY1R,NMB                                                                                                                                                                                                                                                    |
| GO:0007565             | 0.2319559 | 0.00    | 0   | 109             | female pregnancy                                         | IGFBP7,CR1L,SULT1E1,CITED2,SOSTDC1,PSG17,CUZD1,IGFBP2,PLEC1,PP11R,EPO,PLA2G4A,EPYC,HPGD,A2M,FOS,STAT5B,PAP PA,NODAL,IGF1,PPARD,HSPG2,CALD1,PSG19,RXRA,ADM,RLN1,OXTR,RPL29,AGT,COMT,GRN,PSG25,CRHR1,PRLHR,GHRL,SP1,OVGP1,FOSL1,LEPR,RAMP2,TRO,BSG,PRSS28,LNPEP,BYSL,BCL2,FKBP4,GNAS,LIPE,PRLR,PSG21,STX2,CEACAM12,IL1RN,MST1,F SHB,SP3,ARG1,GHSR,TPA,PZP,STAT5A,ADIPOR2,INDO,PSG26,CLICS,PRL,PRL8A2,LIF,TGFB2,PSG28,SOD1,MEN1,SCGB1A1,CO L16A1,TPBPA,HSF1,GNRH1,PTHLH,HMX3,CEACAM11,FBLN1,HFE,CALCA,KLF9,PSG18,HSD17B7,CEACAM9,FLT1,CRH,FOSL2,LA MB1-1,PCSK5,ADCYAP1,NAMPT,FCGRT,PSG23,AMBP,CRHBP,UCN,PLAU,EPOR,FOSB,THBD,JUNB,TEAD3,PGF,SFRP4                                             |
| GO:0006541             | 0.5935749 | 0.00    | 0   | 20              | glutamine metabolic process                              | PPAT,GGH,PDZD2,ASNSD1,CTPS2,CAD,ALDH5A1,GFPT1,GFPT2,GLS2,CTPS,GMPS,ASNS,LEMED1,GLS,CORO2A,GLULD1,PFAS,CPS 1,GLUL                                                                                                                                                                                                                                                                                                                                                                                                                                                                                                                                                                          |
| GO:0030252             | 0.606153  | 0.00    | 0   | 11              | growth hormone secretion                                 | PTPN11,GAL,GHRHR,DRD2,GHRL,GHRH,LTBP4,GHSR,KISS1,CACNA1C,SNAP25                                                                                                                                                                                                                                                                                                                                                                                                                                                                                                                                                                                                                           |
| GO:0030201             | 0.7262516 | 0.00    | 0   | 14              | heparan sulfate proteoglycan metabolic process           | SULF1,HS6ST1,GLCE,SGSH,EXT1,HS3ST5,NDST2,CSGALNACT1,HS3ST3B1,EXT2,HS2ST1,SULF2,NDST1,LIPC                                                                                                                                                                                                                                                                                                                                                                                                                                                                                                                                                                                                 |
| GO:0046483             | 0.2934345 | 0.00    | 0   | 113             | heterocycle metabolic process                            | PPAT,SUCLA2,INDOL1,PAICS,FOLR1,AK1,ATP7A,MTHFD2,ATP2B2,BLVRA,HPRT1,SHMT1,MTHFS,AK2,DNMT1,PEMT,ALAS2,LAC TB,DLD,ALAD,CDA,PRG3,GART,RSAD1,GIF,MTHFSD,MMAB,DDC,COMT,TYMP,CAD,HMBS,PNP1,2610209A20RIK,ALDH1L1,PPO X,P4HB,COX15,ALDH1L2,DHFR,HMOX1,UMPS,MAT2A,PIPOX,ICMT,AFMID,CYP1A1,HNF1A,MTHFR,NFE2L1,ALLC,DUS4L,DNMT 3A,GAMT,TPMT,LIAS,PCCA,MYO7B,PNMT,MAOA,FOLH1,DPYS,AANAT,MCCC1,PRPS1L1,ACMSD,ALAS1,GMPS,CPOX,TSPO,MTH FD1,ALDH6A1,CYB5R4,PRHOXNB,UROD,MAPK1,INDO,MTHFD1L,KMO,PRPS1,IRESB2,PCMT1,GNMT,DHODH,FECH,P4HA2,DPYD ,PHF11,CYP1B1,CYP1A2,MAT1A,TD02,MAT2B,PSG18,URO5,APRT,G6PC,TPH1,HEBP1,GRIN2A,HMOX2,FPGS,AADAT,FTCD,KYN U,MTR,TPH2,DNMT3B,COX10,AMBP,1190003J15RIK,P4HA1,UOX |
| GO:0006547             | 0.4455427 | 0.00    | 0   | 10              | histidine metabolic process                              | MOXD1,UROC1,HDC,FRRS1,HAL,MOXD2,MTHFD1,AMDHD1,DBH,FTCD                                                                                                                                                                                                                                                                                                                                                                                                                                                                                                                                                                                                                                    |
| GO:0009755             | 0.4031593 | 0.00    | 0   | 42              | hormone-mediated signaling                               | SGK1,PTPN11,LHCGR,GNB4,TRH,CUZD1,ADIPOR1,PRKAR2B,ADCY1,PRKAR2A,GCG,GNG5,PRKACB,GNG4,GHRL,PRKACA,A,AGR P,GNAS,GNG8,NUP62,ADCY8,JAK2,GNG13,GHR,GNB3,GCCR,GNB1,GNB2,GNG12,GHSR,JMJD1A,ADIPOR2,PRKAR1A,GNG3,GN G7,LATS2,PRKAR1B,GNG11,GNG10,GNG2,LATS1                                                                                                                                                                                                                                                                                                                                                                                                                                        |
| GO:0006972             | 0.9193548 | 0.00    | 0   | 9               | hyperosmotic response                                    | TRPV4,SLC12A2,RAC1,PKN1,SLC6A18,PDPK1,TLR3,AVPR1B,TRIP10                                                                                                                                                                                                                                                                                                                                                                                                                                                                                                                                                                                                                                  |
| GO:0019059             | 0.4131974 | 0.00    | 0   | 20              | initiation of viral infection                            | WWP1,PVRL1,PSIP1,CD81,HS3ST5,ACE2,XRCC5,CCR5,BANF1,WWP2,LIG4,HS3ST6,ITCH,CD4,HMGA1,PPIA,CXCR4,IFNB1,XRCC4 ,XRCC6                                                                                                                                                                                                                                                                                                                                                                                                                                                                                                                                                                          |
| GO:0007007             | 0.6644553 | 0.00    | 0   | 10              | inner mitochondrial membrane organization and biogenesis | FXC1,TIMM10,TIMM9,TAZ,TIMM8A2,TIMM8B,OPA1,BAX,TIMM13,TIMM8A1                                                                                                                                                                                                                                                                                                                                                                                                                                                                                                                                                                                                                              |
| GO:0051701             | 0.5686768 | 0.00    | 0   | 27              | interaction with host                                    | SMAD3,DERL1,WWP1,RRAGA,VAPB,PVRL1,TARBP2,HIPK2,CD81,HS3ST5,TLR2,ACE2,WWP2,TLR7,HS3ST6,ITCH,NOD2,TGFB1,T LR1,TLR3,C9,TLR9,INSR,ALB,TLR6,IFNB1,TLR4                                                                                                                                                                                                                                                                                                                                                                                                                                                                                                                                         |
| GO:0065002             | 0.2360068 | 0.00    | 0   | 69              | intracellular protein transport across a membrane        | TRAM2,NUP54,DDX19A,TIMM23,FXC1,TIMM10,SIL1,NUP43,TMEM48,PEX14,1500001M20RIK,TIMM9,TPR,1700034H14RIK,T OMM22,RRBP1,NUP107,NUP155,NUP160,TIMM8A2,RANBP17,TIMM8B,TIMM17B,NUP188,SEC61G,NUP62,TIMM50,NUP88, NUP98,XPO7,POM121,TIMM44,MVP,NUP85,TIMM17A,TIMM22,NUP35,ABRA,SERP2,NUP153,PEX6,D3UCLA1,SENPA2,NUP214 ,MAGMAS,GLE1,RANBP2,NUP133,TIMM13,TIMM8A1,NUP37,CHCHD4,ZMAT3,NUP50,TRAM1L1,DDX19B,NUP210,DNAJC19,S EH11,SEC61A2,NUP11,TRAM1,SEC61B,TKNS,SEC61A1,NUP93,NUPL2,SEC62,NUP205                                                                                                                                                                                                     |
| GO:0051668             | 0.5515398 | 0.00    | 0   | 15              | localization within membrane                             | SH3GLB1,MAL,CD2,CDH13,TMEM48,PMAIP1,COX18,REEP1,BAX,OXAL1,GRIN3B,EGFR,DOCK2,RTP1,RTP2                                                                                                                                                                                                                                                                                                                                                                                                                                                                                                                                                                                                     |

Table S2A. Gene sets up-regulated by mild stress plus morphine

| Gene Ontology category | Score     | p-value | FDR | Gene set length | Gene_set_description                                            | Gene_set_genes                                                                                                                                                                                                                                                                                                                                                                                                                                                                                                                                                                                                                                                                                                                                                                                                                                                                                                                                                                                                                                                                                                                                                                                                                                                            |
|------------------------|-----------|---------|-----|-----------------|-----------------------------------------------------------------|---------------------------------------------------------------------------------------------------------------------------------------------------------------------------------------------------------------------------------------------------------------------------------------------------------------------------------------------------------------------------------------------------------------------------------------------------------------------------------------------------------------------------------------------------------------------------------------------------------------------------------------------------------------------------------------------------------------------------------------------------------------------------------------------------------------------------------------------------------------------------------------------------------------------------------------------------------------------------------------------------------------------------------------------------------------------------------------------------------------------------------------------------------------------------------------------------------------------------------------------------------------------------|
| GO:0045185             | 0.3184419 | 0.00    | 0   | 39              | maintenance of protein location                                 | FAF1,TACC3,KDELRL1,TLN1,TLN2,SRGN,FLNB,PML,MDFI,GPA1,BBS4,TAF3,TMSB10,MXI1,GOPC,NR5A1,STOPORS,ANK3,NFKBIE,PDIA3,NFKBIL1,KDELRL3,TMSB4X,EZR,DMD,IL10,G3BP2,GYPA,PDIA2,MORC3,SHANK1,NFKBIA,SPNB4,GRIK5,SUFU,PEX5L,PFN1,BCL3,SUPT7L                                                                                                                                                                                                                                                                                                                                                                                                                                                                                                                                                                                                                                                                                                                                                                                                                                                                                                                                                                                                                                          |
| GO:0032507             | 0.3583818 | 0.00    | 0   | 34              | maintenance of protein location in cell                         | FAF1,TACC3,KDELRL1,TLN1,TLN2,FLNB,PML,MDFI,GPA1,BBS4,TAF3,MXI1,GOPC,NR5A1,STOPORS,ANK3,NFKBIE,PDIA3,NFKBIL1,KDELRL3,EZR,DMD,IL10,G3BP2,GYPA,PDIA2,MORC3,SHANK1,NFKBIA,SPNB4,GRIK5,SUFU,BCL3,SUPT7L                                                                                                                                                                                                                                                                                                                                                                                                                                                                                                                                                                                                                                                                                                                                                                                                                                                                                                                                                                                                                                                                        |
| GO:0000226             | 0.2356377 | 0.00    | 0   | 131             | microtubule cytoskeleton organization and biogenesis            | UBE2C,DOCK7,SGK1,TACC3,CKS2,BRCA1,STMN3,DYNC1L1,MARK1,CRYAB,UBE2B,RANBP1,MTAP1A,CNP,KIF2C,NUSAP1,BIRC5,UXT,SMC3,TTK,RNF19A,TUBB1,NDC80,NEFH,TEKT2,ESPL1,TUBGCP5,BBS4,PPP4C,PCM1,DST,PRC1,MAP6D1,CKAP5,CNTROB,NEFL,CETN3,HOOK2,HOOK1,TUBA8,GTRGEO22,UNC84B,TUBGCP2,PAFAH1B1,KIF11,KIF23,TTL,NPM1,CENPJ,ZWINT,AURKA,S,TMN1,CLASP2,MTAP1B,BBS2,TEKT3,TEKT4,BUB1B,CROCC,FBXO5,TBCE,CDC42BPA,MAPRE1,HDAC6,TUBGCP4,FMN2,BRCA2,D,CTN2,GADD45A,TRIM54,NEFM,DYNC1H1,KATNB1,TUBB5,TACC1,CDKN1B,RCC1,OFD1,TUBGCP3,AP1G1,GABARAP,MTAP2,MLH1,TUBGCP6,MID1P1,BBS1,NAV1,RAN,CETN1,TEKTS,MYH9,TUBE1,RANBP9,MID1,SAC3D1,ASZ1,CAV1,KATNA1,NDE1,CCDC100,TPX2,SASS6,HOOK3,TEKT1,NDEL1,1700009N14RIK,TUBG1,PRKCZ,MARK4,CFTR,SPAG5,MTAP4,TPPP,CEP250,SMC1A,MTAP1S,APC,PTK2,PCNT,NEURL,MAPK8,TACC2,CAV2,ARHGFE2,CTTNBP2,PSRC1,CLIP2,CAV3,MAPT,CLASP1,WNT2                                                                                                                                                                                                                                                                                                                                                                                                                                        |
| GO:0006839             | 0.2919546 | 0.00    | 0   | 62              | mitochondrial transport                                         | MTX2,TIMM23,VDAC1,FXC1,TOMM40,TIMM10,SLC25A32,SLC25A20,SLC25A10,TIMM9,SLC25A17,TOMM22,SLC25A24,SLC25A37,HSPD1,BAK1,SLC25A36,KIF5B,UCP2,CPT2,TOMM20,TIMM8A2,TIMM8B,TIMM17B,SLC25A13,SLC25A12,SLC25A4,SLC25A27,SLC37A2,UCP3,BCL2,IMMP2L,TIMM44,TIMM17A,SLC25A30,MFN2,TSPO,TRNT1,PMPCB,YWHAZ,TIMM13,UCP1,TIMM8A1,BNIP3,BCL2L1,CPT1B,SLC25A14,HSP90AA1,BHLHB8,HTT,GRPEL1,SLC25A15,SLC25A1,DNAJC19,MIEPE,PLEKHF1,AIP,PSEN1,SLC25A2,STAR3,SLC1A3,TOMM34                                                                                                                                                                                                                                                                                                                                                                                                                                                                                                                                                                                                                                                                                                                                                                                                                         |
| GO:0007005             | 0.2742801 | 0.00    | 0   | 133             | mitochondrion organization and biogenesis                       | SH3GLB1,MTX2,NDUFS5,TIMM23,VDAC1,FXC1,SOD2,TOMM40,NDUFS8,MRPL15,SEPT4,ATP7A,TIMM10,GPX1,CASP7,SLC25A32,NRF1,MSTO1,SLC25A20,DNM1L,TFAM,SLC25A10,TIMM9,TAZ,PEX5,SLC25A17,TOMM22,SLC25A24,FIS1,SLC25A37,HSPD1,MFN1,DCTN6,TYMP,BAK1,SLC25A36,KIF5B,UCP2,SFN,PMAIP1,CPT2,AIFM2,TOMM20,TIMM8A2,POLG,TIMM8B,TIMM17B,MRPL39,SLC25A13,SLC25A12,SLC25A4,SLC25A27,COX18,FXN,MAN2A1,SLC37A2,UCP3,SLC22A5,MAP3K1,BCL2,IMMP2L,DNAJA3,TIMM50,OPA1,TIMM44,NDUFS4,TIMM17A,RNF7,SLC25A30,BAX,BID,PPARGC1A,CXADR,MFN2,POLRMT,TSPO,LONP1,1700020C11RIK,AKT1,TRNT1,MRPL12,MYC,NDUFS7,PMPCB,YWHAZ,AIFM1,CASP3,TRP73,RAB3A,TIMM13,UCP1,TIMM8A1,TFB2M,HTRA2,BNIP3,SPG7,BCL2L1,CPT1B,MTERF,SLC25A14,HSP90AA1,BHLHB8,CLN8,DAP3,HTT,GRPEL1,SLC25A15,TRP53,SLC25A1,JUN,DNAJC19,MIEPE,PLEKHF1,MUL1,AIP,EPAS1,CSTAD,CCK,PSEN1,SLC25A2,CAV2,MPV17,STAR3,SLC1A3,TOMM34,CD24A,MRPL17,COX10,RRM2B,PIM2,CDKN2A,BBC3,CEBPA                                                                                                                                                                                                                                                                                                                                                                                    |
| GO:0000278             | 0.0961384 | 0.00    | 0   | 421             | mitotic cell cycle                                              | UBE2C,PKMYT1,CCNA2,KIF22,CABLES1,DCLRE1A,DBF4,PSMC6,AURKB,SMAD3,EDN1,CCDC5,PAPD5,MAD2L1,1110001A07RIK,BLM,YEATS4,PMF1,PSME2,CDCA8,MPHOSPH6,PSMB7,CDC16,PSMB6,DYNC1L1,E2F5,TPD52L1,BCAT1,ANAPC13,NBN,TIPIN,RPS6KA2,CDC23,E2F6,RAD21,KPNA2,NUF2,CD2AP,MAEA,NCAPH,MYO16,TUBB3,RNF8,KIF2C,FRAP1,CCNE1,NUSAP1,PLK1,BIRC5,STAT5B,SIRT2,SMC3,UBE2E1,CCNB1,PML,TTK,ASPM,CCNB2,NCAPG2,CDK3,CDC20,H1FNT,4922501C03RIK,CENPF,CIT,MAD1L1,IGF1,ID4,NDC80,KHDRBS1,CAMK2D,ESPL1,ITGB1,HMGA2,NEDD9,NCAPH2,PRC1,KIF15,MAPRE2,BUB1,NUDC,RPRM,HUS1,NPM2,UBA3,PSMD9,GPR132,PRKCQ,CCND1,ZWILCH,PSMA4,PSMB2,GML,PSMA6,CETN3,TIMELESS,PRM1,ANAPC7,SMC2,E2F1,POLA1,UBB,FOSL1,PSMD7,CDKN1C,PSMC4,SHC1,PSMD5,CDKN2D,UNC84B,6720463M24RIK,CUL3,EML4,PSMB4,PSMA3,ANAPC11,HELLS,PAFAH1B1,PSME3,PSMF1,ANAPC5,KIF11,DNAJC2,RNF2,CDKN1A,KIF23,PRM3,CCNG1,TCF3,RAD17,CDC2A,CDK2AP1,CAMK2G,SUGT1,CDKN2C,ANP32B,SLFN1,RBM38,PSMB9,BTG3,FOXN3,CUL2,DLG7,CDK4,MAD2L1BP,NEK1,ZW10,SKP1A,BCL2,NCAPD3,CDC25A,ZWINT,TERF1,CHMP1A,AURKA,KIF2B,STMN1,CDC27,CLASP2,TUBB2B,ABL1,AKAP8,WEE1,PSMD12,BUB1B,PSMD6,FBXO5,FSD1,MAPRE1,CCNA1,UBE2I,AURKAIP1,BRCA2,SNF1LK,ANAPC4,ZZEF1,PSME1,CDKN2B,GADD45A,SPC24,DYNC1H1,FOXK1,TNF,NCAPD2,PDS5A,KATNB1,PTTG1,KIF3B,TCFE2A,CDC34,ERCC6L,PARC,SETD8,CDKN1B,NEUROG1,PIN1,RCY1,BL |
| GO:0006044             | 0.2235605 | 0.00    | 0   | 28              | N-acetylglucosamine metabolic process                           | SLC35A3,CHIA,B4GALNT2,GNPDA2,EXTL2,HEXB,GNPAT1,OVGP1,DPAGT1,GFPT1,CHID1,GNE,CHIT1,GNPDA1,CHST5,CHST2,C                                                                                                                                                                                                                                                                                                                                                                                                                                                                                                                                                                                                                                                                                                                                                                                                                                                                                                                                                                                                                                                                                                                                                                    |
| GO:0030147             | 0.5856373 | 0.00    | 0   | 10              | natriuresis                                                     | TBS,PGM3,AMDHD2,CHI3L3,CHST4,CHI3L1,RENBP,UAP1,CHI3L4,CHST7,LARGE,NAGK                                                                                                                                                                                                                                                                                                                                                                                                                                                                                                                                                                                                                                                                                                                                                                                                                                                                                                                                                                                                                                                                                                                                                                                                    |
| GO:0032387             | 0.2986525 | 0.00    | 0   | 21              | negative regulation of intracellular transport                  | EDN1,DRD2,AGT,NPR1,AGTR2,LNPEP,ADORA2A,NPPB,KNG1,ADORA1                                                                                                                                                                                                                                                                                                                                                                                                                                                                                                                                                                                                                                                                                                                                                                                                                                                                                                                                                                                                                                                                                                                                                                                                                   |
| GO:0042992             | 0.4834805 | 0.00    | 0   | 13              | negative regulation of transcription factor import into nucleus | FAF1,TACC3,CRYAB,NLRP3,MDFI,MXI1,GOPC,CDK5,NFKBIE,PKIA,NF1,UACA,NFKBIL1,IL10,G3BP2,BARD1,NFKBIA,SUFU,CRYAA,PKIG,HNF4A                                                                                                                                                                                                                                                                                                                                                                                                                                                                                                                                                                                                                                                                                                                                                                                                                                                                                                                                                                                                                                                                                                                                                     |
| GO:0009112             | 0.5816332 | 0.00    | 0   | 23              | nucleobase metabolic process                                    | FAF1,TACC3,NLRP3,MDFI,MXI1,NFKBIE,NF1,UACA,NFKBIL1,IL10,G3BP2,NFKBIA,SUFU                                                                                                                                                                                                                                                                                                                                                                                                                                                                                                                                                                                                                                                                                                                                                                                                                                                                                                                                                                                                                                                                                                                                                                                                 |
|                        |           |         |     |                 |                                                                 | PPAT,PAICS,AK1,HPRT1,SHMT1,AK2,CDA,GART,TYMP,CAD,UMPS,DPYS,PRPS1L1,GMPS,ALDH6A1,PRHOXNB,MAPK1,PRPS1,DHODH,DPYD,APRT,1190003J15RIK,UOX                                                                                                                                                                                                                                                                                                                                                                                                                                                                                                                                                                                                                                                                                                                                                                                                                                                                                                                                                                                                                                                                                                                                     |



Table S2A. Gene sets up-regulated by mild stress plus morphine

| Gene Ontology category | Score     | p-value | FDR | Gene set length | Gene set description                                    | Gene set genes                                                                                                                                                                                                                                                                                                                                                                                                                                                                                                                                                                                                                                                                                                                                                                                                                                                                                                                                                                                                                                                                                                                                                                                                                                                                                                               |
|------------------------|-----------|---------|-----|-----------------|---------------------------------------------------------|------------------------------------------------------------------------------------------------------------------------------------------------------------------------------------------------------------------------------------------------------------------------------------------------------------------------------------------------------------------------------------------------------------------------------------------------------------------------------------------------------------------------------------------------------------------------------------------------------------------------------------------------------------------------------------------------------------------------------------------------------------------------------------------------------------------------------------------------------------------------------------------------------------------------------------------------------------------------------------------------------------------------------------------------------------------------------------------------------------------------------------------------------------------------------------------------------------------------------------------------------------------------------------------------------------------------------|
| GO:0055086             | 0.0958078 | 0.00    | 0   | 269             | nucleobase, nucleoside and nucleotide metabolic process | PPAT,ATP5F1,NUDT5,EDN1,NT5M,PAICS,RRM1,AK1,ERH,GUCA1A,ATP7A,GHRHR,RRM2,UPP1,ADSSL1,ATP2B2,LDHB,ADSL,DCXR,PDE4A,ENTPD3,FIGNL1,HPRT1,SHMT1,CNP,ATP5J2,RXFP2,INSL3,MYH7,PRPS2,AK2,RORA,MDH1,MYH6,MUTYH,ITPA,ADCY5,PGD,DUT,ENPP5,CDA,RP2H,ADCY1,ATP6V0B,HIBADH,ATP5G1,PDE4D,LDHD,GART,H6PD,ABCA1,ADM,ATP5G2,NME5,CTPS2,NUDT7,NPPA,ATP5G3,ADCY7,TYMP,CAD,PNP1,ATP5A1,ATP5C1,ATP5J,NPR1,ADCY2,RBM3,NT5C2,ENPP3,ATP5L,GUCY1A3,ATP5D,UPP2,SLC25A13,NT5C,DHFR,DRD1A,GUCY1B3,GUCY2F,UMPS,NUDT1,AFMID,NUDT4,MYO9B,NMNAT2,GRM8,MSH2,NME4,PDE8A,ENTPD8,TPI1,ADORA2A,PAPSS1,ATP5H,ADCY6,ATP6AP1,ENPP1,ATP6V1F,PNKP,NT5C1B,NME1,PGLS,DTYMK,ARRB1,CMPK1,APOE,NDUFS1,ADCY8,ATP5B,CTPS,GUK1,CACNB4,AMPD3,NT5C3,QPRT,GHRH,DPYS,RP1H,PRPS1L1,IMPDH1,ACMSD,DCK,ATP5O,NCF2,TKT,PDE5A,GUCY1A2,GMPS,ATP6V0C,DRD5,TGFB1,NT5C3L,NUDT3,IMPDH2,ND4L,MTHFD1,ATP1A1,ATP5E,RDH14,GMPR2,NPPB,ALDH6A1,PRHOXNB,ADCY3,ERCC3,ADCY10,DCTD,NT5E,NMNAT1,NAPRT1,ATPIF1,MAPK1,TIMP2,NME7,GUCY2E,ADSS,NME6,CANT1,NPPC,G6PDX,GUCY2C,INDO,ACLY,DGUOK,NUDT9,0610012D14RIK,ATP6V1A,HAOA,SMUG1,NTHL1,ATP6V1B1,AVP,NT5C1A,ENTPD4,NADSYN1,GCK,PRPSAP1,AIPL1,PDE8B,KMO,MPG,FHIT,ADA,PRPS1,CCNO,RP1A,DHODH,TBPL1,HSD11B1,GUCY1B2,SMARCA1,APOBEC1,GMPR,ATP6V1B2,DECR2,DPYD,GUCY2D,ADCY9,OLA1,ATIC,PTH2,DERA,ADK,PTHLH,BC016495,NME2,PRPSAP2,NADK,ABCC6,TDO2,TXNDC3,ATP6V0D2,CTNS |
| GO:0006753             | 0.1142313 | 0.00    | 0   | 252             | nucleoside phosphate metabolic process                  | PPAT,ATP5F1,NUDT5,EDN1,NT5M,PAICS,RRM1,AK1,GUCA1A,ATP7A,GHRHR,RRM2,UPP1,ADSSL1,ATP2B2,LDHB,ADSL,DCXR,PDE4A,ENTPD3,FIGNL1,HPRT1,CNP,ATP5J2,RXFP2,INSL3,MYH7,PRPS2,RORA,MDH1,MYH6,MUTYH,ITPA,ADCY5,PGD,DUT,ENPP5,CDA,RP2H,ADCY1,ATP6V0B,HIBADH,ATP5G1,PDE4D,LDHD,GART,H6PD,ABCA1,ADM,ATP5G2,NME5,CTPS2,NUDT7,NPPA,ATP5G3,ADCY7,TYMP,CAD,PNP1,ATP5A1,ATP5C1,ATP5J,NPR1,ADCY2,RBM3,NT5C2,ENPP3,ATP5L,GUCY1A3,ATP5D,UPP2,SLC25A13,NT5C,DHFR,DRD1A,GUCY1B3,GUCY2F,UMPS,NUDT1,AFMID,NUDT4,MYO9B,NMNAT2,GRM8,MSH2,NME4,PDE8A,ENTPD8,TPI1,ADORA2A,PAPSS1,ATP5H,ADCY6,ATP6AP1,ENPP1,ATP6V1F,PNKP,NT5C1B,NME1,PGLS,DTYMK,ARRB1,CMPK1,APOE,NDUFS1,ADCY8,ATP5B,CTPS,GUK1,CACNB4,AMPD3,NT5C3,QPRT,GHRH,RP1H,PRPS1L1,IMPDH1,ACMSD,DCK,ATP5O,NCF2,TKT,PDE5A,GUCY1A2,GMPS,ATP6V0C,DRD5,TGFB1,NT5C3L,IMPDH2,ND4L,MTHFD1,ATP1A1,ATP5E,RDH14,GMPR2,NPPB,ADCY3,ERCC3,ADCY10,DCTD,NT5E,NMNAT1,NAPRT1,ATPIF1,TIMP2,NME7,GUCY2E,ADSS,NME6,CANT1,NPPC,G6PDX,GUCY2C,INDO,ACLY,DGUOK,NUDT9,0610012D14RIK,ATP6V1A,HAOA,SMUG1,NTHL1,ATP6V1B1,AVP,NT5C1A,ENTPD4,NADSYN1,GCK,PRPSAP1,AIPL1,PDE8B,KMO,MPG,FHIT,ADA,PRPS1,CCNO,RP1A,DHODH,TBPL1,HSD11B1,GUCY1B2,SMARCA1,GMPR,ATP6V1B2,DECR2,GUCY2D,ADCY9,OLA1,ATIC,PTH2,DERA,ADK,PTHLH,BC016495,NME2,PRPSAP2,NADK,ABCC6,TDO2,TXNDC3,ATP6V0D2,CTNS                                                             |
| GO:0006334             | 0.4306467 | 0.00    | 0   | 94              | nucleosome assembly                                     | HIST1H4I,ASF1B,HIST3H2BB,HIST1H2BG,SET,HIST1H2BN,HMGB2,HIST1H1D,HIST1H3A,HIST1H2BM,HIST2H3B,HIST1H3G,HIST2H4,HIST1H2AN,H2AFV,ASF1A,SMARCA5,HIST1H2AO,HIST1H2BL,HIST2H3C1,HIST1H4H,HIST1H4D,NEFH,HIST1H2AF,H3F3B,HIST2H2AC,HIST1H2BF,1700024P04RIK,HIST2H2BB,MTMEM38B,HIST1H1E,H2AFY,HIST2H2AA2,HIST1H4F,HIST1H1B,HIST1H2BB,NAP1L3,HIST1H2BH,HIST2H2AA1,H3F3A,CENPA,H2AFY2,PKN3,CHAF1B,HIST1H2BP,HIST1H1A,NAP1L5,TSPYL4,RSF1,HIST4H4,HIST1H4J,SOS2,HIST1H4B,HIST1H2AK,H2AFZ,TSPYL3,HIST1H4M,MYST4,HIST1H2AA,NAP1L1,HIST1H2BC,TSPYL2,1700113O17RIK,HIST1H2AC,SMARCA4,NAP1L2,H1FO,HIST2H2BE,HILS1,1700054O13RIK,SHPRH,HIST3H2BA,SLC22A4,HIST1H3D,CHAF1A,HIST1H2AB,HP1BP3,NAP1L4,SMARCA2,MYST3,HIST2H3C2,H2AFX,HIST3H2A,HIST1H1T,H1FOO,TSPYL1,H2AFJ,H1FX,HIST1H1C,TSPYL5,MCM2,HIST1H2BA,HIST1H3F,HIST1H2AE                                                                                                                                                                                                                                                                                                                                                                                                                                                                                                                       |
| GO:0009117             | 0.1142313 | 0.00    | 0   | 252             | nucleotide metabolic process                            | PPAT,ATP5F1,NUDT5,EDN1,NT5M,PAICS,RRM1,AK1,GUCA1A,ATP7A,GHRHR,RRM2,UPP1,ADSSL1,ATP2B2,LDHB,ADSL,DCXR,PDE4A,ENTPD3,FIGNL1,HPRT1,CNP,ATP5J2,RXFP2,INSL3,MYH7,PRPS2,RORA,MDH1,MYH6,MUTYH,ITPA,ADCY5,PGD,DUT,ENPP5,CDA,RP2H,ADCY1,ATP6V0B,HIBADH,ATP5G1,PDE4D,LDHD,GART,H6PD,ABCA1,ADM,ATP5G2,NME5,CTPS2,NUDT7,NPPA,ATP5G3,ADCY7,TYMP,CAD,PNP1,ATP5A1,ATP5C1,ATP5J,NPR1,ADCY2,RBM3,NT5C2,ENPP3,ATP5L,GUCY1A3,ATP5D,UPP2,SLC25A13,NT5C,DHFR,DRD1A,GUCY1B3,GUCY2F,UMPS,NUDT1,AFMID,NUDT4,MYO9B,NMNAT2,GRM8,MSH2,NME4,PDE8A,ENTPD8,TPI1,ADORA2A,PAPSS1,ATP5H,ADCY6,ATP6AP1,ENPP1,ATP6V1F,PNKP,NT5C1B,NME1,PGLS,DTYMK,ARRB1,CMPK1,APOE,NDUFS1,ADCY8,ATP5B,CTPS,GUK1,CACNB4,AMPD3,NT5C3,QPRT,GHRH,RP1H,PRPS1L1,IMPDH1,ACMSD,DCK,ATP5O,NCF2,TKT,PDE5A,GUCY1A2,GMPS,ATP6V0C,DRD5,TGFB1,NT5C3L,IMPDH2,ND4L,MTHFD1,ATP1A1,ATP5E,RDH14,GMPR2,NPPB,ADCY3,ERCC3,ADCY10,DCTD,NT5E,NMNAT1,NAPRT1,ATPIF1,TIMP2,NME7,GUCY2E,ADSS,NME6,CANT1,NPPC,G6PDX,GUCY2C,INDO,ACLY,DGUOK,NUDT9,0610012D14RIK,ATP6V1A,HAOA,SMUG1,NTHL1,ATP6V1B1,AVP,NT5C1A,ENTPD4,NADSYN1,GCK,PRPSAP1,AIPL1,PDE8B,KMO,MPG,FHIT,ADA,PRPS1,CCNO,RP1A,DHODH,TBPL1,HSD11B1,GUCY1B2,SMARCA1,GMPR,ATP6V1B2,DECR2,GUCY2D,ADCY9,OLA1,ATIC,PTH2,DERA,ADK,PTHLH,BC016495,NME2,PRPSAP2,NADK,ABCC6,TDO2,TXNDC3,ATP6V0D2,CTNS                                                             |
| GO:0006297             | 0.564268  | 0.00    | 0   | 17              | nucleotide-excision repair, DNA gap filling             | POLD3,RFC2,PCNA,RFC3,POLD2,RFC5,RPA3,RFC4,LIG4,RFC1,LIG1,POLE,RPA2,POLE2,POLD1,RPA1,POLD4                                                                                                                                                                                                                                                                                                                                                                                                                                                                                                                                                                                                                                                                                                                                                                                                                                                                                                                                                                                                                                                                                                                                                                                                                                    |
| GO:0031100             | 0.6251344 | 0.00    | 0   | 29              | organ regeneration                                      | CCNA2,GAS6,APOA2,LIFR,HTR2C,CCNE1,HSPG2,ADM,CCND1,LRP2,SHC1,AXL,CDKN1A,CDK4,PHB,APOH,PTPRU,CDK2,LPIN1,LIFR,APOA1,AHSG,TEK,ATIC,AFP,NR4A3,HP,ANGPT1,CEBPA                                                                                                                                                                                                                                                                                                                                                                                                                                                                                                                                                                                                                                                                                                                                                                                                                                                                                                                                                                                                                                                                                                                                                                     |
| GO:0001542             | 0.3385184 | 0.00    | 0   | 17              | ovulation from ovarian follicle                         | PLA2G4A,MMP2,FOXO3A,EDN2,OAS1D,AGT,ADAMTS1,NOS3,LEPR,MMP19,LEP,AFP,NR1P1,CBR1,SIRT1,NOS2,PGR                                                                                                                                                                                                                                                                                                                                                                                                                                                                                                                                                                                                                                                                                                                                                                                                                                                                                                                                                                                                                                                                                                                                                                                                                                 |
| GO:0014065             | 0.6251492 | 0.00    | 0   | 11              | phosphoinositide 3-kinase cascade                       | EDN1,IGF1,PPARD,KDR,ERBB3,INS2,ERBB2,CAT,NF1,IGF1R,TSC2                                                                                                                                                                                                                                                                                                                                                                                                                                                                                                                                                                                                                                                                                                                                                                                                                                                                                                                                                                                                                                                                                                                                                                                                                                                                      |
| GO:0015914             | 0.6822411 | 0.00    | 0   | 31              | phospholipid transport                                  | NPC2,APOC1,APOA2,ATP11C,ABCA4,ATP11A,ATP10D,ABCG8,ABCA1,ATP8B3,ABCG1,ATP8A2,APOC2,4930417M19RIK,APOA4,ATP11B,PITPNA,APOE,ATP10B,ATP9A,ATP8B2,APOC3,ATP8B4,ATP8B1,APOA1,PCTP,ATP10A,P2RX7,PLSCR1,ATP8A1,ATP9B                                                                                                                                                                                                                                                                                                                                                                                                                                                                                                                                                                                                                                                                                                                                                                                                                                                                                                                                                                                                                                                                                                                 |

Table S2A. Gene sets up-regulated by mild stress plus morphine

| Gene Ontology category | Score     | p-value | FDR | Gene set length | Gene_set_description                                            | Gene_set_genes                                                                                                                                                                                                                                                                                                                                                                                                                                                                                                                                                                                                                            |
|------------------------|-----------|---------|-----|-----------------|-----------------------------------------------------------------|-------------------------------------------------------------------------------------------------------------------------------------------------------------------------------------------------------------------------------------------------------------------------------------------------------------------------------------------------------------------------------------------------------------------------------------------------------------------------------------------------------------------------------------------------------------------------------------------------------------------------------------------|
| GO:0007602             | 0.3091257 | 0.00    | 0   | 34              | phototransduction                                               | OPN1MW,PLEKHB1,GNAT2,GUCA1A,ABCA4,PLCB4,RCVRN,TRPC3,PDCL3,UNC119,OPN3,OPN1SW,TULP1,PITPNM1,GNNGT2,PD E6B,PDE6D,GNB1,GUCA1B,TUB,PDCL2,AIPL1,GRK1,CNGB1,GNAT1,OPN4,SAG,ACCN1,PDCL,RGR,NR2E3,RHO,PDC,OPN5                                                                                                                                                                                                                                                                                                                                                                                                                                    |
| GO:0046148             | 0.3980255 | 0.00    | 0   | 36              | pigment biosynthetic process                                    | PPAT,PAICS,GPR143,SHMT1,ALAS2,ALAD,GART,SOX2,SI,HMBS,PPOX,TYRP1,A,OCA2,COX15,DDT,HNF1A,NFE2L1,AP3D1,SLC45 A2,TYR,MYO5A,ALAS1,GMPS,IDI2,CPOX,TSPO,MC1R,UROD,IREB2,FECH,4833409A17RIK,UROS,IDI1,DCT,COX10                                                                                                                                                                                                                                                                                                                                                                                                                                   |
| GO:0042440             | 0.3300048 | 0.00    | 0   | 43              | pigment metabolic process                                       | PPAT,PAICS,GPR143,BLVRA,SHMT1,ALAS2,ALAD,GART,SOX2,SI,HMBS,PPOX,TYRP1,A,OCA2,COX15,HMOX1,DDT,HNF1A,NFE2L 1,BCL2,AP3D1,SLC45A2,TYR,MYO5A,ALAS1,GMPS,IDI2,CPOX,TSPO,CYB5R4,MC1R,UROD,IREB2,FECH,4833409A17RIK,UROS,I DI1,HEBP1,HMOX2,DCT,COX10,AMBP                                                                                                                                                                                                                                                                                                                                                                                         |
| GO:0006596             | 0.4817107 | 0.00    | 0   | 8               | polyamine biosynthetic process                                  | ADC,GM853,OAZ1,ODC1,AZIN1,AMD1,SRM,AGMAT                                                                                                                                                                                                                                                                                                                                                                                                                                                                                                                                                                                                  |
| GO:0006779             | 0.4198916 | 0.00    | 0   | 18              | porphyrin biosynthetic process                                  | SUCLA2,ALAS2,ALAD,RSAD1,MMAB,HMBS,PPOX,COX15,HNF1A,NFE2L1,ALAS1,CPOX,TSPO,UROD,IREB2,FECH,UROS,COX10                                                                                                                                                                                                                                                                                                                                                                                                                                                                                                                                      |
| GO:0045840             | 0.3570086 | 0.00    | 0   | 20              | positive regulation of mitosis                                  | UBE2C,EDN1,NUSAP1,BIRC5,IGF1,ESPL1,SHC1,TNF,NEUROG1,TGFB1,BTC,LTA,TGFA,EREG,FGF8,EPGN,HOXA13,CD28,EDN3,EG F                                                                                                                                                                                                                                                                                                                                                                                                                                                                                                                               |
| GO:0045669             | 0.3877688 | 0.00    | 0   | 24              | positive regulation of osteoblast differentiation               | BMPR1B,BMP6,BMP2,BMP7,IGF1,SMAD1,SMAD5,CTNNB1,ACVR2B,DLX5,BMP4,GNAS,BMPR1A,RUNX2,NPPC,MEN1,BMPR2,J UND,PDLIM7,ACVR1,IFI204,ACVR2A,CD276,WNT7B                                                                                                                                                                                                                                                                                                                                                                                                                                                                                             |
| GO:0034105             | 0.463856  | 0.00    | 0   | 23              | positive regulation of tissue remodeling                        | BMPR1B,BMP6,KL,BMP2,PLA2G4A,BMP7,MC4R,CAR2,ACVR2B,BMP4,BMPR1A,TNFSF11,RUNX2,ADRB2,BMPR2,AHSG,P2RX7, CALCA,ACVR1,ACVR2A,SPP1,CD276,THRB                                                                                                                                                                                                                                                                                                                                                                                                                                                                                                    |
| GO:0042993             | 0.3671963 | 0.00    | 0   | 11              | positive regulation of transcription factor import into nucleus | SMAD3,EDA,TNFSF14,PRKCC,RHOA,CD27,TNF,TRIP6,CDH1,FLNA,EDAR                                                                                                                                                                                                                                                                                                                                                                                                                                                                                                                                                                                |
| GO:0045039             | 0.8500958 | 0.00    | 0   | 7               | protein import into mitochondrial inner membrane                | FXC1,TIMM10,TIMM9,TIMM8A2,TIMM8B,TIMM13,TIMM8A1                                                                                                                                                                                                                                                                                                                                                                                                                                                                                                                                                                                           |
| GO:0043681             | 0.4906774 | 0.00    | 0   | 13              | protein import into mitochondrion                               | FXC1,TIMM10,TIMM9,TOMM22,HSPD1,TOMM20,TIMM8A2,TIMM8B,TIMM13,TIMM8A1,GRPEL1,DNAJC19,AIP                                                                                                                                                                                                                                                                                                                                                                                                                                                                                                                                                    |
| GO:0045047             | 1.2491202 | 0.00    | 0   | 9               | protein targeting to ER                                         | SRPR,FOLR1,SRP9,MACF1,FOLR2,SRP19,VCAN,SRP14,SRP72                                                                                                                                                                                                                                                                                                                                                                                                                                                                                                                                                                                        |
| GO:0006625             | 0.6180333 | 0.00    | 0   | 13              | protein targeting to peroxisome                                 | PEX13,PEX14,PEX3,PEX7,AGXT,PEX19,PEX5,PEX26,PEX1,PEX6,PEX10,PEX16,PEX12                                                                                                                                                                                                                                                                                                                                                                                                                                                                                                                                                                   |
| GO:0016567             | 0.1452386 | 0.00    | 0   | 102             | protein ubiquitination                                          | UBE2C,BRCA1,RNF217,WWP1,SIAH2,HERC5,BCL10,SUZ12,UBE2N,NSMCE2,PRPF19,FBXO3,FBXO32,GCLC,SMURF1,STUB1,KC MF1,PARK2,CAND1,RPS27A,PCNP,FBXL5,RBBP6,UBB,SAE1,HUWE1,UBE2V2,RNF11,ANAPC11,TSC1,RNF2,LNX1,FBXL21,TSPAN 17,CDK5,TRIM23,UBE2G1,FBXO9,RNF144B,MAP3K1,BCL2,MGRN1,RBX1,RNF139,FGFR3,ATG3,TRIP12,HDAC6,SUMF1,FBXL3, WDSUB1,GTPBP4,UBE4A,VCP,UBE2V1,NOSIP,DZIP3,BIRC6,RFFL,RING1,ERCC8,AKT1,SIAH1A,UBE4B,CUL5,LRRK2,FBXO4,MDM 2,GSPT1,VHLH,TSG101,SOC5,DDDB2,FBXO11,UBQLN1,UBOX5,UHRF2,TRAF7,FBXW7,UBE3C,BARD1,AMFR,UBE2D1,MIB2,FBX O24,MUL1,LMO7,PPIL2,TRAF6,FBXW11,FBXO10,NEDD4L,CBL,ATG7,FBXO25,CHFR,BMI1,NHLRC1,MYLIP,ATG5,RAB26,CBX8 |
| GO:0018298             | 0.4838006 | 0.00    | 0   | 15              | protein-chromophore linkage                                     | CRY1,OPN1MW,RRH,NID1,OPN3,HMCN1,OPN1SW,CRY2,NID2,HMCN2,OPN4,RGR,RHO,AMBP,OPN5                                                                                                                                                                                                                                                                                                                                                                                                                                                                                                                                                             |
| GO:0042559             | 0.3254603 | 0.00    | 0   | 11              | pteridine and derivative biosynthetic process                   | GPHN,QDPR,PCBD1,MOCS1,PTS,MOCS2,PCBD2,GCH1,MOCS3,MOCOS,SPR                                                                                                                                                                                                                                                                                                                                                                                                                                                                                                                                                                                |
| GO:0042558             | 0.4630108 | 0.00    | 0   | 15              | pteridine and derivative metabolic process                      | FOLR1,GPHN,SHMT1,QDPR,PCBD1,MOCS1,PTS,MOCS2,PAH,GNMT,PCBD2,GCH1,MOCS3,MOCOS,SPR                                                                                                                                                                                                                                                                                                                                                                                                                                                                                                                                                           |
| GO:0006144             | 0.8179166 | 0.00    | 0   | 15              | purine base metabolic process                                   | PPAT,PAICS,AK1,HPRT1,SHMT1,AK2,GART,PRPS1L1,GMPS,PRHOXNB,PRPS1,DPYD,APRT,1190003115RIK,UOX                                                                                                                                                                                                                                                                                                                                                                                                                                                                                                                                                |
| GO:0006163             | 0.194036  | 0.00    | 0   | 94              | purine nucleotide metabolic process                             | PPAT,ATP5F1,PAICS,AK1,ATP7A,ADSSL1,ADSL,FIGNL1,HPRT1,ATP5J2,MYH7,PRPS2,MYH6,MUTYH,RP2H,ATP6V0B,ATP5G1,LD HD,GART,ATP5G2,NME5,ATP5G3,PNP1,ATP5A1,ATP5C1,ATP5J,RBM3,ATP5L,ATP5D,SLC25A13,NUDT1,MYO9B,MSH2,NME4,P APSS1,ATP5H,ATP6AP1,ENPP1,ATP6V1F,NME1,NDUFS1,ATP5B,GUK1,AMPD3,RP1H,IMPDPH1,ATP5O,GMPS,ATP6VOC,TGFB1,I MPDH2,ND4L,MTHFD1,ATP1A1,ATP5E,GMPPR2,ERCC3,NT5E,NME7,ADSS,NME6,ACLY,DGUOK,NUDT9,ATP6V1A,ATP6V1B1,MP G,ADA,PRPS1,ATP6V1B2,DECR2,OLA1,ATIC,NME2,NADK,ABCC6,TXNDC3,ATP6V0D2,CTNS,ADAL,AK5,AMPD2,OGG1,MON2,AT P1A2,CLCA3,AMPD1,NME3,NUDT15,ATP2A1,ENTPD2,ENTPD1,PFAS,ATP5K                                             |
| GO:0002016             | 0.7329437 | 0.00    | 0   | 9               | regulation of blood volume by renin-angiotensin                 | ACE,AGTR1B,NKX2-1,ACE2,AGT,AGTR2,MIF,AGTR1A,DRD3                                                                                                                                                                                                                                                                                                                                                                                                                                                                                                                                                                                          |
| GO:0050773             | 0.4561024 | 0.00    | 0   | 17              | regulation of dendrite development                              | SGK1,NTRK2,CHRN2,CIT,ACHE,SMAD1,KNDC1,RHOA,CHRNA3,PTPRF,TLX2,DBN1,YWHAH,KALRN,LZTS1,SIPA1L1,MT3                                                                                                                                                                                                                                                                                                                                                                                                                                                                                                                                           |
| GO:0007096             | 0.7255034 | 0.00    | 0   | 12              | regulation of exit from mitosis                                 | UBE2C,CDC23,BIRC5,SIRT2,NPM2,MAD2L1BP,ZW10,NEUROG1,TGFB1,ANLN,PPP1R9B,KNTC1                                                                                                                                                                                                                                                                                                                                                                                                                                                                                                                                                               |
| GO:0043467             | 0.5165233 | 0.00    | 0   | 13              | regulation of generation of precursor metabolites and energy    | ADRA1B,ATP7A,FRAP1,PRKACA,INS2,GFPT1,NKX1-1,ENPP1,CISD2,GCK,DYRK2,C1QTNF2,AVPR1A                                                                                                                                                                                                                                                                                                                                                                                                                                                                                                                                                          |
| GO:0032844             | 0.3318777 | 0.00    | 0   | 38              | regulation of homeostatic process                               | LHCGR,GPX1,IAPP,PLA2G4A,APLN,EGLN2,LYN,GCLC,TNFRSF11B,VEGFA,MC4R,AGT,CCR5,CCR1,CAR2,BDKRB1,CARTPT,BCL2,ED NRB,TNFSF11,GCLM,THY1,NF1,TGFB1,TGFB2,INPP5D,AHSG,P2RX7,GLRX2,DDIT3,CALCA,EDNRA,CCK,CALCR,TXNDC4,APEX1,M S4A2,SPP1                                                                                                                                                                                                                                                                                                                                                                                                              |
| GO:0032350             | 0.6498292 | 0.00    | 0   | 13              | regulation of hormone metabolic process                         | BMP6,LHCGR,GAL,STUB1,HIF1A,TCF7L2,TRERF1,KCNMA1,ATP1A1,NR3C1,AOF2,ARNT,CACNA1A                                                                                                                                                                                                                                                                                                                                                                                                                                                                                                                                                            |

Table S2A. Gene sets up-regulated by mild stress plus morphine

| Gene Ontology category | Score     | p-value | FDR | Gene set length | Gene_set_description                                                   | Gene_set_genes                                                                                                                                                                                                                                                                                                                                                                                                                                                                                                                                                                                                                                                                                                                                                                                                                                                                                                                                                                                                                                                                                                                                                                                                                                                                               |
|------------------------|-----------|---------|-----|-----------------|------------------------------------------------------------------------|----------------------------------------------------------------------------------------------------------------------------------------------------------------------------------------------------------------------------------------------------------------------------------------------------------------------------------------------------------------------------------------------------------------------------------------------------------------------------------------------------------------------------------------------------------------------------------------------------------------------------------------------------------------------------------------------------------------------------------------------------------------------------------------------------------------------------------------------------------------------------------------------------------------------------------------------------------------------------------------------------------------------------------------------------------------------------------------------------------------------------------------------------------------------------------------------------------------------------------------------------------------------------------------------|
| GO:0033157             | 0.2199275 | 0.00    | 0   | 45              | regulation of intracellular protein transport                          | FAF1,SMAD3,TACC3,PTPN11,NLRP3,MDFI,MBTPS1,EDA,TNFSF14,MXI1,PRKCQ,GSK3B,AGTR2,PRKACA,GOPC,RHOA,CD27,CDK5,NFKBIE,PKIA,SMO,TNF,JAK2,NF1,UACA,GLI3,TGFB1,SHH,NFKBIL1,TRIP6,IL10,G3BP2,NOLC1,BARD1,PRDX1,NFKBIA,CDH1,SUFU,FLNA,EDAR,PKIG,SIRT1,UHMK1,BCL3,HNF4A                                                                                                                                                                                                                                                                                                                                                                                                                                                                                                                                                                                                                                                                                                                                                                                                                                                                                                                                                                                                                                   |
| GO:0032386             | 0.165566  | 0.00    | 0   | 56              | regulation of intracellular transport                                  | FAF1,SMAD3,TACC3,PTPN11,CRYAB,NLRP3,MDFI,MBTPS1,KHDRBS1,EDA,TNFSF14,CAPN10,MXI1,PRKCQ,GSK3B,AGTR2,PRKACA,GOPC,RHOA,CD27,CDK5,NUDT4,NFKBIE,PKIA,SMO,TNF,JAK2,NF1,UACA,GLI3,TGFB1,SHH,NFKBIL1,TRIP6,AAAS,TNNC1,IL10,G3BP2,NOLC1,MYLK2,BARD1,PRDX1,NFKBIA,NCBP2,ABCA2,CDH1,SUFU,CRYAA,FLNA,EDAR,PKIG,SIRT1,UHMK1,MYBPC3,BCL3,HNF4A                                                                                                                                                                                                                                                                                                                                                                                                                                                                                                                                                                                                                                                                                                                                                                                                                                                                                                                                                              |
| GO:0019216             | 0.3562091 | 0.00    | 0   | 70              | regulation of lipid metabolic process                                  | NPC2,IGFBP7,APOA2,EDF1,BMP6,BRCA1,LHCGR,GAL,PRKAA2,PLA2G4A,SLC25A20,FRAP1,STUB1,STAT5B,ACACB,GCG,BBS4,AGT,ASAH3,ABCG1,MVK,CPT2,CYP51,ACSL4,INS2,CPT1A,APOA5,ANGPTL3,NR5A1,PPAP2A,MLXIPL,ANGPTL4,PRKAA1,DHH,PRKAB2,KCNMA1,PPARGC1A,ATP1A1,APOC3,GHSR,NR3C1,STAT5A,PDGFA,DHCR7,ACSL1,SF1,SOD1,MLYCD,SEC14L2,YY1,CAV1,CPT1B,NR0B1,PDGFB,PRKAG2,ADORA1,L,LEP,CIDEA,LSR,DRD3,SCAP,ADIPOQ,C1QTNF2,PPARA,ABCG4,APOB,STAR,HNF4A,FABP1,THRHB                                                                                                                                                                                                                                                                                                                                                                                                                                                                                                                                                                                                                                                                                                                                                                                                                                                          |
| GO:0007088             | 0.2388832 | 0.00    | 0   | 47              | regulation of mitosis                                                  | UBE2C,PKMYT1,EDN1,MAD2L1,CDC16,CDC23,NUSAP1,BIRC5,SIRT2,IGF1,ESPL1,NPM2,SHC1,MAD2L1BP,ZW10,AURKAIP1,ZZF1,TNF,PARC,NEUROG1,PIN1,RCC1,ANAPC10,TGFB1,BTC,LTA,TGFA,NEK2,EREG,FGFR3,HECTD3,EPGN,ANLN,CDC2L1,TUBG1,HOXA13,CD28,PPP1R9B,NEK6,YWHAH,KNTC1,ESR1,EDN3,CDC2L5,PRMT5,EGF,CDC25C                                                                                                                                                                                                                                                                                                                                                                                                                                                                                                                                                                                                                                                                                                                                                                                                                                                                                                                                                                                                          |
| GO:0046822             | 0.1957474 | 0.00    | 0   | 48              | regulation of nucleocytoplasmic transport                              | FAF1,SMAD3,TACC3,PTPN11,NLRP3,MDFI,MBTPS1,KHDRBS1,EDA,TNFSF14,MXI1,PRKCQ,GSK3B,AGTR2,PRKACA,RHOA,CD27,CDK5,NUDT4,NFKBIE,PKIA,SMO,TNF,JAK2,NF1,UACA,GLI3,TGFB1,SHH,NFKBIL1,TRIP6,AAAS,IL10,G3BP2,NOLC1,BARD1,PRDX1,NFKBIA,NCBP2,CDH1,SUFU,FLNA,EDAR,PKIG,SIRT1,UHMK1,BCL3,HNF4A                                                                                                                                                                                                                                                                                                                                                                                                                                                                                                                                                                                                                                                                                                                                                                                                                                                                                                                                                                                                               |
| GO:0045667             | 0.3780706 | 0.00    | 0   | 37              | regulation of osteoblast differentiation                               | BMPR1B,SMAD3,TWIST2,BMP6,BMP2,NELL1,BMP7,IGF1,SMAD1,ESRRA,SMAD5,CTNNB1,TOB1,ACVR2B,DLX5,BMP4,GNAS,BMPR1A,RUNX2,FZD1,NPPC,AXIN2,MEN1,BMPR2,HEMGN,OSTN,JUND,TWSG1,PDLIM7,AREG,ACVR1,CHRD,IFI204,CDK6,ACVR2A,CD276,WNT7B                                                                                                                                                                                                                                                                                                                                                                                                                                                                                                                                                                                                                                                                                                                                                                                                                                                                                                                                                                                                                                                                        |
| GO:0032881             | 0.4464129 | 0.00    | 0   | 9               | regulation of polysaccharide metabolic process                         | ADRA1B,FRAP1,INS2,GFPT1,ENPP1,GCK,DYRK2,C1QTNF2,AVPR1A                                                                                                                                                                                                                                                                                                                                                                                                                                                                                                                                                                                                                                                                                                                                                                                                                                                                                                                                                                                                                                                                                                                                                                                                                                       |
| GO:0042306             | 0.164954  | 0.00    | 0   | 38              | regulation of protein import into nucleus                              | FAF1,SMAD3,TACC3,NLRP3,MDFI,MBTPS1,EDA,TNFSF14,MXI1,PRKCQ,AGTR2,RHOA,CD27,NFKBIE,PKIA,SMO,TNF,JAK2,NF1,UACA,GLI3,TGFB1,SHH,NFKBIL1,TRIP6,IL10,G3BP2,NOLC1,PRDX1,NFKBIA,CDH1,SUFU,FLNA,EDAR,PKIG,SIRT1,BCL3,HNF4A                                                                                                                                                                                                                                                                                                                                                                                                                                                                                                                                                                                                                                                                                                                                                                                                                                                                                                                                                                                                                                                                             |
| GO:0051223             | 0.1471715 | 0.00    | 0   | 49              | regulation of protein transport                                        | FAF1,SMAD3,TACC3,PTPN11,NLRP3,MDFI,MBTPS1,EDA,TNFSF14,MXI1,PRKCQ,GSK3B,AGTR2,PRKACA,GOPC,RHOA,CD27,CDK5,NFKBIE,PKIA,SMO,TNF,JAK2,NF1,UACA,GLI3,TGFB1,SHH,NFKBIL1,LTA,TRIP6,IL10,G3BP2,GAPVD1,NOLC1,BARD1,PRDX1,NFKBIA,PRKCZ,EXOC4,CDH1,SUFU,FLNA,EDAR,PKIG,SIRT1,UHMK1,BCL3,HNF4A                                                                                                                                                                                                                                                                                                                                                                                                                                                                                                                                                                                                                                                                                                                                                                                                                                                                                                                                                                                                            |
| GO:0001976             | 0.3760557 | 0.00    | 0   | 14              | regulation of systemic arterial blood pressure by neurological process | ADRA1B,DRD2,AGTR1B,ACE2,AGT,AGTR2,MIF,P2RX2,AGTR1A,TNNI3,CALCA,ADRA1D,CHRNA7,ADRA1A                                                                                                                                                                                                                                                                                                                                                                                                                                                                                                                                                                                                                                                                                                                                                                                                                                                                                                                                                                                                                                                                                                                                                                                                          |
| GO:0042990             | 0.3869425 | 0.00    | 0   | 28              | regulation of transcription factor import into nucleus                 | FAF1,SMAD3,TACC3,NLRP3,MDFI,MBTPS1,EDA,TNFSF14,MXI1,PRKCQ,AGTR2,RHOA,CD27,NFKBIE,TNF,NF1,UACA,NFKBIL1,TRIP6,IL10,G3BP2,PRDX1,NFKBIA,CDH1,SUFU,FLNA,EDAR,BCL3                                                                                                                                                                                                                                                                                                                                                                                                                                                                                                                                                                                                                                                                                                                                                                                                                                                                                                                                                                                                                                                                                                                                 |
| GO:0019229             | 0.3611183 | 0.00    | 0   | 31              | regulation of vasoconstriction                                         | EDN1,ALOX5,ACE,HTR2C,APLN,KCNMB2,EDN2,ADM,ACE2,AGT,PRKCQ,HTR2A,TBXA2R,SHC1,RHOA,TBXAS1,NPPC,MAP2K1,CAV1,CACNA1C,AGTR1A,P2RX1,BDKRB2,HSPA1A,KCNMB4,DBH,ATP1A2,EDN3,ADRA1A,F2R,NPY1R                                                                                                                                                                                                                                                                                                                                                                                                                                                                                                                                                                                                                                                                                                                                                                                                                                                                                                                                                                                                                                                                                                           |
| GO:0009628             | 0.1008764 | 0.00    | 0   | 352             | response to abiotic stimulus                                           | IGFBP7,ADRA1B,SLC24A1,TRPV4,SLC12A2,SGK1,ACADM,ATXN1,SOD2,BLM,PCSK1N,OPN1MW,PLEKH81,IMMT,STX1A,BMP2,GATAT2,TRH,GUCA1A,KRT8,IGFBP2,CYP2R1,DNAJB4,SLC2A1,GPX1,CASP7,RAC1,ATP2B2,PLA2G4A,FOXO2,ABCA4,EIF2B4,CRYAB,DRD2,GTSE2,REV1,MMP2,ABCG5,PDE1B,GCLC,ACCN2,FYN,TACR1,FOS,TSC22D2,PLCB4,SMPD2,KCNA5,TIMP3,CHRN2,PML,GRIN2D,GPR98,NGFR,IGF1,PPARD,PMCH,RCVRN,TRPC3,TSC22D4,PDCL3,ALDOA,ADM,PKD1,POLH,STAT1,UNC119,1200009F1,ORIK,OPN3,ACCN3,STRBP,SOX2,OPN1SW,TULP1,HSPD1,AGT,HUS1,CHRNA9,PITPNM1,NOX3,BAK1,CRHR1,ABCC2,PRKCQ,CCND1,PNP1,IL12B,GNGT2,NPFFR2,GHRL,EIF2B3,CAR2,RBM3,PMAIP1,COL3A1,TIMELESS,TSC22D3,PKN1,COL18A1,FOSL1,HSPA4,LRRP2,CDKN2D,PCYT1A,RGS9BP,CLOCK,DRD1A,SLC6A18,COP3,RHOA,CAT,CDKN1A,MAT2A,SORD,CDK5,LIG4,ELA2,NRAS,EIF2B1,MSH2,PDPK1,MAP3K1,TRPA1,NEK1,BMP4,BCL2,CIRBP,TXNIP,CHD4,PNKP,PDE6B,TGFB11,CASP9,PDE6D,ITGA2,MIF,ABCB1B,MGP,IL12A,SOCS3,BRCC3,MMP13,PKLR,BCRA2,PMP22,ATP1A3,TNF,TAC1,BTG2,FKBP,VGF,OSM,ERCC4,PCDH15,PRKDC,AAAT,BAX,CSDA,NF1,KCNMA1,CDH23,ERCC1,MSH6,PPM1D,NPHP4,TRPV1,IL18,DRD5,UACA,HSPB2,RCAN1,GNB1,HMGN1,HVCN1,ERCC2,TRP53BP2,ACTA1,ABCC8,IL1B,OTOP1,APP,COL1A1,GUCA1B,ERCC8,LTA,AKT1,ADRB2,UBE4B,CDK2,MPZ,ERCC3,MYC,ACADM,PCSK1N,IMMT,TRH,FOS,PMCH,ADM,AGT,RBM3,TRPA1,CIRBP,VGF,CSDA,IL18,ADRB2,P2RX3,TRPM8,GMPR,ADRB1,ADRB3,FOSL2,DIO2 |
| GO:0009409             | 0.454127  | 0.00    | 0   | 22              | response to cold                                                       | ADRA1B,DRD2,AGTR1B,ACE2,AGT,AGTR2,MIF,P2RX2,AGTR1A,TNNI3,CALCA,ADRA1D,CHRNA7,ADRA1A                                                                                                                                                                                                                                                                                                                                                                                                                                                                                                                                                                                                                                                                                                                                                                                                                                                                                                                                                                                                                                                                                                                                                                                                          |
| GO:0031960             | 0.2668145 | 0.00    | 0   | 85              | response to corticosteroid stimulus                                    | IGFBP7,APOA2,SGK1,ACADM,PDCD7,BMP6,TRH,IGFBP2,PLA2G4A,PPARGC1B,BCKDHB,A2M,CCNE1,FOS,BIRC5,PIK3R1,PAPPA,HTR1B,AGXT,PARK2,RXRA,ADM,SJ,CPN1,EP300,CCND1,SDC1,FOSL1,SHC1,CDKN1A,BAD,AGL,BMP4,BCL2,GOT1,BCHE,MIF,PTPRU,MGP,FAS,TNF,BAX,KCNMA1,IL1RN,SULT1A1,IL1B,COL1A1,BCKDHA,LCAT,CASP3,IL10,MDK,MAP2K1,CAV1,CNGA3,IL6,SRCDPYD,ABCA3,GNRH1,ABCB4,C1QB,ACADS,IL6RA,KRAS,RPS6KB1,FABP4,ALPL,PRKCA,SERPINA7,TAT,ASL,ADIPOQ,AREG,CALCR,PRSS8,ALDOB,UCN,HP,FOSB,JUNB,PKC2,PTGDS,CEBPA,SLC9A3                                                                                                                                                                                                                                                                                                                                                                                                                                                                                                                                                                                                                                                                                                                                                                                                         |

Table S2A. Gene sets up-regulated by mild stress plus morphine

| Gene Ontology category | Score     | p-value | FDR | Gene set length | Gene_set_description                                        | Gene_set_genes                                                                                                                                                                                                                                                                                                                                                                    |
|------------------------|-----------|---------|-----|-----------------|-------------------------------------------------------------|-----------------------------------------------------------------------------------------------------------------------------------------------------------------------------------------------------------------------------------------------------------------------------------------------------------------------------------------------------------------------------------|
| GO:0007051             | 0.431757  | 0.00    | 0   | 36              | spindle organization and biogenesis                         | UBE2C,TACC3,CKS2,DYNC1LI1,RANBP1,SMC3,TTK,TUBB1,NDC80,ESPL1,PRC1,UNC84B,KIF11,KIF23,CENPJ,ZWINT,AURKA,STMN1,BUB1B,FBXO5,DCTN2,DYNC1H1,TUBB5,RCC1,MLH1,RAN,MYH9,SAC3D1,CCDC100,TPX2,1700009N14RIK,TUBG1,SPAG5,SMC1A,PCNT,TACC2                                                                                                                                                     |
| GO:0006614             | 1.0086467 | 0.00    | 0   | 6               | SRP-dependent cotranslational protein targeting to membrane | SRPR,SRP9,SRP19,VCAN,SRP14,SRP72                                                                                                                                                                                                                                                                                                                                                  |
| GO:0042310             | 0.2926818 | 0.00    | 0   | 39              | vasoconstriction                                            | ADRA1B,EDN1,ALOX5,ACE,HTR2C,APLN,KCNMB2,EDN2,ADM,ACE2,AGT,PRKCO,HTR2A,TBXA2R,SHC1,RHOA,EDNRB,TBXAS1,DRD5,NPPC,G6PDX,AVP,MAP2K1,CAV1,CACNA1C,AGTR1A,P2RX1,BDKRB2,HSPA1A,KCNMB4,EDNRA,ADRA1D,DBH,ATP1A2,KEL,EDN3,ADRA1A,F2R,NPY1R                                                                                                                                                   |
| GO:0019058             | 0.2835242 | 0.00    | 0   | 50              | viral infectious cycle                                      | MDFIC,WWP1,VAPB,PVRL1,PSIP1,DEK,TARBP2,OPRK1,CCL2,CD81,HS3ST5,COX11,ACE2,CCL5,XRCC5,CCR5,CCL3,BANF1,TOP2A,RSF1,WWP2,LIG4,MAP3K1,BCL2,CCL4,HS3ST6,ITCH,CD4,TNF,HMGA1,EIF5A,CTBP1,PPIA,HTATSF1,HBXIP,SMARCB1,SUPT5H,APOBEC3,CXCR6,CD28,FURIN,TNIP1,CXCR4,CTBP2,UBP1,IFNB1,XRCC4,XRCC6,PCSK5,NFIA                                                                                    |
| GO:0016032             | 0.2768395 | 0.00    | 0   | 64              | viral reproduction                                          | MDFIC,SMAD3,DERL1,WWP1,RRAGA,VAPB,PVRL1,PSIP1,DEK,TARBP2,HIPK2,OPRK1,CCL2,CD81,HS3ST5,COX11,ACE2,CCL5,XRCC5,CCR5,CCL3,BANF1,TOP2A,RSF1,WWP2,LIG4,MAP3K1,BCL2,CCL4,HS3ST6,ITCH,CD4,TNF,HMGA1,CALCOCO2,UACA,TGFB1,EIF5A,CTBP1,PARD6A,HCFC1,PPIA,HTATSF1,HBXIP,SMARCB1,OAS1A,SUPT5H,CCL1,INSR,APOBEC3,GF1,HCFC2,CXCR6,CD28,FURIN,TNIP1,CXCR4,CTBP2,UBP1,IFNB1,XRCC4,XRCC6,PCSK5,NFIA |
| GO:0022415             | 0.3863451 | 0.00    | 0   | 57              | viral reproductive process                                  | MDFIC,SMAD3,DERL1,WWP1,RRAGA,VAPB,PVRL1,PSIP1,DEK,TARBP2,HIPK2,OPRK1,CCL2,CD81,HS3ST5,COX11,ACE2,CCL5,XRCC5,CCR5,CCL3,BANF1,TOP2A,RSF1,WWP2,LIG4,MAP3K1,BCL2,CCL4,HS3ST6,ITCH,CD4,TNF,HMGA1,TGFB1,EIF5A,CTBP1,HCFC1,PPIA,HTATSF1,HBXIP,SMARCB1,SUPT5H,INSR,APOBEC3,CXCR6,CD28,FURIN,TNIP1,CXCR4,CTBP2,UBP1,IFNB1,XRCC4,XRCC6,PCSK5,NFIA                                           |
| GO:0019048             | 1.3445012 | 0.00    | 0   | 9               | virus-host interaction                                      | SMAD3,DERL1,RRAGA,VAPB,TARBP2,HIPK2,HS3ST6,TGFB1,INSR                                                                                                                                                                                                                                                                                                                             |



Table S2B. Gene sets down-regulated by mild stress plus morphine

| Gene Ontology category | Score      | p-value | FDR | Gene set length | Gene set description                             | Gene set genes                                                                                                                                                                                                                                                                                                                                                                                                                                                                                                                                                                                                                                                                                                                                                                                                                                                                                                                                                                                                                                                                                                                                                                                                                         |
|------------------------|------------|---------|-----|-----------------|--------------------------------------------------|----------------------------------------------------------------------------------------------------------------------------------------------------------------------------------------------------------------------------------------------------------------------------------------------------------------------------------------------------------------------------------------------------------------------------------------------------------------------------------------------------------------------------------------------------------------------------------------------------------------------------------------------------------------------------------------------------------------------------------------------------------------------------------------------------------------------------------------------------------------------------------------------------------------------------------------------------------------------------------------------------------------------------------------------------------------------------------------------------------------------------------------------------------------------------------------------------------------------------------------|
| GO:0055066             | -0.1232928 | 0       | 0   | 238             | di-, tri-valent inorganic cation homeostasis     | HRH3,ADRA1B,TRPV4,EDN1,COMMD1,TRF,HAMP,LHCGR,ITGB3,GNAT2,ATP7A,PTGER3,SLC30A5,ATP2B2,CLN3,CCR2,DRD2,LYN,FTMT,AGTR1B,ITPR3,ALAS2,KCNA5,FXDY1,CCL2,HEXB,TGM2,PMCH,HIF1A,EFHC1,TRFR2,ITGB1,1300017J02RIK,SRPRB,CCKAR,ADM,TPT1,S100B,RSHL1,P2RY4,GNA15,TTCT,OPRL1,CCL5,CCR4,RGN,CRHR1,CCR5,CNTNAP1,CCR10,ABC6,CCR1,GHRL,APLP2,FKBP1B,ATOX1,CCL3,KDR,GRIK2,SLC30A8,GLP1R,CASR,TBXA2R,BDKRB1,PTHR1,HMOX1,HPX,PYGM,GPR6,PLCE1,FXN,CD55,MCHR1,ELA2,IL6ST,NMUR2,SV2A,PLN,BCL2,SLC39A4,PTH2R,EDNRB,NDN,FTL2,ACO1,IL2,APOE,CUTC,CACNB4,GHRH,FTL1,TAC1,THY1,SYPL2,CP,JAK2,ATP2A2,CALCB,HERPUD1,CYSLTR1,TRPC2,LCK,ITGAV,TGFB1,LPAR1,GNB1,IL1B,SLC30A1,TGFB2,APP,SLC8A1,CALR,CCL19,HCRT,TGFA,DMWD,MYC,NUCB2,HSP90B1,PGM1,PRND,C3AR1,CCR9,SLC39A5,CCL28,TRDN,STC1,CCR8,KNG1,SRI,SLC24A3,CXCL13,SCO1,GALR2,SOD1,GNA13,GNG3,AVPR1B,TRPM8,KISS1,CAV1,MT2,BANK1,CACNA1C,ATP2C1,XCL1,TRPV5,IREB2,CCL1,C5AR1,AGTR1A,CCR3,MT1,VDR,CHERP,HTT,BDKRB2,F2,IBTK,ATP7B,MFI2,CLSTN1,ATP2B4,GCM2,RYR2,JPH2,HR,C,FTHL17,TFRC,CACNA1F,PROK2,SLC37A4,PRKCB1,CTRC,HFE,GRIN1,ABC7,TRHR,LPAR3,ANXA7,TNNI3,ITF,PRKCA,CALCA,FZD2,CD52,ITPR1,EDNRA,GPR12,FTH1,RYR3,CCR7,PRNP,CXCR4,EG434729,PSEN1,CACNA1A,PTK2B,CXCR3,CCL7,CCKBR,WFS1,NPY2                                    |
| GO:0006266             | -0.4747065 | 0       | 0   | 9               | DNA ligation                                     | HMG2B,TOP2A,LIG4,HMG1B,RAD51,APTX,XRCC4,XRCC6,MGMT                                                                                                                                                                                                                                                                                                                                                                                                                                                                                                                                                                                                                                                                                                                                                                                                                                                                                                                                                                                                                                                                                                                                                                                     |
| GO:0007204             | -0.1986696 | 0       | 0   | 106             | elevation of cytosolic calcium ion concentration | HRH3,ADRA1B,TRPV4,EDN1,LHCGR,GNAT2,PTGER3,CCR2,LYN,AGTR1B,ITPR3,TGM2,PMCH,CCKAR,ADM,P2RY4,GNA15,OPRL1,CCR4,CRHR1,CCR5,CNTNAP1,CCR10,CCR1,GHRL,FKBP1B,KDR,GLP1R,TBXA2R,BDKRB1,PTHR1,GPR6,PLCE1,CD55,MCHR1,NMUR2,EDNRB,IL2,GHRH,TAC1,THY1,JAK2,CYSLTR1,TRPC2,LCK,ITGAV,TGFB1,LPAR1,GNB1,IL1B,TGFB2,SLC8A1,HCRT,C3AR1,CCR9,CCL28,CCR8,KNG1,CXCL13,GALR2,GNA13,GNG3,AVPR1B,KISS1,CACNA1C,C5AR1,AGTR1A,CCR3,BDKRB2,F2,IBTK,JPH2,PROK2,TRHR,LPAR3,CALCA,FZD2,CD52,ITPR1,EDNRA,CCR7,CXCR4,CACNA1A,PTK2B,CXCR3,CCKBR,NPY2R,CALCR,TRPC6,CCR6,PTPRC,CAV3,CD24A,GIPR,MS4A2,ADRA1A,F2RL1,F2R,S1PR1,EPOR,XCR1,RXFP3,AVPR1A,NMB,SAAI,LPAR2                                                                                                                                                                                                                                                                                                                                                                                                                                                                                                                                                                                                           |
| GO:0034101             | -0.1556556 | 0       | 0   | 58              | erythrocyte homeostasis                          | HEPH,HBA-A1,EPO,HBA-A2,MAEA,LYN,FOXO3A,ALAS2,STAT5B,DNASE2A,HIF1A,SMAP1,SMAD5,TAL1,ANK1,SP1,JMJD6,SOX6,HMOX1,BMP4,SFPI1,CEBP,PG,DYRK3,ERCC2,SP3,STAT5A,G6PDX,SFXN1,ACVR1B,ID2,INPP5D,TIMP1,ACIN1,ETS1,IREB2,KLF1,FOXO3,BPGM,MAPK14,PRDX1,RPS19,LDB1,TCEA1,MAFB,INHBA,EPAS1,ARNT,MB,LMO2,BCL6,INHA,CD24A,CDK6,ACVR2A,RB1,EPB4.2,HCLS1,PKNOX1                                                                                                                                                                                                                                                                                                                                                                                                                                                                                                                                                                                                                                                                                                                                                                                                                                                                                            |
| GO:0007342             | -1.1327216 | 0       | 0   | 11              | fusion of sperm to egg plasma membrane           | ITGA3,CD9,CATSPER1,IZUMO1,HYAL4,ADAM2,ADAM1A,CRISP1,SERPINA5,HYAL5,SPAM1                                                                                                                                                                                                                                                                                                                                                                                                                                                                                                                                                                                                                                                                                                                                                                                                                                                                                                                                                                                                                                                                                                                                                               |
| GO:0048534             | -0.1189614 | 0       | 0   | 340             | hemopoietic or lymphoid organ development        | TACC3,HEPH,ZFP36,BLM,ATP7A,ACE,CD164,WWP1,HBA-A1,FLT3L,EPO,HBA-A2,SPNA1,MITF,HMG1B,CCR2,CSF1,MEIS1,MAEA,LYN,FOXO3A,CLPTM1,ALAS2,HBB-B1,STAT5B,CD2,PIK3R1,PML,CD74,EBP,DNASE2A,RHOH,MLF1,HIF1A,ESRR,SMAP1,SMAD5,NTRK1,TNFRSF11B,TAL1,KITL,NCA,PH2,KLF6,CLCF1,KIRREL3,TAZ,LTBR,PBX1,CLEC2G,CTNNB1,VPREB1,TTCT,IL4RA,XRCC5,PNP1,ANK1,CCR1,IL12B,MYST1,CAR2,S,P1,FUT10,CD42,KDR,JMJD6,ITPKB,SOX6,HOXB3,ERBB2,IL11,HELLS,HOXB7,CD27,CEBPE,TCF3,TLX1,CARTPT,BAD,LIG4,POU2F2,MSH2,PRDX3,FLT3,CHUK,BMP4,BCL2,DNAJA3,AP3D1,GNAS,FOXP1,NKX3-2,HOXB4,IL2,ZAP70,SFPI1,TNFRSF11A,RTKN2,TNFSF11,SH2B3,FAS,CACNB4,CEBPG,CD4,CSF3,IL2RA,TNF,IL31RA,TCFE2A,PRKD,C,JAK2,NF1,CASP8,IL25,IL7R,ERCC1,DYRK3,NOTCH4,FOXJ1,THOC5,SIX1,PTPN22,LCK,SPN,TGFB1,VAV1,SART1,HDACS,PGM3,S,HH,ERCC2,MLL1,NOTCH2,TGFB2,HS1BP3,RAG2,PAX1,SP3,LTA,PLCG2,TSHR,GMPR2,KLF11,FOXP3,IL17C,POU1F1,IRF8,FGF3,NKX2-5,MED1,H2-DMA,POLM,CD79A,MALT1,H2-AA,STAT5A,MYH9,CSF1R,TERC,CD3D,G6PDX,WNT3A,JAG2,IL10,SOCS5,TLR3,MMP9,IL7,SFXN1,LIF,STAP1,TGFB2,HDAC7,PICALM,CXCL13,TBX1,ACVR1B,ID2,BLNK,CD300LF,TXNRD2,INPP5D,SOD1,IL21,MEN1,TGFB1,CORO1A,RORC,NCOA6,TIMP1,CXCR5,PSEN2,AP3B1,GADD45G,IL3,IRF1,NKX2-3,PURB,LILRB3,CARD11,ADA,ACIN1,ETS1,IL20,KLF1,HHEX,OSTM1,FOXP1,DOCK2,GAB3 |
| GO:0007599             | -0.2922338 | 0       | 0   | 106             | hemostasis                                       | FBN1,EDN1,F5,ITGB3,EFEMP2,L3MBTL4,FBLN5,VWF,CD9,SCUBE1,P2RY1,GP1BA,AVPR2,FGF,COL3A1,F2R2,SERPINE1,IL11,CD36,EVL,SERPING1,ADORA2A,APOH,GP5,ITGA2,APOE,SERPINF2,FGA,P2RY12,TREML1,OTOG,RAB27A,F13B,ANXA5,F12,F13A1,PLSCR4,F11,MST1,F2RL3,PLAT,PABPC4,PDPN,LMAN1,CPB2,TMPRSS6,IL10RB,C3,PDGFA,KN61,C9,KRT1,ANXA2,GNA13,F8,CAV1,PDGFB,WAS,P2RX1,TFPI2,CD40,PLAUR,F2,VKORC1,FLI1,NFE2,F7,PROS1,ANXA8,PF4,F3,GGCX,HPS4,PROC,ANXA7,HGF,F10,M,MRN1,PLSCR1,TSPAN8,FGG,GNAQ,IL20RA,PPBP,SERPINC1,FOXA2,TFPI,CD40LG,PROZ,ENTPD2,ADAMTS13,F9,PLG,GNA12,F2RL1,HNF4A,F2R,PIK3CB,ENTPD1,SERPIND1,PLAU,PROCR,THBD,GP9,SERPINA5,SAAI                                                                                                                                                                                                                                                                                                                                                                                                                                                                                                                                                                                                                    |
| GO:0042090             | -1.4235162 | 0       | 0   | 10              | interleukin-12 biosynthetic process              | IFNG,IRF1,TLR6,REL,TRAF6,NFKB1,MAST2,LTB,RELA,TLR4                                                                                                                                                                                                                                                                                                                                                                                                                                                                                                                                                                                                                                                                                                                                                                                                                                                                                                                                                                                                                                                                                                                                                                                     |
| GO:0032615             | -0.9063338 | 0       | 0   | 16              | interleukin-12 production                        | IFNG,NOD2,G6PDX,IL10,IRF1,PRKCD,CD40,TLR6,REL,TRAF6,NFKB1,CD40LG,MAST2,LTB,RELA,TLR4                                                                                                                                                                                                                                                                                                                                                                                                                                                                                                                                                                                                                                                                                                                                                                                                                                                                                                                                                                                                                                                                                                                                                   |
| GO:0001776             | -0.2147443 | 0       | 0   | 37              | leukocyte homeostasis                            | BCL10,STAT5B,TNFSF13B,TNFSF14,TNFRSF13B,EVI1,TNFRSF13C,IFNG,BCL2,DNAJA3,IL2,CD44,FAS,IL2RA,BAX,TGFB1,TGFB2,AKT1,FOXP3,SH2B2,IKKB,CASP3,STAT5A,SOD1,MEN1,CORO1A,IKBK,NKX2-3,LILRB3,BCL2L11,IL6,PPP3CB,SLC37A4,FANCC,PIK3CD,CD24A,FCER1G                                                                                                                                                                                                                                                                                                                                                                                                                                                                                                                                                                                                                                                                                                                                                                                                                                                                                                                                                                                                 |
| GO:0045576             | -0.88024   | 0       | 0   | 20              | mast cell activation                             | BCL10,LAT2,TAC4,HMOX1,LAT,THY1,FCER1A,YWHAZ,LCP2,FCGR2B,FYB,FCGR3,BTK,CPLX2,SYK,MS4A2,FCER1G,NDRG1,TLR4,CD48                                                                                                                                                                                                                                                                                                                                                                                                                                                                                                                                                                                                                                                                                                                                                                                                                                                                                                                                                                                                                                                                                                                           |
| GO:0007128             | -1.1794505 | 0       | 0   | 11              | meiotic prophase I                               | FBXO5,EHMT2,MLH1,SYCP2,SYCE1,RAD1,PIWIL2,PRDM9,OVOL1,SYCE2,FKBP6                                                                                                                                                                                                                                                                                                                                                                                                                                                                                                                                                                                                                                                                                                                                                                                                                                                                                                                                                                                                                                                                                                                                                                       |

**Table S2B. Gene sets down-regulated by mild stress plus morphine**

| Gene Ontology category | Score      | p-value | FDR | Gene set length | Gene_set_description                                      | Gene_set_genes                                                                                                                                                                                                                                                                                                                                                                                                                                                                                                                                                                                                                                                                                                                                                                                                                                                                  |
|------------------------|------------|---------|-----|-----------------|-----------------------------------------------------------|---------------------------------------------------------------------------------------------------------------------------------------------------------------------------------------------------------------------------------------------------------------------------------------------------------------------------------------------------------------------------------------------------------------------------------------------------------------------------------------------------------------------------------------------------------------------------------------------------------------------------------------------------------------------------------------------------------------------------------------------------------------------------------------------------------------------------------------------------------------------------------|
| GO:0006944             | -0.1709414 | 0       | 0   | 73              | membrane fusion                                           | EEA1,VAPA,ITGA3,VAMP3,PLA2G4A,CLN3,GM2A,SNAP23,CAST,OTOF,CD9,STXB1,VTI1A,VAV3,MFN1,CADPS,BAK1,RABIF,GCA, RIMS1,NSFL1C,TIE1,CAPN2,VTI1B,CATSPER1,OPA1,CD44,STX2,KCNH1,NAPA,BAX,VAMP2,GOSR2,CACNA1S,VAMP7,MFN2,NP LOC4,IZUMO1,CTBP1,STX11,HYAL4,NAPG,MYH9,RAB3A,SNPH,RABEP1,STAP1,CDON,ADAM2,NEO1,USO1,ANXA7,GNAI3,NSF, GRIK5,CPLX2,BNIP1,ATG7,STX6,CAV2,NTN2L,VCPIP1,LRMP,DYRK1B,PLDN,CACNA1H,ADAM1A,CRISP1,SERPINA5,HYAL5,SPAM 1,ADAM12,SNAP29                                                                                                                                                                                                                                                                                                                                                                                                                                  |
| GO:0046785             | -0.7219618 | 0       | 0   | 17              | microtubule polymerization                                | SGK1,CENPJ,STMN1,FBXO5,MAPRE1,CDKN1B,ASZ1,CAV1,CFTR,TPPP,MAPK8,CAV2,CTTNBP2,PSRC1,CAV3,MAPT,WNT2                                                                                                                                                                                                                                                                                                                                                                                                                                                                                                                                                                                                                                                                                                                                                                                |
| GO:0044266             | -0.1903085 | 0       | 0   | 24              | multicellular organismal macromolecule catabolic process  | ACE,MMP2,MMP10,ACE2,MMP8,ADAMTS14,MMP19,MMP13,MMP27,PEPD,MMP9,PRSS2,PRTN3,MMP1B,MMP14,ADAMTS 3,P2RX7,KLK6,MMP16,MMP7,MMP1A,MMP3,MMP11,ADAMTS2                                                                                                                                                                                                                                                                                                                                                                                                                                                                                                                                                                                                                                                                                                                                   |
| GO:0046716             | -0.6349286 | 0       | 0   | 11              | muscle maintenance                                        | GAA,HIF1A,MTM1,DMD,SOD1,PPP3CB,SRF,CAV3,LARGE,PLG,GYTL1B                                                                                                                                                                                                                                                                                                                                                                                                                                                                                                                                                                                                                                                                                                                                                                                                                        |
| GO:0030099             | -0.1913147 | 0       | 0   | 146             | myeloid cell differentiation                              | HEPH,ZFP36,HBA-A1,EPO,HBA- A2,MITF,HMGB3,CSF1,MAEA,LYN,FOXO3A,ALAS2,STAT5B,PIK3R1,PML,DNASE2A,HIF1A,ESRRA,SMAP1,SMAD5,TNFRSF11B,TA L1,KITL,CLEC2G,CTNNB1,ANK1,CCR1,MYST1,CAR2,SP1,CD42,JMJD6,SOX6,IL11,HOXB7,CEBPE,CARTPT,PRDX3,CHUK,BMP4,G NAS,SFP11,TNFSF11,FAS,CEBPG,CSF3,TNF,IL31RA,JAK2,NF1,CASP8,IL25,DYRK3,THOC5,TGFB1,ERCC2,SP3,GMPR2,IL17C,IRF8,S TATS5A,MYH9,CSF1R,G6PDX,TLR3,MMP9,SFXN1,LIF,STAP1,TGFBR2,ACVR1B,ID2,CD300LF,INPP5D,NCOA6,TIMP1,PSEN2,IL3,NK X2- 3,PURB,LILRB3,ACIN1,ETS1,KLF1,OSTM1,GAB3,CSF2,TCFE3,FOXO3,BPGM,SNRK,RUNX1,MAPK14,PPARG,RPS19,RASGRP4,DHR S2,ZBTB7A,LDB1,TCEA1,LEP,MYST3,C8FB,NFKBIA,SPIB,MAFB,JUN,PF4,INHBA,EPAS1,TRAF6,IL4,CCL21A,ARNT,CALCA,MB,LMO 2,PLSCR1,PSEN1,CBFA2T3,IRF4,CALCR,PPBP,JAG1,ZBTB16,VPS33A,BCL6,TIRAP,CLEC2D,TM7SF4,INHA,KLF10,IFI204,CDK6,ADA M10,ACVR2A,RB1,EPB4.2,SCIN,RELB,THPO,SPP1,HCLS1,TLR4,CEBPA,PKNOX1 |
| GO:0002274             | -0.2926996 | 0       | 0   | 53              | myeloid leukocyte activation                              | BCL10,LAT2,RORA,CD2,CD74,PRAM1,PRG3,TLR2,TAC4,JMJD6,HMOX1,LAT,TLR7,MIF,SFP11,NOD2,THY1,IL31RA,FCER1A,TGFB1 ,VAMP7,YWHAZ,TLR1,IL10,TLR3,TICAM1,TGFBR2,TLR9,LILRB3,SBNO2,LCP2,SPACA3,CSF2,TLR6,DHRS2,IL8RB,FCGR2B,FYB,FCG R3,CD93,BTK,TRAF6,AIF1,CPLX2,IRF4,SYK,MS4A2,RELB,FCER1G,SLC7A2,NDRG1,TLR4,CD48                                                                                                                                                                                                                                                                                                                                                                                                                                                                                                                                                                          |
| GO:0002573             | -0.1652394 | 0       | 0   | 69              | myeloid leukocyte differentiation                         | MITF,CSF1,PIK3R1,ESRRA,TNFRSF11B,KITL,CLEC2G,CTNNB1,CAR2,CD42,CEBPE,CARTPT,CHUK,GNAS,SFP11,TNFSF11,CSF3,TN F,IL31RA,NF1,CASP8,IL25,THOC5,TGFB1,SP3,GMPR2,IL17C,MYH9,CSF1R,TLR3,MMP9,LIF,TGFB2,ID2,CD300LF,INPP5D,PSEN2, IL3,NKX2- 3,LILRB3,ACIN1,OSTM1,GAB3,CSF2,TCFE3,RUNX1,PPARG,DHRS2,ZBTB7A,SPIB,JUN,INHBA,TRAF6,IL4,CALCA,PSEN1,CBFA2T3,I RF4,CALCR,CLEC2D,TM7SF4,INHA,KLF10,IFI204,ADAM10,RB1,RELB,TLR4,CEBPA                                                                                                                                                                                                                                                                                                                                                                                                                                                             |
| GO:0050709             | -0.39066   | 0       | 0   | 12              | negative regulation of protein secretion                  | APOA2,SRGN,INS2,TNF,FOXP3,SERGEF,IL10,APOA1,CIDEA,TNFRSF4,DPH3,TNFSF4                                                                                                                                                                                                                                                                                                                                                                                                                                                                                                                                                                                                                                                                                                                                                                                                           |
| GO:0001764             | -0.3104409 | 0       | 0   | 67              | neuron migration                                          | PEX13,ITGA3,FEZF1,FYN,NKX2- 1,PEX2,PEX7,CCKAR,NR2F1,TLX3,PEX5,CCR4,BARHL2,PAFAH1B1,CDK5,NTN1,NR2F2,NDN,ESR2,DNER,GFRA3,PAX6,BARHL1,AL KBH1,MYH10,NAV1,YWHAE,APBB2,DCC,ASZ1,KATNA1,CDK5R1,APBB1,TWIST1,LMX1B,MET,PRRX1,NDEL1,ARX,RELN,NEURO G2,DCLK1,CFTR,TOP2B,GJA1,PHOX2B,CNTN2,MDGA1,PTK2,SOX1,CCK,CXCR4,VAX1,PSEN1,CAV2,NRCAM,CXCL12,CTTNBP2,NE UROD4,DCX,ROBO3,CHL1,DAB1,PRKG1,ATOH1,ASCL1,WNT2                                                                                                                                                                                                                                                                                                                                                                                                                                                                             |
| GO:0006911             | -0.3281612 | 0       | 0   | 12              | phagocytosis, engulfment                                  | GULP1,ELMO1,ABCA1,DOCK1,CLEC7A,VAMP7,FCGR2B,FCGR3,SIRPA,MFGE8,FCGR1,FCER1G                                                                                                                                                                                                                                                                                                                                                                                                                                                                                                                                                                                                                                                                                                                                                                                                      |
| GO:0045026             | -0.6569414 | 0       | 0   | 25              | plasma membrane fusion                                    | ITGA3,CAST,CD9,TIE1,CAPN2,CATSPER1,CD44,STX2,KCNH1,CACNA1S,IZUMO1,HYAL4,MYH9,CDON,ADAM2,NEO1,NTN2L,DYR K1B,CACNA1H,ADAM1A,CRISP1,SERPINA5,HYAL5,SPAM1,ADAM12                                                                                                                                                                                                                                                                                                                                                                                                                                                                                                                                                                                                                                                                                                                    |
| GO:0030168             | -0.4012486 | 0       | 0   | 30              | platelet activation                                       | L3MBTL4,VWF,CD9,GP1BA,FGF,CD3A1,IL11,EVL,APOE,FGA,P2RY12,TREML1,PDNP,PDGFA,GNA13,PDGFB,P2RX1,CD40,F2,PF 4,PLSCR1,FGG,PPBP,CD40LG,ENTPD2,ADAMTS13,F2R,PIK3CB,ENTPD1,SAA1                                                                                                                                                                                                                                                                                                                                                                                                                                                                                                                                                                                                                                                                                                         |
| GO:0002821             | -0.5033375 | 0       | 0   | 24              | positive regulation of adaptive immune response           | TNFSF13B,PNP1,TNFRSF13C,IL12A,NOD2,FCER1A,TRAF2,FOXP3,MALT1,C3,IL27RA,FCER2A,P2RX7,FCGR3,TRAF6,HSPA1A,MAP 3K7,PTPRC,CD24A,FCGR1,SASH3,CD1D2,CD1D1,FCER1G                                                                                                                                                                                                                                                                                                                                                                                                                                                                                                                                                                                                                                                                                                                        |
| GO:0046638             | -0.5790531 | 0       | 0   | 17              | positive regulation of alpha-beta T cell differentiation  | IL4RA,PNP1,ITPKB,AP3D1,ZAP70,FOXP3,SOC5,TGFB2,AP3B1,IL6,SYK,CD80,HLX,SASH3,CD86,IL2RG,CD1D1                                                                                                                                                                                                                                                                                                                                                                                                                                                                                                                                                                                                                                                                                                                                                                                     |
| GO:0002714             | -0.6735315 | 0       | 0   | 8               | positive regulation of B cell mediated immunity           | NOD2,FCER1A,C3,FCER2A,FCGR3,PTPRC,FCGR1,FCER1G                                                                                                                                                                                                                                                                                                                                                                                                                                                                                                                                                                                                                                                                                                                                                                                                                                  |
| GO:0032270             | -0.1716733 | 0       | 0   | 134             | positive regulation of cellular protein metabolic process | DOCK7,BRCA1,AKTIP,DSTN,BMP2,EPO,RAC1,SAMD4,BCL10,UBE2N,IFT88,LYN,PPP2R4,CD42EP2,KRT17,GCLC,PEMT,STUB1,C D81,IGF1,MAPK3,KITL,CLCF1,EP300,BARHL2,CCND1,VEGFC,INS2,IFT52,IL11,RHOA,ARF6,MAP3K1,CDK4,BMP4,TKN2,DAZL,ED NRB,FGFR3,IL2,APOE,IL12A,NCK1,AURKAIP1,CD4,NOD2,TNF,THY1,IL31RA,KATNB1,OSM,FCER1A,CDKN1B,PPARGC1A,SQSTM1 ,TGFB1,EIF5A,IL1B,AKT1,FOXP3,TGFA,TGDF1,LRRK2,MAPK1,SH2D1B1,CD42EP5,FMN1,BOLL,CARD14,LIF,CLN6,MEN1,ASZ1,IL 3,CAV1,BMPR2,EIF2B5,IL20,CSF2,AGTR1A,PDGFRB,IL6,DLG1,F2,CCND3,ADORA1,UBE2D1,P2RX7,CD3E,RGMA,CFTR,NCK2,TPP P,IL5,CD28,FGF2,IL4,PRKCA,DOK7,RB1CC1,SCAP,EDNRA,CCK,TNFRSF14,ATG7,MAPK8,ADIPOQ,PSEN1,PAWR,ATG10,PTK2B,CA V2,SYK,CTTNBP2,NHLRC1,PSRC1,CCND2,CAV3,IGH- 6,CD24A,CD80,DLCL1,CFL1,ACVR2A,BCL3,SH2D1B2,MAP2K4,F2R,UCN,ITLN1,MAPT,HCLS1,TLR4,WNT2                                                                                    |

**Table S2B. Gene sets down-regulated by mild stress plus morphine**

| Gene Ontology category | Score      | p-value | FDR | Gene set length | Gene_set_description                                                  | Gene_set_genes                                                                                                                                                                                                                                                                                                                                                                                                                                                                                                                                                                                                                                                                                                                                                                                                           |
|------------------------|------------|---------|-----|-----------------|-----------------------------------------------------------------------|--------------------------------------------------------------------------------------------------------------------------------------------------------------------------------------------------------------------------------------------------------------------------------------------------------------------------------------------------------------------------------------------------------------------------------------------------------------------------------------------------------------------------------------------------------------------------------------------------------------------------------------------------------------------------------------------------------------------------------------------------------------------------------------------------------------------------|
| GO:0045807             | -0.2712925 | 0       | 0   | 30              | positive regulation of endocytosis                                    | CD47,LDLRAP1,GATA2,PPT1,CALY,SFTPD,CD63,CLEC7A,CD209B,CBL1,ACTN4,C3,MIB1,CAV1,KIF3A,SPACA3,AHSG,FCGR2B,FCGR3,SIRPA,PTX3,PTK2,NEDD4L,CBL,FGF10,MFGE8,IGH-6,FCGR1,SIRPB1,FCER1G                                                                                                                                                                                                                                                                                                                                                                                                                                                                                                                                                                                                                                            |
| GO:0043123             | -0.1582868 | 0       | 0   | 93              | positive regulation of I-kappaB kinase/NF-kappaB cascade              | NDFIP2,VAPA,BCL10,UBE2N,GPR177,TRAF3IP2,TGM2,BST2,TBK1,LGALS9,TSPAN6,LTBR,NDFIP1,ZDHHC17,GPR89,HMOX1,RHOA,BIRC2,ECT2,SLC35B2,TNFSF10,CC2D1A,PPM1A,NUP62,LGALS1,GOLT1B,FKBP1A,RPL17,TMED4,MYD88,TRIM13,NOD2,TNFCASP8,TFG,UBE2V1,LPAR1,IL1B,TMEM9B,NOD1,LTA,MAP3K3,MIER1,RHOC,SLC20A1,MALT1,CANT1,TLR3,TICAM1,PPP5C,SECTM1A,HTR2B,FADD,LITAF,CARD11,SLC44A2,ATP2C1,SHISA5,EEF1D,RIPK1,CD40,TRIM38,ZDHHC13,TLR6,MIB2,TNFRSF10B,FASL,PLK2,MAP3K7IP2,MUL1,RIPK2,REL,TRAF6,NEK6,GJA1,MAP3K7,TRAF5,ADIPOQ,FLNA,IKBKE,TNFRSF1A,TRADD,PLEKHG5,PDCD11,F2R,CFLAR,TICAM2,RELA,ECM1,CARD9,CASP1,TLR4,TMEM101                                                                                                                                                                                                                          |
| GO:0002699             | -0.5388572 | 0       | 0   | 36              | positive regulation of immune effector process                        | BCL10,PNP1,IL12B,KLRB1C,IL13RA1,IL12A,NOD2,FCER1A,TRAF2,FOXP3,MALT1,C3,SH2D1A,IL21,LAG3,FOXP1,FCER2A,P2RX7,FCGR3,TRAF6,HSPA1A,MAP3K7,KLRK1,CRTAM,SYK,CADM1,PTPRC,CD24A,KLRE1,MS4A2,IL13,FCGR1,SASH3,CD1D2,CD1D1,FCE R1G                                                                                                                                                                                                                                                                                                                                                                                                                                                                                                                                                                                                  |
| GO:0050716             | -0.456757  | 0       | 0   | 8               | positive regulation of interleukin-1 secretion                        | NLRP3,PYCARD,IFNG,NOD2,NLRP2,P2RX7,PANX1,SAA1                                                                                                                                                                                                                                                                                                                                                                                                                                                                                                                                                                                                                                                                                                                                                                            |
| GO:0001912             | -0.5437822 | 0       | 0   | 16              | positive regulation of leukocyte mediated cytotoxicity                | PNP1,IL12B,KLRB1C,IL12A,SH2D1A,IL21,LAG3,P2RX7,HSPA1A,KLRK1,CRTAM,CADM1,PTPRC,KLRE1,CD1D2,CD1D1                                                                                                                                                                                                                                                                                                                                                                                                                                                                                                                                                                                                                                                                                                                          |
| GO:0002705             | -0.5285613 | 0       | 0   | 30              | positive regulation of leukocyte mediated immunity                    | PNP1,IL12B,KLRB1C,IL12A,NOD2,FCER1A,TRAF2,FOXP3,MALT1,C3,SH2D1A,IL21,LAG3,FCER2A,P2RX7,FCGR3,TRAF6,HSPA1A,MAP3K7,KLRK1,CRTAM,CADM1,PTPRC,CD24A,KLRE1,FCGR1,SASH3,CD1D2,CD1D1,FCER1G                                                                                                                                                                                                                                                                                                                                                                                                                                                                                                                                                                                                                                      |
| GO:0002708             | -0.5285613 | 0       | 0   | 30              | positive regulation of lymphocyte mediated immunity                   | PNP1,IL12B,KLRB1C,IL12A,NOD2,FCER1A,TRAF2,FOXP3,MALT1,C3,SH2D1A,IL21,LAG3,FCER2A,P2RX7,FCGR3,TRAF6,HSPA1A,MAP3K7,KLRK1,CRTAM,CADM1,PTPRC,CD24A,KLRE1,FCGR1,SASH3,CD1D2,CD1D1,FCER1G                                                                                                                                                                                                                                                                                                                                                                                                                                                                                                                                                                                                                                      |
| GO:0031116             | -1.3615315 | 0       | 0   | 11              | positive regulation of microtubule polymerization                     | CDKN1B,ASZ1,CAV1,CFTR,MAPK8,CAV2,CTTNBP2,PSRC1,CAV3,MAPT,WNT2                                                                                                                                                                                                                                                                                                                                                                                                                                                                                                                                                                                                                                                                                                                                                            |
| GO:0031112             | -1.1941082 | 0       | 0   | 12              | positive regulation of microtubule polymerization or depolymerization | KATNB1,CDKN1B,ASZ1,CAV1,CFTR,MAPK8,CAV2,CTTNBP2,PSRC1,CAV3,MAPT,WNT2                                                                                                                                                                                                                                                                                                                                                                                                                                                                                                                                                                                                                                                                                                                                                     |
| GO:0050766             | -0.4670392 | 0       | 0   | 17              | positive regulation of phagocytosis                                   | CD47,GATA2,SFTPD,CLEC7A,CD209B,C3,SPACA3,AHSG,FCGR2B,FCGR3,SIRPA,PTX3,PTK2,MFGE8,FCGR1,SIRPB1,FCER1G                                                                                                                                                                                                                                                                                                                                                                                                                                                                                                                                                                                                                                                                                                                     |
| GO:0042327             | -0.1861153 | 0       | 0   | 72              | positive regulation of phosphorylation                                | DOCK7,AKTIP,BMP2,EPO,APLN,BCL10,LYN,GLMN,CD81,IGF1,KITL,CLCF1,CCND1,VEGFC,IL11,BMP4,TKN2,EDNRB,FGFR3,IL2,IL12A,CD4,NOD2,TNF,THY1,IL131RA,OSM,FCER1A,SQSTM1,IL1B,TGFA,TDGF1,SH2D1B1,ANG,CARD14,LIF,EREG,EGFR,IL3,GRK1,BMPR2,IL20,CSF2,IL6,CCND3,P2RX7,CD3E,RGMA,IL5,FGF2,IL4,PRKCA,DOK7,RB1CC1,EDNRA,CCK,TNFRSF14,ADIPOQ,PSEN1,AREG,SYK,CCND2,IGH-6,CD24A,CD80,ACVR2A,SH2D1B2,MAP2K4,EGF,ITLN1,HCLS1,TLR4                                                                                                                                                                                                                                                                                                                                                                                                                 |
| GO:0001934             | -0.2100468 | 0       | 0   | 63              | positive regulation of protein amino acid phosphorylation             | DOCK7,AKTIP,BMP2,EPO,LYN,CD81,IGF1,KITL,CLCF1,CCND1,VEGFC,IL11,BMP4,TKN2,EDNRB,FGFR3,IL2,IL12A,CD4,NOD2,TNF,THY1,IL131RA,OSM,FCER1A,SQSTM1,IL1B,TGFA,TDGF1,SH2D1B1,CARD14,LIF,IL3,BMPR2,IL20,CSF2,IL6,CCND3,P2RX7,CD3E,RGMA,IL5,FGF2,IL4,PRKCA,DOK7,RB1CC1,EDNRA,CCK,TNFRSF14,ADIPOQ,PSEN1,SYK,CCND2,IGH-6,CD24A,CD80,ACVR2A,SH2D1B2,MAP2K4,ITLN1,HCLS1,TLR4                                                                                                                                                                                                                                                                                                                                                                                                                                                             |
| GO:0051247             | -0.1695103 | 0       | 0   | 140             | positive regulation of protein metabolic process                      | DOCK7,FAF1,BRCA1,AKTIP,DSTN,BMP2,EPO,RAC1,SAMD4,BCL10,UBE2N,IFT88,EGLN2,LYN,PPP2R4,CDC42EP2,KRT17,GCLC,PEMT,STUB1,CD81,IGF1,MAPK3,KITL,CLCF1,EP300,BARHL2,CCND1,VEGFC,INS2,IFT52,IL11,RHOA,ARF6,MAP3K1,CDK4,BMP4,TNFK2,DAZL,EDNRB,FGFR3,IL2,APOE,IL12A,NCK1,AURKAIP1,CD4,NOD2,TNF,THY1,IL131RA,KATNB1,OSM,FCER1A,CDKN1B,PPARGC1A,SQSTM1,TGFB1,EIF5A,IL1B,AKT1,FOXP3,TGFA,TDGF1,LRRK2,MAPK1,SH2D1B1,CDC42EP5,FMN1,BOLL,CARD14,LIF,CLN6,MEN1,ASZ1,IL3,CAV1,BMPR2,EIF2B5,IL20,CSF2,AGTR1A,BARD1,PDGFRB,IL6,SGSM3,DLG1,F2,CCND3,ADORA1,UBE2D1,P2RX7,CD3E,RGMA,CFTR,NCK2,TPPP,IL5,CD28,FGF2,IL4,GJA1,PRKCA,DOK7,RB1CC1,SCAP,EDNRA,CCK,TNFRSF14,ATG7,MAPK8,ADIPOQ,PSEN1,PAWR,ATG10,PTK2B,CAV2,WFS1,SYK,CTTNBP2,NHLRC1,PSRC1,CCND2,CAV3,IGH-6,CD24A,CD80,DL1,CFL1,ACVR2A,BCL3,SH2D1B2,MAP2K4,F2R,UCN,ITLN1,MAPT,HCLS1,TLR4,WNT2 |
| GO:0031401             | -0.164144  | 0       | 0   | 79              | positive regulation of protein modification process                   | DOCK7,BRCA1,AKTIP,BMP2,EPO,BCL10,UBE2N,LYN,PPP2R4,STUB1,CD81,IGF1,KITL,CLCF1,CCND1,VEGFC,IL11,BMP4,TKN2,EDNRB,FGFR3,IL2,IL12A,CD4,NOD2,TNF,THY1,IL131RA,OSM,FCER1A,PPARGC1A,SQSTM1,TGFB1,IL1B,FOXP3,TGFA,TDGF1,LRRK2,SH2D1B1,CARD14,LIF,MEN1,IL3,BMPR2,IL20,CSF2,IL6,CCND3,ADORA1,UBE2D1,P2RX7,CD3E,RGMA,IL5,FGF2,IL4,PRKCA,DOK7,RB1CC1,EDNRA,CCK,TNFRSF14,ATG7,ADIPOQ,PSEN1,ATG10,SYK,NHLRC1,CCND2,IGH-6,CD24A,CD80,DL1,ACVR2A,SH2D1B2,MAP2K4,ITLN1,HCLS1,TLR4                                                                                                                                                                                                                                                                                                                                                          |
| GO:0002711             | -0.6914898 | 0       | 0   | 14              | positive regulation of T cell mediated immunity                       | PNP1,IL12A,TRAF2,FOXP3,MALT1,P2RX7,TRAF6,HSPA1A,MAP3K7,PTPRC,CD24A,SASH3,CD1D2,CD1D1                                                                                                                                                                                                                                                                                                                                                                                                                                                                                                                                                                                                                                                                                                                                     |
| GO:0051324             | -1.2314493 | 0       | 0   | 12              | prophase                                                              | FBXO5,EHMT2,MLH1,SYCP2,SYCE1,RAD1,PIWIL2,MSH5,PRDM9,OVOL1,SYCE2,FKBP6                                                                                                                                                                                                                                                                                                                                                                                                                                                                                                                                                                                                                                                                                                                                                    |
| GO:0044256             | -0.1903085 | 0       | 0   | 24              | protein digestion                                                     | ACE,MMP2,MMP10,ACE2,MMP8,ADAMTS14,MMP19,MMP13,MMP27,PEPD,MMP9,PRSS2,PRTN3,MMP1B,MMP14,ADAMTS3,P2RX7,KLK6,MMP16,MMP7,MMP1A,MMP3,MMP11,ADAMTS2                                                                                                                                                                                                                                                                                                                                                                                                                                                                                                                                                                                                                                                                             |



**Table S2B. Gene sets down-regulated by mild stress plus morphine**

| Gene Ontology category | Score      | p-value | FDR | Gene set length | Gene_set_description                                          | Gene_set_genes                                                                                                                                                                                                                                                                                                                                                                                                                                                                                                                                                                                                                                                                                                                                                                                                                                                                                                                                                                                                                                                                                                                                                                                                                                      |
|------------------------|------------|---------|-----|-----------------|---------------------------------------------------------------|-----------------------------------------------------------------------------------------------------------------------------------------------------------------------------------------------------------------------------------------------------------------------------------------------------------------------------------------------------------------------------------------------------------------------------------------------------------------------------------------------------------------------------------------------------------------------------------------------------------------------------------------------------------------------------------------------------------------------------------------------------------------------------------------------------------------------------------------------------------------------------------------------------------------------------------------------------------------------------------------------------------------------------------------------------------------------------------------------------------------------------------------------------------------------------------------------------------------------------------------------------|
| GO:0009306             | -0.1839066 | 0       | 0   | 70              | protein secretion                                             | APOA2,ARFIP1,BACE2,LAX1,LYN,TRAF3IP2,SRGN,NLRP3,GLMN,PYCARD,ACHE,ABCA1,ERP29,TNFSF13B,PRKCO,SCG2,NLRC4,ARL4D,VEGFC,INS2,CD27,POU2F2,IFNG,ADORA2A,GNAS,IL2,PLA2G1B,NOD2,TNF,LTBP2,ARFGAP3,CANX,GNPTAB,TRAF2,FOXP3,TNFSF15,NLRP2,SERGEF,ANG,PPY,IL10,KCNN4,APOA1,LCP2,DNAJC1,AGTR1A,CD40,P2RX7,STEAP3,CIDEA,KRT20,CXCL10,TRAF6,CRTAM,CADM1,NECAB3,PCSK5,TNFRSF4,CD40LG,MS4A2,PDIA4,IL13,PANX1,LMF1,F2RL1,EGF,MON1A,DPH3,TNFSF4,SAI1                                                                                                                                                                                                                                                                                                                                                                                                                                                                                                                                                                                                                                                                                                                                                                                                                   |
| GO:0002819             | -0.397189  | 0       | 0   | 33              | regulation of adaptive immune response                        | TNFSF13B,PNP1,TNFRSF13C,IL12A,NOD2,STAT6,FCER1A,IL7R,FOXJ1,SPN,TRAF2,FOXP3,MALT1,C3,IL27RA,PPP3CB,FCER2A,FCGR2B,P2RX7,FCGR3,PTPN6,TRAF6,HSPA1A,MAP3K7,DPP4,BCL6,PTPRC,CD24A,FCGR1,SASH3,CD1D2,CD1D1,FCER1G                                                                                                                                                                                                                                                                                                                                                                                                                                                                                                                                                                                                                                                                                                                                                                                                                                                                                                                                                                                                                                          |
| GO:0046634             | -0.6226827 | 0       | 0   | 32              | regulation of alpha-beta T cell activation                    | BLM,BTLA,IL4RA,PNP1,ITPKB,AP3D1,ZAP70,SHH,FOXP3,EBI3,SOC55,TGFBR2,AP3B1,IL27,IL6,CD3E,CD28,TNFRSF14,IL12RB2,IRF4,SYK,BCL6,PTPRC,RC3H1,CD24A,CD80,HLX,SASH3,CD86,IL2RG,CD1D2,CD1D1                                                                                                                                                                                                                                                                                                                                                                                                                                                                                                                                                                                                                                                                                                                                                                                                                                                                                                                                                                                                                                                                   |
| GO:0046637             | -0.6267105 | 0       | 0   | 23              | regulation of alpha-beta T cell differentiation               | IL4RA,PNP1,ITPKB,AP3D1,ZAP70,SHH,FOXP3,SOC55,TGFBR2,AP3B1,IL27,IL6,IL12RB2,IRF4,SYK,BCL6,RC3H1,CD80,HLX,SASH3,CD86,IL2RG,CD1D1                                                                                                                                                                                                                                                                                                                                                                                                                                                                                                                                                                                                                                                                                                                                                                                                                                                                                                                                                                                                                                                                                                                      |
| GO:0050878             | -0.2726188 | 0       | 0   | 140             | regulation of body fluid levels                               | FBN1,EDN1,F5,ITGB3,PTGER3,EFEMP2,APLN,DRD2,L3MBTL4,FBLN5,VWF,CD9,SCUBE1,P2RY1,GP1BA,RLN1,AVPR2,NPPA,TAC4,FGF,PDSS2,NPR1,COL3A1,TSC22D3,F2RL2,HSD11B2,SERPINE1,IL11,OXT,CD36,EVL,SERPING1,ADORA2A,APOH,GP5,ITGA2,APOE,SERPINF2,FGA,P2RY12,TREML1,OTOG,RAB27A,F13B,ANXA5,F12,SCT,KCNMA1,F13A1,PLSCR4,AGTRL1,F11,CYP11B2,MST1,F2RL3,PLAT,GUCA1B,NPPB,PABPC4,PDPN,LMAN1,CPB2,TMPRSS6,IL10RB,C3,TRP73,PDGFA,KCNN4,KNG1,C9,KRT1,SLC22A4,AVP,ANXA2,GNA13,F8,CAV1,PDGFB,WAS,P2RX1,TFPI2,CD40,PLAUR,COPA,F2,VKORC1,FLI1,NFE2,F7,PROS1,ANXA8,PF4,CFTR,F3,GGCX,HPS4,PROC,SCNN1A,ANXA7,HGF,SLC34A1,SLC22A2,F10,MMRN1,PLSCR1,TSPAN8,WFS1,FGG,GNAQ,IL20RA,PPBP,SERPINC1,FOXA2,TFPI,CD40LG,NPR3,PROZ,CEL,ENTPD2,ADAMTS13,F9,PLG,GNA12,F2RL1,HNF4A,F2R,PIK3CB,UCN,ENTPD1,VIP,SERPIND1,PLAU,PROCR,CLCNKA,GUCA2B,THBD,AVPR1A,GP9,SERPINA5,SAI1                                                                                                                                                                                                                                                                                                                                                                                                                        |
| GO:0043370             | -1.0183523 | 0       | 0   | 14              | regulation of CD4-positive, alpha beta T cell differentiation | IL4RA,FOXP3,SOC55,IL27,IL6,IL12RB2,IRF4,BCL6,RC3H1,CD80,HLX,SASH3,CD86,IL2RG                                                                                                                                                                                                                                                                                                                                                                                                                                                                                                                                                                                                                                                                                                                                                                                                                                                                                                                                                                                                                                                                                                                                                                        |
| GO:0045595             | -0.1301296 | 0       | 0   | 343             | regulation of cell differentiation                            | BMPR1B,SMAD3,TWIST2,RSK2,ZFP36,KLF4,BMP6,PLEKHB1,CDK5RAP3,BMP2,DICER1,IAPP,MITF,MAFF,HMGB3,REST,CRX,PPP2CA,NELL1,CSF1,MEIS1,PRPF19,LMX1A,CCNE1,ISL1,NOTCH3,FOXO3A,CLPTM1,STAT5B,MAF,CD2,ROD1,PIK3R1,CD74,ASPM,NODAL,WNT3,GPR98,BMP7,MYOCD,IGF1,UNCX,PPARD,IGFBP3,IQCB1,ID4,HIF1A,VWV2,ZFH3,SMAD1,ESRRA,HSF4,SMAP1,SMAD5,COMMDS,ITGB1,TNFRSF11B,KITL,TLX3,SOX2,PBX1,CLEC2G,ESRRB,CTNNA1,HES1,IL4RA,BARHL2,PNP1,FGF9,MBNL3,CAR2,WNT9A,APOLD1,ENPP3,NRG1,TBX5,ITPKB,NKX2-2,EPC1,GLP1R,ID3,LBX1,ERBB2,CLU,RHOA,TOB1,ACVR2B,CD27,POU5F1,CNTN4,CARTPT,BAD,LIG4,SIX2,NKX6-2,DLX5,BMP4,BCL2,AP3D1,GNAS,ENPP1,HES5,ZFP488,TGFB11,BEX1,PRLR,NEUROG3,FGFR3,IL2,WNT4,ZAP70,BMPR1A,POU3F2,EZH2,SFPI1,TNFSF11,UNCX2,SOC3,FZD1,SNF1LK,FAS,IRX3,IL2RA,TNF,NOG,HOXA2,TAFA8,JAK2,NF1,IL7R,NOTCH4,ASPA,GHR,FOXJ1,TGFB3,NPHP3,THOC5,CUL7,GDF5,FGF4,SIX1,LCK,PAX6,GLI3,BC054059,SART1,RCAN1,USH2A,SHH,NOTCH2,TGFB2,GDF11,FOXP3,RIF1,LPIN1,LTBP4,PRDM6,SPOCK2,H2-DMA,DLL3,MAPK1,PAX4,TIMP2,PLA2G2A,4930525M21RIK,HOXA7,TCFL5,NPPC,H2-AA,STAT5A,CDKN2B,TRP73,CSF1R,TERC,BOC,FADS1,MIB1,WNT3A,JAG2,SOC55,TLR3,IL7,LIF,TGFBR2,TCL1,ERE,ACVR1B,ID2,ICREM,DRD2,CHRN2B,PMCH,OPN3,TIMELESS,DRD1A,ADORA2A,ADA,OPN4,ALB,IL6,ADORA1,DRD3,CREB1,CSNK1E,NPY2R,PGLYR1,CORT,PTGDS,ARNTL |
| GO:0042752             | -0.5775843 | 0       | 0   | 21              | regulation of circadian rhythm                                | CREM,DRD2,CHRN2B,PMCH,OPN3,TIMELESS,DRD1A,ADORA2A,ADA,OPN4,ALB,IL6,ADORA1,DRD3,CREB1,CSNK1E,NPY2R,PGLYR1,CORT,PTGDS,ARNTL                                                                                                                                                                                                                                                                                                                                                                                                                                                                                                                                                                                                                                                                                                                                                                                                                                                                                                                                                                                                                                                                                                                           |
| GO:0043122             | -0.1166718 | 0       | 0   | 101             | regulation of I-kappaB kinase/NF-kappaB cascade               | NDFIP2,VAPA,BCL10,UBE2N,GPR177,TRAF3IP2,RHOH,TGM2,BST2,PPARD,TBK1,LGALS9,SPAN6,LTBR,NDFIP1,ZDHHC17,GPR89,HMOX1,RHOA,BIRC2,ECT2,SLC35B2,TNFSF10,CC2D1A,PPM1A,NUP62,LGALS1,GOLT1B,FKBP1A,RPL17,TMED4,MYD88,TRIM13,NOD2,TNF,CASP8,TFG,UBE2V1,SQSTM1,LPAR1,IL1B,TMEM9B,NOD1,LTA,MAP3K3,MIER1,RHOC,SLC20A1,IL1RL1,IKKB,MAIT1,CANT1,TLR3,TICAM1,PPP5C,SECTM1A,HTR2B,FADD,LITAF,CARD11,CARD6,SLC44A2,ATP2C1,TNFAIP3,SHISA5,EEF1D,RIPK1,CD40,TRIM38,ZDHHC13,TLR6,MIB2,TNFRSF10B,OTUD7B,FASL,PLK2,MAP3K7IP2,MUL1,RIPK2,REL,TRAF6,NEK6,GJA1,MAP3K7,TRAF5,ADIPOQ,FLNA,IKBKE,TNFRSF1A,TRADD,PLEKHG5,PDCC11,F2R,CFLAR,TICAM2,RELA,ECM1,CARD9,CASP1,TLR4,TMEM101                                                                                                                                                                                                                                                                                                                                                                                                                                                                                                                                                                                                  |
| GO:0002889             | -0.5098584 | 0       | 0   | 11              | regulation of immunoglobulin mediated immune response         | NOD2,FCER1A,FOXJ1,C3,FCER2A,FCGR2B,FCGR3,PTPN6,PTPRC,FCGR1,FCER1G                                                                                                                                                                                                                                                                                                                                                                                                                                                                                                                                                                                                                                                                                                                                                                                                                                                                                                                                                                                                                                                                                                                                                                                   |
| GO:0045088             | -0.3182163 | 0       | 0   | 35              | regulation of innate immune response                          | BCL10,NCR1,TLR2,IL12B,ERAP1,KLRB1C,TLR7,IL12A,MYD88,CLEC7A,NOD2,SH2D1B1,H2-BL,TLR1,SH2D1A,TLR3,TICAM1,ERE,IL21,LAG3,TLR9,TLR6,KLRK1,CRTAM,TLR8,KLRB1B,IFNB1,UNC93B1,CADM1,CLEC2D,KLRE1,SH2D1B2,IFNK,CARD9,TLR4                                                                                                                                                                                                                                                                                                                                                                                                                                                                                                                                                                                                                                                                                                                                                                                                                                                                                                                                                                                                                                      |
| GO:0050704             | -0.3897596 | 0       | 0   | 9               | regulation of interleukin-1 secretion                         | NLRP3,PYCARD,IFNG,NOD2,NLRP2,APOA1,P2RX7,PANX1,SAI1                                                                                                                                                                                                                                                                                                                                                                                                                                                                                                                                                                                                                                                                                                                                                                                                                                                                                                                                                                                                                                                                                                                                                                                                 |
| GO:0001910             | -0.4567869 | 0       | 0   | 24              | regulation of leukocyte mediated cytotoxicity                 | NCR1,PNP1,IL12B,KLRB1C,IL12A,IL7R,SH2D1B1,H2-BL,SH2D1A,IL21,LAG3,PPP3CB,P2RX7,HSPA1A,KLRK1,CRTAM,KLRB1B,CADM1,CLEC2D,PTPRC,KLRE1,SH2D1B2,CD1D2,CD1D1                                                                                                                                                                                                                                                                                                                                                                                                                                                                                                                                                                                                                                                                                                                                                                                                                                                                                                                                                                                                                                                                                                |
| GO:0002703             | -0.4387959 | 0       | 0   | 43              | regulation of leukocyte mediated immunity                     | NCR1,PNP1,IL12B,KLRB1C,IL12A,NOD2,FCER1A,IL7R,FOXJ1,SPN,TRAF2,FOXP3,SH2D1B1,H2-BL,MALT1,C3,SH2D1A,IL21,LAG3,PPP3CB,FCER2A,FCGR2B,P2RX7,FCGR3,PTPN6,TRAF6,HSPA1A,MAP3K7,KLRK1,CRTAM,KLRB1B,DPP4,CADM1,CLEC2D,PTPRC,CD24A,KLRE1,FCGR1,SH2D1B2,SASH3,CD1D2,CD1D1,FCER1G                                                                                                                                                                                                                                                                                                                                                                                                                                                                                                                                                                                                                                                                                                                                                                                                                                                                                                                                                                                |

**Table S2B. Gene sets down-regulated by mild stress plus morphine**

| Gene Ontology category | Score      | p-value | FDR | Gene set length | Gene_set_description                                       | Gene_set_genes                                                                                                                                                                                                                                                                                                                                                                                                                                                                                                                                                                                                                                                                                                                                                                                                                                        |
|------------------------|------------|---------|-----|-----------------|------------------------------------------------------------|-------------------------------------------------------------------------------------------------------------------------------------------------------------------------------------------------------------------------------------------------------------------------------------------------------------------------------------------------------------------------------------------------------------------------------------------------------------------------------------------------------------------------------------------------------------------------------------------------------------------------------------------------------------------------------------------------------------------------------------------------------------------------------------------------------------------------------------------------------|
| GO:0002706             | -0.4387959 | 0       | 0   | 43              | regulation of lymphocyte mediated immunity                 | NCR1,PNP1,IL12B,KLRB1C,IL12A,NOD2,FCER1A,IL7R,FOXJ1,SPN,TRAF2,FOXP3,SH2D1B1,H2-BL,MALT1,C3,SH2D1A,IL21,LAG3,PPP3CB,FCER2A,FCGR2B,P2RX7,FCGR3,PTPN6,TRAF6,HSPA1A,MAP3K7,KLRK1,CRTAM,KLRB1B,DPP4,CADM1,CLEC2D,PTPRC,CD24A,KLRE1,FCGR1,SH2D1B2,SASH3,CD1D2,CD1D1,FCER1G                                                                                                                                                                                                                                                                                                                                                                                                                                                                                                                                                                                  |
| GO:0031114             | -0.4114866 | 0       | 0   | 15              | regulation of microtubule depolymerization                 | MTAP1A,MAP6D1,CLASP2,HDAC6,TRIM54,KATNB1,MTAP2,MID1IP1,MID1,MTAP4,APC,ARHGEF2,CLIP2,MAPT,CLASP1                                                                                                                                                                                                                                                                                                                                                                                                                                                                                                                                                                                                                                                                                                                                                       |
| GO:0031113             | -0.9310144 | 0       | 0   | 14              | regulation of microtubule polymerization                   | SGK1,STMN1,MAPRE1,CDKN1B,ASZ1,CAV1,CFTR,MAPK8,CAV2,CTTNBP2,PSRC1,CAV3,MAPT,WNT2                                                                                                                                                                                                                                                                                                                                                                                                                                                                                                                                                                                                                                                                                                                                                                       |
| GO:0050684             | -0.8623286 | 0       | 0   | 6               | regulation of mRNA processing                              | SRPK1,SAFB,BARD1,CDC2L1,MYOD1,FUSIP1                                                                                                                                                                                                                                                                                                                                                                                                                                                                                                                                                                                                                                                                                                                                                                                                                  |
| GO:0008593             | -0.6599779 | 0       | 0   | 9               | regulation of Notch signaling pathway                      | HEY2,IL6ST,DLL3,NFKBIA,TRP63,JAG1,RFNG,DTX1,KIT                                                                                                                                                                                                                                                                                                                                                                                                                                                                                                                                                                                                                                                                                                                                                                                                       |
| GO:0050730             | -0.1916278 | 0       | 0   | 58              | regulation of peptidyl-tyrosine phosphorylation            | EPO,PPP2CA,LYN,SOCS1,CD81,IGF1,KITL,CLCF1,PDGFC,IL11,TNK2,FGFR3,IL2,IL12A,PDGFD,CD4,NOD2,THY1,IL31RA,IL22RA2,OSM,IL22,TRAF3IP1,FCER1A,TDGF1,SH2D1B1,PDGFA,LIF,EGFR,PPP2R1A,IL3,CAV1,IL20,PDGFB,CSF2,ITGB2,PDGFRB,IL6,NF2,CD3E,IL5,PTPN6,IL4,PRKCA,CKK,TNFRSF14,ADIPOQ,SYK,PTPRC,IGH-6,PRKCE,CD24A,CD80,SH2D1B2,HNF4A,EGF,HCLS1,TLR4                                                                                                                                                                                                                                                                                                                                                                                                                                                                                                                   |
| GO:0050926             | -0.6888673 | 0       | 0   | 11              | regulation of positive chemotaxis                          | CDH13,VEGFA,SCG2,CXCL9,ARTN,PRKCA,CXCL12,IL16,FGF10,S1PR1,SPP1                                                                                                                                                                                                                                                                                                                                                                                                                                                                                                                                                                                                                                                                                                                                                                                        |
| GO:0032880             | -0.3353678 | 0       | 0   | 11              | regulation of protein localization                         | MYCBP2,SUMO1,CDH2,INS2,BCL2,MYO1A,RABGAP1L,CCDC100,NCKAP1,DDX4,CNPY4                                                                                                                                                                                                                                                                                                                                                                                                                                                                                                                                                                                                                                                                                                                                                                                  |
| GO:0031399             | -0.0942575 | 0       | 0   | 138             | regulation of protein modification process                 | DOCK7,BRCA1,AKTIP,BMP2,EPO,SET,SH2D1B1,PPP2CA,BCL10,UBE2N,LYN,PRKG2,PPP2R4,PRKAR2B,SOCS1,GCLC,STUB1,CD81,IGF1,IGFBP3,PRKAR2A,KITL,CLCF1,PDGFC,IMPACT,CCND1,VEGFC,BDKRB1,IL11,CCDC88A,TSC1,PPP1R14D,CDK5,BMP4,TNK2,ENPP1,RNF139,EDNRB,FGFR3,IL2,IL12A,PDGFD,SOCS3,CD4,NDUFS4,NOD2,TNF,THY1,IL31RA,IL22RA2,OSM,IL22,TRAF3IP1,FCER1A,GTPBP4,PPARGC1A,SQSTM1,CNGA1,TGFB1,IL1B,MLL1,FOXO3,TGFA,TDGF1,LRRK2,YWHAE,SH2D1B1,PDGFA,CARD14,RAPGEF3,LIF,PRKAR1A,UBQLN1,EGFR,PPP2R1A,MEN1,PSEN2,IL3,ARR3,CAV1,APOA1,BMPR2,IL20,PDGFB,CSF2,ITGB2,PDGFRB,IL6,NF2,IL10,BTK,CCND3,ADORA1,UBE2D1,P2RX7,CD3E,PRKAR1B,RGMA,JUN,IL5,PPP1R9B,PTPN6,FGF2,IL4,PRKCA,DOK7,RB1CC1,EDNRA,CK,CD6,TNFRSF14,ARRB2,ATG7,ADIPOQ,PSEN1,ATG10,RAPGEF4,CCDC88C,PAX5,SYK,MSX3,NHLRC1,CCND2,PTPRC,IGH-6,PRKCE,CD24A,ATG5,CD80,DLC1,ACVR2A,SH2D1B2,MAP2K4,HNF4A,EGF,PRKG1,ITLN1,HCLS1,TLR4 |
| GO:0050708             | -0.2468467 | 0       | 0   | 41              | regulation of protein secretion                            | APOA2,ARFIP1,SRGN,NLRP3,GLMN,PYCARD,ACHE,PRKCQ,VEGFC,INS2,IFNG,ADORA2A,IL2,PLA2G1B,NOD2,TNF,TRAF2,FOXP3,TNFSF15,NLRP2,SERGEF,ANG,IL10,KCNN4,APOA1,DNAJC1,CD40,P2RX7,CIDEA,KRT20,TRAF6,CRTAM,CADM1,TNFRSF4,CD40LG,IL13,PANX1,EGF,DPH3,TNFSF4,SAA1                                                                                                                                                                                                                                                                                                                                                                                                                                                                                                                                                                                                      |
| GO:0032319             | -0.2787008 | 0       | 0   | 20              | regulation of Rho GTPase activity                          | DOCK7,STMN3,ARHGAP27,CENTD2,FGD1,TSC1,PAFAH1B1,FGD2,SYDE1,FOXJ1,FGD5,FGD6,RASGRF1,FGD3,ALS2,PTK2B,BCL6,FGD4,RALBP1,SYDE2                                                                                                                                                                                                                                                                                                                                                                                                                                                                                                                                                                                                                                                                                                                              |
| GO:0001914             | -0.6538741 | 0       | 0   | 9               | regulation of T cell mediated cytotoxicity                 | PNP1,IL12A,IL7R,PPP3CB,P2RX7,HSPA1A,PTPRC,CD1D2,CD1D1                                                                                                                                                                                                                                                                                                                                                                                                                                                                                                                                                                                                                                                                                                                                                                                                 |
| GO:0002709             | -0.5399574 | 0       | 0   | 18              | regulation of T cell mediated immunity                     | PNP1,IL12A,IL7R,SPN,TRAF2,FOXP3,MALT1,PPP3CB,P2RX7,TRAF6,HSPA1A,MAP3K7,DPP4,PTPRC,CD24A,SASH3,CD1D2,CD1D1                                                                                                                                                                                                                                                                                                                                                                                                                                                                                                                                                                                                                                                                                                                                             |
| GO:0045622             | -0.9371438 | 0       | 0   | 11              | regulation of T-helper cell differentiation                | IL4RA,SOCS5,IL27,IL6,IL12RB2,IRF4,BCL6,RC3H1,CD80,HLX,CD86                                                                                                                                                                                                                                                                                                                                                                                                                                                                                                                                                                                                                                                                                                                                                                                            |
| GO:0009410             | -0.6541819 | 0       | 0   | 33              | response to xenobiotic stimulus                            | NQO1,GSTA4,HAMP,GPX1,GCLC,CYP2E1,EPHX1,UGT1A9,AS3MT,GSTP1,CYP1A1,AOX1,AKR1C12,CYP3A13,FMO4,AHR,ABC4,GSTM4,GSTA2,CYP1B1,CYP1A2,AIP,GSTM2,NR1I2,GSTA3,CYP4B1,HNF4A,ARNT2,AHRR,AKR1C13,EPHX2,CYP2F2,HAMP2                                                                                                                                                                                                                                                                                                                                                                                                                                                                                                                                                                                                                                                |
| GO:0001523             | -0.6851725 | 0       | 0   | 21              | retinoid metabolic process                                 | LRAT,ADH4,RETSAT,RARRS2,RBP1,ADH5,RBP2,DHRS3,BCO2,RDH12,DHRS9,ADH1,RDH11,RDH8,ALDH1A7,RDH1,CES6,RPE65,ADH7,DHRS4,ALDH8A1                                                                                                                                                                                                                                                                                                                                                                                                                                                                                                                                                                                                                                                                                                                              |
| GO:0007338             | -0.2826285 | 0       | 0   | 59              | single fertilization                                       | PKDRE1,SPA17,ITGA3,SYT6,HEXB,CD9,SMCP,ATP8B3,GLRA1,SYT8,NHP2L1,NPM2,ZBP2,DNAL1,OVGP1,ZP3,GLRB,ZPBP,PLCD4,AKAP4,CD46,ADAM21,B4GALT1,GNPDA1,CATSPER1,STX2,GM767,TNP1,IZUMO1,ACR,HYAL4,PLCZ1,UBXD6,TRIM36,ZP1,SPACA3,ADAM2,CLGN,IGSF8,AKAP3,TNP2,HIST1H1T,LCNG,ZAN,ADAM3,ZP2,MFGE8,ARSA,FCGBP,ZP4,WBP2NL,SPAG1,ADAM1A,ZP3R,CRISP1,SERPINA5,HYAL5,SPAM1,MST1R                                                                                                                                                                                                                                                                                                                                                                                                                                                                                             |
| GO:0043403             | -0.5379005 | 0       | 0   | 12              | skeletal muscle regeneration                               | GPX1,IGF1,SOX15,PAX7,TGFB2,PLAUR,GJA1,HOPX,MTPN,P2RX5,MYF6,PLAU                                                                                                                                                                                                                                                                                                                                                                                                                                                                                                                                                                                                                                                                                                                                                                                       |
| GO:0035036             | -0.6074821 | 0       | 0   | 19              | sperm-egg recognition                                      | SPA17,SMCP,ATP8B3,ZBP2,ZP3,ZPBP,B4GALT1,ACR,SPACA3,TNP2,HIST1H1T,ZAN,ADAM3,ZP2,ARSA,FCGBP,ADAM1A,ZP3R,SPAM1                                                                                                                                                                                                                                                                                                                                                                                                                                                                                                                                                                                                                                                                                                                                           |
| GO:0002286             | -0.7926299 | 0       | 0   | 18              | T cell activation during immune response                   | ATP7A,IL4RA,IL12B,SOCS5,PSEN2,GADD45G,IL27,IL6,IL12RB2,PSEN1,IRF4,BCL6,RC3H1,CD80,BCL3,HLX,CD86,RELB                                                                                                                                                                                                                                                                                                                                                                                                                                                                                                                                                                                                                                                                                                                                                  |
| GO:0006721             | -0.6445856 | 0       | 0   | 25              | terpenoid metabolic process                                | LRAT,ADH4,RETSAT,RARRS2,RBP1,ADH5,IDI2,RBP2,DHRS3,4833409A17RIK,BCO2,RDH12,DHRS9,ADH1,RDH11,RDH8,ID1,ALDH1A7,HMGCR,RDH1,CES6,RPE65,ADH7,DHRS4,ALDH8A1                                                                                                                                                                                                                                                                                                                                                                                                                                                                                                                                                                                                                                                                                                 |
| GO:0042093             | -0.8419297 | 0       | 0   | 16              | T-helper cell differentiation                              | ATP7A,IL4RA,IL12B,SOCS5,GADD45G,IL27,IL6,IL12RB2,IRF4,BCL6,RC3H1,CD80,BCL3,HLX,CD86,RELB                                                                                                                                                                                                                                                                                                                                                                                                                                                                                                                                                                                                                                                                                                                                                              |
| GO:0019627             | -1.5449517 | 0       | 0   | 9               | urea metabolic process                                     | ARG1,HTT,SLC25A15,OTC,ASL,NAGS,ARG2,CPS1,CEBPA                                                                                                                                                                                                                                                                                                                                                                                                                                                                                                                                                                                                                                                                                                                                                                                                        |
| GO:0007223             | -0.4822387 | 0       | 0   | 26              | Wnt receptor signaling pathway, calcium modulating pathway | WNT3,WNT10A,ROR2,CAPZA2,WNT2B,WNT9A,WNT9B,WNT10B,WNT4,WNT1,WNT8B,WNT5B,WNT3A,WNT11,ASZ1,WNT5A,MET,FZD2,WNT6,WNT7A,CAV2,CTTNBP2,WNT16,WNT7B,WNT8A,WNT2                                                                                                                                                                                                                                                                                                                                                                                                                                                                                                                                                                                                                                                                                                 |
| GO:0006805             | -0.7046797 | 0       | 0   | 29              | xenobiotic metabolic process                               | NQO1,GSTA4,HAMP,CYP2E1,EPHX1,UGT1A9,AS3MT,GSTP1,CYP1A1,AOX1,AKR1C12,CYP3A13,FMO4,AHR,GSTM4,GSTA2,CYP1B1,CYP1A2,AIP,GSTM2,NR1I2,GSTA3,CYP4B1,HNF4A,AHRR,AKR1C13,EPHX2,CYP2F2,HAMP2                                                                                                                                                                                                                                                                                                                                                                                                                                                                                                                                                                                                                                                                     |

**Table S3A. Gene sets up-regulated by severe stress plus morphine**

| Gene Ontology category | Score    | p-value | FDR | Gene set length | Gene_set_description                                        | Gene_set_genes                                                                                                                                                                                                                                                                                                                                                                                                                                                                                                                             |
|------------------------|----------|---------|-----|-----------------|-------------------------------------------------------------|--------------------------------------------------------------------------------------------------------------------------------------------------------------------------------------------------------------------------------------------------------------------------------------------------------------------------------------------------------------------------------------------------------------------------------------------------------------------------------------------------------------------------------------------|
| 50:000661              | 1.353093 | 0       | 0   | 6               | SRP-dependent cotranslational protein targeting to membrane | SRP19,SRP9,SRPR,SRP14,SRP72,VCAN                                                                                                                                                                                                                                                                                                                                                                                                                                                                                                           |
| 50:000612              | 1.26807  | 0       | 0   | 39              | mitochondrial electron transport, NADH to ubiquinone        | NDUFS6,NDUFB4,NDUFB5,NDUFS5,NDUFA1,NDUFAB1,NDUFS2,NDUFA9,NDUFS3,NDUFA2,NDUFB6,NDUFA8,NDUFA7,NDUFA5,NDUFC1,NDUFB2,NDUFB8,NDUFS1,NDUFS4,NDUFB9,NDUFB3,NDUFA10,NDUFB7,NDUFS7,NDUFV1,NDUFC2,NDUFA4,NDUFV2,DLD,NDUFA3,NDUFAF1,NDUFS8,NDUFB10,NDUFA6,ND3,ND1,BDNF,ND4L,ND6                                                                                                                                                                                                                                                                       |
| 50:000612              | 1.204142 | 0       | 0   | 4               | mitochondrial electron transport, ubiquinol to cytochrome c | UQCRB,UQCRH,UQCR,1110020P15RIK                                                                                                                                                                                                                                                                                                                                                                                                                                                                                                             |
| 50:006008              | 1.152821 | 0       | 0   | 10              | membrane hyperpolarization                                  | GRIK2,GLRA1,PARK7,GRIK1,ADORA2A,PRKCZ,NLGN3,ADIPOQ,DRD4,CHRNA4                                                                                                                                                                                                                                                                                                                                                                                                                                                                             |
| 50:000609              | 1.140369 | 0       | 0   | 25              | tricarboxylic acid cycle                                    | POLR3H,PDHB,SUCLA2,SUCLG1,MDH1,FH1,ATP5G3,IDH3B,ACO2,SDHA,SUCLG2,SDHD,SDHB,MDH1B,SDHC,IDH3A,IDH3G,IDH2,DLST,NNT,CS,MDH2,IDH1,ACO1,2610507B11RIK                                                                                                                                                                                                                                                                                                                                                                                            |
| 50:000661              | 1.129423 | 0       | 0   | 12              | cotranslational protein targeting to membrane               | SRP19,SSR3,SRP9,SRPR,SRP14,SRP72,SSR2,SSR1,ARL6IP1,TRAM1,SEC62,VCAN                                                                                                                                                                                                                                                                                                                                                                                                                                                                        |
| 50:004368              | 1.124856 | 0       | 0   | 13              | protein import into mitochondrion                           | TIMM8B,TOMM22,TIMM8A1,AIP,DNAJC19,TIMM9,HSPD1,TOMM20,GRPEL1,TIMM10,TIMM8A2,TIMM13,FXC1                                                                                                                                                                                                                                                                                                                                                                                                                                                     |
| 50:000920              | 1.080341 | 0       | 0   | 10              | deoxyribonucleoside triphosphate metabolic process          | DGUOK,RRM2B,CMPK2,NUDT15,TBPL1,DTYMK,PNP1,NUDT1,DUT,ADA                                                                                                                                                                                                                                                                                                                                                                                                                                                                                    |
| 50:004277              | 1.036352 | 0       | 0   | 49              | organelle ATP synthesis coupled electron transport          | NDUFS6,NDUFB4,NDUFB5,NDUFS5,NDUFA1,NDUFAB1,UQCRB,NDUFS2,NDUFA9,NDUFS3,NDUFA2,NDUFB6,NDUFA8,NDUFA7,UQCRH,NDUFA5,NDUFC1,NDUFB2,NDUFB8,NDUFS1,NDUFS4,UQCR,NDUFB9,NDUFB3,NDUFA10,NDUFB7,NDUFS7,NDUFV1,NDUFC2,NDUFA4,NDUFV2,DLD,COX15,NDUFA3,NDUFAF1,NDUFS8,NDUFB10,NDUFA6,ND3,1110020P15RIK,ND1,COX2,COX1,BDNF,TAZ,ND4L,ND6,COX10,COX8B                                                                                                                                                                                                        |
| 50:000906              | 1.034549 | 0       | 0   | 38              | aerobic respiration                                         | POLR3H,PDHB,SUCLA2,SUCLG1,MDH1,ME3,UQCRB,OXA1L,FH1,ADSL,UQCRC1,UQCRH,SLC25A14,ATP5G3,IDH3B,UQCRC2,ACO2,SDHA,SUCLG2,SDHD,SDHB,MDH1B,SDHC,IDH3A,IDH3G,IDH2,SURF1,DLST,NNT,CS,MDH2,CAT,COX1,IDH1,ACO1,COX10,2610507B11RIK,FXN                                                                                                                                                                                                                                                                                                                 |
| 50:000000              | 1.026994 | 0       | 0   | 10              | mitochondrial genome maintenance                            | MRPL17,RRM2B,TFAM,DNAJA3,MRPL39,MRPL15,SLC25A4,MPV17,POLG,TYMP                                                                                                                                                                                                                                                                                                                                                                                                                                                                             |
| 50:004277              | 1.002015 | 0       | 0   | 50              | ATP synthesis coupled electron transport                    | NDUFS6,NDUFB4,NDUFB5,NDUFS5,NDUFA1,NDUFAB1,UQCRB,NDUFS2,NDUFA9,NDUFS3,NDUFA2,NDUFB6,NDUFA8,NDUFA7,UQCRH,NDUFA5,NDUFC1,NDUFB2,NDUFB8,NDUFS1,NDUFS4,UQCR,NDUFB9,NDUFB3,NDUFA10,NDUFB7,NDUFS7,NDUFV1,NDUFC2,NDUFA4,NDUFV2,DLD,COX15,NDUFA3,NDUFAF1,NDUFS8,NDUFB10,NDUFA6,ND3,1110020P15RIK,ND1,ND5,COX2,COX1,BDNF,TAZ,ND4L,ND6,COX10,COX8B                                                                                                                                                                                                    |
| 50:000662              | 0.943617 | 0       | 0   | 26              | protein targeting to mitochondrion                          | TIMM8B,TRNT1,TOMM22,TIMM17A,TIMM8A1,AIP,PMPCB,IMMP2L,DNAJC19,TIMM9,TIMM23,MIPEP,HSPD1,TOMM20,TIMM17B,GRPEL1,TSPO,TIMM10,TOMM40,YWHAZ,TIMM8A2,TOMM34,TIMM13,TIMM44,FXC1,MFN2                                                                                                                                                                                                                                                                                                                                                                |
| 50:000659              | 0.927682 | 0       | 0   | 8               | polyamine biosynthetic process                              | ADC,SRM,OAZ1,ODC1,AMD1,AZIN1,AGMAT,GM853                                                                                                                                                                                                                                                                                                                                                                                                                                                                                                   |
| 50:004503              | 0.910462 | 0       | 0   | 7               | protein import into mitochondrial inner membrane            | TIMM8B,TIMM8A1,TIMM9,TIMM10,TIMM8A2,TIMM13,FXC1                                                                                                                                                                                                                                                                                                                                                                                                                                                                                            |
| 50:000611              | 0.89942  | 0       | 0   | 75              | oxidative phosphorylation                                   | NDUFS6,NDUFB4,NDUFB5,ATP5L,NDUFS5,NDUFA1,NDUFAB1,UQCRB,ATP6V1F,NDUFS2,ATP5G2,NDUFA9,NDUFS3,NDUFA2,NDUFB6,ATP5B,NDUFA8,UQCRC1,NDUFA7,UQCRH,NDUFA5,ATP5G3,NDUFC1,NDUFB2,NDUFB8,NDUFS1,NDUFS4,UQCR,NDUFB9,NDUFB3,NDUFA10,NDUFB7,NDUFS7,NDUFV1,NDUFC2,NDUFA4,NDUFV2,ATP6AP1,NDUFS7,UQCRC2,NDUFV1,NDUFC2,NDUFA4,NDUFV2,CYC1,ATP5H,DLD,ATP5F1,ATP5A1,COX15,ATP5J,ATP5G1,NDUFA3,NDUFAF1,NDUFS8,ATP5O,ATP5C1,ATP5K,NDUFB10,NDUFA6,ATP5D,CLCA3,ATP5E,ND3,ATP6V0D2,1110020P15RIK,ND1,ND5,COX2,COX1,BDNF,ATP7A,TAZ,ND4L,MSH2,ND6,COX10,FXN,COX8B,MON2 |
| 50:002290              | 0.880845 | 0       | 0   | 58              | respiratory electron transport chain                        | NDUFS6,NDUFB4,NDUFB5,NDUFS5,NDUFA1,NDUFAB1,UQCRB,NDUFS2,NDUFA9,NDUFS3,NDUFA2,NDUFB6,NDUFA8,NDUFA7,UQCRH,NDUFA5,NDUFC1,NDUFB2,NDUFB8,NDUFS1,NDUFS4,UQCR,NDUFB9,NDUFB3,NDUFA10,NDUFB7,NDUFS7,NDUFV1,NDUFC2,NDUFA4,NDUFV2,DLD,PPARGC1A,ALDH5A1,COX15,SLC37A2,NDUFA3,NDUFAF1,NDUFS8,NDUFB10,NDUFA6,SLC25A13,ND3,MYBBP1A,1110020P15RIK,SLC25A12,ND1,ND5,COX2,COX1,CYTB,BDNF,TAZ,ND4L,ND6,COX10,SLC1A3,COX8B                                                                                                                                     |
| 50:004533              | 0.873657 | 0       | 0   | 52              | cellular respiration                                        | POLR3H,PDHB,SUCLA2,SUCLG1,MDH1,ME3,UQCRB,OXA1L,CYCS,FH1,ADSL,UQCRC1,UQCRH,SLC25A14,ATP5G3,IDH3B,NDUFS1,NDUFS4,UQCRC2,ACO2,SDHA,SUCLG2,MTO1,SDHD,SDHB,PPARGC1A,MDH1B,PRKACA,COX15,SDHC,IDH3A,IDH3G,IDH2,SLC25A13,NFATC3,SURF1,BAX,DLST,NNT,CS,CYP1A2,MDH2,CAT,CISD2,COX1,NFATC4,IDH1,ACO1,COX10,2610507B11RIK,FXN,COX4I2                                                                                                                                                                                                                    |
| 50:002290              | 0.865593 | 0       | 0   | 59              | electron transport chain                                    | NDUFS6,NDUFB4,NDUFB5,NDUFS5,NDUFA1,NDUFAB1,UQCRB,NDUFS2,NDUFA9,NDUFS3,NDUFA2,NDUFB6,NDUFA8,NDUFA7,UQCRH,NDUFA5,NDUFC1,NDUFB2,NDUFB8,NDUFS1,NDUFS4,UQCR,NDUFB9,NDUFB3,NDUFA10,NDUFB7,NDUFS7,NDUFV1,NDUFC2,NDUFA4,NDUFV2,DLD,PPARGC1A,ALDH5A1,COX15,SLC37A2,NDUFA3,NDUFAF1,NDUFS8,NDUFB10,NDUFA6,SLC25A13,ND3,FTSJ3,MYBBP1A,1110020P15RIK,SLC25A12,ND1,ND5,COX2,COX1,CYTB,BDNF,TAZ,ND4L,ND6,COX10,SLC1A3,COX8B                                                                                                                               |
| 50:000637              | 0.859432 | 0       | 0   | 8               | mRNA cleavage                                               | CSTF1,POP4,CPSF3,CSTF3,NUDT21,CPSF1,CSTF2,PCF11                                                                                                                                                                                                                                                                                                                                                                                                                                                                                            |
| 50:005118              | 0.854705 | 0       | 0   | 35              | cofactor catabolic process                                  | POLR3H,PDHB,BLVRA,SUCLA2,SUCLG1,MDH1,FH1,HMOX2,ATP5G3,IDH3B,ACO2,SDHA,SUCLG2,SDHD,SDHB,MDH1B,SDHC,IDH3A,IDH3G,IDH2,NUDT7,HMOX1,ALDH1L1,DLST,NNT,CS,0610012D14RIK,MDH2,ALDH1L2,NCF1,AMBP,IDH1,NCF2,ACO1,2610507B11RIK                                                                                                                                                                                                                                                                                                                       |
| 50:004235              | 0.807868 | 0       | 0   | 10              | L-fucose metabolic process                                  | FUT10,FUT8,FUT9,FPGT,GMDS,FUT4,TSTA3,FUT1,FUT7,FUT2                                                                                                                                                                                                                                                                                                                                                                                                                                                                                        |

Table S3A. Gene sets up-regulated by severe stress plus morphine

| Gene Ontology category | Score    | p-value | FDR | Gene set length | Gene_set_description                                        | Gene_set_genes                                                                                                                                                                                                                                                                                                                                                                                                                                                                                                                                                                                                                                                                                          |
|------------------------|----------|---------|-----|-----------------|-------------------------------------------------------------|---------------------------------------------------------------------------------------------------------------------------------------------------------------------------------------------------------------------------------------------------------------------------------------------------------------------------------------------------------------------------------------------------------------------------------------------------------------------------------------------------------------------------------------------------------------------------------------------------------------------------------------------------------------------------------------------------------|
| GO:0008333             | 0.804998 | 0       | 0   | 8               | endosome to lysosome transport                              | CHMP5,M6PR,SNX1,ADRB2,VAMP7,LYST,RHOB,SORT1                                                                                                                                                                                                                                                                                                                                                                                                                                                                                                                                                                                                                                                             |
| GO:000914              | 0.788918 | 0       | 0   | 17              | pyrimidine nucleoside triphosphate metabolic process        | CMPK2,NME3,NME7,RBM3,RP2H,TBPL1,NME5,DTYMK,NME1,NME4,TXNDC3,DECR2,CTPS,RP1H,NME6,NME2,DUT                                                                                                                                                                                                                                                                                                                                                                                                                                                                                                                                                                                                               |
| GO:000038              | 0.773816 | 0       | 0   | 25              | spliceosomal snRNP biogenesis                               | LSM2,SNRPG,CLNS1A,SNRPD2,PRPF31,SNRPE,SNRPF,SNRPB,DDX20,GEMIN8,SNRPD3,NCBP2,TGS1,PRMT5,WDR77,SMN1,FUS1,P1,SNRPD1,SIP1,RNUXA,SNUPN,GEMIN5,GEMIN4,GEMIN6,GEMIN7                                                                                                                                                                                                                                                                                                                                                                                                                                                                                                                                           |
| GO:0015984             | 0.766205 | 0       | 0   | 20              | ATP synthesis coupled proton transport                      | ATP5L,ATP6V1F,ATP5G2,ATP5B,ATP5G3,ATP6AP1,ATP5H,ATP5F1,ATP5A1,ATP5J,ATP5G1,ATP5O,ATP5C1,ATP5K,ATP5D,CLCA3,ATP5E,ATP6V0D2,ND4L,MON2                                                                                                                                                                                                                                                                                                                                                                                                                                                                                                                                                                      |
| GO:004650              | 0.76051  | 0       | 0   | 10              | S-adenosylmethionine metabolic process                      | GAMT,PNMT,MAT2B,PCMT1,COMT,MAT2A,TPMT,PEMT,GNMT,MAT1A                                                                                                                                                                                                                                                                                                                                                                                                                                                                                                                                                                                                                                                   |
| GO:000907              | 0.754444 | 0       | 0   | 9               | serine family amino acid biosynthetic process               | PSPH,SEPHS2,PSAT1,DHFR,SARDH,AGXT,PHGDH,CTH,CBS                                                                                                                                                                                                                                                                                                                                                                                                                                                                                                                                                                                                                                                         |
| GO:000600              | 0.734529 | 0       | 0   | 14              | fucose metabolic process                                    | FUT10,FUT8,FUT9,FUCA1,FPGT,GMDS,POFUT2,FUT4,B3GALT,LTSTA3,FUT1,FUT7,FUT2,POFUT1                                                                                                                                                                                                                                                                                                                                                                                                                                                                                                                                                                                                                         |
| GO:000920              | 0.73405  | 0       | 0   | 13              | pyrimidine ribonucleoside triphosphate biosynthetic process | NME3,NME7,RBM3,RP2H,NME5,NME1,NME4,TXNDC3,DECR2,CTPS,RP1H,NME6,NME2                                                                                                                                                                                                                                                                                                                                                                                                                                                                                                                                                                                                                                     |
| GO:004225              | 0.723365 | 0       | 0   | 109             | ribosome biogenesis and assembly                            | EXOSC7,PES1,GNL3L,NOLA3,BXDC5,RRS1,NMD3,GTPBP10,FRG1,RRP1B,BXDC2,MPHOSPH10,MRPL10,MINA,TFB1M,EMG1,UTP18,RRP1,EIF4A3,IMP3,DDX52,BC003885,POP4,5730427N09RIK,EXOSC4,UTP6,RCL1,NGDN,TSR2,UTP11L,GNL2,NHP2L1,EXOSC3,TFB2M,NOL5,NPM1,EBNA1BP2,SBDS,LSM6,KRR1,EXOSC9,WDR36,RNASEL,C1D,ISG20L2,UTP3,DKC1,AATF,RPL7A,IMP4,UTP14A,UTP15,DDX56,RRN3,DDX1,NIP7,TBL3,WBP11,EXOSC5,RPS14,EXOSC2,FTSJ1,D530033C11RIK,DDX51,PA2G4,NPM3,DIMT1,EIF2A,NOL14,GTPBP5,GTPBP4,MRTO4,Z410016O06RIK,WDSOF1,EIF6,TSR1,NOLC1,RNASEN,SDAD1,BYSL,EXOSC10,FBL,WDR3,FTSJ3,RRP9,NOB1,EXOSC1,NOL5A,ARBP,FCF1,NAF1,NOLA2,BMS1,CDKN2A,1110032A13RIK,BOP1,AI595406,PDCC11,DIS3,POPS,EXOSC8,TDRD9,SURF6,NOLA1,GEMIN4,IPO9,FTSJ2,IPO4,HEATR1 |
| GO:000914              | 0.712045 | 0       | 0   | 46              | nucleoside triphosphate biosynthetic process                | ATP5L,CMPK2,NME3,ATP6V1F,NME7,ATP5G2,ATP5B,ATP5G3,RBM3,ATP6AP1,RP2H,TBPL1,NME5,ATP6V0B,DTYMK,ATP6V0C,NME1,ATP5H,ATP5F1,ATP5A1,NME4,ATP5J,ATP5G1,ATP5O,ATP5C1,TXNDC3,ATP5K,PNP1,DECR2,ATP6V1B2,SLC25A13,ATP5D,CLCA3,ATP5E,LDHD,ATP5J2,TGFB1,ATP6V1B1,CTPS,ATP6V0D2,RP1H,NME6,ATP6V1A,NME2,ND4L,MON2                                                                                                                                                                                                                                                                                                                                                                                                      |
| GO:000922              | 0.696524 | 0       | 0   | 17              | pyrimidine ribonucleotide biosynthetic process              | NME3,NME7,DHODH,RBM3,RP2H,NME5,NME1,CMPK1,NME4,UMPS,TXNDC3,DECR2,CTPS,RP1H,NME6,NME2,AK5                                                                                                                                                                                                                                                                                                                                                                                                                                                                                                                                                                                                                |
| GO:003422              | 0.696208 | 0       | 0   | 23              | transmembrane ion transport                                 | ATP5L,ATP6V1F,ATP5G2,ATP5B,ATP5G3,ATP6AP1,ATP5H,CP,ATP5F1,ATP5A1,ATP5J,ATP5G1,ATP5O,ATP7B,ATP5C1,ATP5K,ATP5D,CLCA3,ATP5E,ATP6V0D2,ATP7A,ND4L,MON2                                                                                                                                                                                                                                                                                                                                                                                                                                                                                                                                                       |
| GO:004594              | 0.692166 | 0       | 0   | 11              | negative regulation of translational initiation             | PAIP2,EIF2AK3,EIF2B1,EIF2B3,EIF2B4,EIF2B5,EIF4EBP1,PAIP2B,EIF4EBP3,EIF4EBP2,EIF2AK1                                                                                                                                                                                                                                                                                                                                                                                                                                                                                                                                                                                                                     |
| GO:000803              | 0.690428 | 0       | 0   | 63              | tRNA processing                                             | RPP38,RPP14,TRUB1,RPP30,FARS2,DUS4L,TRNT1,ELAC1,RPP25,RPP40,SCAMP4,QTRT1,TSEN2,POP4,PUS3,6720458F09RIK,TRMT12,TYW3,SSB,LSM6,POP7,MTO1,RPP21,PUS7L,TRMU,DKC1,METTL1,LCMT2,1190005F20RIK,TRDMT1,TYW1,KARS,NSUN2,5730449L18RIK,TRMT5,PUS10,DUS2L,THG1L,SARS,TRMT6,ADAT2,TRMT11,D630004A14RIK,AARS,ADAT1,TRPT1,TRUB2,TRIT1,CCDC76,TSEN34,POP1,PUS7,POPS,WDR4,ELAC2,QTRTD1,TRMT1,PUSL1,TSEN54,PUS1,DUS3L,DUS1L,GTPBP3                                                                                                                                                                                                                                                                                        |
| GO:004298              | 0.689143 | 0       | 0   | 14              | amyloid precursor protein metabolic process                 | ACHE,PSEN1,ABCG1,BACE2,CLN3,PAWR,PSENEN,AATF,NCSTN,PSEN2,CLK6,APH1A,DHCR24,NECAB3                                                                                                                                                                                                                                                                                                                                                                                                                                                                                                                                                                                                                       |
| GO:000636              | 0.673855 | 0       | 0   | 49              | RNA elongation from RNA polymerase II promoter              | POLR2J,POLR2I,CCNH,MNAT1,POLR2D,POLR2F,MAP2K1,TAF11,GTF2H3,SUPT4H1,GTF2E2,GTF2A2,GTF2F1,TBP,POLR2B,TAF12,GTF2H2,POLR2G,GTF2H1,TAF9,CDK7,TCEB3,POLR2C,ELP2,TAF13,ADRM1,GTF2F2,CDK9,POLR2E,TAF5,GTF2E1,TCEB2,TAF10,ERCC3,POLR2L,POLR2K,ELL2,GTF2B,GTF2A1,ELL,ELL3,GTF2H4,ERCC2,SUPT5H,POLR2H,TAF6,TAF4B,POLR2A,TAF1                                                                                                                                                                                                                                                                                                                                                                                       |
| GO:000920              | 0.667976 | 0       | 0   | 42              | purine ribonucleoside triphosphate biosynthetic process     | ATP5L,NME3,ATP6V1F,NME7,ATP5G2,ATP5B,ATP5G3,RBM3,ATP6AP1,RP2H,NME5,ATP6V0B,ATP6V0C,NME1,ATP5H,ATP5F1,ATP5A1,NME4,ATP5J,ATP5G1,ATP5O,ATP5C1,TXNDC3,ATP5K,PNP1,DECR2,ATP6V1B2,SLC25A13,ATP5D,CLCA3,ATP5E,LDHD,ATP5J2,TGFB1,ATP6V1B1,ATP6V0D2,RP1H,NME6,ATP6V1A,NME2,ND4L,MON2                                                                                                                                                                                                                                                                                                                                                                                                                             |
| GO:000688              | 0.664031 | 0       | 0   | 43              | ER to Golgi vesicle-mediated transport                      | BET1,ERGIC3,SAR1B,TRAPPC2L,TXNDC1,TRAPPC1,SEC22B,SEC13,TRAPPC3,USE1,SCFD1,LMAN1,TRAPPC4,0610009B22RIK,SEC23B,SAR1A,NRBP1,GOPC,HINT1,LMAN2L,GOSR2,ERGIC2,VAMP7,TRAPPC2,PRES,RAB2A,SEC22C,STX18,SEC22A,RAB1,YKT6,COG3,SEC24D,GOSR1,VCP,SEC24B,SEC23A,ERGIC1,SEC24A,ZW10,SEC24C,SEC31A,HTT                                                                                                                                                                                                                                                                                                                                                                                                                 |
| GO:003164              | 0.657587 | 0       | 0   | 25              | negative regulation of neurological system process          | GRIK2,ACHE,EIF2AK3,GLRA1,GRM4,GRIK1,DRD2,IFNG,HTR2A,SLC6A1,HTR1B,NPY5R,BCHE,CDK5,NPY2R,CALCA,KCNQ4,GNAI2,PMCH,HCRT,GNAI1,ADRA1A,ADORA1,CLK8,GRM2                                                                                                                                                                                                                                                                                                                                                                                                                                                                                                                                                        |
| GO:004542              | 0.654695 | 0       | 0   | 11              | quinone cofactor biosynthetic process                       | COQ7,COQ5,VKORC1,COQ6,PDSS2,POLR2C,COQ9,COQ4,COQ3,PDSS1,COQ2                                                                                                                                                                                                                                                                                                                                                                                                                                                                                                                                                                                                                                            |
| GO:000636              | 0.648934 | 0       | 0   | 75              | rRNA processing                                             | EXOSC7,NOLA3,BXDC5,FRG1,RRP1B,MPHOSPH10,TFB1M,EMG1,UTP18,RRP1,EIF4A3,IMP3,DDX52,POP4,5730427N09RIK,EXOSC4,UTP6,RCL1,NGDN,TSR2,UTP11L,EXOSC3,TFB2M,NOL5,EBNA1BP2,LSM6,KRR1,EXOSC9,WDR36,RNASEL,C1D,UTP3,DKC1,IMP4,UTP14A,UTP15,DDX56,TBL3,WBP11,EXOSC5,RPS14,EXOSC2,FTSJ1,D530033C11RIK,DDX51,PA2G4,NPM3,DIMT1,NOL14,WDSOF1,NOLC1,EXOSC10,FBL,WDR3,FTSJ3,RRP9,NOB1,EXOSC1,NOL5A,FCF1,NAF1,NOLA2,CDKN2A,1110032A13RIK,BOP1,AI595406,PDCC11,DIS3,POPS,EXOSC8,TDRD9,NOLA1,GEMIN4,FTSJ2,HEATR1                                                                                                                                                                                                               |

**Table S3A. Gene sets up-regulated by severe stress plus morphine**

| Gene Ontology category | Score    | p-value | FDR | Gene set length | Gene set description                                                                           | Gene set genes                                                                                                                                                                                                                                                                                                                                                                                                                                                                                                                                                                                                                                                                                                                                                                                                                                                                                                                                                          |
|------------------------|----------|---------|-----|-----------------|------------------------------------------------------------------------------------------------|-------------------------------------------------------------------------------------------------------------------------------------------------------------------------------------------------------------------------------------------------------------------------------------------------------------------------------------------------------------------------------------------------------------------------------------------------------------------------------------------------------------------------------------------------------------------------------------------------------------------------------------------------------------------------------------------------------------------------------------------------------------------------------------------------------------------------------------------------------------------------------------------------------------------------------------------------------------------------|
| GO:0009111             | 0.643225 | 0       | 0   | 20              | ribonucleoside metabolic process                                                               | ADK,RDH14,DGUOK,QTRT1,NT5E,HPRT1,NT5C2,NT5C3,FHIT,CDA,PNP1,UPP2,PYCRL,NT5C1A,APRT,NUDT3,QTRTD1,UPP1,ADA,APOBEC1                                                                                                                                                                                                                                                                                                                                                                                                                                                                                                                                                                                                                                                                                                                                                                                                                                                         |
| GO:0016077             | 0.627433 | 0       | 0   | 78              | rRNA metabolic process                                                                         | EXOSC7,NOLA3,BXDC5,FRG1,RRP1B,MPHOSPH10,MKI67IP,TFB1M,EMG1,UTP18,RRP1,EIF4A3,IMP3,DDX52,POP4,5730427N09RIK,EXOSC4,UTP6,RCL1,NGDN,TSR2,UTP11L,EXOSC3,TFB2M,NOL5,EBNA1BP2,LSM6,KRR1,EXOSC9,WDR36,RNASEL,C1D,UTP3,DKC1,IMP4,UTP14A,UTP15,DDX56,TBL3,WBP11,EXOSC5,RPS14,EXOSC2,FTSJ1,D530033C11RIK,DDX51,PA2G4,NPM3,DIMT1,NOL14,WDSOF1,NOLC1,EXOSC10,FBL,WDR3,FTSJ3,RRP9,NOB1,EXOSC1,NOL5A,FCF1,NAF1,NOLA2,CDKN2A,DEDD2,1110032A13RIK,BOP1,AI595406,PDCD11,DIS3,POP5,EXOSC8,ERN2,TDRD9,NOLA1,GEMIN4,FTSJ2,HEATR1                                                                                                                                                                                                                                                                                                                                                                                                                                                            |
| GO:0006754             | 0.624981 | 0       | 0   | 29              | ATP biosynthetic process                                                                       | ATP5L,ATP6V1F,ATP5G2,ATP5B,ATP5G3,ATP6AP1,ATP6V0B,ATP6V0C,ATP5H,ATP5F1,ATP5A1,ATP5J,ATP5G1,ATP5O,ATP5C1,ATP5K,ATP6V1B2,SLC25A13,ATP5D,CLCA3,ATP5E,LDHD,ATP5J2,TGFB1,ATP6V1B1,ATP6V0D2,ATP6V1A,ND4L,MON2                                                                                                                                                                                                                                                                                                                                                                                                                                                                                                                                                                                                                                                                                                                                                                 |
| GO:0042558             | 0.624618 | 0       | 0   | 11              | pteridine and derivative biosynthetic process                                                  | PCBD1,GPHH,MOC52,PTS,QDPR,MOC53,MOCOS,GCH1,PCBD2,MOC51,SPR                                                                                                                                                                                                                                                                                                                                                                                                                                                                                                                                                                                                                                                                                                                                                                                                                                                                                                              |
| GO:0006597             | 0.621056 | 0       | 0   | 16              | polyamine metabolic process                                                                    | ADC,SRM,SAT1,OAZ1,ODC1,SMOX,DHPS,AMD1,SAT2,PAOX,SMS,OAZ2,AZIN1,OAZ3,AGMAT,GM853                                                                                                                                                                                                                                                                                                                                                                                                                                                                                                                                                                                                                                                                                                                                                                                                                                                                                         |
| GO:0009133             | 0.616068 | 0       | 0   | 9               | nucleoside diphosphate biosynthetic process                                                    | CMPK2,ATP5B,DYMK,ATP5A1,ATP5C1,ATP5D,ATP5E,ENTPD8,AK5                                                                                                                                                                                                                                                                                                                                                                                                                                                                                                                                                                                                                                                                                                                                                                                                                                                                                                                   |
| GO:0009261             | 0.614655 | 0       | 0   | 66              | ribonucleotide biosynthetic process                                                            | ADK,ADSSL1,ATP5L,ADAL,NME3,ATP6V1F,NME7,ATP5G2,ADSL,DHODH,ATP5B,ATP5G3,RBM3,ATP6AP1,RP2H,NME5,ATP6V0B,ATP6V0C,AMPD3,NME1,ATP5H,CMPK1,ATP5F1,ATP5A1,GMPS,PRPS1,NME4,UMPS,ATP5J,ATP5G1,ATP5O,PAICS,ATP5C1,TXNDC3,ATP5K,PRPS2,PNP1,DECR2,ATP6V1B2,SLC25A13,IMPDPH2,ATP5D,CLCA3,ATP5E,LDHD,ATP5J2,PRPS1L1,TGFB1,GART,ATP6V1B1,CTPS,ATP6V0D2,RP1H,ATIC,NME6,ATP6V1A,ADSS,NME2,AMPD1,ND4L,AMPD2,IMPDPH1,ADA,PFAS,AK5,MON2                                                                                                                                                                                                                                                                                                                                                                                                                                                                                                                                                     |
| GO:0048194             | 0.614511 | 0       | 0   | 11              | Golgi vesicle budding                                                                          | COPB1,COPE,COPB2,PRKCI,COPG,ARCN1,COPZ1,ARF1,ARFGAP1,COPA,GBF1                                                                                                                                                                                                                                                                                                                                                                                                                                                                                                                                                                                                                                                                                                                                                                                                                                                                                                          |
| GO:0034471             | 0.612452 | 0       | 0   | 147             | ncRNA processing                                                                               | RPP38,EXOSC7,RPP14,TRUB1,NOLA3,RPP30,FARS2,DUS4L,BXDC5,TRNT1,ELAC1,FRG1,RPP25,RPP40,RRP1B,INTS9,MPHOSPH10,TFB1M,EMG1,UTP18,SCAMP4,RRP1,EIF4A3,IMP3,DDX52,QTRT1,TSEN2,POP4,PUS3,5730427N09RIK,EXOSC4,UTP6,RCL1,6720458F09RIK,NGDN,TRMT12,TSR2,UTP11L,EXOSC3,TYW3,TFB2M,SSB,NOL5,EBNA1BP2,LSM6,POP7,MTO1,RPP21,KRR1,PUS7L,TRMU,EXOSC9,WDR36,RNASEL,C1D,UTP3,DKC1,METTL1,LCMT2,IMP4,UTP14A,UTP15,1190005F20RIK,DDX56,TRDMT1,INTS12,TYW1,TBL3,WBP11,KARS,INTS7,NSUN2,EXOSC5,5730449L18RIK,RPS14,EXOSC2,FTSJ1,D530033C11RIK,DDX51,DGCR8,TRMT5,PUS10,PA2G4,NPM3,DIMT1,NOL14,DUS2L,THG1L,SARS,WDSOF1,INTS8,NOLC1,TRMT6,INTS4,EXOSC10,ADAT2,TRMT11,FBL,WDR3,FTSJ3,RRP9,NOB1,INTS2,CPSF3L,D630004A14RIK,AARS,EXOSC1,INTS3,NOL5A,ADAT1,TRPT1,TRUB2,FCF1,NAF1,TRIT1,NOLA2,INTS6,CCDC76,TSEN34,CDKN2A,POP1,PUS7,1110032A13RIK,BOP1,AI595406,PDCD11,DIS3,POP5,EXOSC8,INTS10,WDR4,ELAC2,QTRTD1,TRMT1,TDRD9,NOLA1,GEMIN4,PUSL1,FTSJ2,TSEN54,PUS1,DUS3L,DUS1L,GTPBP3,INTS5,HEATR1,INTS1 |
| GO:0006911             | 0.612343 | 0       | 0   | 9               | phagocytosis, recognition                                                                      | FCGR3,CD209B,SCARB1,FCGR1,SIRPA,CLEC7A,COLEC12,MFGE8,JMJD6                                                                                                                                                                                                                                                                                                                                                                                                                                                                                                                                                                                                                                                                                                                                                                                                                                                                                                              |
| GO:0051433             | 0.612175 | 0       | 0   | 65              | positive regulation of ubiquitin-protein ligase activity during mitotic cell cycle             | PSMB5,PSMD10,PSMB2,SKP1A,PSMA6,CCNB1,BTRC,PSMA2,CDC23,PSMF1,PSMD12,CDC2A,UBE2C,PSMA5,PSMB4,PSMC2,PSMD9,PSMA3,PSMB6,PSMD13,PSMD5,FBXO5,PSMC6,PSMA4,PSMB7,PSMC4,PSMB1,PSMC5,PSME2,PSMA1,PSME1,PSMD14,PLK1,PSMD8,PSMB3,CDCC26,UBE2E1,ANAPC11,ANAPC7,PSMD6,PSMD11,PSMD4,PSMD7,PSMA7,CUL1,PSMC3,CDCC20,ANAPC2,PSMB9,ANAPC10,CDC16,UBB,PSMC1,PSMD1,ANAPC4,ANAPC5,PSMB8,PSMD3,PSME3,UBE2D1,CDC27,PSMD2,PSMB10,ANAPC1,FZR1                                                                                                                                                                                                                                                                                                                                                                                                                                                                                                                                                      |
| GO:0006354             | 0.611899 | 0       | 0   | 54              | RNA elongation                                                                                 | POLR2J,POLR2I,CCNH,MNAT1,POLR2D,POLR2F,MAP2K1,TAF11,GTTF2H3,SUPT4H1,GTTF2E2,GTTF2A2,GTTF2F1,2210012G02RIK,TBP,POLR2B,TAF12,GTTF2H2,POLR2G,GTTF2H1,ERCC6,TAF9,CDK7,TCEB3,POLR2C,ELP2,TAF13,ADRM1,GTTF2F2,CDK9,POLR2E,TAF5,GTTF2E1,TCEB2,TAF10,ERCC3,POLR2L,POLR2K,ELL2,GTTF2B,GTTF2A1,ELL,ELL3,GTTF2H4,ERCC2,TCEA1,SUPT5H,POLR2H,TAF6,TCFA2,TAF4B,TCEA3,POLR2A,TAF1                                                                                                                                                                                                                                                                                                                                                                                                                                                                                                                                                                                                      |
| GO:0006164             | 0.611345 | 0       | 0   | 65              | purine nucleotide biosynthetic process                                                         | PPAT,ADSSL1,ATP5L,ADAL,MTHFD1,NME3,ATP6V1F,NME7,ATP5G2,ADSL,ATP5B,NT5E,ATP5G3,RBM3,ATP6AP1,HPRT1,RP2H,NME5,ATP6V0B,ATP6V0C,AMPD3,NME1,ATP5H,ATP5F1,ATP5A1,GMPS,PRPS1,NME4,ATP5J,ATP5G1,ATP5O,PAICS,ATP5C1,TXNDC3,ATP5K,PRPS2,PNP1,DECR2,ATP6V1B2,SLC25A13,IMPDPH2,ATP5D,CLCA3,ATP5E,LDHD,ATP5J2,TGFB1,GART,ATP6V1B1,ATP6V0D2,RP1H,ATIC,NME6,ATP6V1A,ADSS,NME2,AMPD1,ND4L,MSH2,AMPD2,IMPDPH1,ADA,PFAS,AK5,MON2                                                                                                                                                                                                                                                                                                                                                                                                                                                                                                                                                           |
| GO:0031144             | 0.609226 | 0       | 0   | 62              | anaphase-promoting complex-dependent proteasomal ubiquitin-dependent protein catabolic process | PSMB5,BUB3,PSMD10,PSMB2,PSMA6,CCNB1,PSMA2,CDC23,PSMF1,PSMD12,CDC2A,UBE2C,PSMA5,PSMB4,PSMC2,PSMD9,PSMA3,PSMB6,PSMD13,PSMD5,PSMC6,PSMA4,PSMB7,PSMC4,PSMB1,PSMC5,PSME2,PSMA1,PSME1,PSMD14,PSMD8,PSMB3,CDCC26,UBE2E1,ANAPC11,ANAPC7,PSMD6,MAD2L1,PSMD11,PSMD4,PSMD7,PSMA7,PSMC3,CDCC20,ANAPC2,PSMB9,ANAPC10,CDC16,UBB,PSMC1,PSMD1,ANAPC4,BUB1B,ANAPC5,PSMB8,PSMD3,PSME3,UBE2D1,CDC27,PSMD2,PSMB10,ANAPC1                                                                                                                                                                                                                                                                                                                                                                                                                                                                                                                                                                    |
| GO:0002671             | 0.605697 | 0       | 0   | 15              | regulation of acute inflammatory response                                                      | CCRS5,FCGR3,FCER1G,CCR1,NPY5R,FCGR1,EDNRB,INS2,PIK3CG,C3,FCER1A,SPN,FCGR2B,PLA2G4A,MIF                                                                                                                                                                                                                                                                                                                                                                                                                                                                                                                                                                                                                                                                                                                                                                                                                                                                                  |
| GO:0006744             | 0.602003 | 0       | 0   | 10              | ubiquinone biosynthetic process                                                                | COQ7,COQ5,COQ6,PDSS2,POLR2C,COQ9,COQ4,COQ3,PDSS1,COQ2                                                                                                                                                                                                                                                                                                                                                                                                                                                                                                                                                                                                                                                                                                                                                                                                                                                                                                                   |

**Table S3A. Gene sets up-regulated by severe stress plus morphine**

| Gene Ontology category | Score    | p-value | FDR | Gene set length | Gene_set_description                                     | Gene_set_genes                                                                                                                                                                                                                                                                                                                                                                                                                                                                                                                                                                                                                                                                                                                                                                                                                                                                                                                                                                                                                                                                                                                                                                                                          |
|------------------------|----------|---------|-----|-----------------|----------------------------------------------------------|-------------------------------------------------------------------------------------------------------------------------------------------------------------------------------------------------------------------------------------------------------------------------------------------------------------------------------------------------------------------------------------------------------------------------------------------------------------------------------------------------------------------------------------------------------------------------------------------------------------------------------------------------------------------------------------------------------------------------------------------------------------------------------------------------------------------------------------------------------------------------------------------------------------------------------------------------------------------------------------------------------------------------------------------------------------------------------------------------------------------------------------------------------------------------------------------------------------------------|
| GO:005135              | 0.601738 | 0       | 0   | 69              | positive regulation of ligase activity                   | PSMB5,PSMD10,XRCC4,PSMB2,SKP1A,PSMA6,CCNB1,BTRC,PSMA2,CDC23,PSMF1,PSMD12,CDC2A,UBE2C,PSMA5,PSMB4,PSMC2,PSMD9,PSMA3,PSMB6,PSMD13,PSMD5,FBXO5,PSMC6,PSMA4,PSMB7,PSMC4,PSMB1,PSMC5,PSME2,PSMA1,PSME1,PSMD14,PLK1,PSMD8,PSMB3,CDC26,UBE2E1,ANAPC11,ANAPC7,PSMD6,PSMD11,GCLM,PSMD4,PSMD7,PSMA7,CUL1,PSMC3,CDC20,ANAPC2,PSMB9,ANAPC10,CDC16,UBB,PSMC1,UBE2N,PSMD1,ANAPC4,ANAPC5,PSMB8,PSMD3,NHEJ1,PSME3,UBE2D1,CDC27,PSMD2,PSMB10,ANAPC1,FZR1                                                                                                                                                                                                                                                                                                                                                                                                                                                                                                                                                                                                                                                                                                                                                                                 |
| GO:005144              | 0.600516 | 0       | 0   | 66              | positive regulation of ubiquitin-protein ligase activity | PSMB5,PSMD10,PSMB2,SKP1A,PSMA6,CCNB1,BTRC,PSMA2,CDC23,PSMF1,PSMD12,CDC2A,UBE2C,PSMA5,PSMB4,PSMC2,PSMD9,PSMA3,PSMB6,PSMD13,PSMD5,FBXO5,PSMC6,PSMA4,PSMB7,PSMC4,PSMB1,PSMC5,PSME2,PSMA1,PSME1,PSMD14,PLK1,PSMD8,PSMB3,CDC26,UBE2E1,ANAPC11,ANAPC7,PSMD6,PSMD11,GCLM,PSMD4,PSMD7,PSMA7,CUL1,PSMC3,CDC20,ANAPC2,PSMB9,ANAPC10,CDC16,UBB,PSMC1,UBE2N,PSMD1,ANAPC4,ANAPC5,PSMB8,PSMD3,PSME3,UBE2D1,CDC27,PSMD2,PSMB10,ANAPC1,FZR1                                                                                                                                                                                                                                                                                                                                                                                                                                                                                                                                                                                                                                                                                                                                                                                             |
| GO:000915              | 0.600454 | 0       | 0   | 21              | ribonucleoside monophosphate biosynthetic process        | ADK,ADSSL1,ADAL,ADSL,DHODH,AMPD3,GMPS,PRPS1,UMPS,PAICS,PRPS2,IMPDPH2,PRPS1L1,GART,ATIC,ADSS,AMPD1,AMPD2,IMPDPH1,ADA,PFAS                                                                                                                                                                                                                                                                                                                                                                                                                                                                                                                                                                                                                                                                                                                                                                                                                                                                                                                                                                                                                                                                                                |
| GO:000913              | 0.592139 | 0       | 0   | 21              | nucleoside diphosphate metabolic process                 | RRM2B,CMPK2,ATP5B,ENTPD3,DTYMK,NME1,NUDT9,ENTPD1,ATP5A1,ENTPD2,CANT1,ATP5C1,NUDT7,NUDT5,ATP5D,ATP5E,ENTPD4,ENTPD8,RRM2,AK5,ENTPD7                                                                                                                                                                                                                                                                                                                                                                                                                                                                                                                                                                                                                                                                                                                                                                                                                                                                                                                                                                                                                                                                                       |
| GO:000911              | 0.591469 | 0       | 0   | 39              | nucleoside metabolic process                             | ADK,PPAT,RDH14,DGUOK,CMPK2,PRPSAP2,QTRT1,NT5E,HPRT1,NT5C2,TBPL1,NME5,DTYMK,NT5C3,PRPS1,NME4,UMPS,ERH,FHIT,CDA,PRPS2,PNP1,NT5M,PRPS1L1,UPP2,PYCRL,FPGS,NT5C1A,APRT,NT5C1B,DUT,NUDT3,QTRTD1,UPP1,DPYD,PRPSAP1,TYMP,ADA,APOBEC1                                                                                                                                                                                                                                                                                                                                                                                                                                                                                                                                                                                                                                                                                                                                                                                                                                                                                                                                                                                            |
| GO:004545              | 0.59002  | 0       | 0   | 57              | cell redox homeostasis                                   | TXNDC13,TXNDC1,GSR,TXNDC4,TXNDC15,TXNL1,TXNDC16,TXNDC12,QSOX2,DNAJC10,TXNDC14,GCLC,GPX1,TXN2,TXN1,TXNDC11,DLD,NXN,GLRX5,2810407C02RIK,APEX1,TXNDC10,TXNDC5,TXNDC3,PRL8A2,PDIA3,P4HB,SEPW1,2700094K13RIK,1700007B13RIK,TXNDC17,PDIA6,PDIA4,GTPBP1,TXNRD2,1810046J19RIK,TXNDC8,TXNRD3,GLRX,PTGES2,TXNDC2,AIFM1,GLRX2,GUCY2G,AIFM3,QSOX1,PDIA2,PDIA5,TXNRD1,ATP10B,NXNL1,MOGAT1,EGLN2,DDIT3,NRP2,SP110,GLRX3                                                                                                                                                                                                                                                                                                                                                                                                                                                                                                                                                                                                                                                                                                                                                                                                               |
| GO:000644              | 0.583136 | 0       | 0   | 48              | regulation of translational initiation                   | PAIP2,EIF2AK3,4930503E24RIK,EIF4H,EIF1,EIF3H,EIF4B,IMPACT,DAZL,EIF2B1,EIF2B3,EIF2B4,EIF3D,EIF3J,MTIF3,PPP1R15B,EIF2S1,EIF3F,MTIF2,HSPB1,EIF5B,DDX1,EIF3K,EIF2B5,EIF5,BOLL,EIF2B2,EIF2AK4,EIF4A2,EIF1B,EIF3I,EIF3C,EIF3G,TRMT6,EIF5A,EIF4EBP1,EIF3E,BZW1,PAIP2B,BZW2,EIF4EBP3,EIF4G2,EIF4EBP2,EIF2AK1,TNF,EIF4G1,EIF2C1,EIF4G3                                                                                                                                                                                                                                                                                                                                                                                                                                                                                                                                                                                                                                                                                                                                                                                                                                                                                           |
| GO:000638              | 0.580027 | 0       | 0   | 27              | transcription from RNA polymerase III promoter           | POLR3H,GTF3C5,GTF3C6,POLR2F,POLR3G,MAF1,IVNS1ABP,POLR3D,SNAPC2,POLR3C,GTF3C3,SNAPC5,SNAPC3,GTF3C4,POLR3K,POLR2L,POLR2K,POLR3F,TROVE2,CRCP,ZFP143,BRCA1,GTF3C1,GTF3A,GTF3C2,SNAPC4,BRF1                                                                                                                                                                                                                                                                                                                                                                                                                                                                                                                                                                                                                                                                                                                                                                                                                                                                                                                                                                                                                                  |
| GO:001625              | 0.578764 | 0       | 0   | 17              | preassembly of GPI anchor in ER membrane                 | PIGH,PIGG,PIGF,PIGA,PIGX,PIGV,PIGQ,PIGL,PIGW,DPM2,PIGB,PIGN,PIGP,PIGO,PIGC,SEMA6D,PIGM                                                                                                                                                                                                                                                                                                                                                                                                                                                                                                                                                                                                                                                                                                                                                                                                                                                                                                                                                                                                                                                                                                                                  |
| GO:000689              | 0.576211 | 0       | 0   | 18              | retrograde vesicle-mediated transport, Golgi to ER       | COG7,PICK1,COPB1,COPE,RER1,COPB2,COPG,ARCN1,COPZ1,COPG2,ARF1,COG3,TAPBP,KIF1C,ARFGAP1,COPA,RAB6B,GBF1                                                                                                                                                                                                                                                                                                                                                                                                                                                                                                                                                                                                                                                                                                                                                                                                                                                                                                                                                                                                                                                                                                                   |
| GO:002261              | 0.575921 | 0       | 0   | 226             | ribonucleoprotein complex biogenesis and assembly        | PAIP2,EXOSC7,PES1,LSM2,GNL3L,NOLA3,SNRPG,BXDC5,RRS1,NMD3,GTPBP10,FRG1,CLNS1A,EIF1AD,RRP1B,BXDC2,EIF4E,EIF2AK3,MPHOSPH10,4930503E24RIK,MRPL10,MINA,TFB1M,SNRPD2,EMG1,PRPF31,EIF4H,EIF1,SNRPE,UTP18,EIF3H,SF3A3,RRP1,EIF4B,EIF4A3,IMP3,DDX52,BC003885,POP4,5730427N09RIK,IMPACT,CRNKL1,EXOSC4,UTP6,DAZL,SNRPF,RCL1,NGDN,SMNDC1,SNRPB,DDX20,EIF2B1,TSR2,UTP11L,EIF2B3,GNL2,SLU7,EIF1A,NHP2L1,EIF2B4,EXOSC3,TFB2M,EIF3D,EIF3J,GEMIN8,NOL5,PRPF6,NPM1,EBNA1BP2,SBDS,SNRPD3,LSM6,KRR1,PAIP1,MTIF3,PPP1R15B,EXOSC9,WDR36,EIF2S1,RNASEL,C1D,ISG20L2,NCBP2,UTP3,DKC1,AATF,TGS1,EIF3F,LGTN,RPS3A,RPL7A,MTIF2,IMP4,UTP14A,HSPB1,UTP15,EIF5B,DDX56,PRMT5,RRN3,EIF4E2,DDX1,EIF3K,EIF2B5,NIP7,DENR,EIF2S2,TBL3,SFRS9,EIF5,WBP11,USP39,EXOSC5,RPS14,EXOSC2,BOLL,FTSJ1,WDR77,EIF2S3X,EIF2B2,D530033C11RIK,DDX51,EIF2AK4,PA2G4,NPM3,EIF4A2,DIMT1,EIF2A,SMN1,NOL14,GTPBP5,EIF1B,GTPBP4,MRTO4,EIF3I,EIF1AY,EIF3C,SFRS1,EIF3G,FUSIP1,2410016O06RIK,WDSOF1,EIF6,TSR1,NOLC1,RNASEN,TRMT6,SF3A1,SNRPD1,SDAD1,BYSL,SIP1,EXOSC10,EIF5A,EIF5A2,FBL,SF3A2,WDR3,FTSJ3,RRP9,PTBP2,NOB1,MBNL1,EIF4EBP1,SRPK2,EIF3E,BZW1,2410018C20RIK,PAIP2B,TXNL4A,EXOSC1,RNUXA,NOL5A,GATC,BZW2,ARBP,GTF2B,CUGBP1,FCF1,NAF1,NOLA2,BMS1,SFRS2IP,EIF4EBP3,CDKN2A,EIF4G |
| GO:001834              | 0.573218 | 0       | 0   | 12              | protein amino acid prenylation                           | FNTA,RABGGTB,ASNSD1,CHM,FNTB,RP2H,WFS1,PGGT1B,SOAT2,RABGGTA,COX10,PTAR1                                                                                                                                                                                                                                                                                                                                                                                                                                                                                                                                                                                                                                                                                                                                                                                                                                                                                                                                                                                                                                                                                                                                                 |
| GO:001028              | 0.57316  | 0       | 0   | 9               | response to lead ion                                     | CDK4,SLC6A1,BCL2L1,STAR,ALAD,CRYAA,HP,NOS3,LCT                                                                                                                                                                                                                                                                                                                                                                                                                                                                                                                                                                                                                                                                                                                                                                                                                                                                                                                                                                                                                                                                                                                                                                          |
| GO:000703              | 0.563853 | 0       | 0   | 23              | peroxisome organization and biogenesis                   | PEX2,PEX7,PEX19,PEX10,ABCD1,PEX26,SCP2,PEX11A,FIS1,PEX11B,LONP2,PEX13,PEX5,AGXT,PEX3,ABCD3,PEX14,PEX6,PEX12,ACOT8,PEX1,PEX16,PEX11C                                                                                                                                                                                                                                                                                                                                                                                                                                                                                                                                                                                                                                                                                                                                                                                                                                                                                                                                                                                                                                                                                     |
| GO:000616              | 0.562005 | 0       | 0   | 94              | purine nucleotide metabolic process                      | PPAT,DGUOK,ADSSL1,ATP5L,GUK1,ADAL,MTHFD1,NME3,ATP6V1F,NME7,NUDT15,ATP5G2,ADSL,FIGN1,AK1,ATP5B,NT5E,ATP5G3,RBM3,PAPSS1,NDUFS1,ATP6AP1,HPRT1,RP2H,NME5,ATP6V0B,CTNS,ATP6V0C,AMPD3,NME1,NUDT9,ATP5H,ENTPD1,ATP5F1,ATP5A1,GMPS,ENTPD2,PRPS1,NME4,ATP5J,ATP5G1,ATP2A1,ATP1A1,ATP5O,PAICS,ATP5C1,TXNDC3,OLA1,ATP5K,PRPS2,PNP1,DECR2,ATP6V1B2,SLC25A13,IMPDPH2,ATP5D,NUDT1,MUTYH,MPG,CLCA3,ATP5E,LDHD,ATP5J2,TGFB1,GMPPR2,GART,NADK,ATP6V1B1,ERCC3,ATP6V0D2,RP1H,ATIC,MYH7,NME6,ATP6V1A,ACLY,ENPP1,ADSS,NME2,AMPD1,ATP7A,ND4L,MSH2,ATP1A2,AMPD2,ABCC6,OGG1,MYH6,IMPDPH1,ADA,MYO9B,PFAS,AK5,MON2                                                                                                                                                                                                                                                                                                                                                                                                                                                                                                                                                                                                                                |

**Table S3A. Gene sets up-regulated by severe stress plus morphine**

| Gene Ontology category | Score    | p-value | FDR | Gene set length | Gene_set_description                                                               | Gene_set_genes                                                                                                                                                                                                                                                                                                                                                                                                                                                                        |
|------------------------|----------|---------|-----|-----------------|------------------------------------------------------------------------------------|---------------------------------------------------------------------------------------------------------------------------------------------------------------------------------------------------------------------------------------------------------------------------------------------------------------------------------------------------------------------------------------------------------------------------------------------------------------------------------------|
| GO:0051434             | 0.555372 | 0       | 0   | 62              | negative regulation of ubiquitin-protein ligase activity during mitotic cell cycle | PSMB5,BUB3,PSMD10,PSMB2,PSMA6,PSMA2,CDC23,PSMF1,PSMD12,UBE2C,PSMA5,PSMB4,PSMC2,PSMD9,PSMA3,PSMB6,PSMD13,PSMD5,FBXO5,PSMC6,PSMA4,PSMB7,PSMC4,PSMB1,PSMC5,PSME2,PSMA1,PSME1,PSMD14,PSMD8,PSMB3,CDC26,UBE2E1,ANAPC11,ANAPC7,PSMD6,MAD2L1,PSMD11,PSMD4,PSMD7,PSMA7,PSMC3,CDC20,ANAPC2,PSMB9,ANAPC10,CDC16,UBB,PSMC1,PSMD1,ANAPC4,BUB1B,ANAPC5,PSMB8,PSMD3,PSME3,UBE2D1,CDC27,PSMD2,PSMB10,ANAPC1,FZR1                                                                                     |
| GO:0009061             | 0.550486 | 0       | 0   | 16              | aspartate family amino acid biosynthetic process                                   | ASNS,ADI1,MTHFD1,MTRR,ASNSD1,GOT1,BHMT2,GOT2,BHMT,0610012D14RIK,THNSL2,PLOD1,MTHFR,ENOPH1,THNSL1,MT R                                                                                                                                                                                                                                                                                                                                                                                 |
| GO:0048221             | 0.547594 | 0       | 0   | 10              | cis-Golgi to rough ER vesicle-mediated transport                                   | COPB1,COPE,COPB2,COPG,ARCN1,COPZ1,ARF1,ARFGAP1,COPA,GBF1                                                                                                                                                                                                                                                                                                                                                                                                                              |
| GO:0009451             | 0.547022 | 0       | 0   | 34              | RNA modification                                                                   | TRUB1,NOLA3,PARN,TFB1M,QTRT1,PUS3,RPUSD2,DNAJB11,METTL3,RPUSD4,TFB2M,SSB,NOL5,ADAR,PUS7L,DKC1,METTL1,N SUN2,APOBEC3,DIMT1,ADARB1,THG1L,TRUB2,NOLA2,APOBEC2,PUS7,QTRTD1,RPUSD1,A1CF,PUSL1,PUS1,RPUSD3,GTPBP3,A POBEC1                                                                                                                                                                                                                                                                  |
| GO:0009141             | 0.544796 | 0       | 0   | 74              | nucleoside triphosphate metabolic process                                          | DGUOK,ATP5L,RRM2B,CMPK2,NME3,ATP6V1F,NME7,NUDT15,ATP5G2,FIGNL1,AK1,ATP5B,ATP5G3,RBM3,NDUFS1,ATP6AP1,RP2H,TBPL1,NME5,ATP6V0B,CTNS,ENTPD3,DTYMK,ATP6V0C,NME1,ATP5H,ENTPD1,ATP5F1,ATP5A1,NME4,ATP5J,ATP5G1,AT P2A1,ATP1A1,ATP5O,ATP5C1,TXNDC3,OLA1,ATP5K,PNP1,DECR2,ATP6V1B2,SLC25A13,ATP5D,NUDT1,CLCA3,ATP5E,LDHD,AT P5J2,TGFB1,NADK,ATP6V1B1,ERCC3,ENPP3,CTPS,ATP6V0D2,RP1H,MYH7,NME6,ATP6V1A,ACLY,ENPP1,NME2,ATP7A,DUT,ND 4L,ATP1A2,ABCC6,MYH6,ADA,MYO9B,AK5,MON2,ENTPD7              |
| GO:0051344             | 0.544343 | 0       | 0   | 76              | regulation of ligase activity                                                      | PSMB5,BUB3,PSMD10,XRCC4,PSMB2,SKP1A,PSMA6,CCNB1,BTRC,PSMA2,CDC23,PSMF1,PSMD12,CDC2A,UBE2C,PSMA5,PSM B4,PSMC2,PSMD9,PSMA3,PSMB6,PSMD13,PSMD5,FBXO5,PSMC6,PSMA4,PSMB7,PSMC4,PSMB1,PSMC5,PSME2,PSMA1,PSME 1,PSMD14,PLK1,PSMD8,PSMB3,CDC26,UBE2E1,ANAPC11,ANAPC7,PSMD6,MAD2L1,PSMD11,GCLM,PSMD4,PSMD7,PSMA7,C UL1,PSMC3,CDC20,ANAPC2,PSMB9,ANAPC10,CDC16,FEM1A,UBB,PSMC1,UBE2N,PSMD1,ANAPC4,BUB1B,ANAPC5,PSMB8,PS MD3,NHEJ1,CDKN2A,PSME3,UBE2D1,CDC27,PSMD2,PSMB10,ANAPC1,FEM1B,FZR1,ZER1 |
| GO:0055081             | 0.542839 | 0       | 0   | 35              | transmembrane transport                                                            | ATP5L,SLC2A4,ATP6V1F,SLC2A1,ATP5G2,ATP5B,ATP5G3,ATP6AP1,SLC2A13,SLC2A3,ATP5H,CP,ATP5F1,ATP5A1,ATP5J,ATP5G1 ,ATP5O,ATP7B,ATP5C1,SLC2A12,ATP5K,ATP5D,SLC2A2,CLCA3,ATP5E,ATP6V0D2,SLC2A9,SLC2A8,SLC2A5,ATP7A,ND4L,SLC2A1 0,SLC2A7,SLC2A6,MON2                                                                                                                                                                                                                                            |
| GO:0009151             | 0.54246  | 0       | 0   | 60              | purine ribonucleotide biosynthetic process                                         | ADSSL1,ATP5L,ADAL,NME3,ATP6V1F,NME7,ATP5G2,ADSL,ATP5B,ATP5G3,RBM3,ATP6AP1,RP2H,NME5,ATP6V0B,ATP6V0C,A MPD3,NME1,ATP5H,ATP5F1,ATP5A1,GMPS,PRPS1,NME4,ATP5J,ATP5G1,ATP5O,PAICS,ATP5C1,TXNDC3,ATP5K,PRPS2,PNP1,D ECR2,ATP6V1B2,SLC25A13,IMPDH2,ATP5D,CLCA3,ATP5E,LDHD,ATP5J2,TGFB1,GART,ATP6V1B1,ATP6V0D2,RP1H,ATIC,NME6, ATP6V1A,ADSS,NME2,AMPD1,ND4L,AMPD2,IMPDH1,ADA,PFAS,AK5,MON2                                                                                                    |
| GO:0002671             | 0.541455 | 0       | 0   | 9               | positive regulation of acute inflammatory response                                 | FCGR3,FCER1G,NPY5R,FCGR1,PIK3CG,C3,FCER1A,PLA2G4A,MIF                                                                                                                                                                                                                                                                                                                                                                                                                                 |
| GO:0009141             | 0.537865 | 0       | 0   | 64              | purine nucleoside triphosphate metabolic process                                   | DGUOK,ATP5L,NME3,ATP6V1F,NME7,NUDT15,ATP5G2,FIGNL1,AK1,ATP5B,ATP5G3,RBM3,NDUFS1,ATP6AP1,RP2H,NME5,AT P6V0B,CTNS,ATP6V0C,NME1,ATP5H,ENTPD1,ATP5F1,ATP5A1,NME4,ATP5J,ATP5G1,ATP2A1,ATP1A1,ATP5O,ATP5C1,TXNDC3, OLA1,ATP5K,PNP1,DECR2,ATP6V1B2,SLC25A13,ATP5D,NUDT1,CLCA3,ATP5E,LDHD,ATP5J2,TGFB1,NADK,ATP6V1B1,ERCC3,AT P6V0D2,RP1H,MYH7,NME6,ATP6V1A,ACLY,NME2,ATP7A,ND4L,ATP1A2,ABCC6,MYH6,ADA,MYO9B,AK5,MON2                                                                         |
| GO:0007261             | 0.536985 | 0       | 0   | 15              | nitric oxide mediated signal transduction                                          | MT1,AGT,GUCY1B3,MT2,GUCY1A3,RASD1,DDAH1,FPR1,APOE,NPY2R,DDAH2,PDX1,MAFA,AGTR2,NEUROD1                                                                                                                                                                                                                                                                                                                                                                                                 |
| GO:0051444             | 0.536951 | 0       | 0   | 63              | negative regulation of ubiquitin-protein ligase activity                           | PSMB5,BUB3,PSMD10,PSMB2,PSMA6,PSMA2,CDC23,PSMF1,PSMD12,UBE2C,PSMA5,PSMB4,PSMC2,PSMD9,PSMA3,PSMB6,PS MD13,PSMD5,FBXO5,PSMC6,PSMA4,PSMB7,PSMC4,PSMB1,PSMC5,PSME2,PSMA1,PSME1,PSMD14,PSMD8,PSMB3,CDC26,UBE 2E1,ANAPC11,ANAPC7,PSMD6,MAD2L1,PSMD11,PSMD4,PSMD7,PSMA7,PSMC3,CDC20,ANAPC2,PSMB9,ANAPC10,CDC16,UB B,PSMC1,PSMD1,ANAPC4,BUB1B,ANAPC5,PSMB8,PSMD3,CDKN2A,PSME3,UBE2D1,CDC27,PSMD2,PSMB10,ANAPC1,FZR1                                                                           |
| GO:0009301             | 0.524083 | 0       | 0   | 15              | rRNA transcription                                                                 | GTF3C5,GTF3C6,MKI67IP,ANG,CD3EAP,GTF3C3,POLR1E,GTF3C4,NPM3,MARS,GTF3C1,GTF3A,GTF3C2,TCOF1,BRF1                                                                                                                                                                                                                                                                                                                                                                                        |
| GO:0042371             | 0.518603 | 0       | 0   | 13              | quinone cofactor metabolic process                                                 | COQ7,COQ5,VKORC1,COQ6,PDSS2,POLR2C,COQ9,ADH4,COQ4,VKORC1L1,COQ3,PDSS1,COQ2                                                                                                                                                                                                                                                                                                                                                                                                            |
| GO:0006661             | 0.517676 | 0       | 0   | 10              | phosphatidylinositol biosynthetic process                                          | IMPA1,CDIPT,CD81,PI4K2A,PIK3C2A,PI4KB,PIP4K2C,PDGFA,PDGFB,PI4KA                                                                                                                                                                                                                                                                                                                                                                                                                       |
| GO:0018341             | 0.517511 | 0       | 0   | 14              | protein prenylation                                                                | FNTA,RABGGTB,ASNSD1,CHM,FNTB,RP2H,WFS1,COMTD1,PGGT1B,AIPL1,SOAT2,RABGGTA,COX10,PTAR1                                                                                                                                                                                                                                                                                                                                                                                                  |
| GO:0006411             | 0.510804 | 0       | 0   | 67              | translational initiation                                                           | PAIP2,EIF1AD,EIF4E,EIF2AK3,4930503E24RIK,EIF4H,EIF1,EIF3H,EIF4B,IMPACT,DAZL,EIF2B1,EIF2B3,EIF1A,EIF2B4,EIF3D,EIF3J,P AIP1,MTIF3,PPP1R15B,EIF2S1,EIF3F,LGTN,RPS3A,MTIF2,HSPB1,EIF5B,EIF4E2,DDX1,EIF3K,EIF2B5,DENR,EIF2S2,EIF5,BOLL,EIF2 S3X,EIF2B2,EIF2AK4,EIF4A2,EIF1B,EIF3I,EIF1AY,EIF3C,EIF3G,TRMT6,EIF5A,EIF5A2,EIF4EBP1,EIF3E,BZW1,2410018C20RIK,PAIP 2B,BZW2,GTF2B,EIF4EBP3,EIF4G2,EIF4EBP2,EIF4E1B,EIF3B,EIF2AK1,EIF4E3,TNF,EIF4G1,EIF2C1,BRF1,DMXL2,EIF4G3                     |

Table S3A. Gene sets up-regulated by severe stress plus morphine

| Gene Ontology category | Score    | p-value | FDR | Gene set length | Gene_set_description                                      | Gene_set_genes                                                                                                                                                                                                                                                                                                                                                                                                                                                                                                                                                                                                                                                                                                                                                                                                                                                                                                                                                                                                                                                                                                                                                                                                    |
|------------------------|----------|---------|-----|-----------------|-----------------------------------------------------------|-------------------------------------------------------------------------------------------------------------------------------------------------------------------------------------------------------------------------------------------------------------------------------------------------------------------------------------------------------------------------------------------------------------------------------------------------------------------------------------------------------------------------------------------------------------------------------------------------------------------------------------------------------------------------------------------------------------------------------------------------------------------------------------------------------------------------------------------------------------------------------------------------------------------------------------------------------------------------------------------------------------------------------------------------------------------------------------------------------------------------------------------------------------------------------------------------------------------|
| 50:000925              | 0.507935 | 0       | 0   | 90              | ribonucleotide metabolic process                          | ADK,ADSSL1,ATP5L,ADAL,NME3,ATP6V1F,NME7,ATP5G2,ADSL,FIGNL1,AK1,DHODH,ATP5B,ATP5G3,RBM3,NDUFS1,ATP6AP1,RP2H,NME5,ATP6V0B,CTNS,ATP6V0C,AMPD3,NME1,NUDT9,ATP5H,ENTPD1,CMPK1,ATP5F1,ATP5A1,GMPS,ENTPD2,PRPS1,NME4,UMPS,ATP5J,ATP5G1,ATP2A1,CANT1,ATP1A1,ATP5O,PAICS,ATP5C1,TXNDC3,OLA1,ATP5K,PRPS2,PNP1,NUDT5,DECR2,ATP6V1B2,SLC25A13,IMPDH2,ATP5D,CLCA3,ATP5E,LDHD,ATP5J2,PRPS1L1,TGFB1,GMPT2,GART,NADK,ATP6V1B1,ENTPD4,ERC3,CTPS,ATP6V0D2,RP1H,ATIC,MYH7,NME6,ATP6V1A,ACLY,ADSS,NME2,AMPD1,ATP7A,ND4L,ATP1A2,AMPD2,ABCC6,MYH6,IMPDH1,ADA,MYO9B,PFAS,AK5,MON2,ENTPD7                                                                                                                                                                                                                                                                                                                                                                                                                                                                                                                                                                                                                                                 |
| 50:000640              | 0.506757 | 0       | 0   | 14              | tRNA modification                                         | TRUB1,QTTR1,PUS3,SSB,PUS7L,DKC1,METTL1,NSUN2,THG1L,TRUB2,PUS7,QTTRD1,PUS1,GTPBP3                                                                                                                                                                                                                                                                                                                                                                                                                                                                                                                                                                                                                                                                                                                                                                                                                                                                                                                                                                                                                                                                                                                                  |
| 50:000152              | 0.504692 | 0       | 0   | 14              | pseudouridine synthesis                                   | TRUB1,NOLA3,PUS3,RPUSD2,RPUSD4,PUS7L,DKC1,TRUB2,NOLA2,PUS7,RPUSD1,PUSL1,PUS1,RPUSD3                                                                                                                                                                                                                                                                                                                                                                                                                                                                                                                                                                                                                                                                                                                                                                                                                                                                                                                                                                                                                                                                                                                               |
| 50:000674              | 0.504445 | 0       | 0   | 30              | glutathione metabolic process                             | GLO1,GSTK1,GSR,MGST1,GSTT2,GCLC,G6PDX,GPX1,GPX4,CTNS,ALDH5A1,HAGH,GCLM,GSTP1,GSTP2,TXNDR3,SOD1,GSTA3,GLRX2,GPX3,GSS,GGT7,GSTT3,GSTA1,IDH1,CTH,GSTT1,GGT1,GGT5,GGT6                                                                                                                                                                                                                                                                                                                                                                                                                                                                                                                                                                                                                                                                                                                                                                                                                                                                                                                                                                                                                                                |
| 50:000920              | 0.504302 | 0       | 0   | 60              | purine ribonucleoside triphosphate metabolic process      | ATP5L,NME3,ATP6V1F,NME7,ATP5G2,FIGNL1,AK1,ATP5B,ATP5G3,RBM3,NDUFS1,ATP6AP1,RP2H,NME5,ATP6V0B,CTNS,ATP6V0C,NME1,ATP5H,ENTPD1,ATP5F1,ATP5A1,NME4,ATP5J,ATP5G1,ATP2A1,ATP1A1,ATP5O,ATP5C1,TXNDC3,OLA1,ATP5K,PNP1,DECR2,ATP6V1B2,SLC25A13,ATP5D,CLCA3,ATP5E,LDHD,ATP5J2,TGFB1,NADK,ATP6V1B1,ERC3,ATP6V0D2,RP1H,MYH7,NME6,ATP6V1A,ACLY,NME2,ATP7A,ND4L,ATP1A2,ABCC6,MYH6,MYO9B,AK5,MON2                                                                                                                                                                                                                                                                                                                                                                                                                                                                                                                                                                                                                                                                                                                                                                                                                                |
| 50:000645              | 0.503672 | 0       | 0   | 188             | protein folding                                           | UXT,ERP29,FUT10,PDRG1,DNAJB9,PIIH,ATF6,PPWD1,H2-DMA,SIL1,TXNDC4,AIP,TTC1,DNAJB1,DNAJC10,PPIL3,DNAJC12,TTC9,TTC9C,CLGN,BAG5,FKBP2,POU5F1,MKKS,DNAJB4,WBSCR18,CCT3,DNAJA3,APOA2,FKBP4,PIN4,AIF1,PPIL1,DNAJA2,CCT6A,LRPAP1,DNAJA1,FKBP3,CLN3,PIGK,PFDN1,RUVBL2,PPIB,DNAJC19,SEP15,NFYC,STUB1,DNAJB11,TCP1,HSPE1,HSP90B1,FKBP1A,FKBP9,PPIL2,LMAN1,DNAJC1,PFDN5,ERO1L,CCT2,DAXX,CCT8,VBP1,DDR1,H2-DMB2,PPIL6,HSPA9,FKBP7,MPDU1,FKBP14,HSPD1,CCT5,CANX,FKBP15,WFS1,LMAN2L,TBCB,PFDN4,B3GALT4,C80913,H2-KE2,PPIL4,TRAP1,HSCB,CDC26,CRYAA,FKBP8,DNAJB12,ATP6V1G2,PPIA,SEC63,WDR46,DNAJC7,BAG4,GRPEL1,DNAJB7,DNAJB13,TCF19,TBCA,DNAJC5B,TOR1B,PDIA6,CLPX,FKBP11,PIIF,AHSA1,FKBP1,CC7,DNAJC18,PTRH1,CALR3,PIIE,DNAJB6,SGTB,TXNDC2,DNAJC17,ST13,TBCD,TBCE,GRPEL2,HSPA4L,GLRX2,PIN1,CCT6B,QSOX1,CD74,ERO1LB,TOR2A,CALR,CRYAB,HSPA8,PPIG,U GCG1L,BBS12,PHF1,SLMAP,PFDN2,AIPL1,PDIA2,PPID,HYOU1,CCT4,BAG2,HSP90AA1,TAPBP,ETF2H4,TBCB,DNAJC2,PDCL,TTC9B,LST1,DNAJC16,PDIA5,DNAJA4,BBS10,HSPH1,FKBP5,ALG12,DNAJB14,VEGFB,COPA,LTB,KRTAP5-1,SDCCAG10,DNAJC5,FKBP1B,RANBP2,A830007P12RIK,DNAJC4,FKBP10,SH3GLB1,APCS,DNAJC14,PPIC,TOR1A,FKBP6,SACS,TOR3A,BAG3,HSP90A1,DNAJC5G,NKTR,COL11A2,DNAJB5,UBE4B,ZBTB9,LTBP4,KRTAP5-2,SYNGAP1 |
| 50:000683              | 0.496107 | 0       | 0   | 62              | mitochondrial transport                                   | TIMM8B,TRNT1,TOMM22,KIF5B,TIMM17A,TIMM8A1,AIP,MTX2,PSEN1,PMPCB,IMMP2L,SLC25A14,DNAJC19,TIMM9,VDAC1,TIMM23,SLC25A20,STARD3,CPT2,BCL2L1,SLC25A17,MIPEP,PLEKHF1,HSPD1,TOMM20,BHLHB8,SLC37A2,TIMM17B,SLC25A4,SLC25A15,GRPEL1,TSPO,TIMM10,SLC25A13,TOMM40,SLC25A32,SLC25A1,YWHAZ,TIMM8A2,SLC25A12,UCP2,UCP3,TOMM34,SLC25A30,TIMM13,HSP90AA1,SLC25A27,SLC25A10,SLC25A24,TIMM44,SLC25A37,FXC1,UCP1,CPT1B,BAK1,MFN2,SLC1A3,BNIP3,BCL2,SLC25A36,HTT,SLC25A2                                                                                                                                                                                                                                                                                                                                                                                                                                                                                                                                                                                                                                                                                                                                                                |
| 50:004650              | 0.489999 | 0       | 0   | 14              | glycerol ether biosynthetic process                       | PPAP2A,PEX7,GNPAT,DGAT2,ANG,MOGAT2,PLCE1,PCK1,DGAT1,AGPAT6,CDS1,MOGAT1,PNPLA3,LPL                                                                                                                                                                                                                                                                                                                                                                                                                                                                                                                                                                                                                                                                                                                                                                                                                                                                                                                                                                                                                                                                                                                                 |
| 50:000636              | 0.486065 | 0       | 0   | 64              | transcription initiation from RNA polymerase II promoter  | MED27,POLR2J,POLR2I,CCNH,MNAT1,POLR2D,POLR2F,TAF11,ETF2H3,ETF2E2,ETF2A2,ETF2F1,TBP,POLR2B,MED16,TAF12,ETF2H2,TBPL1,POLR2G,MED4,E2F2,ETF2H1,TAF9,MED17,PPARGC1A,CDK7,POLR2C,TAF13,ETF2F2,CDK9,E2F3,POLR2E,TAF5,ETF2E1,MED7,MED26,TBPL2,MED24,TAF10,ETF2A1L,ERC3,POLR2L,POLR2K,MED30,ETF2I,ETF2B,ETF2A1,ETF2H4,ERC2,MED1,MED23,MAZ,TAF2,POLR2H,TAF6,TAF4B,MED14,MED13,CLIP2,POLR2A,TAF1,THRAP3,NCOA6,MED12                                                                                                                                                                                                                                                                                                                                                                                                                                                                                                                                                                                                                                                                                                                                                                                                          |
| 50:004316              | 0.479568 | 0       | 0   | 90              | proteasomal ubiquitin-dependent protein catabolic process | PSMB5,BUB3,PSMD10,PSMB2,PSMA6,GCLC,CCNH,MNAT1,PSMA2,CDC23,PSMF1,PSMD12,CDC2A,UBE2C,PSMA5,DERL2,STUB1,PSMB4,UBE2D2,PSMC2,PSMD9,PSMA3,RAD23B,PSMB6,PSMD13,PSMD5,UCHL5IP,UBE2D3,PSMC6,PSMA4,PSMB7,PSMC4,PSMB1,PSMC5,MAN1B1,FAF1,PSME2,SYVN1,PSMA1,PSME1,PSMD14,DERL1,PSMD8,PSMB3,PPP2CB,CDC26,FBXO2,UBE2E1,ANAPC11,ANAPC7,PSMD6,MAD2L1,PSMD11,PSMD4,PSMD7,AMFR,PSMA7,PSMC3,CDC20,ANAPC2,TRIM63,PSMB9,ANAPC10,CDC16,PCNP,DERL3,UBB,PSMC1,RAD23A,PSMD1,ANAPC4,BUB1B,FBXO6,ANAPC5,PSMB8,EDEM3,PSMD3,VCP,PSME3,UBE2D1,SHH,EDEM1,CDC27,PPP2R5C,NPLOC4,UBE2G2,PSMD2,PSMB10,ANAPC1,AKT1,CD2AP                                                                                                                                                                                                                                                                                                                                                                                                                                                                                                                                                                                                                               |
| 50:000635              | 0.470241 | 0       | 0   | 79              | transcription initiation                                  | MED27,POLR2J,POLR2I,SMARCA5,CCNH,MNAT1,POLR2D,TAF9B,POLR2F,TAF11,ETF2H3,ETF2E2,ETF2A2,NAT14,ETF2F1,SUPT3H,TBP,POLR2B,MED16,TAF12,ETF2H2,TBPL1,POLR2G,MED4,E2F2,ETF2H1,TAF9,MED17,PPARGC1A,CDK7,RRN3,POLR2C,SNAPC5,BRF2,TAF13,ETF3C4,ETF2F2,CDK9,E2F3,POLR2E,PTRF,TAF5,ETF2E1,MED7,MED26,TBPL2,MED24,TAF10,ETF2A1L,ERC3,POLR2L,POLR2K,MED30,ETF2I,ETF2B,ETF2A1,ETF2H4,ERC2,MED1,RF1,MED23,MAZ,MYC,LIPE,TAF2,TAF6L,POLR2H,TAF6,TAF4B,MED14,MED13,CLIP2,POLR2A,TAF1,BRF1,THRAP3,NCOA6,MED12                                                                                                                                                                                                                                                                                                                                                                                                                                                                                                                                                                                                                                                                                                                          |



**Table S3A. Gene sets up-regulated by severe stress plus morphine**

| Gene Ontology category | Score    | p-value | FDR | Gene set length | Gene_set_description                                                              | Gene_set_genes                                                                                                                                                                                                                                                                                                                                                                                                                                                                                                                                                                                                                                                                                                                                                                                                                                                                                                                                                                                                                                                                                                                                                                                                                                                           |
|------------------------|----------|---------|-----|-----------------|-----------------------------------------------------------------------------------|--------------------------------------------------------------------------------------------------------------------------------------------------------------------------------------------------------------------------------------------------------------------------------------------------------------------------------------------------------------------------------------------------------------------------------------------------------------------------------------------------------------------------------------------------------------------------------------------------------------------------------------------------------------------------------------------------------------------------------------------------------------------------------------------------------------------------------------------------------------------------------------------------------------------------------------------------------------------------------------------------------------------------------------------------------------------------------------------------------------------------------------------------------------------------------------------------------------------------------------------------------------------------|
| GO:0009151             | 0.470219 | 0       | 0   | 80              | purine ribonucleotide metabolic process                                           | ADSSL1,ATP5L,ADAL,NME3,ATP6V1F,NME7,ATP5G2,ADSL,FIGNL1,AK1,ATP5B,ATP5G3,RBM3,NDUFS1,ATP6AP1,RP2H,NME5,ATP6V0B,CTNS,ATP6V0C,AMPD3,NME1,NUDT9,ATP5H,ENTPD1,ATP5F1,ATP5A1,GMPS,ENTPD2,PRPS1,NME4,ATP5J,ATP5G1,ATP2A1,ATP1A1,ATP5O,PAICS,ATP5C1,TXNDC3,OLA1,ATP5K,PRPS2,PNP1,DECR2,ATP6V1B2,SLC25A13,IMPDH2,ATP5D,CLCA3,ATP5E,LDHD,ATP5J2,TGFB1,GMPPR2,GART,NADK,ATP6V1B1,ERCC3,ATP6V0D2,RP1H,ATIC,MYH7,NME6,ATP6V1A,ACLY,ADSS,NME2,AMPD1,ATP7A,ND4L,ATP1A2,AMPD2,ABCC6,MYH6,IMPDH1,ADA,MYO9B,PFAS,AK5,MON2                                                                                                                                                                                                                                                                                                                                                                                                                                                                                                                                                                                                                                                                                                                                                                  |
| GO:0019888             | 0.468785 | 0       | 0   | 15              | antigen processing and presentation of exogenous peptide antigen via MHC class II | UNC93B1,H2-DMA,FCER1G,H2-DMB2,H2-EA,IFI30,H2-EB2,H2-EB1,CTSE,CD74,FCGR2B,H2-OA,H2-AB1,TRAF6,H2-AA                                                                                                                                                                                                                                                                                                                                                                                                                                                                                                                                                                                                                                                                                                                                                                                                                                                                                                                                                                                                                                                                                                                                                                        |
| GO:0043574             | 0.467514 | 0       | 0   | 14              | peroxisomal transport                                                             | PEX7,PEX19,PEX10,ABCD1,PEX26,PEX13,PEX5,AGXT,PEX3,PEX14,PEX6,PEX12,PEX1,PEX16                                                                                                                                                                                                                                                                                                                                                                                                                                                                                                                                                                                                                                                                                                                                                                                                                                                                                                                                                                                                                                                                                                                                                                                            |
| GO:0017144             | 0.465877 | 0       | 0   | 30              | negative regulation of translation                                                | PAIP2,SRP9,EIF2AK3,ANG3,EIF4A3,SRP14,ANG,EIF2B1,EIF2B3,EIF2B4,HBEFG,IGF2BP2,EIF2B5,PTGFRN,EIF2AK4,TIA1,MVK,PRG3,EIF4EBP1,PRKAA1,PAIP2B,NDUFA13,IGF2BP1,EIF4EBP3,TSC1,EIF4EBP2,EIF2AK1,IGF2BP3,PRKCA,YBX2                                                                                                                                                                                                                                                                                                                                                                                                                                                                                                                                                                                                                                                                                                                                                                                                                                                                                                                                                                                                                                                                 |
| GO:0007001             | 0.459165 | 0       | 0   | 10              | inner mitochondrial membrane organization and biogenesis                          | TIMM8B,TIMM8A1,TIMM9,TIMM10,BAX,TIMM8A2,TIMM13,TAZ,OPA1,FXC1                                                                                                                                                                                                                                                                                                                                                                                                                                                                                                                                                                                                                                                                                                                                                                                                                                                                                                                                                                                                                                                                                                                                                                                                             |
| GO:0052571             | 0.455806 | 0       | 0   | 9               | response to host immune response                                                  | TLR7,GUCY1A3,TLR3,TLR4,TLR9,TLR1,TLR2,NOD2,TLR6                                                                                                                                                                                                                                                                                                                                                                                                                                                                                                                                                                                                                                                                                                                                                                                                                                                                                                                                                                                                                                                                                                                                                                                                                          |
| GO:0052201             | 0.448942 | 0       | 0   | 11              | response to host defenses                                                         | TLR7,GUCY1A3,TLR3,TLR4,SMAD3,TLR9,TLR1,TGFB1,TLR2,NOD2,TLR6                                                                                                                                                                                                                                                                                                                                                                                                                                                                                                                                                                                                                                                                                                                                                                                                                                                                                                                                                                                                                                                                                                                                                                                                              |
| GO:0006414             | 0.448717 | 0       | 0   | 98              | translational elongation                                                          | RPL10,SRP9,RPS20,RPS18,RPL15,RPS21,RPS13,RPS16,RPS8,RPS7,RPL39,RPS3,SRP14,TUFM,SECISBP2,RPL5,RPL3,RPS25,GSPT2,RPS11,RPL8,RPL36,RPS6,RPL11,RPL23,SEPSECS,RPL7,RPS15A,RPS15,RPS23,RPL12,RPL35A,RPL38,RPS24,RPL31,RPL30,RPS3A,RPL7A,RPL6,GFM1,RPL37,EEFSEC,RPL13A,RPS5,RPS14,RPL9,RPL28,RPL35,RPL17,RPL14,TRSPAP1,RPL10A,RPL21,RPSA,RPL24,RPL18A,EEF1A2,EEF1D,RPL34,RPL36A,RPL4,FAU,RPL19,RPS2,RPL18,RPS10,RPL26,RPS17,EEF1B2,RPS29,RPS27,RPL27A,RPL13,RP59,RPS12,RPL23A,RPL27,RPS26,RPL29,UBA52,ARBP,RPLP1,RPL41,VAR5,RPS4X,EEF1A1,EEF2,RPS19,RPLP2,RPS28,CACNB4,POSTK,DIO2,RPL22,EEF1G,TSFM,EEF2K,RPL3L                                                                                                                                                                                                                                                                                                                                                                                                                                                                                                                                                                                                                                                                   |
| GO:0019434             | 0.44508  | 0       | 0   | 20              | aromatic compound catabolic process                                               | EPHX2,GSTZ1,PTS,QDPR,HPD,ABAT,EPHX1,KYNU,INDO,ALDH5A1,INDO1,TD02,AADAT,GCH1,KMO,HGD,PAH,TAT,FAH,AFMID                                                                                                                                                                                                                                                                                                                                                                                                                                                                                                                                                                                                                                                                                                                                                                                                                                                                                                                                                                                                                                                                                                                                                                    |
| GO:0008591             | 0.44469  | 0       | 0   | 9               | regulation of Notch signaling pathway                                             | DLL3,HEY2,JAG1,NFKBIA,IL6ST,DTX1,TRP63,RFNG,KIT                                                                                                                                                                                                                                                                                                                                                                                                                                                                                                                                                                                                                                                                                                                                                                                                                                                                                                                                                                                                                                                                                                                                                                                                                          |
| GO:0006391             | 0.442352 | 0       | 0   | 135             | tRNA metabolic process                                                            | RPP38,RPP14,TRUB1,RPP30,FARS2,DUS4L,TRNT1,ELAC1,RPP25,TARSL2,NARS2,RPP40,LARS2,AAASD1,SCYE1,POU5F1,TARS,DAARS,SCAMP4,AIF1,YARS2,QTRT1,TSEN2,POP4,PUS3,RARS2,6720458F09RIK,TRMT12,PTPLB,TYW3,SSB,DAXX,SLC22A17,DDR1,LSM6,POP7,MTO1,RPP21,PUS7L,TRMU,PARS2,DLAT,LARS,QARS,PLXNB2,DARS2,DKC1,METTL1,LCMT2,POLG2,1190005F20RIK,TRDMT1,RARS,ZMAT2,TYW1,B3GALT4,KARS,NSUN2,5730449L18RIK,WDR92,NARS,ATP6V1G2,EIF2AK4,HARS,TRMT5,WDR46,PUS10,SARS2,FARSB,TCF19,DUS2L,GARS,THG1L,SARS,YARS,TRMT6,WARS,HARS2,ADAT2,TRMT11,TARS2,MARS,D630004A14RIK,AAARS,EARS2,ARID2,ADAT1,TRPT1,TRUB2,IARS2,PHF1,TRIT1,CCDC76,WARS2,DALRD3,VAR5,TAPBP,GTFF2H4,MARS2,TSEN34,4833403I15RIK,EPRS,LST1,KHSRP,POP1,CARS2,PUS7,POP5,WDR4,DUT,LTB,AAARS2,VAR5,IARS,ELAC2,QTRTD1,TRMT1,HMG20B,PUSL1,TSEN54,PUS1,DND1,CARS,DUS3L,ASTN1,DUS1L,GTPBP3,FARSA,CREG2,ZNF1,COL11A2,TPR,ZBTB9,TUBGCP6,SYNGAP1                                                                                                                                                                                                                                                                                                                                                                                                    |
| GO:0046481             | 0.437128 | 0       | 0   | 41              | phosphoinositide biosynthetic process                                             | PIGU,PIGH,IMPA1,PIGG,FRAG1,DPM1,PIGF,PIGA,CDIPT,CD81,PIGK,PI4K2A,PIK3C2A,PIGX,PIGV,PIGQ,PIGL,PIGW,DPM2,PIGB,PI4KB,PIGN,PLAUR,PIGP,PIP4K2C,PGAP1,DPM3,PIGS,GPA1,PIGY,PIGT,C130090K23RIK,PIGO,PDGFA,PIGC,SEMA6D,PIGM,PDGFB,PIGZ,PI4KA,PERLD1                                                                                                                                                                                                                                                                                                                                                                                                                                                                                                                                                                                                                                                                                                                                                                                                                                                                                                                                                                                                                               |
| GO:0006091             | 0.436826 | 0       | 0   | 274             | generation of precursor metabolites and energy                                    | POLR3H,PDHB,NDUFS6,NDUFB4,PGAM2,NDUFB5,ATP5L,SUCLA2,NDUFS5,SUCLG1,NDUFA1,MDH1,LDHB,ME3,COX6A2,ENO3,COX17,CYB561,NDUFAB1,UQCRB,PYGL,OGDHL,PPP3R2,ATP6V1F,OXA1L,COX7C,CYCS,MC4R,NDUFS2,MCHR1,SCO1,ATP5G2,FH1,NDUFA9,PGAM1,BPGM,LAMP2,ADSL,ENO2,NDUFS3,GAA,NDUFA2,NDUFB6,ATP5B,PKFB1,BCS1L,NDUFA8,UQCRC1,NDUFA7,UQCRH,NDUFA5,SLC25A14,ATP5G3,NDUFC1,NDUFB2,NDUFB8,IDH3B,NDUFS1,ISL1,NDUFS4,GBE1,UQCR,NDUFB9,NDUFB3,GOT1,NDUFA10,NDUFB7,ATP6AP1,PHKA1,ATPIF1,NDUFS7,UQCRC2,ACO2,NDUFV1,PPP1CA,NRF1,NDUFC2,SDHA,NDUFA4,SUCLG2,MTO1,NDUFV2,COX6C,CYC1,ATP5H,SDHD,SLC25A3,FDX1,SDHB,PPP1CC,DLI,DLAT,PPARGC1A,ECD,PPP1R3D,UEVLD,ALDH5A1,PPP1R2,MDH1B,ALDOC,ATP5F1,ATP5A1,COX4I1,PRKACA,COX15,SLC37A2,LRR16A,ATP5J,ATP5G1,PHKG1,GFPT2,NDUFA3,SDHC,NDUFAF1,PHKB,COX6A1,ALDOB,PGK2,IDH3A,IDH3G,NDUFS8,ATP5O,IDH2,ATP5C1,GNPDA1,SLC25A4,ATP5K,HIF1A,INS2,NDUFB10,GCK,NDUFA6,AASS,PHKG2,SLC25A13,GFPT1,ATP5D,NFATC3,CYB5R4,SURF1,PFKM,ACOX1,CEBPA,ACADVL,CLCA3,ATP5E,LEP,IL6ST,OGDH,ADIPOQ,PKLR,FECH,COX7A1,KL,APOM,BAX,PPP1CB,PGK1,ND3,FTSJ3,ATP6V0D2,ARNT,DLST,PDHA1,EG277333,NNT,CS,MYBBP1A,A,TPI1,1110020P15RIK,CROT,VGF,COX8A,SLC25A12,PKC1,PRKAG3,PPP1R3A,HK2,LDHAL6B,ADRA1B,SLC37A4,6430537H07RIK,ND1,S100B,PPP1R3B,PKM2,LDHC,GNAS,ADPGK,FDXR,CYP1A2,EPM2A,GCGR,PPP1R3C,ALDOA, |

Table S3A. Gene sets up-regulated by severe stress plus morphine

| Gene Ontology category | Score    | p-value | FDR | Gene set length | Gene_set_description                         | Gene_set_genes                                                                                                                                                                                                                                                                                                                                                                                                                                                                                                                                                                                                                                                                                                                                                                                                                                                                                                                                                                                                                                                                                                                                                                                                                                                                                                                                                            |
|------------------------|----------|---------|-----|-----------------|----------------------------------------------|---------------------------------------------------------------------------------------------------------------------------------------------------------------------------------------------------------------------------------------------------------------------------------------------------------------------------------------------------------------------------------------------------------------------------------------------------------------------------------------------------------------------------------------------------------------------------------------------------------------------------------------------------------------------------------------------------------------------------------------------------------------------------------------------------------------------------------------------------------------------------------------------------------------------------------------------------------------------------------------------------------------------------------------------------------------------------------------------------------------------------------------------------------------------------------------------------------------------------------------------------------------------------------------------------------------------------------------------------------------------------|
| GO:004819              | 0.436553 | 0       | 0   | 108             | Golgi vesicle transport                      | BET1,SCAMP1,SLC30A6,ERGIC3,COG7,SAR1B,PICK1,TRAPPC2L,D230025D16RIK,TXNDC1,TRAPPC1,SEC22B,GOLGA5,SEC13,COPB1,TRAPPC3,CHIC2,USE1,GABARAPL2,COPE,RER1,COPB2,SCAMP2,PRKCI,SCFD1,LMAN1,TRAPPC4,NAPG,0610009B22RIK,SEC23B,SAR1A,COPG,ARCN1,NRBP1,GOPC,RAB14,TGOLN1,STEAP2,HINT1,BLZF1,LMAN2L,GOSR2,ERGIC2,CUX1,TMED10,COP21,COPG2,VAMP7,VPS29,ARF1,TRAPPC2,PREB,RAB2A,GOLGA7,EXOC5,STX7,SEC22C,STX6,NAPA,STX18,RABEP1,SEC22A,STX16,RAB11,YKT6,OPTN,WIPI1,KRT18,COG1,COG5,COG3,TOM1L2,SEC24D,GGA1,USO1,GOSR1,TAPBP,RAB9B,KIF1C,SPIRE1,ARFGAP1,VCP,SEC24B,ARL1,SCAMP3,PACS1,DOPEY1,COPA,SEC23A,AP2A1,ERGIC1,VPS13A,SNAP23,SEC24A,COG2,ZW10,AP3B2,SEC24C,SEC31A,SORT1,OSBPL5,DOPEY2,RAB6B,GOLGA3,MON2,GBF1,HTT,NBEA                                                                                                                                                                                                                                                                                                                                                                                                                                                                                                                                                                                                                                                                |
| GO:004236              | 0.433122 | 0       | 0   | 21              | water-soluble vitamin biosynthetic process   | GSTO1,PSAT1,G6PDX,PNPO,PDXK,NMNAT2,KYNU,NMNAT1,NAPRT1,ITGB1BP3,QPRT,MMAB,BC016495,RFK,0610012D14RIK,AKR1A4,NADSYN1,NMNAT3,NAMPT,GULO,ME1                                                                                                                                                                                                                                                                                                                                                                                                                                                                                                                                                                                                                                                                                                                                                                                                                                                                                                                                                                                                                                                                                                                                                                                                                                  |
| GO:004603              | 0.432501 | 0       | 0   | 47              | ATP metabolic process                        | ATP5L,ATP6V1F,ATP5G2,FIGNL1,AK1,ATP5B,ATP5G3,NDUFS1,ATP6AP1,ATP6V0B,CTNS,ATP6V0C,ATP5H,ENTPD1,ATP5F1,ATP5A1,ATP5J,ATP5G1,ATP2A1,ATP1A1,ATP5O,ATP5C1,OLA1,ATP5K,ATP6V1B2,SLC25A13,ATP5D,CLCA3,ATP5E,LDHD,ATP5J2,TGFB1,NADK,ATP6V1B1,ERCC3,ATP6V0D2,MYH7,ATP6V1A,ACLY,ATP7A,ND4L,ATP1A2,ABCC6,MYH6,MYO9B,AKS,MON2                                                                                                                                                                                                                                                                                                                                                                                                                                                                                                                                                                                                                                                                                                                                                                                                                                                                                                                                                                                                                                                           |
| GO:004427              | 0.418751 | 0       | 0   | 85              | nitrogen compound catabolic process          | HIBCH,GAD1,ACHE,AUH,6530401N04RIK,HDC,GSTZ1,MPST,MTHFD1,SAT1,GAD2,MOXD1,BCKDHB,DDO,DTD1,CDO1,ARG2,PTS,ASL,MCCC2,QDPR,GOT1,HPD,AHCY,PRODH2,PCCA,BCKDHA,ASRGL1,GOT2,KYNU,INDO,SMOX,GCSH,DHPS,ACAD8,PCCB,MAOA,ALDH6A1,COMT,BCAT1,DDAH1,INDOL1,SARDH,AASS,ASPA,DBH,TDO2,AADAT,PRODH,PAOX,4930402E16RIK,BCKDK,DDAH2,FRRS1,GCH1,DIO3,DMGDH,TST,COLQ,KMO,ARG1,UROC1,A230051G13RIK,GLUD1,CSAD,SLC6A3,DIO2,MCCC1,SHMT1,BCAT2,GLS,HGD,MOXD2,ALDH4A1,PADI3,HAL,AMDHD1,LAO1,GLDC,PAH,AMT,FTCD,TAT,FAH,AFMID                                                                                                                                                                                                                                                                                                                                                                                                                                                                                                                                                                                                                                                                                                                                                                                                                                                                           |
| GO:004362              | 0.418209 | 0       | 0   | 21              | cellular protein complex disassembly         | MTERFD3,ETF1,MTERF,HRSP12,XRN2,SUPT16H,SMARCE1,MTRF1L,ICT1,PTFR,SET,CEBPB,TNP1,TF2,NRG1,TF1,MTRF1,MAZ,2810006K23RIK,UPF1,HMGA1                                                                                                                                                                                                                                                                                                                                                                                                                                                                                                                                                                                                                                                                                                                                                                                                                                                                                                                                                                                                                                                                                                                                                                                                                                            |
| GO:001599              | 0.41762  | 0       | 0   | 12              | ATP hydrolysis coupled proton transport      | ATP6V1H,ATP6V0E2,ATP6V1E1,ATP6V0E,ATP6V0B,ATP1A1,ATP1A4,ATP6V0A4,ATP1A2,ATP6V1E2,ATP6V1G3,ATP1A3                                                                                                                                                                                                                                                                                                                                                                                                                                                                                                                                                                                                                                                                                                                                                                                                                                                                                                                                                                                                                                                                                                                                                                                                                                                                          |
| GO:000911              | 0.41507  | 0       | 0   | 24              | vitamin biosynthetic process                 | GSTO1,PSAT1,G6PDX,PNPO,PDXK,NMNAT2,VKORC1,KYNU,NMNAT1,NAPRT1,ITGB1BP3,QPRT,MMAB,DHRS9,BC016495,RFK,0610012D14RIK,AKR1A4,CYP27B1,NADSYN1,NMNAT3,NAMPT,GULO,ME1                                                                                                                                                                                                                                                                                                                                                                                                                                                                                                                                                                                                                                                                                                                                                                                                                                                                                                                                                                                                                                                                                                                                                                                                             |
| GO:000649              | 0.413182 | 0       | 0   | 60              | protein amino acid lipidation                | PIGU,PIGH,PIGG,FRAG1,DPM1,ZDHHC17,FNTA,PIGF,RABGGTB,PIGA,ASNSD1,PIGK,MTPP,CHM,FNTB,RP2H,HHATL,ZDHHC15,PIGX,PIGV,NMT1,WFS1,COMTD1,PIGQ,PIGL,PIGW,DPM2,ZDHHC2,MAP6D1,ZDHHC1,ZDHHC3,PIGB,PIGN,ATG10,PLAUR,PIGP,ABCA1,PGGT1B,PGAP1,AIPL1,DPM3,PIGS,SOAT2,HHAT,GPA1,PIGY,PIGT,ATG7,C130090K23RIK,PIGO,RABGGTA,PIGC,SEMA6D,PIGM,NMT2,COX10,PIGZ,ZDHHC7,PTAR1,PERLD1                                                                                                                                                                                                                                                                                                                                                                                                                                                                                                                                                                                                                                                                                                                                                                                                                                                                                                                                                                                                             |
| GO:006500              | 0.412596 | 0       | 0   | 179             | protein-DNA complex assembly                 | H3F3B,MED27,POLR2J,POLR2I,NAP1L5,SMARCA5,CNNH,H2AFV,MNAT1,POLR2D,TAF9B,SLC22A4,POLR2F,HIST1H4M,ASF1A,H3F3A,TAF11,ETF2H3,HIST1H1A,NAP1L2,ETF2E2,ETF2A2,H1F0,NAT14,ETF2F1,TSPYL3,MIS12,TSPYL1,SUPT3H,NAP1L3,HIST4H4,CHAF1B,TBP,POLR2B,HP1BP3,MED16,HIST2H3C1,TAF12,H2AFY,HIST1H4F,ETF2H2,HIST1H3G,HMGB2,TBPL1,POLR2G,HIST1H3A,MED4,HIST2H3B,HIST1H2AB,E2F2,HIST1H4B,HIST3H2A,ETF2H1,H2AFZ,TAF9,MED17,PPARGC1A,TSPYL4,CDK7,HIST1H2AK,H2AFX,HELLS,MCM2,HIST2H4,NAP1L1,HIST1H2AE,RRN3,POLR2C,HIST1H2BG,SNAPC5,HIST1H2AN,HIST3H2BB,H2AFY2,BRF2,HIST1H2BL,H2AFJ,TAF13,HIST2H2AA2,NAP1L4,ETF3C4,HIST2H2AA1,HIST1H1C,ETF2F2,CDK9,E2F3,POLR2E,HIST1H2AO,PTFR,HIST1H2BN,HIST2H2AC,TAF5,HIST1H2AF,ETF2E1,MED7,HIST1H1B,HIST1H3F,HIST1H4H,SET,MED26,PKN3,TBPL2,HIST2H2BB,1700054O13RIK,SOS2,CHAF1A,TMEM38B,HIST1H2BF,ASF1B,MED24,TAF10,ETF2A1L,ERCC3,HIST1H2BH,POLR2L,CENPF,HIST1H2AC,HIST1H1E,POLR2K,MED30,HIST1H2BB,CENPE,HIST1H4J,HMGB1,ETF2I,TF1,HIST1H2BC,HIST1H2BA,ETF2B,1700024P04RIK,ETF2A1,HIST2H2BE,HIST1H1D,HIST1H4D,TSPYL5,ETF2H4,HIST2H3C2,ERCC2,HIST1H3D,MED1,RSF1,HIST1H2BM,MED23,CAND1,HIST3H2BA,SHPRH,HIST1H2AA,HILS1,ATF7IP,HIST1H4I,MAZ,MYC,HIST1H1T,LIPE,TSPYL2,TAF2,TAF6L,H1FOO,POLR2H,PIGU,PIGH,PIGG,FRAG1,DPM1,PIGF,PIGA,PIGK,PIGX,PIGW,PIGQ,PIGL,PIGW,DPM2,PIGB,PIGN,PLAUR,PIGP,PGAP1,DPM3,PIGS,GPA1,PIGY,PIGT,C130090K23RIK,PIGO,PIGC,SEMA6D,PIGM,PIGZ,PERLD1 |
| GO:000650              | 0.411145 | 0       | 0   | 31              | GPI anchor biosynthetic process              | PIGU,PIGH,PIGG,FRAG1,DPM1,PIGF,PIGA,PIGK,PIGX,PIGW,PIGQ,PIGL,PIGW,DPM2,PIGB,PIGN,PLAUR,PIGP,PGAP1,DPM3,PIGS,GPA1,PIGY,PIGT,C130090K23RIK,PIGO,PIGC,SEMA6D,PIGM,PIGZ,PERLD1                                                                                                                                                                                                                                                                                                                                                                                                                                                                                                                                                                                                                                                                                                                                                                                                                                                                                                                                                                                                                                                                                                                                                                                                |
| GO:000918              | 0.409825 | 0       | 0   | 13              | ribonucleoside diphosphate metabolic process | ATP5B,NUDT9,ENTPD1,ATP5A1,ENTPD2,CANT1,ATP5C1,NUDT5,ATP5D,ATP5E,ENTPD4,AK5,ENTPD7                                                                                                                                                                                                                                                                                                                                                                                                                                                                                                                                                                                                                                                                                                                                                                                                                                                                                                                                                                                                                                                                                                                                                                                                                                                                                         |
| GO:000931              | 0.409531 | 0       | 0   | 83              | amine catabolic process                      | HIBCH,GAD1,ACHE,AUH,6530401N04RIK,HDC,GSTZ1,MTHFD1,SAT1,GAD2,MOXD1,BCKDHB,DDO,DTD1,CDO1,ARG2,PTS,ASL,MCCC2,QDPR,GOT1,HPD,AHCY,PRODH2,PCCA,BCKDHA,ASRGL1,GOT2,KYNU,INDO,SMOX,GCSH,DHPS,ACAD8,PCCB,MAOA,ALDH6A1,COMT,BCAT1,DDAH1,INDOL1,SARDH,AASS,ASPA,DBH,TDO2,AADAT,PRODH,PAOX,4930402E16RIK,BCKDK,DDAH2,FRRS1,GCH1,DIO3,DMGDH,COLQ,KMO,ARG1,UROC1,A230051G13RIK,GLUD1,CSAD,SLC6A3,DIO2,MCCC1,SHMT1,BCAT2,GLS,HGD,MOXD2,ALDH4A1,PADI3,HAL,AMDHD1,LAO1,GLDC,PAH,AMT,FTCD,TAT,FAH,AFMID                                                                                                                                                                                                                                                                                                                                                                                                                                                                                                                                                                                                                                                                                                                                                                                                                                                                                    |

**Table S3A. Gene sets up-regulated by severe stress plus morphine**

| Gene Ontology category | Score    | p-value | FDR | Gene set length | Gene_set_description                                                                 | Gene_set_genes                                                                                                                                                                                                                                                                                                                                                                                                                                                                                                                                                                                                                                                                                                                                                                                                                                                                                                                                             |
|------------------------|----------|---------|-----|-----------------|--------------------------------------------------------------------------------------|------------------------------------------------------------------------------------------------------------------------------------------------------------------------------------------------------------------------------------------------------------------------------------------------------------------------------------------------------------------------------------------------------------------------------------------------------------------------------------------------------------------------------------------------------------------------------------------------------------------------------------------------------------------------------------------------------------------------------------------------------------------------------------------------------------------------------------------------------------------------------------------------------------------------------------------------------------|
| GO:0022618             | 0.408437 | 0       | 0   | 113             | ribonucleoprotein complex assembly                                                   | PAIP2,LSM2,SNRPG,EIF1AD,EIF4E,EIF2AK3,4930503E24RIK,SNRPD2,PRPF31,EIF4H,EIF1,SNRPE,EIF3H,SF3A3,EIF4B,IMPACT,CRNKL1,DAZL,SMNDC1,DDX20,EIF2B1,EIF2B3,SLU7,EIF1A,EIF2B4,EIF3D,EIF3J,PRPF6,NPM1,PAIP1,MTIF3,PPP1R15B,EIF2S1,EIF3F,LGTN,RPS3A,MTIF2,HSPB1,EIF5B,EIF4E2,DDX1,EIF3K,EIF2B5,NIP7,DENR,EIF2S2,SFRS9,EIF5,USP39,RPS14,BOLL,EIF2S3X,EIF2B2,EIF2AK4,EIF4A2,EIF2A,SMN1,EIF1B,EIF3I,EIF1AY,EIF3C,SFRS1,EIF3G,FUSIP1,EIF6,TSR1,TRMT6,SF3A1,SNRPD1,SIP1,EIF5A,EIF5A2,SF3A2,PTBP2,MBNL1,EIF4EBP1,SRPK2,EIF3E,BZW1,2410018C20RIK,PAIP2B,TXNL4A,GATC,BZW2,GTF2B,CUGBP1,BMS1,SFRS2IP,EIF4EBP3,EIF4G2,DDX23,EIF4EBP2,EIF4E1B,EIF3B,EIF2AK1,SFRS6,SFRS5,SURF6,EIF4E3,TNF,DICER1,SF1,EIF4G1,GEMIN6,ASCC3L1,BRUNOL4,EIF2C1,CUGBP2,BRF1,ATXN2,SFRS8,DMXL2,EIF4G3                                                                                                                                                                                                    |
| GO:0009061             | 0.407522 | 0       | 0   | 72              | amino acid catabolic process                                                         | HIBCH,GAD1,AUH,6530401N04RIK,HDC,GSTZ1,MTHFD1,GAD2,MOXD1,BCKDHB,DDO,DTD1,CDO1,ARG2,PTS,ASL,MCCC2,QDPR,GOT1,HPD,AHCY,PRODH2,PCCA,BCKDHA,ASRGL1,GOT2,KYNU,INDO,GCSH,ACAD8,PCCB,ALDH6A1,BCAT1,DDAH1,INDOL1,SARDH,AASS,ASPA,DBH,TDO2,AADAT,PRODH,4930402E16RIK,BCKDK,DDAH2,FRRS1,GCH1,DMGDH,KMO,ARG1,UROC1,A230051G13RIK,GLUD1,CSAD,MCCC1,SHMT1,BCAT2,GLS,HGD,MOXD2,ALDH4A1,PADI3,HAL,AMDHD1,LAO1,GLDC,PAH,AMT,FTCD,TAT,FAH,AFMID                                                                                                                                                                                                                                                                                                                                                                                                                                                                                                                              |
| GO:0000398             | 0.406435 | 0       | 0   | 147             | nuclear mRNA splicing, via spliceosome                                               | SF3B5,LSM2,POLR2J,POLR2I,SNRPG,SNRPA1,CLNS1A,POLR2D,NOVA1,POLR2F,SNRPD2,CSTF1,PRPF31,DNAJC8,SNRPE,MAGOH,SF3A3,HNRNPC,GTF2F1,CPSF3,DDX39,LSM3,HNRNPR,CRNKL1,POLR2B,SNRPF,CLP1,SMNDC1,SNRBP,SNW1,DDX20,SLU7,CCAR1,NHP2L1,POLR2G,DBR1,LSM7,SF3B4,GEMIN8,PRPF6,CWC15,PHF5A,SNRPD3,LSM8,TXNL4B,CSTF3,HNRNPA1,NCBP2,TGS1,HNRNPL,PRMT5,PCBP2,DDX1,POLR2C,NUDT21,FUS,RBM8A,SFRS9,USP39,THOC4,RNPS1,SFRS3,SF3B2,WDR77,CDC40,YBX1,UPF3B,SNRPB2,GTF2F2,PRPF4,SMN1,POLR2E,SMC1A,PTBP1,CPSF1,PRPF3,U2AF1,SNRPA,SFRS1,FUSIP1,DHX38,SFRS10,SF3A1,SNRPD1,SIP1,CSTF2,SF3A2,EFTUD2,PTBP2,POLR2L,NFX1,SF4,MBNL1,SRPK2,BAT1A,POLR2K,TXNL4A,PCF11,RNUXA,PPP1R8,SFRS7,PCBP1,DHX9,GATC,SF3B1,CUGBP1,HNRNPU,DHX16,SF3B3,SRRM1,CD2BP2,U2AF2,SFRS2IP,RBM25,CPSF2,KHSRP,SFRS4,HNRNPD,PAPOLA,DDX23,SNUPN,SFRS2,HNRPUL1,GEMIN5,SFRS6,SFRS5,SFRS11,GEMIN4,POLR2H,RBMX,MYOD1,HNRNPA2B1,SF1,GEMIN6,ASCC3L1,BRUNOL4,RBM5,HNRNPA0,CUGBP2,PABPN1,TRA2A,POLR2A,PRPF8,GEMIN7,SNRP70,SFRS8,TNRC4 |
| GO:0000377             | 0.406435 | 0       | 0   | 147             | RNA splicing, via transesterification reactions with bulged adenosine as nucleophile | SF3B5,LSM2,POLR2J,POLR2I,SNRPG,SNRPA1,CLNS1A,POLR2D,NOVA1,POLR2F,SNRPD2,CSTF1,PRPF31,DNAJC8,SNRPE,MAGOH,SF3A3,HNRNPC,GTF2F1,CPSF3,DDX39,LSM3,HNRNPR,CRNKL1,POLR2B,SNRPF,CLP1,SMNDC1,SNRBP,SNW1,DDX20,SLU7,CCAR1,NHP2L1,POLR2G,DBR1,LSM7,SF3B4,GEMIN8,PRPF6,CWC15,PHF5A,SNRPD3,LSM8,TXNL4B,CSTF3,HNRNPA1,NCBP2,TGS1,HNRNPL,PRMT5,PCBP2,DDX1,POLR2C,NUDT21,FUS,RBM8A,SFRS9,USP39,THOC4,RNPS1,SFRS3,SF3B2,WDR77,CDC40,YBX1,UPF3B,SNRPB2,GTF2F2,PRPF4,SMN1,POLR2E,SMC1A,PTBP1,CPSF1,PRPF3,U2AF1,SNRPA,SFRS1,FUSIP1,DHX38,SFRS10,SF3A1,SNRPD1,SIP1,CSTF2,SF3A2,EFTUD2,PTBP2,POLR2L,NFX1,SF4,MBNL1,SRPK2,BAT1A,POLR2K,TXNL4A,PCF11,RNUXA,PPP1R8,SFRS7,PCBP1,DHX9,GATC,SF3B1,CUGBP1,HNRNPU,DHX16,SF3B3,SRRM1,CD2BP2,U2AF2,SFRS2IP,RBM25,CPSF2,KHSRP,SFRS4,HNRNPD,PAPOLA,DDX23,SNUPN,SFRS2,HNRPUL1,GEMIN5,SFRS6,SFRS5,SFRS11,GEMIN4,POLR2H,RBMX,MYOD1,HNRNPA2B1,SF1,GEMIN6,ASCC3L1,BRUNOL4,RBM5,HNRNPA0,CUGBP2,PABPN1,TRA2A,POLR2A,PRPF8,GEMIN7,SNRP70,SFRS8,TNRC4 |
| GO:0065001             | 0.399853 | 0       | 0   | 69              | intracellular protein transport across a membrane                                    | TIMM8B,TMEM48,TOMM22,1700034H14RIK,TIMM17A,SIL1,TIMM8A1,DDX19A,NUP43,NUP50,TRAM1L1,TIMM22,DNAJC19,TIMM9,TIMM23,SEC61G,RANBP17,SEC61A1,CHCHD4,NUPL2,D3UCLA1,NUP107,MAGMAS,NUP37,NUP35,TRAM1,NUP85,TIMM17B,SEC61B,NUP153,NUP88,TIMM10,NUP62,XPO7,TIMM50,NUP133,GLE1,NUP54,RRBP1,TIMM8A2,SEH1L,DDX19B,ABRA,NUP155,SEC61A2,NUPL1,ZMAT3,PEX14,NUP188,NUP210,SEC62,TIMM13,SEN2,PEX6,TIMM44,NUP205,MVP,NUP93,FXC1,RANBP2,1500001M20RIK,SERP2,NUP98,NUP160,TNKS,TRAM2,NUP214,POM121,TPR                                                                                                                                                                                                                                                                                                                                                                                                                                                                            |
| GO:0043521             | 0.394791 | 0       | 0   | 46              | negative regulation of neuron apoptosis                                              | GRIK2,PRDX3,AGT,HRAS1,XRCC4,F2R,PSEN1,GCLC,PPT1,CLN3,ADORA2A,AGTR1B,DLX1,BCL2L1,XRCC2,TGFA,WFS1,RHOA,ROCK1,GCLM,ERBB3,PRDX2,GDF5,SOD1,GDNF,BAX,NEFL,BARHL1,AGTR1A,ADNP,KRAS,SNCA,BDNF,NRAS,BIRC5,MSH2,PCSK6,LIG4,AGTR2,RASA1,FURIN,FGF8,BCL2,TRP73,HTT,CACNA1A                                                                                                                                                                                                                                                                                                                                                                                                                                                                                                                                                                                                                                                                                             |
| GO:0043241             | 0.393557 | 0       | 0   | 22              | protein complex disassembly                                                          | MTERFD3,ETF1,MTERF,HRSP12,XRN2,SUPT16H,SMARCE1,MTRF1L,ICT1,PTRF,SET,CEBPG,TNP1,IRAK3,TTF2,NRG1,TTF1,MTRF1,MAZ,2810006K23RIK,UPF1,HMGA1                                                                                                                                                                                                                                                                                                                                                                                                                                                                                                                                                                                                                                                                                                                                                                                                                     |
| GO:0006501             | 0.391832 | 0       | 0   | 32              | GPI anchor metabolic process                                                         | PIGU,PIGH,PIGG,FRAG1,DPM1,PIGF,PIGA,PIGK,PIGX,PIGV,PIGQ,PIGL,PIGW,DPM2,PIGB,PIGN,PLAUR,PIGP,GPLD1,PGAP1,DPM3,PIGS,GPA1,PIGY,PIGT,C130090K23RIK,PIGO,PIGC,SEMA6D,PIGM,PIGZ,PERLD1                                                                                                                                                                                                                                                                                                                                                                                                                                                                                                                                                                                                                                                                                                                                                                           |
| GO:0006671             | 0.389478 | 0       | 0   | 37              | ceramide metabolic process                                                           | PPAP2A,HEXA,PPP2CA,GLA,HEXB,CLN3,CLN8,SMPD1,GM2A,PHCA,ASAH1,ITGB8,UGCG,ASAH2,ALDH5A1,LASS5,GALC,LASS2,N SMAF,CLN6,LYPLA3,GAL3ST1,ASAH3L,SGPL1,PRKAA1,ST6GALNAC6,SMPD2,ST6GALNAC1,CERK,PPP2R1A,ST3GAL5,CEL,LASS6,LASS4,ASAH3,B4GALNT1,NEU3                                                                                                                                                                                                                                                                                                                                                                                                                                                                                                                                                                                                                                                                                                                  |
| GO:0032981             | 0.388094 | 0       | 0   | 25              | macromolecular complex disassembly                                                   | MTERFD3,ETF1,MTERF,HRSP12,XRN2,SUPT16H,SMARCE1,MTIF3,MTRF1L,ICT1,PTRF,SET,HMOX1,CEBPG,TNP1,APOE,IRAK3,TTF2,NRG1,TTF1,MTRF1,MAZ,2810006K23RIK,UPF1,HMGA1                                                                                                                                                                                                                                                                                                                                                                                                                                                                                                                                                                                                                                                                                                                                                                                                    |
| GO:0015981             | 0.38608  | 0       | 0   | 14              | energy coupled proton transport, against electrochemical gradient                    | ATP6V1H,ATP6V0E2,ATP6V1E1,ATP6V0E,ATP6V0B,ATP1A1,ATP6V1B2,ATP1A4,ATP6V0A4,ATP6V1B1,ATP1A2,ATP6V1E2,ATP6V1G3,ATP1A3                                                                                                                                                                                                                                                                                                                                                                                                                                                                                                                                                                                                                                                                                                                                                                                                                                         |

**Table S3A. Gene sets up-regulated by severe stress plus morphine**

| Gene Ontology category | Score    | p-value | FDR | Gene set length | Gene_set_description                       | Gene_set_genes                                                                                                                                                                                                                                                                                                                                                                                                                                                                                                                                                                                                                                                                                                                                                                                                                                                                                                                            |
|------------------------|----------|---------|-----|-----------------|--------------------------------------------|-------------------------------------------------------------------------------------------------------------------------------------------------------------------------------------------------------------------------------------------------------------------------------------------------------------------------------------------------------------------------------------------------------------------------------------------------------------------------------------------------------------------------------------------------------------------------------------------------------------------------------------------------------------------------------------------------------------------------------------------------------------------------------------------------------------------------------------------------------------------------------------------------------------------------------------------|
| GO:0006778             | 0.382338 | 0       | 0   | 18              | porphyrin biosynthetic process             | SUCLA2,CPOX,UROS,ALAD,NFE2L1,UROD,COX15,RSAD1,TSPO,MMAB,IREB2,FECH,HMBS,ALAS1,ALAS2,HNF1A,PPOX,COX10                                                                                                                                                                                                                                                                                                                                                                                                                                                                                                                                                                                                                                                                                                                                                                                                                                      |
| GO:0009061             | 0.379596 | 0       | 0   | 26              | serine family amino acid metabolic process | NFS1,PSPH,SEPHS2,PSAT1,GCLC,SHMT2,CDO1,DHFR,SRR,GCSH,SARDH,GCLM,AGXT,4930402E16RIK,PHGDH,FIGS,DMGDH,BAT,AT,A230051G13RIK,CSAD,CTH,SHMT1,SDS,CBS,GLDC,AMT                                                                                                                                                                                                                                                                                                                                                                                                                                                                                                                                                                                                                                                                                                                                                                                  |
| GO:0016234             | 0.379043 | 0       | 0   | 16              | macroautophagy                             | PSEN1,CLN3,ATG16L1,ATG4C,ATG5,ATG4D,ATG12,ATG4B,CTSD,BECN1,MAP1LC3A,ATG9A,NPC1,ATG4A,FRAP1,ATG9B                                                                                                                                                                                                                                                                                                                                                                                                                                                                                                                                                                                                                                                                                                                                                                                                                                          |
| GO:0007001             | 0.377197 | 0       | 0   | 133             | mitochondrion organization and biogenesis  | RNF7,TIMM8B,MRPL17,TRNT1,NDUFS5,RRM2B,TOMM22,KIF5B,TIMM17A,TFAM,TIMM8A1,AIP,MTERF,MTX2,PSEN1,GPX1,DNAJA3,PMPCB,MAP3K1,MRPL39,IMMP2L,SLC25A14,CLN8,DNAJC19,TIMM9,VDAC1,NDUFS4,SOD2,TIMM23,SLC25A20,STARD3,NDUFS7,SEPT4,CPT2,NRF1,TFB2M,BCL2L1,DCTN6,SLC25A17,MRPL15,MIPEP,PIM2,FIS1,PLEKHF1,PPARGC1A,HSPD1,TOMM20,BHLHB8,CASP7,SLC37A2,DAP3,CSTAD,MFN1,NDUFS8,MUL1,TIMM17B,SLC25A4,PMAIP1,SLC25A15,MRPL12,GRPEL1,TSPO,1700020C11RIK,TIMM10,SLC25A13,TOMM40,SLC25A32,COX18,TIMM50,HTRA2,CEBPA,MSTO1,PEX5,SLC25A1,TRP53,AIFM1,YWHAZ,BAX,TIMM8A2,MAN2A1,CASP3,MPV17,SLC25A12,DNM1L,UCP2,UCP3,SLC22A5,TOMM34,SLC25A30,TIMM13,RAB3A,HSP90AA1,SLC25A27,AIFM2,CDKN2A,SLC25A10,SLC25A24,TIMM44,BID,ATP7A,TAZ,LONP1,SLC25A37,MYC,SPG7,POLRMT,OPA1,FXC1,CAV2,UCP1,CPT1B,JUN,BAK1,SH3GLB1,POLG,TYMP,COX10,CCK,MFN2,BBC3,FXN,SLC1A3,AKT1,BNIP3,BCL2,CD24A,CXADR,SLC25A36,TRP73,SFN,EPAS1,HTT,SLC25A2                                                   |
| GO:0006878             | 0.375105 | 0       | 0   | 9               | cellular copper ion homeostasis            | COMMD1,SCO1,ATP7B,PRND,APLP2,APP,PRNP,ATP7A,ATOX1                                                                                                                                                                                                                                                                                                                                                                                                                                                                                                                                                                                                                                                                                                                                                                                                                                                                                         |
| GO:0015801             | 0.369733 | 0       | 0   | 18              | acidic amino acid transport                | PRAF2,PSEN1,ARL6IP5,CLN8,SLC6A1,SLC17A8,SLC1A1,SLC1A6,SLC25A4,SLC25A13,LTA,SLC25A12,SLC25A22,PRKCD,TNF,SLC1A2,SLC1A3,HTT                                                                                                                                                                                                                                                                                                                                                                                                                                                                                                                                                                                                                                                                                                                                                                                                                  |
| GO:0009161             | 0.366306 | 0       | 0   | 148             | nucleotide biosynthetic process            | ADK,PPAT,ADSSL1,GUCY2F,ATP5L,RRM2B,ADAL,CMPK2,PRPSAP2,MTHFD1,NME3,ATP6V1F,NME7,G6PDX,ATP5G2,GUCY1B3,ADSL,DHODH,GRM8,ATP5B,NT5E,ATP5G3,GUCY1A3,RBM3,PAPSS1,ADORA2A,NMNAT2,ATP6AP1,HPRT1,DHFR,RP2H,PTHLH,TBPL1,NME5,ATP6V0B,DTYMK,GUCA1A,DRD1A,ATP6V0C,AMPD3,NME1,ATP5H,PTH,ADCY10,KYNU,CMPK1,ATP5F1,ATP5A1,ADCY5,ADCY3,GMPS,NMNAT1,PRPS1,NPPA,GUCY2D,NME4,UMPS,ATP5J,ATP5G1,NAPRT1,ATP5O,PAICS,ATP5C1,TXNDC3,GUCY1B2,ATP5K,PRPS2,ITGB1BP3,PNP1,GUCY2E,DECR2,ATP6V1B2,SLC25A13,RRM1,IMPDH2,QPRT,ATP5D,UCN2,CLCA3,ATP5E,LDHD,ATP5J2,PRPS1L1,TGFB1,RXFP2,GART,ATP6V1B1,BC016495,CTPS,GUCY2G,ATP6V0D2,RP1H,APOE,TYMS,NPY2R,EDN1,0610012D14RIK,ATIC,ABCA1,ARRB2,DRD5,CTPS2,ENTPD8,EDNRA,NME6,NPR1,ATP6V1A,NPPC,ADSS,NME2,ARRB1,AMPD1,THTPA,DCTD,ND4L,NADSYN1,PDZD3,MSH2,ADM,NMNAT3,NAMPT,AMPD2,ADCY2,ADCY8,CAD,PRPSAP1,IMPDH1,ADCY7,ADCY4,PTH2,RLN3,NPR2,NPPB,RRM2,ADCY9,GUCY2C,ADCY1,AVP,ADA,ME1,PFAS,PALM,AK5,MON2,ADCY6,INSL3,GUCA2B,GUCY1A2 |
| GO:0051601             | 0.356819 | 0       | 0   | 23              | protein maturation                         | ATP6AP2,AIP,SRGN,PSEN1,ADAMTS3,STUB1,PSENE1,WFS1,CPE,PCSK2,PCSK9,NCSTN,ADAM10,DNER,PSEN2,ASPRV1,APH1A,PCSK1,PCSK6,PCSK5,CORIN,FURIN,ADAMTS2                                                                                                                                                                                                                                                                                                                                                                                                                                                                                                                                                                                                                                                                                                                                                                                               |
| GO:0006741             | 0.355603 | 0       | 0   | 11              | NADPH regeneration                         | HIBADH,G6PDX,H6PD,PGD,TALDO1,3930401K13RIK,TPI1,HSD11B1,RPIA,TKT,PGLS                                                                                                                                                                                                                                                                                                                                                                                                                                                                                                                                                                                                                                                                                                                                                                                                                                                                     |
| GO:0046471             | 0.348203 | 0       | 0   | 58              | glycerophospholipid biosynthetic process   | PIGU,PIGH,IMPA1,PIGG,PCYT1A,FRAG1,PTDSS1,DPM1,CHPT1,PIGF,PIGA,CDIPT,CD81,PIGK,FGF7,PHKA1,PI4K2A,PIK3C2A,PIGX,PIGV,PIGQ,PIGL,PIGW,DPM2,AGPAT1,PIGB,FABP5,PI4KB,PIGN,PLAUR,PIGP,FABP3,PIP4K2C,PEMT,PGAP1,DPM3,PIGS,GPA1,PIGY,AGPAT2,PIGT,C130090K23RIK,APOA1,PIGO,TAZ,PTDSS2,PDGFA,CHKA,PIGC,LCAT,PCYT1B,SH3GLB1,SEMA6D,PIGM,PDGFB,PIGZ,PI4KA,PERLD1                                                                                                                                                                                                                                                                                                                                                                                                                                                                                                                                                                                        |
| GO:0006771             | 0.347741 | 0       | 0   | 26              | porphyrin metabolic process                | BLVRA,SUCLA2,CPOX,UROS,HMOX2,ALAD,NFE2L1,UROD,COX15,RSAD1,TSPO,CYB5R4,MMAB,IREB2,HMOX1,FECH,HMBS,ALAS1,CYP1A2,HEBP1,ALAS2,AMBP,HNF1A,GIF,PPOX,COX10                                                                                                                                                                                                                                                                                                                                                                                                                                                                                                                                                                                                                                                                                                                                                                                       |
| GO:0046511             | 0.3447   | 0       | 0   | 40              | sphingoid metabolic process                | PPAP2A,HEXA,PPP2CA,GLA,HEXB,CLN3,CLN8,SMPD1,GM2A,PHCA,ASAHI,ITGB8,UGCG,SGPP1,ASAHD,ALDH5A1,LASS5,GALC,LASS2,NSMAF,CLN6,LYPLA3,GAL3ST1,ASAH3L,SGPL1,PRKAA1,ST6GALNAC6,SMPD2,ST6GALNAC1,CERK,SPHK2,PPP2R1A,ST3GAL5,CEL,LASS6,LASS4,ASAH3,B4GALNT1,SPHK1,NEU3                                                                                                                                                                                                                                                                                                                                                                                                                                                                                                                                                                                                                                                                                |
| GO:0051261             | 0.336586 | 0       | 0   | 26              | protein tetramerization                    | MTMR2,ACHE,PCBD1,ADSL,HPRT1,ATPIF1,ALDH5A1,PDSS2,ACTN2,TH,CDA,AASS,GFPT1,APOE,GPX3,PCBD2,CAT,PDSS1,IGF1R,TRPV5,TGM3,SHMT1,SBF2,TRP63,IDE,INSR                                                                                                                                                                                                                                                                                                                                                                                                                                                                                                                                                                                                                                                                                                                                                                                             |

Table S3A. Gene sets up-regulated by severe stress plus morphine

| Gene Ontology category | Score    | p-value | FDR | Gene set length | Gene_set_description                          | Gene_set_genes                                                                                                                                                                                                                                                                                                                                                                                                                                                                                                                                                                                                                                                                                                                                                                                                                                                                                                                                                                                                                                                                                                                                                                                                                                                                         |
|------------------------|----------|---------|-----|-----------------|-----------------------------------------------|----------------------------------------------------------------------------------------------------------------------------------------------------------------------------------------------------------------------------------------------------------------------------------------------------------------------------------------------------------------------------------------------------------------------------------------------------------------------------------------------------------------------------------------------------------------------------------------------------------------------------------------------------------------------------------------------------------------------------------------------------------------------------------------------------------------------------------------------------------------------------------------------------------------------------------------------------------------------------------------------------------------------------------------------------------------------------------------------------------------------------------------------------------------------------------------------------------------------------------------------------------------------------------------|
| GO:004425              | 0.331021 | 0       | 0   | 232             | cellular protein catabolic process            | CLPP,PSMB5,SMURF2,UFD1L,BUB3,CYLD,USP45,PSMD10,PSMB2,USP21,SKP1A,PSMA6,RBX1,TSG101,FBXO32,GCLC,USP28,PP T1,UBE2L3,UCHL3,CCNB1,BTRC,SMURF1,FBXO7,PSMA2,CDC23,MAP3K1,PSMF1,RNF217,USP8,CUL4B,UBE2B,FBXL4,PSMD12, CDC2A,CLN8,FBXO8,UBE2C,NEDD8,PSMA5,DERL2,STUB1,PSMB4,UBE2D2,PSMC2,PSMD9,PSMA3,RAD23B,UBE2A,TCEB1,PSM B6,USP30,UCHL5,PSMD13,SQSTM1,PSMD5,UCHL5IP,UBE2D3,USP54,CUL5,ZMPSTE24,PSMC6,PSMA4,USP29,UBE1Y1,PSMB7, PSMC4,USP11,BAP1,PSMB1,RNF6,UBE2H,ISG15,PSMC5,MAN1B1,FAF1,PSME2,SYVN1,PSMA1,PSME1,CUL3,PSMD14,DERL1,U SP5,PSMD8,UBE2G1,UHRF2,PLG,CHFR,USP39,USPL1,ARIH2,PSMB3,PPP2CB,CDC26,FBXO2,UCHL4,CUL7,UBE2E1,ANAPC11,AN APC7,LNX1,TOM1L1,USP26,USP33,PSMD6,USP4,MAD2L1,PARK2,USP27X,USP7,USP2,USP47,PSMD11,ATE1,CUL2,PCYOX1,SKP 2,USP18,UBE2K,PSMD4,RNF144B,USP37,USP1,PSMD7,AMFR,USP10,PSMA7,CUL1,PSMC3,CDC20,USP14,ANAPC2,FBXL12,TRI M63,UBE2L6,PSMB9,FBXO22,USP15,USP44,UBE2I,USP35,USP49,ANAPC10,USP13,CDC16,PCNP,DERL3,ARIH1,UBB,UBE3A,FBX W4,PSMC1,RAD23A,FBXO21,UBE2N,RNF11,UCHL1,USP25,DUB1,PSMD1,FBXO11,ANAPC4,2700078E11RIK,BUB1B,SIAH2,FBX O6,ITCH,TAP1,PSMB11,ANAPC5,PSMB8,EDEM3,SIAH1B,PSMD3,CPA2,USP42,PSMA8,VCP,USP9Y,USP46,USP38,USP48,PSME3, UBE2D1,SHH,USP50,EDEM1,HDAC6,CUL4A,CDC27,PPP2R5C,GGNBP1,CBLC,NPLOC4,FBXL7,USP3,USP52,USP16,USP22,SIAH1A, |
| GO:000641              | 0.329969 | 0       | 0   | 135             | regulation of translation                     | PAIP2,ETF1,SRP9,1110005A23RIK,F2R,MAPK3,EIF4E,EIF2AK3,4930503E24RIK,RPS18,EIF4H,EIF1,CDK4,NANOS1,EIF3H,ANG3,E IF4B,EIF4A3,HRSP12,IMPACT,DAZL,SRP14,NGDN,SECISBP2,ANG,EIF2B1,EIF2B3,PPP1CA,EIF2B4,DNAJC1,EIF3D,EIF3J,HBEGF,SE PSEC5,PAIP1,MTIF3,PPP1R15B,EIF2S1,EIF3F,IGF2BP2,FMR1,MTIF2,HSPB1,EIF5B,DDX25,RHOA,EIF4E2,DDX1,EIF3K,EIF2B5,EIF5 ,EEFSEC,MIF4GD,MAPK1,PTGFRN,SCAP,BOLL,EIF2B2,IL6,EIF2AK4,NCK1,PA2G4,EIF4A2,PUM2,EIF2A,ZFP36L1,EIF1B,TRSPAP1,E IF3I,MTPN,EIF3C,EIF3G,MYD116,IIEB2,TRMT6,PRKRIR,TIA1,APLP1,QQ,TGFB1,EIF5A,MVK,MKNK1,SAMD4,PRG3,EIF4EBP1,ADA D1,PRKAA1,EIF3E,BZW1,PAIP2B,METAP1,BARHL2,GATC,BZW2,MTRF1,APP,NDUFA13,IGF2BP1,EIF4EBP3,NANOS2,NCK2,EIF4G 2,TSC1,IGF1,F2,EIF4EBP2,UCN,CD28,EIF2AK1,MKNK2,KRT7,PSTK,CPEB1,DIO2,ACO1,BCL3,IGF2BP3,EIF4E3,PTK2B,PUM1,TNF,E IF4G1,PDGFRB,UPF1,AKT1,EIF2C1,CPEB2,KRT17,PRKCA,NANOS3,GCN1L1,ATXN2,EIF4G3,YBX2                                                                                                                                                                                                                                                                                                                                                                                                          |
| GO:003112              | 0.327893 | 0       | 0   | 20              | RNA 3'-end processing                         | TRNT1,CSTF1,CPSF3,SLBP,GRSF1,PAPOLG,LSM10,CSTF3,CPSF1,APLP1,CSTF2,PABPC2,APP,CSTF2T,PABPC1,PAPOLA,PAPOLB,BA RD1,CSDC2,PABPN1                                                                                                                                                                                                                                                                                                                                                                                                                                                                                                                                                                                                                                                                                                                                                                                                                                                                                                                                                                                                                                                                                                                                                           |
| GO:000640              | 0.3209   | 0       | 0   | 36              | mRNA catabolic process                        | LSM2,AUH,PARN,DCPS,MAGOH,EIF4A3,LSM7,LSM6,SMG7,RNH1,UPF2,RBM8A,SMG6,LSM5,RNPS1,PNPT1,UPF3B,SMG5,ZFP3 6L1,UPF3A,EXOSC10,DCP1B,MEX3D,ZFP36,DCP1A,PAN3,ZHX2,USP52,GSPT1,MLH1,UPF1,ZFP36L2,HSPA1B,DCP2,ZFP36L3,261 0207I05RIK                                                                                                                                                                                                                                                                                                                                                                                                                                                                                                                                                                                                                                                                                                                                                                                                                                                                                                                                                                                                                                                              |
| GO:004339              | 0.319954 | 0       | 0   | 21              | regulation of protein binding                 | PCBD1,EIF2AK3,PSEN1,PRMT8,AKTIP,LDLRAP1,ADRB2,SMARCD3,MAP1LC3B,GTPBP4,BAX,ATR,TGFBR3,NRG1,PRMT7,ARRB2, ADRB3,ARRB1,TICAM1,BAK1,BCL2                                                                                                                                                                                                                                                                                                                                                                                                                                                                                                                                                                                                                                                                                                                                                                                                                                                                                                                                                                                                                                                                                                                                                    |
| GO:000651              | 0.317419 | 0       | 0   | 221             | ubiquitin-dependent protein catabolic process | PSMB5,SMURF2,UFD1L,BUB3,CYLD,USP45,PSMD10,PSMB2,USP21,SKP1A,PSMA6,RBX1,TSG101,FBXO32,GCLC,USP28,UBE2L3, UCHL3,CCNB1,BTRC,SMURF1,FBXO7,PSMA2,CDC23,MAP3K1,PSMF1,RNF217,USP8,CUL4B,UBE2B,FBXL4,PSMD12,CDC2A,FBX O8,UBE2C,NEDD8,PSMA5,DERL2,STUB1,PSMB4,UBE2D2,PSMC2,PSMD9,PSMA3,RAD23B,UBE2A,TCEB1,PSMB6,USP30,UCHL5, PSMD13,SQSTM1,PSMD5,UCHL5IP,UBE2D3,USP54,CUL5,PSMC6,PSMA4,USP29,UBE1Y1,PSMB7,PSMC4,USP11,BAP1,PSMB1,R NMF6,UBE2H,PSMC5,MAN1B1,FAF1,PSME2,SYVN1,PSMA1,PSME1,CUL3,PSMD14,DERL1,USP5,PSMD8,UBE2G1,UHRF2,CHFR,U SP39,USPL1,ARIH2,PSMB3,PPP2CB,CDC26,FBXO2,UCHL4,CUL7,UBE2E1,ANAPC11,ANAPC7,LNX1,TOM1L1,USP26,USP33,PSMD 6,USP4,MAD2L1,PARK2,USP27X,USP7,USP2,USP47,PSMD11,ATE1,CUL2,SKP2,USP18,UBE2K,PSMD4,RNF144B,USP37,USP1,PS MD7,AMFR,USP10,PSMA7,CUL1,PSMC3,CDC20,USP14,ANAPC2,FBXL12,TRIM63,PSMB9,FBXO22,USP15,USP44,UBE2I,USP35, USP49,ANAPC10,USP13,CDC16,PCNP,DERL3,ARIH1,UBB,UBE3A,FBXW4,PSMC1,RAD23A,FBXO21,UBE2N,RNF11,UCHL1,USP25 ,DUB1,PSMD1,FBXO11,ANAPC4,2700078E11RIK,BUB1B,SIAH2,FBXO6,ITCH,TAP1,PSMB11,ANAPC5,PSMB8,EDEM3,SIAH1B,PS MD3,USP42,PSMA8,VCP,USP9Y,USP46,USP38,USP48,PSME3,UBE2D1,SHH,USP50,EDEM1,HDAC6,CUL4A,CDC27,PPP2R5C,GG NBP1,CBLC,NPLOC4,FBXL7,USP3,USP52,USP16,USP22,SIAH1A,DUB2,UBE2G2,PSMD2,USP19,PSMB10,UBE4A,ANAPC1,UBC,FZF  |
| GO:000673              | 0.31741  | 0       | 0   | 179             | coenzyme metabolic process                    | POLR3H,PDHB,COQ7,HIBADH,GLO1,GSTK1,SUCLA2,SUCLG1,MDH1,LDHB,GSR,MGST1,TPK1,GSTT2,MTHFD1,GCLC,G6PDX,FH1, GPX1,PIPOX,GPHN,MOCS2,COQ5,ATP5G3,GPX4,PDXK,LIAS,FOLH1,IDH3B,ACOT5,DBIL5,NMNAT2,DHFR,VNN1,ACO2,H6PD,CT NS,VKORC1,SCP2,DBI,SDHA,SUCLG2,ACOT1,SDHD,COQ6,SDHB,KYNU,DLD,MCEE,ACSS1,DLAT,INDO,MTHFD1L,OXSM,ALDH5A 1,RNASEL,MDH1B,PDSS2,NMNAT1,ACSL6,HAGH,POLR2C,SDHC,NAPRT1,ACOT3,OXCT1,COQ9,IDH3A,IDH3G,IDH2,GBA2,MLYC D,PGD,GCK,ITGB1BP3,NUDT7,MTHFD2,GLYAT,GCLM,QPRT,EHHADH,GSTP1,GSTP2,TXNRD3,MOCS3,TALDO1,SOD1,ALDH1L1,G STA3,TDO2,FOLR1,NADK,CBR2,3930401K13RIK,BC016495,GLRX2,PANK1,DLST,ACOT9,PDHA1,NNT,CS,MTHFS,MOCS,TPI1,AC OT2,HSD11B1,GPX3,0610012D14RIK,COQ4,PANK2,FPGS,GSS,GCDH,SEC16A,GNMT,COQ3,HMGCL,VNN3,ACACB,ACSS2,HAPO, MDH2,MOCS1,ACLY,PANK3,PDSS1,GGT7,KMO,GSTT3,ACMSD,PK4,GSTA1,SLC27A3,RP1A,COASY,HNF4A,ALDH1L2,NADSYN1, NCF1,ACOT8,COQ2,ACSM4,IDH1,CTH,NMNAT3,NAMPT,ACOT12,OXCT2A,NCF2,PANK4,PDHA2,SHMT1,GPD1,C1QL2,ACO1,GST T1,GGT1,MTHFR,CES3,LDHA,PPCDC,2610209A20RIK,MTHFSD,2610507B11RIK,NOX1,TKT,HMGCS1,ME1,HMGCGR,FTCD,GGT5,P GLS,ACACA,ACOT4,MTR,GGT6,DCXR,AFMID                                                                                                                                                                                    |

Table S3A. Gene sets up-regulated by severe stress plus morphine

| Gene Ontology category | Score    | p-value | FDR | Gene set length | Gene_set_description                                                | Gene_set_genes                                                                                                                                                                                                                                                                                                                                                                                                                                                                                                                                                                                                                                                                                                                                                                                                                                                                                                                                                                                                                                                                                                                                                                                                                                                         |
|------------------------|----------|---------|-----|-----------------|---------------------------------------------------------------------|------------------------------------------------------------------------------------------------------------------------------------------------------------------------------------------------------------------------------------------------------------------------------------------------------------------------------------------------------------------------------------------------------------------------------------------------------------------------------------------------------------------------------------------------------------------------------------------------------------------------------------------------------------------------------------------------------------------------------------------------------------------------------------------------------------------------------------------------------------------------------------------------------------------------------------------------------------------------------------------------------------------------------------------------------------------------------------------------------------------------------------------------------------------------------------------------------------------------------------------------------------------------|
| GO:0051188             | 0.316684 | 0       | 0   | 84              | cofactor biosynthetic process                                       | PDHB,COQ7,SUCLA2,TPK1,MTHFD1,GCLC,G6PDX,GPHN,MOCS2,COQ5,CPOX,UROS,PDXK,LIAS,NMNA2,DHFR,VKORC1,ALAD,COQ6,KYNU,DL,ACSS1,DLAT,MTHFD1L,NFE2L1,PDSS2,UROD,NMNA1,COX15,POLR2C,NAPRT1,COQ9,RSAD1,MLYCD,ITGB1B,P3,TSPO,MTHFD2,GCLM,QPRT,MMAB,MOCS3,IRESB2,ALDH1L1,FECH,BC016495,PANK1,HMBS,PDHA1,MTHFS,ALAS1,MOCOS,0610012D14RIK,COQ4,PANK2,FPGS,GSS,GCDH,COQ3,ACSS2,MOCS1,ACLY,PANK3,PDSS1,GGT7,PK4,ALAS2,COASY,NADSYN1,COQ2,HNF1A,NMNA3,NAMPT,PANK4,PDHA2,GGT1,PPOX,PPCDC,2610209A20RIK,COX10,MTHFSD,ME1,GGT5,MTR,GGT6                                                                                                                                                                                                                                                                                                                                                                                                                                                                                                                                                                                                                                                                                                                                                       |
| GO:0043111             | 0.31367  | 0       | 0   | 40              | receptor metabolic process                                          | GRIK2,CHMP5,ACHE,PICK1,FUT8,FNTA,DRD2,PLD2,MUSK,TRAPP4,CLEC2I,GRK4,CDK5,DRD3,SCAP,PAK1,IL10,ACE2,PCSK9,DOK7,APOE,NRG1,LRP4,AGTR1A,TRAT1,DLG2,RAB40C,GRIK5,CAML,DMD,TNF,PPARG,FURIN,DVL1,ULK1,ALS2,GRIA1,AGRN,CACNA1A,SYNGAP1                                                                                                                                                                                                                                                                                                                                                                                                                                                                                                                                                                                                                                                                                                                                                                                                                                                                                                                                                                                                                                           |
| GO:0006891             | 0.312598 | 0       | 0   | 22              | intra-Golgi vesicle-mediated transport                              | GOLGA5,COPB1,GABARAPL2,COPE,COPB2,NAPG,CUX1,COPZ1,COPG2,NAPA,STX16,OPTN,COG1,COG5,COG3,TOM1L2,GGA1,USO1,GOSR1,PACS1,COG2,GOLGA3                                                                                                                                                                                                                                                                                                                                                                                                                                                                                                                                                                                                                                                                                                                                                                                                                                                                                                                                                                                                                                                                                                                                        |
| GO:0051188             | 0.312343 | 0       | 0   | 216             | cofactor metabolic process                                          | POLR3H,PDHB,COQ7,BLVRA,HIBADH,GLO1,GSTK1,NFS1,SUCLA2,SUCLG1,MDH1,LDHB,GSR,MGST1,TPK1,GSTT2,MTHFD1,NFU1,GCLC,G6PDX,PPT1,FH1,GPX1,PIPOX,GPHN,MOCS2,COQ5,CPOX,UROS,HMOX2,ATP5G3,GPX4,PDXK,LIAS,FOLH1,IDH3B,ACOT5,DBIL5,NMNA2,DHFR,VNN1,ACO2,H6PD,CTNS,VKORC1,SCP2,DBI,SDHA,SUCLG2,PCCA,ACOT1,ALAD,SDHD,COQ6,SDHB,KYNU,DL,DL,MCEE,ACSS1,DLAT,INDO,MTHFD1L,OXSM,ALDH5A1,RNASEL,MDH1B,NFE2L1,PDSS2,UROD,NMNA1,ACSL6,HAGH,ISCA1,COX15,POLR2C,SDHC,NAPRT1,ACOT3,OXCT1,COQ9,IDH3A,RSAD1,IDH3G,IDH2,GBA2,MLYCD,PGD,GCK,ITGB1B,P3,NUDT7,TSPO,MTHFD2,GLYAT,GCLM,QPRT,EHHADH,GSTP1,GSTP2,CYB5R4,TXNRD3,MMAB,MOCS3,TALDO1,IRESB2,SOD1,HMOX1,ALDH1L1,GSTA3,TDO2,FECH,FOLR1,NADK,CBR2,3930401K13RIK,BC016495,GLRX2,PANK1,HMBS,DLST,ACOT9,PDHA1,NNAT,CS,MTHFS,ALAS1,MOCOS,TP11,ACOT2,HSD11B1,GPX3,0610012D14RIK,ADH4,COQ4,VKORC1L1,PANK2,FPGS,GSS,GCDH,SEC16A,GNMT,COQ3,HMGCL,VNN3,ISCA2,CYP1A2,ACACB,ACSS2,TST,HAO,MDH2,MOCS1,HEBP1,ACLY,PANK3,PDSS1,GGT7,KMO,GSTT3,ACMSD,PDK4,GSTA1,ALAS2,SLC27A3,RPIA,COASY,HNF4A,ALDH1L2,NADSYN1,NCF1,ACOT8,COQ2,ACSM4,AMBP,IDH1,CTH,HNF1A,NMNA3,NAMPT,ACOT12,OXCT2A,NCF2,MCCC1,PANK4,PDHA2,SHMT1,GPD1,C1QL2,ACO1,GIF,GSTT1,GGT1,PPOX,MTHFR,CES3,LDHA,PPCDC,2610209A20RIK,ISCU,COX10,MTHFSD,2610507B11RIK,FXN,NOX1,TKT,HMGCS1,ME1,HMGCR,FTCD,GGT5,P |
| GO:0008211             | 0.312164 | 0       | 0   | 39              | protein amino acid alkylation                                       | EZH2,BTG1,SUZ12,EED,PRMT1,METTL5,PRMT8,AI931714,4833442J19RIK,BHMT,LCMT1,LCMT2,PRMT5,SUV39H2,PAX5,PRMT3,RAB3B,PCMT1,PRDM9,ILF3,SUV39H1,MEN1,ICMT,SUV420H1,BTG2,PRMT7,PRMT2,RAB3D,RAB6,CARM1,EHMT1,NSD1,WHSC1L1,HEMK1,SUV420H2,MTR,SATB1,EHMT2,MLL1                                                                                                                                                                                                                                                                                                                                                                                                                                                                                                                                                                                                                                                                                                                                                                                                                                                                                                                                                                                                                     |
| GO:0006478             | 0.312164 | 0       | 0   | 39              | protein amino acid methylation                                      | EZH2,BTG1,SUZ12,EED,PRMT1,METTL5,PRMT8,AI931714,4833442J19RIK,BHMT,LCMT1,LCMT2,PRMT5,SUV39H2,PAX5,PRMT3,RAB3B,PCMT1,PRDM9,ILF3,SUV39H1,MEN1,ICMT,SUV420H1,BTG2,PRMT7,PRMT2,RAB3D,RAB6,CARM1,EHMT1,NSD1,WHSC1L1,HEMK1,SUV420H2,MTR,SATB1,EHMT2,MLL1                                                                                                                                                                                                                                                                                                                                                                                                                                                                                                                                                                                                                                                                                                                                                                                                                                                                                                                                                                                                                     |
| GO:0006900             | 0.30824  | 0       | 0   | 18              | membrane budding                                                    | COPB1,COPE,COPB2,PRKCI,COPG,ARCN1,HINT1,COPZ1,ARF1,P2RX7,CALY,AP2S1,PICALM,ARFGAP1,COPA,SNAP91,HIP1,GBF1                                                                                                                                                                                                                                                                                                                                                                                                                                                                                                                                                                                                                                                                                                                                                                                                                                                                                                                                                                                                                                                                                                                                                               |
| GO:0008654             | 0.306326 | 0       | 0   | 95              | phospholipid biosynthetic process                                   | PIGU,PIGH,IMPA1,PIGG,PCYT1A,FRAG1,PTDSS1,DPM1,CHPT1,PIGF,PIGA,AGPAT5,LYCAT,CEPT1,CDIPT,PGS1,HEXB,CD81,MBOAT5,PIGK,AGPAT9,FGF7,PHKA1,PI4K2A,PIK3C2A,SGMS2,PIGX,PIGV,PBX2,SERINC1,LPGAT1,GPAM,PIGQ,PIGL,AYTL1B,PIGW,ISYN,A1,D5WSU178E,DPM2,DOLK,SERINC5,ETNK1,AGPAT3,AGPAT1,PIGB,FABP5,PI4KB,SGMS1,PIGN,PLAUR,A530057A03RIK,PIGP,FABP3,PIP4K2C,CREBL1,LPCAT2,PEMT,PGAP1,FADS1,DPM3,PIGS,CRLS1,GAAA1,PIGY,AGPAT2,NOTCH4,SAMD8,PIGT,PLA2G4A,CDS2,LPCAT1,AGPAT4,C130090K23RIK,APOA1,PIGO,TAZ,PCYT2,PTDSS2,PDGFA,CHKA,PIGC,LCAT,PCYT1B,CDS1,SH3GLB1,PISD,SEMA6D,PIGM,BTNL7,PDGFB,PIGZ,DGKE,PI4KA,AGER,PERLD1                                                                                                                                                                                                                                                                                                                                                                                                                                                                                                                                                                                                                                                                 |
| GO:0046688             | 0.29825  | 0       | 0   | 16              | response to copper ion                                              | MT1,MT2,SOD3,NFKB1,ACADM,ALDOB,ATP7B,SORD,ATP5D,SOD1,BAX,PRNP,ATP7A,LCAT,TFRC,BCL2                                                                                                                                                                                                                                                                                                                                                                                                                                                                                                                                                                                                                                                                                                                                                                                                                                                                                                                                                                                                                                                                                                                                                                                     |
| GO:0006751             | 0.293409 | 0       | 0   | 252             | nucleoside phosphate metabolic process                              | ADK,PPAT,HIBADH,RDH14,GMPPR,DGUOK,ADSSL1,DERA,GUCY2F,ATP5L,GUK1,MDH1,LDHB,RRM2B,ADAL,CMPK2,PRPSAP2,MT,HFD1,NME3,DCK,ATP6V1F,NME7,NUDT15,G6PDX,ATP5G2,GUCY1B3,PDE8B,ADSL,FIGNL1,AK1,DHODH,GRM8,ATP5B,NT5E,ATP5G3,GUCY1A3,RBM3,PAPSS1,NDUFS1,ENPP5,ADORA2A,NMNA2,CNP,ATP6AP1,HPRT1,DHFR,ATPIF1,RP2H,NT5C2,H6PD,PTHLH,TBPL1,NME5,ATP6V0B,CTNS,ITPA,ENTPD3,DTYMK,GUCA1A,DRD1A,ATP6VOC,AMPD3,NME1,NUDT9,ATP5H,PTH,ADCY10,KYNU,ENTPD1,NT5C3,INDO,RORA,CMPK1,ATP5F1,ATP5A1,ADCY5,ADCY3,GMPS,NMNA1,ENTPD2,PRPS1,NPPA,GUCY2D,CNGB3,NME4,UMPS,ATP5J,ATP5G1,ATP2A1,CANT1,NAPRT1,ATP1A1,FHIT,ATP5O,PAICS,ATP5C1,CDA,TXNDC3,REXO2,GUCY1B2,OLA1,ATP5K,PGD,GCK,PRPS2,ITGB1B,P3,NUDT7,PNP1,GUCY2E,NUDT5,DECR2,ATP6V1B2,SLC25A13,RRM1,IMPDH2,QPRT,ATP5D,NT5M,NUDT1,UCN2,TALDO1,MUTYH,MPG,NUDT4,CLCA3,ATP5E,LDHD,ATP5J2,PRPS1L1,TDO2,TGFB1,RXFP2,GMPPR2,PDE8A,GART,NADK,CBR2,ATP6V1B1,ENTPD4,3930401K13RIK,BC016495,ERCC3,ENPP3,CTPS,GUCY2G,UPP2,ATP6V0D2,RP1H,APOE,TPIL1,TYMS,NPY2R,HSD11B1,EDN1,0610012D14RIK,PDE5A,ATIC,ABCA1,ARRB2,DRD5,CTPS2,SMARCAD1,TDG,ENTPD8,AIPL1,MYH7,HAAO,EDNRA,NME6,NT5C1A,NPR1,ATP6V1A,ACLY,ENPP1,NPPC,KMO,ADSS,CCNO,NME2,PDE4D,NT5C,ACMSD,ARRB1,AMPD1,THTPA,NT5C3L,RPIA,NT5C1B,ATP7A,DCTD,DUT,ND4L,NADSYN1,NCF1,TIMP2,PDZD3,MSH2,CACNB4,ADM,NMNA3,NAMF    |
| GO:0000184             | 0.289039 | 0       | 0   | 21              | nuclear-transcribed mRNA catabolic process, nonsense-mediated decay | PARN,DCPS,MAGOH,EIF4A3,SMG7,UPF2,RBM8A,SMG6,RNPS1,UPF3B,SMG5,UPF3A,EXOSC10,DCP1B,DCP1A,PAN3,USP52,GSP11,UPF1,DCP2,261020705RIK                                                                                                                                                                                                                                                                                                                                                                                                                                                                                                                                                                                                                                                                                                                                                                                                                                                                                                                                                                                                                                                                                                                                         |

**Table S3A. Gene sets up-regulated by severe stress plus morphine**

| Gene Ontology category | Score    | p-value | FDR | Gene set length | Gene_set_description                      | Gene_set_genes                                                                                                                                                                                                                                                                                                                                                                                                                                                                                                                                                                                                                                                           |
|------------------------|----------|---------|-----|-----------------|-------------------------------------------|--------------------------------------------------------------------------------------------------------------------------------------------------------------------------------------------------------------------------------------------------------------------------------------------------------------------------------------------------------------------------------------------------------------------------------------------------------------------------------------------------------------------------------------------------------------------------------------------------------------------------------------------------------------------------|
| GO:000704              | 0.288552 | 0       | 0   | 18              | lysosomal transport                       | CHMP5,M6PR,USE1,SNX1,ZFYVE16,ADRB2,LHCGR,VAMP7,AP3M1,LYST,RHOB,ARSB,NPC1,GNPTG,AP3B1,NAGPA,ALS2, SORT1                                                                                                                                                                                                                                                                                                                                                                                                                                                                                                                                                                   |
| GO:000649              | 0.28649  | 0       | 0   | 26              | protein amino acid O-linked glycosylation | POMGN1,GALNT1,DPM1,C1GALT1,GALNT2,GALNT13,ST8SIA6,POMT2,GCNT1,DPM2,GALNT10,POMT1,GALNT6,GYPC,GCNT3 ,GALNT7,DPM3,B3GNT6,A4GNT,GALNT9,TRAK2,TRAK1,OGT,GALNT3,POFUT1,LDLR                                                                                                                                                                                                                                                                                                                                                                                                                                                                                                   |
| GO:004636              | 0.286219 | 0       | 0   | 76              | monosaccharide catabolic process          | PDHB,FUT10,HIBADH,PGAM2,MDH1,LDHB,ENO3,FUT8,FUT9,OGDHL,G6PDX,PGAM1,BPGM,ENO2,PFKFB1,H6PD,GLB1,DLAT,E CD,UEVLD,ALDOC,LRRC16A,ALDOB,PGK2,FUT4,HIF1A,PGD,INS2,GCK,NUDT5,PFKM,TALDO1,OGDH,PKLR,TKTL1,3930401K13RI K,PGK1,ARNT,PDHA1,EG277333,TPI1,HSD11B1,HK2,LDHAL6B,6430537H07RIK,PKM2,LDHC,ADPGK,ALDOA,MDH2,GAPDH,ALD OART2,MIF,PFKL,IGF1,FUT1,RPIA,PFKP,ALDOART1,ENO1,PFKFB3,PDHA2,HKDC1,LDHA,BAD,GPI1,HK1,FUT7,FUT2,TKT,HK3,ML XIPL,PGLS,GAPDHS,INSR,DHTKD1                                                                                                                                                                                                             |
| GO:004427              | 0.282414 | 0       | 0   | 104             | cellular carbohydrate catabolic process   | PDHB,FUT10,HIBADH,PGAM2,MDH1,LDHB,ENO3,FUT8,FUT9,PYGL,OGDHL,CTBS,G6PDX,PGAM1,BPGM,FUCA1,ENO2,GAA,PFK FB1,CHID1,H6PD,GNS,GLB1,DLAT,ECD,UEVLD,ALDOC,GUSB,CHIA,CHI3L4,LRRC16A,HYAL1,ALDOB,PGK2,CHI3L1,HYAL4,FUT4,G NPDA1,HYAL2,GBA2,HIF1A,PGD,INS2,GCK,NUDT5,PFKM,TALDO1,OVGP1,IDUA,OGDH,PKLR,TKTL1,3930401K13RIK,PGK1,ARN T,PDHA1,EG277333,TPI1,HSD11B1,HK2,LDHAL6B,ADRA1B,LYVE1,6430537H07RIK,PKM2,LDHC,ADPGK,ALDOA,MDH2,PYGM,G APDH,ALDOART2,TREH,MIF,PFKL,IGF1,FUT1,RPIA,CHIT1,MGAM,PFKP,ALDOART1,ENO1,PFKFB3,PDHA2,HKDC1,LDHA,G6PC,BA D,GPI1,HK1,CHI3L3,FUT7,FUT2,TKT,HK3,MLXIPL,PYGB,PGLS,GAPDHS,AGL,AVPR1A,INSR,DHTKD1                                               |
| GO:001599              | 0.279222 | 0       | 0   | 71              | proton transport                          | SLC30A5,ATP6AP2,ATP5L,ATP6V1D,ATP6V1C1,ATP6V1F,ATP6V1H,ATP5G2,ATP6V0E2,ATP6V1E1,ATP5B,ATP5G3,ATP6V0E,AT P6V0D1,ATP6AP1,ATP6V0B,ATP6V0C,ATP5H,ATP5F1,ATP5A1,ATP5J,ATP5G1,ATP2A1,ATP1A1,ATP5O,ATP5C1,ATP6V1G2,ATP 5K,ATP6V1B2,ATP6V1C2,ATP5D,ATP1A4,ATP6V0A4,ATP5S,CLCA3,ATP5E,ATP5J2,ATP6V1B1,ATP6V0D2,SLC36A2,NNT,SLC9A5, ATP6V0A2,ATP12A,ATP6V1G1,ATP2C1,UCP2,UCP3,ATP2C2,ATP6V1A,NHEDC2,SLC4A11,HVCN1,ATP6,ATP13A2,ND4L,ATP4A,A TP1B4,ATP1A2,ATP2A2,UCP1,ATP6V1E2,ATP6V0A1,ATP6V1G3,NOX1,ATP2A3,TCIRG1,ATP4B,SLC36A1,MON2,ATP1A3                                                                                                                                       |
| GO:004303              | 0.271904 | 0       | 0   | 76              | tRNA aminoacylation                       | FARS2,TARSL2,NARS2,LARS2,AARSD1,SCYE1,POU5F1,TARS,DARS,AIF1,YARS2,RARS2,PTPLB,DAXX,SLC22A17,DDR1,PARS2,DLA T,LARS,QARS,PLXNB2,DARS2,POLG2,RARS,ZMAT2,B3GALT4,KARS,WDR92,NARS,ATP6V1G2,EIF2AK4,HARS,WDR46,SARS2,FAR SB,TCF19,GARS,SARS,YARS,WARS,HARS2,TARS2,MARS,D630004A14RIK,AAARS,EAARS2,ARID2,IARS2,PHF1,WARS2,DALRD3,VARS ,TAPBP,GTTF2H4,MARS2,4833403115RIK,EPRS,LST1,KHSRP,CARS2,LTB,AARS2,VARS2,IARS,HMG20B,DND1,CARS,ASTN1,FARSA, CREG2,ZNFX1,COL11A2,TPR,ZBTB9,TUBGCP6,SYNGAP1                                                                                                                                                                                 |
| GO:000865              | 0.270546 | 0       | 0   | 51              | amino acid biosynthetic process           | PSPH,SEPHS2,ASNS,PSAT1,ADI1,MTHFD1,MTRR,CDO1,ASNSD1,MAT2B,ASL,GOT1,DHFR,AK3,PRODH2,BHMT2,GOT2,BHMT,AL DH18A1,UPB1,BCAT1,MAT2A,SARDH,PYCR2,AGXT,PRODH,PHGDH,PYCRL,0610012D14RIK,PYCR1,SIRT7,4933437F05RIK,THNS L2,GLULD1,PLOD1,OTC,GLUL,CTH,BCAT2,NAGS,MTHFR,ALDH4A1,MAT1A,TOR3A,TAS1R2,CBS,PAH,ENOPH1,CORO2A,THNSL1, MTR                                                                                                                                                                                                                                                                                                                                                 |
| GO:004362              | 0.270529 | 0       | 0   | 84              | cellular protein complex assembly         | GRIK2,ARL2,CHRNA3,PICK1,NDUFS5,TMEM48,TFAM,PDGFC,SCO1,FKBP4,PSMG2,MIS12,NDUFS4,RANBP17,TCP1,NDUFS7,MU SK,MBD2,PSMG1,ATPAF2,CLEC2I,SMAD3,COX15,PEX13,IPO13,IPO7,ELP2,ADRB2,CDK5,NDUFS8,ADRM1,PAK1,NCK1,IPO11,CO X11,TBCA,COX18,XPO7,DOK7,PRLR,SURF1,SRC,SMAD4,TBCE,CENPF,TGFBF1,XPO6,CSE1L,EID2,ZFYVE9,TGFBF3,CENPE,NUBP1, XPO1,LRP4,FMOD,TAPBP,CD3E,DLG2,NCK2,GRIK5,ANLN,TAZ,PTK2,LONP1,NUP205,MAPK8IP2,TNPO1,IPO9,PTK2B,NUP98,CO X10,IPO4,MLH1,DVL1,TNPO2,KPNB1,IPO8,UNC13B,IPO5,PXN,AGRN,CACNA1A,SYNGAP1                                                                                                                                                               |
| GO:001605              | 0.248554 | 0       | 0   | 111             | carbohydrate catabolic process            | PDHB,FUT10,HIBADH,PGAM2,MDH1,LDHB,ENO3,FUT8,FUT9,PYGL,OGDHL,CTBS,G6PDX,PGAM1,BPGM,FUCA1,ENO2,GAA,PFK FB1,CHID1,H6PD,GNS,GLB1,DLAT,ECD,UEVLD,ALDOC,KHK,GUSB,CHIA,CHI3L4,LRRC16A,HYAL1,ALDOB,PGK2,CHI3L1,HYAL4,FU T4,GNPDA1,HYAL2,GBA2,HIF1A,PGD,INS2,GCK,NUDT5,SPACA3,PFKM,TALDO1,OVGP1,IDUA,OGDH,PKLR,TKTL1,3930401K13RI K,PGK1,ARNT,PDHA1,EG277333,LYG1,TPI1,PGLYRP3,HSD11B1,HK2,LDHAL6B,ADRA1B,LYVE1,6430537H07RIK,PKM2,LDHC,AD PGK,ALDOA,MDH2,PYGM,GAPDH,ALDOART2,TREH,MIF,PFKL,IGF1,FUT1,RPIA,CHIT1,PGLYRP4,MGAM,PFKP,ALDOART1,ENO1, PFKFB3,PGLYRP1,PDHA2,HKDC1,LDHA,G6PC,BAD,GPI1,HK1,CHI3L3,LYG2,FUT7,FUT2,TKT,HK3,MLXIPL,PYGB,PGLS,GAPDHS,AG L,AVPR1A,INSR,DHTKD1 |
| GO:003016              | 0.246876 | 0       | 0   | 36              | regulation of proteolysis                 | IFT52,GCLC,SERPINE2,RAB23,CLN3,CLN8,STUB1,DNAJC1,AURKAIP1,TIMP3,CFH,SERPINB7,CR1L,INS2,SERPINE1,SPINK5,SPINK1 2,KNG1,CLN6,PIK3R1,APOE,PLAUR,TIMP1,SERPINA5,SERPINB13,IFT88,SHH,CD46,TIMP2,CD59B,SERPINB10,AKT1,IDE,WFIKKN 1,LTBP4,EP300                                                                                                                                                                                                                                                                                                                                                                                                                                  |

**Table S3A. Gene sets up-regulated by severe stress plus morphine**

| Gene Ontology category | Score    | p-value | FDR | Gene set length | Gene_set_description                    | Gene_set_genes                                                                                                                                                                                                                                                                                                                                                                                                                                                                                                                                                                                                                                                                                                                                                                                                                                                                                                                                                                                                                                                                                                                                                                            |
|------------------------|----------|---------|-----|-----------------|-----------------------------------------|-------------------------------------------------------------------------------------------------------------------------------------------------------------------------------------------------------------------------------------------------------------------------------------------------------------------------------------------------------------------------------------------------------------------------------------------------------------------------------------------------------------------------------------------------------------------------------------------------------------------------------------------------------------------------------------------------------------------------------------------------------------------------------------------------------------------------------------------------------------------------------------------------------------------------------------------------------------------------------------------------------------------------------------------------------------------------------------------------------------------------------------------------------------------------------------------|
| GO:0006488             | 0.237813 | 0       | 0   | 140             | protein amino acid glycosylation        | ALG5,FUT10,DPAGT1,COG7,ALG8,ST3GAL4,POMGNT1,B3GALT5,FUT8,GALNT1,TUSC3,DPM1,C1GALT1,FUT9,PSEN1,DDOST,POU5F1,GALNT2,AIF1,GALNT13,MGAT1,ALG1,DAD1,B3GALT6,KRTCAP2,ST8SIA4,ST8SIA6,DAXX,DDR1,ST8SIA3,TSPAN8,MPDU1,B3GNT2,MGAT4A,POMT2,ST6GAL1,ST6GAL2,RPN2,MAN1B1,CD37,B3GALT4,GCNT1,TM4SF5,LRP2,STT3A,B3GALT1,MAGT1,MAN1C1,B3GALNT1,TM4SF4,DPM2,FUT4,ATP6V1G2,ALG3,EDEM2,WDR46,GALNT10,MGAT3,ALG6,POMT1,LIPA,MGAT4B,TCF19,SDF2,RPN1,B4GALT1,IL17A,GANAB,ST6GALNAC2,GALNT6,DOLPP1,GYPC,ST3GAL3,PRKCSH,GAL3ST1,TSPAN7,KEL,MAN2A1,GCNT3,COG3,PMM2,GALNT7,B3GALNT2,UGCGL1,ST6GALNAC6,PHF1,ST3GAL6,DPM3,B3GNT6,ST6GALNAC1,ALK,TAPBP,ABO,MGAT2,GTF2H4,LIPC,MAN1A2,LST1,B4GALNT2,STT3B,A4GNT,FUT1,ALG12,ST3GAL5,MGAT5,B3GNT8,LTB,B3GNT4,GCS1,GNPTG,FUT11,B3GNT7,ST3GAL2,ST8SIA1,ALG2,LARGE,ST6GALNAC3,COG2,ST6GALNAC4,ST8SIA5,FUT7,GALNT9,FUT2,TRAK2,TRAK1,B3GNT5,OGT,B3GALT2,UGCGL2,GALNT3,ST8SIA2,SEC1,COL11A2,ST6GALNAC5,B3GNT3,ST3GAL1,POFUT1,ZBTB9,LDLR,SYNGAP1                                                                                                                                                                                                                                |
| GO:0046488             | 0.235553 | 0       | 0   | 21              | phosphatidylinositol metabolic process  | PIP4K2A,IMPA1,PTPMT1,CDIPT,CD81,PI4K2A,PIK3C2A,PITPNC1,PIP5K1A,PI4KB,PIP4K2C,PIP5KL1,PDGFA,PIP5K1B,PIP4K2B,IHK3,PIP5K3,PDGFB,PIP5K1C,GALR2,PI4KA                                                                                                                                                                                                                                                                                                                                                                                                                                                                                                                                                                                                                                                                                                                                                                                                                                                                                                                                                                                                                                          |
| GO:000640              | 0.23555  | 0       | 0   | 50              | RNA catabolic process                   | EXOSC7,LSM2,AUH,PARN,DCPS,MAGOH,EIF4A3,XRN2,RNASEH2A,LSM7,LSM6,SMG7,RNASE6,RNH1,UPF2,RBM8A,SMG6,LSM5,RNPS1,PNPT1,UPF3B,SMG5,ZFP36L1,UPF3A,EXOSC10,ABCE1,DCP1B,MEX3D,ZFP36,PPP1R8,POP1,DEDD2,DCP1A,HNRNP,DOAS2,PAN3,ZHX2,ERN2,USP52,GSPT1,RNASEH1,MLH1,UPF1,ZFP36L2,PABPC4,HSPA1B,ISG20,DCP2,ZFP36L3,Z610207105RIK                                                                                                                                                                                                                                                                                                                                                                                                                                                                                                                                                                                                                                                                                                                                                                                                                                                                         |
| GO:000910              | 0.234476 | 0       | 0   | 151             | glycoprotein biosynthetic process       | ALG5,FUT10,DPAGT1,COG7,ALG8,ST3GAL4,POMGNT1,B3GALT5,FUT8,GALNT1,TUSC3,DPM1,C1GALT1,FUT9,PSEN1,DDOST,POU5F1,GALNT2,BACE2,AIF1,GALNT13,MGAT1,ALG1,DAD1,B3GALT6,KRTCAP2,PAWR,ST8SIA4,ST8SIA6,DAXX,DDR1,HBEGF,ST8SIA3,TSPAN8,MPDU1,B3GNT2,MGAT4A,POMT2,AATF,ST6GAL1,ST6GAL2,RPN2,MAN1B1,CD37,B3GALT4,GCNT1,TM4SF5,LRP2,STT3A,B3GALT1,MAGT1,MAN1C1,B3GALNT1,TM4SF4,DPM2,FUT4,TNIP1,ATP6V1G2,ALG3,EDEM2,GAL3ST4,WDR46,GALNT10,MGAT3,ALG6,POMT1,LIPA,MGAT4B,TCF19,SDF2,RPN1,B4GALT1,IL17A,GANAB,ST6GALNAC2,GALNT6,DOLPP1,GYPC,ST3GAL3,PRKCSH,GAL3ST1,TSPAN7,FKRP,KEL,MAN2A1,GCNT3,COG3,PMM2,GALNT7,B3GALNT2,UGCGL1,ST6GALNAC6,PHF1,ST3GAL6,DPM3,B3GNT6,ST6GALNAC1,ALK,TAPBP,ABO,MGAT2,GTF2H4,LIPC,MAN1A2,LST1,B4GALNT2,STT3B,A4GNT,FUT1,ALG12,ST3GAL5,MGAT5,ATP7A,B3GNT8,LTB,B3GNT4,GCS1,GNPTG,FUT11,B3GNT7,ST3GAL2,ST8SIA1,ALG2,NECAB3,LARGE,ST6GALNAC3,COG2,PHLDA1,ST6GALNAC4,ST8SIA5,FUT7,GALNT9,FUT2,TRAK2,TRAK1,B3GNT5,OGT,B3GALT2,BCL2,UGCGL2,GALNT3,ST8SIA2,SEC1,COL11A2,ST6GALNAC5,B3GNT3,ST3GAL1,POFUT1,ZBTB9,LDLR,SYNGAP1                                                                                                                                                              |
| GO:000915              | 0.232511 | 0       | 0   | 21              | purine ribonucleotide catabolic process | ATP5B,AMPD3,NUDT9,ENTPD1,ATP5A1,ENTPD2,ATP2A1,ATP1A1,ATP50,ATP5C1,OLA1,ATP5D,ATP5E,GMPR2,ERCC3,MYH7,ACL1,ATP1A2,ABCC6,MYH6,MYO9B                                                                                                                                                                                                                                                                                                                                                                                                                                                                                                                                                                                                                                                                                                                                                                                                                                                                                                                                                                                                                                                          |
| GO:004616              | 0.231645 | 0       | 0   | 82              | alcohol catabolic process               | PDHB,FUT10,HIBADH,PGAM2,MDH1,LDHB,ENO3,FUT8,FUT9,OGDHL,G6PDX,PGAM1,BPGM,ENO2,PFKFB1,H6PD,GLB1,DLAT,ECDC,UEVLD,ALDOC,MIOX,LRRC16A,ALDOB,PGK2,FUT4,HIF1A,PGD,INS2,GCK,NUDT5,PFKM,TALDO1,OGDH,PKLR,TKTL1,3930401K13RIK,PGK1,ARNT,PDHA1,EG277333,TP11,HSD11B1,HK2,LDHAL6B,ADH4,6430537H07RIK,PKM2,LDHC,ADPGK,ALDOA,MDH2,GAPDH,ALDOART2,GPD1L,MIF,PFKL,IGF1,FUT1,RPIA,ADH1,PFKP,ALDOART1,ENO1,PFKFB3,PDHA2,GPD1,ADH7,HKDC1,LDHA,BAD,GPI1,HK1,FUT7,FUT2,TKT,HK3,MLXIPL,PGLS,GAPDHS,INSR,DHTKD1                                                                                                                                                                                                                                                                                                                                                                                                                                                                                                                                                                                                                                                                                                  |
| GO:000652              | 0.230913 | 0       | 0   | 273             | amino acid metabolic process            | ADC,HIBCH,PPAT,HIBADH,FARS2,DUS4L,GAD1,NFS1,AUH,TARSL2,NARS2,PSPH,PCBD1,6530401N04RIK,SEPHS2,HDC,ASNS,LARS2,AARSD1,PSAT1,ADI1,SCYE1,GSTZ1,MTHFD1,GAD2,MOXD1,BCKDHB,DDO,GCLC,POU5F1,TARS,DTD1,DARS,MTRR,GOT1L1,SHMT2,CDO1,GGH,AIF1,YARS2,ASNSD1,ARG2,PTS,CLN3,MAT2B,ASL,MCCC2,RARS2,QDPR,GOT1,DHFR,PTPLB,SLU7,HPD,CTNS,STRR,AK3,DAXX,AHXY,PRODH2,BHMT2,SLC22A17,PCCA,DDR1,BCKDHA,ASRGL1,GOT2,PARS2,KYNU,DLAT,INDO,BHMT,LARS,ALDH5A1,QARS,PLXNB2,DARS2,ALDH18A1,SLC7A4,GMPS,POLG2,RARS,HNRPLL,GCSH,TH2MAT2,GFPT2,B3GALT4,ACAD8,GLS2,PCCB,KARS,SLC7A2,ALDH6A1,UPB1,WDR92,COMT,BCAT1,NARS,ATP6V1G2,EIF2AK4,HARS,TYRP1,DDAH1,PEPD,SLC25A15,INDOL1,WDR46,MAT2A,SARS2,INS2,TYR,SARDH,FARSB,AASS,TCF19,ASPA,GCLM,GARS,DDT,GFPT1,PADI2,SARS,DBH,YARS,SLC7A9,PYCR2,WARS,HARS2,AGXT,TDO2,AADAT,3930401K13RIK,CTPS,PRODH,4930402E16RIK,SMS,TARS2,PHGDH,MARS,TPH1,PYCR1,SLC45A2,BCKDK,PADI4,SLC7A7,PDZD2,D630004A14RIK,AARS,OAT,0610012D14RIK,DDAH2,EARS2,FRRS1,SLC6A14,GCH1,ARID2,FPGS,PYCR1,GSS,SLC6A6,SIRT7,IARS2,CTPS2,PADI1,PHF1,4933437F05RIK,HPDL,SI,DCT,DMGDH,ACY1,WARS2,DALRD3,VARS,TAPBP,GTF2H4,MARS2,KMO,4833403115RIK,EPRS,LST1,ARG1,SLC3A1,KHSRP,ATG7,THNSL2,ACMSD,CARS2,GLULD1,PLOD1,BAA |
| GO:003355              | 0.227473 | 0       | 0   | 51              | cellular response to stress             | ASNS,EIF2AK3,PSEN1,CLN3,ATG16L1,EIF2B1,EIF2B3,EIF2B4,KRT20,ATG4C,PPP1R15B,ATG5,EIF2S1,ATG4D,WFS1,ATG12,ATG4B,EIF2B5,SREBF1,CTSD,EIF2AK4,HIF1A,INS2,BECN1,PCSK9,ALB,CARTPT,HMOX1,TRP53,MAP1LC3A,HFE,GLRX2,ARNT,ATG10,HSPA5,ATG9A,FADS1,NPC1,ANGPTL4,PRKCD,JUN,ATG4A,DDIT3,HRK,NUAK2,FOXA3,FRAP1,ATG9B,AVPR1A,EPAS1,GSK3B                                                                                                                                                                                                                                                                                                                                                                                                                                                                                                                                                                                                                                                                                                                                                                                                                                                                   |



**Table S3A. Gene sets up-regulated by severe stress plus morphine**

| Gene Ontology category | Score    | p-value | FDR | Gene set length | Gene_set_description                              | Gene_set_genes                                                                                                                                                                                                                                                                                                                                                                                                                                                                                                                                                                                                                                                                                                                                                                                                                                                                                                                                                                                                                                                                                                                                                                                                         |
|------------------------|----------|---------|-----|-----------------|---------------------------------------------------|------------------------------------------------------------------------------------------------------------------------------------------------------------------------------------------------------------------------------------------------------------------------------------------------------------------------------------------------------------------------------------------------------------------------------------------------------------------------------------------------------------------------------------------------------------------------------------------------------------------------------------------------------------------------------------------------------------------------------------------------------------------------------------------------------------------------------------------------------------------------------------------------------------------------------------------------------------------------------------------------------------------------------------------------------------------------------------------------------------------------------------------------------------------------------------------------------------------------|
| GO:000600              | 0.221834 | 0       | 0   | 67              | glucose catabolic process                         | PDHB,HIBADH,PGAM2,MDH1,LDHB,ENO3,OGDHL,G6PDX,PGAM1,BPGM,ENO2,PFKFB1,H6PD,DLAT,ECD,UEVLD,ALDOC,LRR16A,ALDOB,PGK2,HIF1A,PGD,INS2,GCK,PFKM,TALDO1,OGDH,PKLR,TKTL1,3930401K13RIK,PGK1,ARNT,PDHA1,E6277333,TP11,HSD11B1,HK2,LDHAL6B,6430537H07RIK,PKM2,LDHC,ADPGK,ALDOA,MDH2,GAPDH,ALDOART2,MIF,PFKL,IGF1,RPIA,PFKP,ALDOART1,ENO1,PFKFB3,PDHA2,HKDC1,LDHA,BAD,GPI1,HK1,TKT,HK3,MLXIPL,PGLS,GAPDHS,INSR,DHTKD1                                                                                                                                                                                                                                                                                                                                                                                                                                                                                                                                                                                                                                                                                                                                                                                                               |
| GO:004646              | 0.214493 | 0       | 0   | 122             | membrane lipid biosynthetic process               | PIGU,PIGH,IMPA1,PIGG,PCYT1A,FRAG1,PTDSS1,DPM1,CHPT1,PIGF,PIGA,AGPAT5,LYCAT,CEPT1,CDIPT,PGS1,HEXB,CD81,MBOA,T5,UGT8A,PIGK,AGPAT9,CLN8,FGF7,PHKA1,SMPD1,PI4K2A,ST8SIA6,PIK3C2A,SGMS2,UGCG,PIGX,ST8SIA3,PIGV,PBX2,SERINC1,LPGAT1,A4GALT,GPAM,PIGQ,PIGL,AYT1B,PIGW,ISYNA1,D5WSU178E,DPM2,DOLK,LASS5,SERINC5,LASS2,ETNK1,AGPAT3,AGPAT1,LASS3,PIGB,FABP5,PI4KB,SGMS1,PIGN,GAL3ST1,PLAUR,A530057A03RIK,PRKAA1,PIGP,FABP3,PIP4K2C,CREBL1,LPCAT2,PEMT,PGAP1,ST6GALNAC6,SMPD2,FADS1,DPM3,PIGS,CRLS1,ST6GALNAC1,GPA1,PIGY,AGPAT2,NOTCH4,SAMD8,PIGT,PLA2G4A,CDS2,SPHK2,LPCAT1,AGPAT4,C130090K23RIK,APOA1,ST3GAL5,PIGO,TAZ,PCYT2,PTDSS2,A3GALT2,PDGFA,CHKA,PIGC,LPCAT,PCYT1B,CDS1,ST8SIA1,SH3GLB1,PISD,SEMA6D,LARGE,LASS6,PIGM,BTNL7,LASS4,ST8SIA5,B4GALNT1,B3GNT5,PDGFB,GBGT1,PIGZ,DGKE,PI4KA,AGER,B4GALT6,PERLD1                                                                                                                                                                                                                                                                                                                                                                                                                  |
| GO:000690              | 0.211713 | 0       | 0   | 24              | vesicle targeting                                 | PSEN1,COPB1,COPE,COPB2,TMED2,COPG,ARCN1,AP1M2,LRMP,TMED10,COPZ1,ARF1,YKT6,WIPI1,SNAP29,EXOC4,ARFGAP1,COPA,NLGN1,SNAP23,SEPT5,MAP4K2,GBF1,PCLO                                                                                                                                                                                                                                                                                                                                                                                                                                                                                                                                                                                                                                                                                                                                                                                                                                                                                                                                                                                                                                                                          |
| GO:000691              | 0.20343  | 0       | 0   | 34              | autophagy                                         | PSEN1,ATG3,CLN3,GABARAPL2,ATG16L1,ATG4C,GOPC,ATG5,ARSA,ATG4D,ATG12,LAMP1,ATG4B,CTSD,RAB24,MAP1LC3B,BECN1,1200002N14RIK,MAP1LC3A,ATG10,WIPI1,ARSB,ATG9A,NPC1,TMEM166,ATG7,ATG16L2,RGS19,ATG4A,ULK1,AMBRA1,FRAP1,ATG9B,IRGM                                                                                                                                                                                                                                                                                                                                                                                                                                                                                                                                                                                                                                                                                                                                                                                                                                                                                                                                                                                              |
| GO:001060              | 0.202909 | 0       | 0   | 184             | posttranscriptional regulation of gene expression | PAIP2,COG7,ETF1,SRP9,1110005A23RIK,F2R,MAPK3,EIF4E,EIF2AK3,4930503E24RIK,SERBP1,RPS18,EIF4H,EIF1,CDK4,APOA2,MTRR,NANOS1,EIF3H,FBXO7,ANG3,EIF4B,EIF4A3,HRSP12,RBM3,IMPACT,CALCR,DAZL,SRP14,NGDN,SECISBP2,ANG,EIF2B1,EIF2B3,PPP1CA,EIF2B4,DNAJC1,NAPG,EIF3D,EIF3J,HBEGF,SEPSECS,PAIP1,MTIF3,PPP1R15B,PPARGC1A,EIF2S1,EIF3F,IGF2BP2,FMR1,MTIF2,HSPB1,EIF5B,DDX25,APTX,RHOA,EIF4E2,DDX1,MORC3,EIF3K,EIF2B5,EIF5,EEFSEC,MIF4G4,MAPK1,PTGFRN,SCAP,BOLL,EIF2B2,IL6,EIF2AK4,STX12,DGCR8,NCK1,PA2G4,EIF4A2,PUM2,EIF2A,ZFP36L1,EIF1B,TRSPAP1,GTPBP4,EIF3I,MTPN,EIF3C,EIF3G,MYD116,IREB2,TBRG1,TRMT6,PRKRIR,TIA1,APLP1,ELAVL1,QQ,TGFB1,EIF5A,MVK,MKNK1,SAMD4,PRG3,EIF4EBP1,ADAD1,PRKAA1,EIF3E,BZW1,MEX3D,ZFP36,PAIP2B,METAP1,BARHL2,AURKA,COG3,GATC,BZW2,CUGBP1,MTRF1,TNFRSF1B,APP,NDUF A13,IGF2BP1,EIF4EBP3,PABPC1,CDKN2A,NANOS2,APBB1,NCK2,EIF4G2,CPN2,HPS4,TSC1,HNRNPD,IGF1,F2,PEX6,EIF4EBP2,APOA1,MDM4,UCN,CD28,EIF2AK1,ISOC2B,PTEN,MKNK2,KRT7,PSTK,CPEB1,DIO2,ACO1,BCL3,MAPKAPK2,IGF2BP3,EIF4E3,IPO9,PTK2B,PUM1,A1CF,PRKCD,TNF,SND1,DICER1,CCDC88C,NCKAP1,EIF4G1,PDGFRB,UPF1,ZFP36L2,AKT1,BCL2,PRKDC,EIF2C1,CPEB2,APBB2,KRT17,BRF1,RBM38,PRKCA,NANOS3,APOBEC1,GCN1L1,ATXN2,VEGFA,EIF4G3,YBX2                                 |
| GO:003244              | 0.20069  | 0       | 0   | 113             | protein modification by small protein conjugation | NSMCE2,FBXO25,UBA3,SUZ12,RBX1,TSG101,FBXO32,GCLC,ATG3,FBXO3,SUMO1,SMURF1,SUMO3,FBXL21,MAP3K1,RNF217,SAE1,RBBP6,FBXL3,UBE2C,NEDD8,VHLH,STUB1,RNF2,PPIL2,UBE2V2,UBE2V1,ATG5,CUL5,RPS27A,BMI1,DZIP3,TRIM23,UBE2G1,UHRF2,SUMF1,CHFR,CDK5,SUMO2,KCMF1,MUL1,RFLL,PIAS3,FGFR3,ANAPC11,PIAS2,LNX1,SENP7,PARK2,FBXW11,GTPBP4,RNF144B,ERCC8,UBOX5,AMFR,HERC5,ATG10,BCL10,PCNP,WDSUB1,UBB,FBXO4,FBXL5,UBE2N,PRPF19,RNF11,FBXO11,CBX8,LRRK2,SIAH2,UBQLN1,NAE1,UBE3C,MGRN1,TSPAN17,PIAS4,BRCA1,VCP,RNF139,ATG7,DDB2,MIB2,TSC1,UBE2D1,CAND1,TRAF6,HDAC6,FBXO9,FBXW7,FBXO24,BARD1,WWP1,NHLRC1,GSPT1,RING1,NOSIP,SIAH1A,FBXO10,UBE4A,MDM2,LMO7,TRAF7,AKT1,RAB26,TRIP12,SOC57,BCL2,MYLIP,NEDD4L,UBE4B,CBL,HUWE1,BIRC6                                                                                                                                                                                                                                                                                                                                                                                                                                                                                                                   |
| GO:005102              | 0.193405 | 0       | 0   | 72              | mRNA transport                                    | NXT2,TMEM48,DDX19A,MAGOH,NUP43,NUP50,DDX39,RANBP17,MAGOH,NUPL2,SMG7,THOC3,NUP107,HNRNPA1,NUP37,NCBP2,FMR1,UPF2,DDX25,NUP35,G3BP2,RBM8A,THOC4,SMG6,NUP85,NUP153,UPF3B,SMG5,THOC1,NUP88,NUP62,XPO7,UPF3A,NUP133,FUSIP1,GLE1,NXF2,NUP54,NXF3,QK,EIF5A,THOC2,SEH1L,BAT1A,DDX19B,RAE1,NUP155,XPO1,NUPL1,NUP188,NUP210,LRRPRC,NXT1,SENP2,KHSRP,NUP205,MVP,NUP93,REFBP2,RANBP2,NXF1,NUP98,NUP160,TNKS,CASC3,HHEX,UPF1,HRB,NUP214,POM121,TPR,HUWE1                                                                                                                                                                                                                                                                                                                                                                                                                                                                                                                                                                                                                                                                                                                                                                             |
| GO:003132              | 0.180377 | 0       | 0   | 207             | regulation of cellular biosynthetic process       | PAIP2,AGT,ETF1,SRP9,1110005A23RIK,F2R,MAPK3,EIF4E,EIF2AK3,4930503E24RIK,RPS18,EIF4H,EIF1,CDK4,NANOS1,EIF3H,ARPP19,GRM8,ANG3,GLA,EIF4B,EIF4A3,ARG2,HRSP12,GUCY1A3,IMPACT,DAZL,SRP14,NGDN,SECISBP2,ANG,EIF2B1,EIF2B3,PTHLH,PPP1CA,EGFR,EIF2B4,DNAJC1,EIF3D,EIF3J,HBEGF,GUCA1A,DRD1A,PTH,SEPSECS,PAIP1,MTIF3,PPP1R15B,PPARGC1A,EIF2S1,EIF3F,IGF2BP2,NR3C1,HRH1,FMR1,MTIF2,HSPB1,EIF5B,DDX25,BMP6,RHOA,EIF4E2,DDX1,EIF3K,EIF2B5,EIF5,EEFSEC,MIF4G4,MAPK1,ATP1A1,PTGFRN,LHCGR,SCAP,BOLL,IL10,EIF2B2,IL6,EIF2AK4,DDAH1,NCK1,PA2G4,HIF1A,GCK,EIF4A2,PUM2,EIF2A,ZFP36L1,ITGB2,EIF1B,TRSPAP1,EIF3I,GFPT1,MTPN,EIF3C,AOF2,EIF3G,MYD116,IREB2,TRMT6,LEP,PRKRIR,TIA1,APLP1,PTX3,ADIPOQ,QK,TGFB1,RXFP2,EIF5A,MVK,MKNK1,SAMD4,DYNLL1,ARNT,PRG3,APOE,EIF4EBP1,ADAD1,PRKAA1,EIF3E,BZW1,NPY2R,PAIP2B,GCHFR,METAP1,EDN1,BARHL2,ABCA1,GATC,BZW2,ARRB2,MTRF1,DRD5,EDNRA,NPR1,HSP90AA1,APP,BRCA1,NDUFA13,EINPP1,NPPC,IGF2BP1,PLA2G4A,EIF4EBP3,NANOS2,NCK2,EIF4G2,ARRB1,JAK2,TSC1,IGF1,F2,EIF4EBP2,CAV1,POU1F1,HNF4A,UCN,CD28,NOD2,EIF2AK1,C1QTNF2,MKNK2,PDZD3,KRT7,PSTK,CPEB1,DIO2,AGTR2,KLRK1,ACO1,BCL3,APOA5,IGF2BP3,EIF4E3,PTK2B,PUM1,TICAM1,TNF,TRERF1,RLN3,EIF4G1,PDGFRB,UPF1,AKT1,AVP,HSP90AB1,STK11,MLXIPL,EIF2C1,CPEB2,P2RX4,DYRK2, |

**Table S3A. Gene sets up-regulated by severe stress plus morphine**

| Gene Ontology category | Score    | p-value | FDR | Gene set length | Gene_set_description                      | Gene_set_genes                                                                                                                                                                                                                                                                                                                                                                                                                                                                                                                                                                                                                                                                                                                                                                                                                                                                                                                                                                                                                                                                                                                                                                                                                     |
|------------------------|----------|---------|-----|-----------------|-------------------------------------------|------------------------------------------------------------------------------------------------------------------------------------------------------------------------------------------------------------------------------------------------------------------------------------------------------------------------------------------------------------------------------------------------------------------------------------------------------------------------------------------------------------------------------------------------------------------------------------------------------------------------------------------------------------------------------------------------------------------------------------------------------------------------------------------------------------------------------------------------------------------------------------------------------------------------------------------------------------------------------------------------------------------------------------------------------------------------------------------------------------------------------------------------------------------------------------------------------------------------------------|
| GO:0043088             | 0.174964 | 0       | 0   | 197             | negative regulation of catalytic activity | XIAP,PSMB5,BUB3,GPS1,PSMD10,PSMB2,HRH3,LEPROT,PSMA6,GRM4,PSEN1,RGS4,GPX1,PPP2CA,APOA2,CDKN1A,GRM8,PSMA2,CDC23,GLA,ARG2,HERPUD1,PSMF1,PTPRC,CLN3,PSMD12,PTMA,CLN8,GALR1,UBE2C,PSMA5,PRKRIP1,HBXIP,ADORA2A,ATPIF1,PSMB4,PSMC2,PSMD9,PSMA3,PRKCZ,PPP2R4,PSMB6,DRD1A,PKIG,PSMD13,PSMD5,DUSP16,FBXO5,PSMC6,PSMA4,PSMB7,PSMC4,PSMB1,PSMC5,HEXIM2,PSME2,PSMA1,HEXIM1,PSME1,PSMD14,HSPA1A,PDCC4,PSMD8,SPRED1,EDNRB,GNAI3,PSMB3,FABP4,CDC26,UBE2E1,ANAPC11,ANAPC7,INS2,PSMD6,MAD2L1,OAS1D,SNX6,GADD45G,NUP62,PSMD11,TNNT2,TARB2,PCSK9,PAK2,DUSP22,PSMD4,P2RY12,GRM7,PSMD7,DNAJB6,KNG1,SIRT1,ANGPTL3,MEN1,LAX1,PSMA7,PSMC3,NOS1,TNNI3,CDC20,ANAPC2,PSMB9,ANAPC10,APOE,CDC16,UBB,LATS1,DUSP2,CASP3,PSMC1,PKIA,GCHFR,CDKN1B,GALR3,PSMD1,MBIP,ANAPC4,BUB1B,GABBR1,DRD5,HIPK3,ADRA2A,ANAPC5,PSMB8,PKIB,GNAI2,CAV3,CAST,PSMD3,GRM3,CFLAR,ANGPTL4,DUSP8,IL7,CDKN2D,CDKN2A,PSME3,PPP2R1A,GPS2,DUSP9,UBE2D1,LTB4R2,CAND1,APOA1,CAV1,GADD45A,CCR2,RGS3,NOS3,ATP7A,DHCR24,SPRY1,GCKR,CDC27,BIRCS,CBLC,NR4A1,SH3BP5,LEPR,THY1,DUSP19,SPRED2,NOSIP,PSMD2,SPRY2,PSMB10,PIF1,LATS2,ANAPC1,PPARG,NF2,CDK5RAP1,FZR1,PTPN6,TRIB3,TSC2,HMGCN,NPR3,HSPA1B,NEIL1,GADD45B,SPRY4,SORT1,YWHAG,TRIB1,TRP73,SFN,GRM2,APC,NF1,PALM,APOC3,PRKCA,SPRED3,GABBR2,RB1,DUSP6 |
| GO:0030388             | 0.174705 | 0       | 0   | 72              | phosphoinositide metabolic process        | PIGU,PIGH,PIP4K2A,IMPA1,PTPMT1,PIGG,FRAG1,PIK3C3,DPM1,PIGV,PIGA,CDIPT,CD81,PIGK,PI4K2A,PIK3C2A,PIGX,PITPNC1,PIGV,PIGQ,IHPK1,PIGL,PIGW,DPM2,PIK3CG,SACM1L,PIP5K1A,PIGB,NUDT4,PI4KB,IHPK2,PIK3R1,PIGN,PIK3C2G,PLAUR,PIGP,PITPNM3,PLCB1,PIP4K2C,GPLD1,PGAP1,DPM3,PIGS,GPA1,PIGY,PIGT,PIP5K1L,C130090K23RIK,PIK3CA,PIGO,PDGFA,PIK3CB,PTEN,PIGC,PLCD4,PIP5K1B,SEMA6D,PIP4K2B,PIGM,IHPK3,PIP5K3,PDGFB,PIP5K1C,PIGZ,GALR2,IPMK,PLCH2,SYNJ1,PIK3CD,PI4KA,PELRLD1,PIK3C2B                                                                                                                                                                                                                                                                                                                                                                                                                                                                                                                                                                                                                                                                                                                                                                   |
| GO:0017034             | 0.159469 | 0       | 0   | 138             | protein import                            | TIMM8B,MBTPS1,NXT2,RBM22,PEX7,PPIH,TOMM22,PTTG1IP,KPNA1,TIMM8A1,AIP,F2R,MAPK3,ARNTL,PEX10,DNAJC19,TIMM9,RANBP17,FYB,PEX26,PRKCC,NOL5,PRICKLE1,PRDX1,RPL23,PKIG,EDAR,TOB1,HSPD1,TOMM20,GLI3,SMAD3,MXI1,FAF1,RHOA,G3BP2,PEX13,PML,MAPK1,FGF9,NFKBIA,IPO13,IPO7,KPNA2,RAN,IL10,KPNA3,PDIA3,NLRP3,IPO11,GRPEL1,IKKBG,TIMM10,CFL1,IL20,TMCO6,XPO7,CRY2,TGFB3,NXF7,NOLC1,FGF2,SIRT1,POLA2,PPP1R10,TRP53,TGFB1,MCM3AP,CEP57,TACC3,TIMM8A2,PEX3,EDA,XPO6,CSE1L,ZFYVE9,PKIA,KPNA4,CD27,ABRA,PRL,XPO1,TRIP6,PEX14,NUTF2,MDF1,TIMM13,PPP3CA,NDUFA13,AK2,KPNA6,F2,PEX6,PEX12,SHH,SNUPN,HNF4A,RPAIN,SUFU,SIX3,GCKR,NUP205,CDH1,NCKIPSD,PEX1,AGTR2,TNPO1,BCL3,NFKBIE,IPO9,FXC1,RANBP2,TNFSF14,TNF,UACA,SMO,NUP98,PEX16,CBLB,NFKBIL1,SIX2,IPO4,AKT1,NUP214,TSC2,TRPS1,TNPO2,KPNB1,FGF10,IPO8,BCL6,NF1,IPO5,TPR,FLNA,RERE,SPNB2,HTT                                                                                                                                                                                                                                                                                                                                                                                                                |
| GO:0016051             | 0.156853 | 0       | 0   | 53              | vesicle organization and biogenesis       | SRGN,PSEN1,COPB1,COPE,COPB2,ATG16L1,PRKCI,ZDHHC15,COPG,ARCN1,ATG4C,ATG5,FBXO5,ATG4D,HINT1,ATG12,ATG4B,ZFYVE16,COPZ1,CTSD,SHROOM2,ARF1,TYRP1,LYST,P2RX7,CALY,BECN1,MAP1LC3A,CNO,EPS15,A,SYP,AP2S1,ABCA1,ATG9A,RAB3A,PICALM,ARFGAP1,CAV1,COPA,CAV2,STXBP1,ATG4A,DLG4,CADPS,ALS2,BCL2,SNAP91,ATG9B,SORT1,HIP1,GBF1,UNC13A                                                                                                                                                                                                                                                                                                                                                                                                                                                                                                                                                                                                                                                                                                                                                                                                                                                                                                             |
| GO:0016561             | 0.144447 | 0       | 0   | 102             | protein ubiquitination                    | NSMCE2,FBXO25,SUZ12,RBX1,TSG101,FBXO32,GCLC,ATG3,FBXO3,SMURF1,FBXL21,MAP3K1,RNF217,SAE1,RBBP6,FBXL3,UBE2C,VHLH,STUB1,RNF2,PPIL2,UBE2V2,UBE2V1,ATG5,CUL5,RPS27A,BMI1,DZIP3,TRIM23,UBE2G1,UHRF2,SUMF1,CHFR,CDK5,KCMF1,MUL1,RFFL,FGFR3,ANAPC11,LNX1,PARK2,FBXW11,GTPBP4,RNF144B,ERCC8,UBOX5,AMFR,HERC5,BCL10,PCNP,WDSUB1,UBB,FBXO4,FBXL5,UBE2N,PRPF19,RNF11,FBXO11,CBX8,LRRK2,SHAH2,UBQLN1,UBE3C,MGRN1,TSPAN17,BRCA1,VCP,RNF139,ATG7,DDDB2,MIB2,TSC1,UBE2D1,CAND1,TRAF6,HDAC6,FBXO9,FBXW7,FBXO24,BARD1,WWP1,NHLRC1,GSPT1,RING1,NOSIP,SIAH1A,FBXO10,UBE4A,MDM2,LMO7,TRAF7,AKT1,RAB26,TRIP12,SOC5,BCL2,MYLIP,NEDD4L,UBE4B,CBL,HUWE1,BIRC6                                                                                                                                                                                                                                                                                                                                                                                                                                                                                                                                                                                               |
| GO:0006651             | 0.141477 | 0       | 0   | 104             | glycerophospholipid metabolic process     | PIGU,PIGH,PIP4K2A,IMPA1,PTPMT1,PIGG,PCYT1A,FRAG1,PTDSS1,PIK3C3,DPM1,CHPT1,PIGF,PIGA,SERINC3,CDIPT,CD81,PIGK,FGF7,PHKA1,PI4K2A,PIK3C2A,LRAT,PIGX,PITPNC1,PIGV,SERINC1,ALDH5A1,PLA1A,PIGQ,IHPK1,PIGL,PIGW,DPM2,SERINC5,PIK3CG,SACM1L,AGPAT1,PIP5K1A,PIGB,NUDT4,LYPLA3,FABP5,PI4KB,IHPK2,PIK3R1,PIGN,PIK3C2G,PLAUR,PIGP,PITPNM3,SERINC2,FABP3,PLCB1,PIP4K2C,PEMT,GPLD1,PGAP1,DPM3,PIGS,GPA1,PIGY,AGPAT2,LIPC,PIGT,PIP5K1L,C130090K23RIK,PIK3CA,APOA1,PIGO,PLA2G1B,TAZ,PTDSS2,PNPLA7,PDGFA,PIK3CB,APOA4,PTEN,PLA2G4B,CHKA,PIGC,LCAT,PIGA,SNAP91,PCYT1B,PLA2G4C,PLCD4,PIP5K1B,SH3GLB1,SEMA6D,PIP4K2B,PIGM,IHPK3,PIP5K3,PDGFB,PIP5K1C,PIGZ,GALR2,IPMK,PLCH2,SYNJ1,PIK3CD,PI4KA,PELRLD1,PIK3C2B                                                                                                                                                                                                                                                                                                                                                                                                                                                                                                                                           |

Table S3A. Gene sets up-regulated by severe stress plus morphine

| Gene Ontology category | Score    | p-value | FDR | Gene set length | Gene_set_description                       | Gene_set_genes                                                                                                                                                                                                                                                                                                                                                                                                                                                                                                                                                                                                                                                                                                                                                                                                                                                                                                                                                                                                                                                                                                                                                                                                                                                                                                                                                                                                                                                                                                                                                                                                                                                                                                                                                                                                                                                                                                                                                                                                                                                                                                                                                                                                                                                                                                                                                                                                            |
|------------------------|----------|---------|-----|-----------------|--------------------------------------------|---------------------------------------------------------------------------------------------------------------------------------------------------------------------------------------------------------------------------------------------------------------------------------------------------------------------------------------------------------------------------------------------------------------------------------------------------------------------------------------------------------------------------------------------------------------------------------------------------------------------------------------------------------------------------------------------------------------------------------------------------------------------------------------------------------------------------------------------------------------------------------------------------------------------------------------------------------------------------------------------------------------------------------------------------------------------------------------------------------------------------------------------------------------------------------------------------------------------------------------------------------------------------------------------------------------------------------------------------------------------------------------------------------------------------------------------------------------------------------------------------------------------------------------------------------------------------------------------------------------------------------------------------------------------------------------------------------------------------------------------------------------------------------------------------------------------------------------------------------------------------------------------------------------------------------------------------------------------------------------------------------------------------------------------------------------------------------------------------------------------------------------------------------------------------------------------------------------------------------------------------------------------------------------------------------------------------------------------------------------------------------------------------------------------------|
| GO:0006644             | 0.105813 | 0       | 0   | 243             | membrane lipid metabolic process           | B4GALT4,PPAP2A,PIGU,PIGH,PIP4K2A,IMPA1,PTPMT1,PIGG,PCYT1A,TEX2,FRAG1,PTDSS1,PIK3C3,DPM1,CHPT1,PIGF,HEXA,PP T1,PIGA,PPP2CA,AGPAT5,LYCAT,CEPT1,SERINC3,GLA,CDIPT,PGS1,HEXB,CD81,MBOAT5,UGT8A,CLN3,PIGK,AGPAT9,GPX4,CLN 8,FGF7,PHKA1,SMPDL3B,SMPD1,GM2A,PHCA,ASAH1,PI4K2A,ST8SIA6,ITGB8,PIK3C2A,LRAT,SGMS2,SMPD3,UGCG,PIGX,PITPN C1,ST8SIA3,PIGV,PBX2,SGPP1,ASAH2,SERINC1,LPGAT1,ALDH5A1,PLA1A,PPAP2B,A4GALT,MAN1B1,GPAM,PIGQ,IHPK1,PIGL,PL A2G2A,AYTL1B,PIGW,JSYNA1,DSWSU178E,DPM2,DOLK,PLA2G2C,GBA2,D2HGDH,PRDX6,LASS5,GALC,SERINC5,PIK3CG,PLA2G 2D,LASS2,SACM1L,ETNK1,PCSK9,AGPAT3,AGPAT1,PLCE1,NSMAF,LASS3,PIP5K1A,PIGB,ANGPTL3,NUDT4,CLN6,LYPLA3,FABP5, PI4KB,SMPDL3A,HMOX1,IHPK2,SGMS1,PIK3R1,GRN,PIGN,APOM,GAL3ST1,ENPP7,SPTLC1,ASAH3L,SGPL1,PIK3C2G,PLAUR,AS3 0057A03RIK,PLCB3,PRKAA1,PIGP,PLA2G12B,PITPNM3,SERINC2,FABP3,PLCB1,PIP4K2C,CREBL1,LPCAT2,PEMT,GPLD1,PLA2G4F ,PSAP,PGAP1,ST6GALNAC6,SMPD2,FADS1,ST3GAL6,DPM3,GBA,PIGS,CRLS1,PLA2G6,ST6GALNAC1,OC90,CERK,GPA1,PIGY,AP OC2,SFTPB,AGPAT2,LIPC,NOTCH4,SAMD8,PIGT,PLA2G4A,PSAPL1,PLA2G3,PLA2G4D,PLA2G5,CDS2,SPHK2,PLA2G12A,PPP2R1A ,PIP5KL1,LPCAT1,ARV1,PLAA,AGPAT4,C130090K23RIK,PIK3CA,APOA1,SNCA,PLA2G2F,ST3GAL5,PIGO,PLA2G1B,TAZ,PCYT2,PAF RNF7,XIAP,GLO1,DNAJB9,IL1A,BIRC2,TXNDC1,BNIP1,FRAG1,SPP1,TCF7L2,PSEN1,IL31RA,GCLC,G6PDX,BRE,SERBP1,GPX1,TRIA P1,CFDP1,CDKN1A,SMAD1,RELA,SEMA4D,TAX1BP1,ANXA1,CDC2A,ANXA5,PTMA,DAD1,HBXIP,SOD2,VNN1,SLC9A1,HSP90B1, NME5,HDAC1,BCL2L1,NPM1,PRKCZ,PIM2,CDH13,STAR,ADAM17,TSC22D3,HSPA9,NPY5R,BFAR,TGFA,HSPD1,QARS,IL2,AATF,A VEN,NFKB1,NR3C1,HELLS,HSPB1,SYVN1,HSPA1A,CLU,STAMBP,HDAC3,RTKN,TXNDC5,STAT5B,CBX4,TPT1,SFRP1,CRYAA,IL3,IL1 0,MPO,FOXO1,BNIP3L,BAG4,AMIGO2,ZC3HC1,CFL1,POLB,BECN1,SKP2,EEF1A2,GSTP1,PAX7,PRLR,PRDX2,BAG1,SOD1,FAIM2,B CL2L2,SERPINB2,ARHGDI2,GDNF,ALS2CR2,CIAPIN1,HMOX1,CD40LG,TNFSF13B,PIK3R1,YWHAZ,TNFSF18,NOTCH2,ESR2,SERPI NB9,TRAF2,IL2RB,APOE,BTG2,PRKAA1,CASP2,HTATIP2,BNIP2,BCL2L10,CD27,DDAH2,CCL2,PEA15A,ALOX12,SGK3,ESR1,CRYAB ,FAIM,HMGB1,BIRC3,HIPK3,FOXC2,NOL3,PPID,MKL1,NME6,API5,MCL1,CFLAR,GFRAL,TNFAIP8,EEF1A1,IL7,CDKN2D,FAS,IGF1R ,SPHK2,IGF1,PIK3CA,SNCA,CAV1,PRNP,BDNF,DHCR24,CD28,ERBB4,BIRC5,PROK2,CEBPB,PAFAH2,ADM,FAIM3,MYC,MAPK8IP2, ALOX15,ANGPT1,SOCS3,RASA1,TBX3,TNFRSF18,OPA1,ANXA4,PTK2B,ATF5,FOXC1,TNF,ETS1,SH3GLB1,IER3,MALT1,HGF,STAT5 A,MAPK8IP1,CSF2,AKT1S1,GNRH1,NAIP2,PIK3R2,SNAI2,BRAF,PDGFRB,TRP63,AKT1,BAG3,HRK,BNIP3,GNAQ,BCL2,PAK7,TWIST |
| GO:0006914             | 0.102728 | 0       | 0   | 217             | anti-apoptosis                             | PSIP1,TLR7,KPNA1,C1QBP,WDR48,CCR5,MAPK3,EIF4E,PDCL3,SLC25A5,TSG101,ATP6V1H,GPX1,EIF4H,COPB1,APOA2,BTRC,CD 4,CEACAM2,CCDC86,CD81,SMARCB1,GUCY1A3,VDAC1,SLC20A2,TBP,SIVA1,CEACAM1,IFIH1,PSMC2,HS3ST5,EIF3M,TLR3,ATP6 VOC,IVNS1ABP,MAGI3,VAPB,RRAGA,CDC25C,SCARB1,TLR4,KIN,HSPD1,CREB3,CUL5,IFNB1,VCAM1,SGTA,CD86,LTBR,THEM4,IS G15,SMAD3,CD200R1,DERL1,VIM,COPS6,PML,MAPK1,NFKBIA,IPO7,DDX3X,KPNA2,RAN,CXCR7,ITGAV,SF3B2,VPRBP,TNIP1,SL AMF1,FKBP8,TBK1,UBN1,SLC25A4,DLG1,PPIA,BNIP3L,CCR3,KCTD5,EIF4A2,IKBK,POLR2E,USP7,RALA,WAPAL,PRMT6,GADD45 GIP1,TARBP2,RNF216,FYN,ACE2,LYN,PAK2,ALB,SUV39H1,IL2RG,SP1,WWP2,UCLL1,HCK,SRC,STAT1,TLR9,CEBPA,CCNT1,SIRT1, TLR1,EPOR,PSMC3,ITGB1,SYK,RXRA,TGFB1,PIK3R1,UBE2I,MLF1IP,IL2RB,CLDN1,RNGTT,NFX1,FADD,ABCE1,KRT18,YWHAE,UBE 3A,HTATIP2,PVRL1,RTN3,RAD23A,CXCR4,SYNCRIP,BANF1,MFGE8,MDFIC,C9,XPO1,GTf2B,CD247,CREB1,NEDD4,RCOR1,ITCH,F CGR2B,MAP3K5,TLR2,VAC14,KRT19,GRB2,AP1G2,FBLN1,PDCC6IP,CFLAR,STAT3,PIAS4,HAVCR1,PACS1,PVR,CCR2,CRTC2,UNG, CD46,CD93,DDB1,LCK,NOD2,EIF2AK2,PLCG1,ATF7IP,ACOT8,TLR6,AMBIP,CCNT2,KRT7,CARM1,WWP1,MYC,CRTC1,TNPO1,ITGB 3,TNFRSF1A,ANPEP,KRT8,KDR,FDPS,HPX,JMJD2A,TBC1D20,SNDD1,GPX2,NXF1,NUP98,MDM2,ITGA5,CENPA,PRF1,CLDN4,ZYX,EI                                                                                                                                                                                                                                                                                                                                                                                                                                                                                                                                                                                                                                                                                                                                                                                                                                                                                                                                                                                                                                                                                                                                                                                                             |
| GO:0044414             | 0.093323 | 0       | 0   | 225             | interspecies interaction between organisms | PES1,TMEM48,CYCS,PPT1,EMD,ZFP354A,UNC84A,SEP15,MOAP1,TPD52L1,DFFB,ZMPSTE24,DULLARD,RRN3,PML,TOP2A,TMP O,ATXN7,H1FNT,CIDEA,NOLC1,SOD1,AIFM1,BAX,TNP1,CASP3,DFFA,DNASE1L3,UNC84B,NDUFA13,CDKN2A,DEDD2,SYCP3,FO XL2,MYC,LMNA,DNASE1,TSSK6,WBP2NL,CECR2,NUP98,ACIN1,PRM2,SYNE1,BNIP3,PRM1,CD24A,NUMA1,BIRC7,CDAN1,POM1 21                                                                                                                                                                                                                                                                                                                                                                                                                                                                                                                                                                                                                                                                                                                                                                                                                                                                                                                                                                                                                                                                                                                                                                                                                                                                                                                                                                                                                                                                                                                                                                                                                                                                                                                                                                                                                                                                                                                                                                                                                                                                                                     |
| GO:0006991             | 0.082788 | 0       | 0   | 51              | nuclear organization and biogenesis        |                                                                                                                                                                                                                                                                                                                                                                                                                                                                                                                                                                                                                                                                                                                                                                                                                                                                                                                                                                                                                                                                                                                                                                                                                                                                                                                                                                                                                                                                                                                                                                                                                                                                                                                                                                                                                                                                                                                                                                                                                                                                                                                                                                                                                                                                                                                                                                                                                           |

Table S3B. Gene sets down-regulated by severe stress plus morphine

| Gene Ontology category | Score    | p-value | FDR | Gene set length | Gene_set_description                       | Gene_set_genes                                                                                                                                                                                                                                                                                                                    |
|------------------------|----------|---------|-----|-----------------|--------------------------------------------|-----------------------------------------------------------------------------------------------------------------------------------------------------------------------------------------------------------------------------------------------------------------------------------------------------------------------------------|
| GO:0001578             | -1.84065 | 0       | 0   | 13              | microtubule bundle formation               | OFD1,BBS2,UBE2B,TPPP,NEURL,GTRGEO22,PSRC1,MTAP1S,MTAP2,MARK4,CLASP1,MTAP1B,NAV1                                                                                                                                                                                                                                                   |
| GO:0007016             | -1.74121 | 0       | 0   | 9               | cytoskeletal anchoring at plasma membrane  | TLN2,EZR,DMD,GYPA,FLNB,TLN1,ANK3,SPN4,SHANK1                                                                                                                                                                                                                                                                                      |
| GO:0016079             | -1.04183 | 0       | 0   | 30              | synaptic vesicle exocytosis                | SNAPIN,PLDN,PSEN1,SYT2,SYT3,STX7,CPLX3,SNAP25,RAB3A,LPHN1,STX3,TRIM9,GRIK5,CPLX1,NLGN1,STX4A,STXB2,CPLX2,S EPT5,APBA2,UNC13B,SYT1,SNPH,STX1A,APBA1,VAMP2,DOC2A,SPNB3,RIMS1,PCLO                                                                                                                                                   |
| GO:0030516             | -1.00082 | 0       | 0   | 19              | regulation of axon extension               | CDH4,SEMA3A,NTN1,SEMA3F,RNF6,APOE,TNFRSF12A,BARHL2,LIMK1,TTL,DPYSL2,SEMA4F,RTN4,MAPT,NRCAM,NGF,NRP1,N TRK3,PLXNA3                                                                                                                                                                                                                 |
| GO:0042403             | -0.98071 | 0       | 0   | 16              | thyroid hormone metabolic process          | SULT1B1,TTR,SLC5A5,DUOX2,DIO3,DIO1,MED1,TG,CGA,DIO2,TPO,FOXE1,KCNJ6,CACNA1A,SLCO4A1,RELN                                                                                                                                                                                                                                          |
| GO:0016573             | -0.94715 | 0       | 0   | 17              | histone acetylation                        | PPARGC1A,BMI1,SET,MYST1,HTATIP,CPA4,MBD3,MSX3,PCAF,METTL8,FOX3,MYST3,PCGF2,MYST4,CREBBP,TRRAP,EP300                                                                                                                                                                                                                               |
| GO:0021766             | -0.84135 | 0       | 0   | 17              | hippocampus development                    | BBS4,MKKS,BBS2,ID4,CDK5,YWHAE,CASP3,BBS1,TSC1,PAFAH1B1,LEF1,TRP73,EMX2,ZEB2,LRP8,WNT3A,PLXNA3                                                                                                                                                                                                                                     |
| GO:0050771             | -0.83676 | 0       | 0   | 20              | negative regulation of axonogenesis        | SPP1,PSEN1,SEMA3A,NTN1,SEMA3F,MBP,RNF6,RUFY3,ULK2,PTK2,THY1,RTN4R,ULK1,SEMA4F,RTN4,CLK8,CSPG4,NRP1,PLXN A3,SYNGAP1                                                                                                                                                                                                                |
| GO:0018409             | -0.8233  | 0       | 0   | 10              | peptide or protein amino-terminal blocking | ARD1,NAT13,HHATL,NMT1,NARG1,NARG1L,MAP6D1,NMT2,CREBBP,EP300                                                                                                                                                                                                                                                                       |
| GO:0018205             | -0.81099 | 0       | 0   | 10              | peptidyl-lysine modification               | DOHH,DHPS,EIF5A,EIF5A2,PLOD1,ATP7A,IVL,TGM2,CREBBP,EP300                                                                                                                                                                                                                                                                          |
| GO:0048489             | -0.80365 | 0       | 0   | 51              | synaptic vesicle transport                 | SNAPIN,PLDN,PSEN1,SYT2,ZDHHC15,SYT3,CDK5,LIN7A,EEA1,STX7,CPLX3,SYP,CTNNB1,SNAP25,RAB3A,DNM2,LPHN1,STX3,SN CA,AMPH,TRIM9,GRIK5,SYT4,CPLX1,NLGN1,DEPND1A,MYLK2,STXB1,STX4A,STXB2,CPLX2,DLG4,SEPT5,BIN1,APBA2,SH3GL2 ,SLC18A2,CD24A,UNC13B,SYNJ1,SYT1,SNPH,STX1A,APBA1,ITSN1,VAMP2,DOC2A,SPNB3,UNC13A,RIMS1,PCLO                     |
| GO:0021795             | -0.7981  | 0       | 0   | 13              | cerebral cortex cell migration             | PSEN1,PEX13,LHX6,CDK5,RAC1,POU3F2,PEX5,ARX,PAFAH1B1,POU3F3,DAB1,LRP8,RELN                                                                                                                                                                                                                                                         |
| GO:0043488             | -0.79372 | 0       | 0   | 14              | regulation of mRNA stability               | SERBP1,CALCR,PAIP1,ZFP36L1,ELAVL1,ZFP36,PABPC1,HNRNP,MAPKAPK2,ZFP36L2,BRF1,APOBEC1,VEGFA,YBX2                                                                                                                                                                                                                                     |
| GO:0007628             | -0.79081 | 0       | 0   | 24              | adult walking behavior                     | GLRB,GLRA1,HEXA,KLHL1,UCHL3,DRD2,CLN8,TRH,DRD1A,EFNB3,SCN1A,HTRA2,UCHL1,CHAT,ATG7,CACNB4,FXN,PCDH15,KCN MA1,CHD7,SCN8A,EPHA4,CACNA1A,CACNA1C                                                                                                                                                                                      |
| GO:0043113             | -0.78335 | 0       | 0   | 14              | receptor clustering                        | GRIK2,PICK1,MUSK,CLEC21,CDK5,PAK1,DOK7,LRP4,DLG2,GRIK5,DVL1,AGRN,CACNA1A,SYNGAP1                                                                                                                                                                                                                                                  |
| GO:0050770             | -0.74851 | 0       | 0   | 51              | regulation of axonogenesis                 | ACHE,SPP1,PSEN1,SEMA4D,CDH4,SEMA3A,NTN1,SEMA3F,MBP,PLXNB2,RNF6,LRRC4C,ROBO2,POU3F2,WNT7A,RUFY3,APOE, TNFRSF12A,NEFL,BARHL2,PLXNB1,ULK2,MIF,EFNA1,PTK2,THY1,CDH2,LIMK1,AMIGO1,TTL,NEFM,METRN,RTN4R,DPYSL2,ULK1 ,TIAM1,SEMA4F,RTN4,CLK8,CSPG4,MAPT,NRCAM,NGF,EPHB2,ROBO1,NRP1,SLIT2,NTRK3,CACNA1A,PLXNA3,SYNGAP1                    |
| GO:0021885             | -0.74148 | 0       | 0   | 16              | forebrain cell migration                   | PSEN1,DRD2,DRD1A,PEX13,LHX6,CDK5,RAC1,POU3F2,PEX5,ARX,PAFAH1B1,POU3F3,DAB1,EMX2,LRP8,RELN                                                                                                                                                                                                                                         |
| GO:0048675             | -0.73554 | 0       | 0   | 30              | axon extension                             | NDN,CDH4,SEMA3A,NTN1,SEMA3F,RNF6,CDK5,CDK5R1,APOE,TNFRSF12A,BARHL2,ULK2,LAMB2,DCLK1,POU4F2,LIMK1,TTL,D PYSL2,CYFIP1,ULK1,SEMA4F,RTN4,POU4F3,MAPT,NRCAM,NGF,DCX,NRP1,NTRK3,PLXNA3                                                                                                                                                  |
| GO:0017157             | -0.71009 | 0       | 0   | 37              | regulation of exocytosis                   | POU5F1,FCER1G,RAPGEF4,RAB27B,PRAM1,MS4A2,RAB3B,CDK5,EXOC2,FEZ2,B4GALT1,FGF2,HMOX1,SYK,FCER1A,SYCN,TRPV 6,RAB3A,RAB3D,RPH3AL,RAB3C,TRIM9,SYT4,FREQ,TRAF7,SEPT5,RAB26,CADPS,CADPS2,PRKCA,SYT1,STX1A,VAMP2,SPNB3,CA CNA1A,MYO5A,PCLO                                                                                                 |
| GO:0021543             | -0.64195 | 0       | 0   | 37              | pallium development                        | BBS4,TACC1,PSEN1,MKKS,BBS2,PAX6,ID4,PEX13,LHX6,CDK5,RAC1,POU3F2,PEX5,ARX,TACC3,YWHAE,CASP3,BBS1,NR2E1,ATG 7,TSC1,PAFAH1B1,CCDC100,AHSG,LEF1,TACC2,FGF8,POU3F3,DAB1,TRP73,NF1,EMX2,ZEB2,LRP8,WNT3A,PLXNA3,RELN                                                                                                                     |
| GO:0043487             | -0.64024 | 0       | 0   | 16              | regulation of RNA stability                | SERBP1,CALCR,PAIP1,ZFP36L1,ELAVL1,MEX3D,ZFP36,TNFRSF1B,PABPC1,HNRNP,MAPKAPK2,ZFP36L2,BRF1,APOBEC1,VEGFA ,YBX2                                                                                                                                                                                                                     |
| GO:0016358             | -0.63484 | 0       | 0   | 55              | dendrite development                       | MCF2,BBS4,ACHE,CHRNA3,KLHL1,SMAD1,IGSF9,CHRN2,HPRT1,LZTS1,TRAPPC4,PSCD2,SGK1,RHOA,CIT,CDK5,PAK1,RAC1,NT RK2,CACNA1F,MYO6,KNDC1,ABI2,YWHAH,CHAT,BBS1,SCARF1,MT3,APP,ARF6,LST1,MECP2,GHRL,DCLK1,BDNF,ATP7A,SS18L1, PRKG1,TLX2,DVL1,PPP1R9B,PTPRF,FEZF2,GRIN3A,DBN1,DCX,SIPA1L1,MTAP2,NRP1,KALRN,CACNA1A,KLF7,MTAP1B,CELSR2,S YNGAP1 |
| GO:0030252             | -0.61733 | 0       | 0   | 11              | growth hormone secretion                   | DRD2,PTPN11,SNAP25,GAL,KISS1,GHRL,GHRHR,GHSR,GHRH,LTBP4,CACNA1C                                                                                                                                                                                                                                                                   |
| GO:0031365             | -0.61374 | 0       | 0   | 12              | N-terminal protein amino acid modification | ARD1,NAT13,HHATL,NMT1,NARG1,METAP2,NARG1L,MAP6D1,METAP1,NMT2,CREBBP,EP300                                                                                                                                                                                                                                                         |
| GO:0045109             | -0.61279 | 0       | 0   | 12              | intermediate filament organization         | KRT9,KRT20,KRT6B,DNAJB6,NEFL,KRT25,KRT6A,NEFM,HRB,KRT17,NEFH,TCHH                                                                                                                                                                                                                                                                 |
| GO:0007632             | -0.55682 | 0       | 0   | 33              | visual behavior                            | DRD2,PDE1B,CHRN2,DRD1A,ADAM2,SGK1,CDK5,DRD3,NLGN3,DYNLRB1,DBH,ATXN1,ADRA1B,DRD5,GRIN1,APP,NPHP1,APB B1,KRAS,GHRL,NRAS,RIC8,ATP1A2,CRHR1,NPHP4,HMGCR,KIT,NF1,GRIN2A,ATP1A3,HTT,CACNA1C,SYNGAP1                                                                                                                                     |
| GO:0021533             | -0.55372 | 0       | 0   | 14              | cell differentiation in hindbrain          | RORA,LDB1,MTPN,WNT7A,LHX5,KNDC1,ATP7A,PHOX2B,ATP2B2,AGTPBP1,ULK1,FOXA2,LHX1,CACNA1A                                                                                                                                                                                                                                               |
| GO:0006473             | -0.54429 | 0       | 0   | 24              | protein amino acid acetylation             | HAT1,ARD1,NAT13,PPARGC1A,NARG1,BMI1,NARG1L,SET,MYST1,HTATIP,CPA4,MBD3,MSX3,PCAF,ING4,METTL8,ING5,FOX3, MYST3,PCGF2,MYST4,CREBBP,TRRAP,EP300                                                                                                                                                                                       |

Table S3B. Gene sets down-regulated by severe stress plus morphine

| Gene Ontology category | Score    | p-value | FDR | Gene set length | Gene_set_description                                              | Gene_set_genes                                                                                                                                                                                                                                                                                                                                                                                                                                                                                                                                                                                                              |
|------------------------|----------|---------|-----|-----------------|-------------------------------------------------------------------|-----------------------------------------------------------------------------------------------------------------------------------------------------------------------------------------------------------------------------------------------------------------------------------------------------------------------------------------------------------------------------------------------------------------------------------------------------------------------------------------------------------------------------------------------------------------------------------------------------------------------------|
| GO:0050885             | -0.54388 | 0       | 0   | 35              | neuromuscular process controlling balance                         | HEXA,GAA,HEXB,CLN3,SOX2,CLN8,GM2A,ADCY5,APLP2,NBN,TPP1,CLIC5,GRIN2C,NEFL,RAC3,CDH23,APP,POU4F1,POU4F2,PAFAH1B1,CLRN1,NKX6-2,USH1C,ATP2B2,PUNC,MYH10,MYO7A,POU4F3,USH1G,FOXSI1,PCDH15,KCNMA1,HMX3,CACNA1A,MYO5A                                                                                                                                                                                                                                                                                                                                                                                                              |
| GO:0045429             | -0.54158 | 0       | 0   | 14              | positive regulation of nitric oxide biosynthetic process          | EGFR,HRH1,DDAH1,ITGB2,PTX3,HSP90AA1,JAK2,AGTR2,KLRK1,TICAM1,HSP90AB1,P2RX4,INSR,ICAM1                                                                                                                                                                                                                                                                                                                                                                                                                                                                                                                                       |
| GO:0045104             | -0.53503 | 0       | 0   | 22              | intermediate filament cytoskeleton organization and biogenesis    | KRT9,CLN8,VP554,ERBB2IP,KRT20,KRT6B,DNAJB6,SOD1,NDEL1,NEFL,KRT25,KRT16,KRT6A,PRPH,NEFM,INA,HRB,RGNEF,KRT17,NEFH,TCHH,DST                                                                                                                                                                                                                                                                                                                                                                                                                                                                                                    |
| GO:0048638             | -0.53131 | 0       | 0   | 16              | regulation of developmental growth                                | SPP1,MUSK,COL4A4,ADRB2,MSTN,DLG1,UBB,RPS6KB1,TGFBR2,MIF,HOPX,P2RX5,KLK8,INSR,AGRN,NTRK3                                                                                                                                                                                                                                                                                                                                                                                                                                                                                                                                     |
| GO:0001756             | -0.51883 | 0       | 0   | 33              | somitogenesis                                                     | DLL3,PSEN1,AXIN2,SFRP2,MEOX1,ABI1,SFRP1,RIPPLY2,RIPPLY1,GCN5L2,IFITM1,PCDH8,MYF5,T,MEOX2,MESP2,PSEN2,PAX1,MYF6,VBX18,HES7,DLL1,MSGN1,LEF1,NCKAP1,PRKDC,MIB1,POFUT1,ZEB2,ROR2,WNT3A,ATM,EP300                                                                                                                                                                                                                                                                                                                                                                                                                                |
| GO:0007172             | -0.5151  | 0       | 0   | 22              | signal complex assembly                                           | GRIK2,PICK1,MUSK,CLEC2I,CDK5,PAK1,NCK1,DOK7,SRC,LRP4,CD3E,DLG2,NCK2,GRIK5,PTK2,MAPK8IP2,PTK2B,DVL1,PXN,AGRN,CACNA1A,SYNGAP1                                                                                                                                                                                                                                                                                                                                                                                                                                                                                                 |
| GO:0007009             | -0.50608 | 0       | 0   | 13              | plasma membrane organization and biogenesis                       | A4GALT,SOD1,PLSCR2,PLSCR4,CAV3,S100A9,DYSF,PLSCR1,SYT7,MYH10,PLSCR3,MYH2,AGRN                                                                                                                                                                                                                                                                                                                                                                                                                                                                                                                                               |
| GO:0001704             | -0.50564 | 0       | 0   | 42              | formation of primary germ layer                                   | POU5F1,BMPR1A,SMAD1,TRIM15,FGFR2,BMP4,PRKACA,SMAD3,PRKAR1A,SMAD2,ECSIT,EXT2,TWSG1,MIXL1,WNT3,MESP1,CTNNA1,FOXC2,BMP7,ACVR1,TXNRD1,EOMES,HNF1A,KLF4,FOXC1,LEF1,NF2,NCKAP1,EYA2,TLX2,HAND1,NANOG,FOXA2,CHRD,TBX6,LHX1,BMPR2,MACF1,SLIT2,WNT3A,NR4A3,HTT                                                                                                                                                                                                                                                                                                                                                                       |
| GO:0051016             | -0.50121 | 0       | 0   | 26              | barbed-end actin filament capping                                 | GSN,CAPZB,WNT2,SCIN,RDX,CAPZA3,SPNB1,DBNL,CAPZA2,CAPZA1,VILL,ASZ1,SVIL,EVL,SPNA1,CAV2,AVIL,EPB4.9,CAPG,CTTNBP2,TRIOBP,VIL1,MET,SPNB3,SPNB2,SPNA2                                                                                                                                                                                                                                                                                                                                                                                                                                                                            |
| GO:0006607             | -0.48611 | 0       | 0   | 12              | NLS-bearing substrate import into nucleus                         | KPNA1,FYB,KPNA2,KPNA3,KPNA4,KPNA6,NCKIPSD,CBLB,TRPS1,KPNB1,IPO5,RERE                                                                                                                                                                                                                                                                                                                                                                                                                                                                                                                                                        |
| GO:0016569             | -0.46637 | 0       | 0   | 65              | covalent chromatin modification                                   | HDAC11,EZH2,SUZ12,PHB,EED,RPS6KAS,PRMT8,RNF2,HDAC1,PPARGC1A,BMI1,HDAC2,HELLS,JMJD1A,HDAC3,SUV39H2,PAX5,PRDM9,SUV39H1,SET,MYST1,SIRT1,MEN1,HTATIP,CPA4,SIRT2,SUV420H1,HDAC8,MBD3,MSX3,UBE2N,PCAF,PRMT7,CBX8,PIM3,METT18,HDAC6,HDAC5,DNMT3A,RBM14,CARM1,EHMT1,RING1,USP22,DNMT3B,JMJD2A,NSD1,FOXP3,WHSC1L1,MYST3,MAP3K12,SUV420H2,PCGF2,HDAC9,HDAC10,MYST4,SATB1,EHMT2,HUWE1,JMJD3,SMARCA4,CREBBP,MLL1,TRRAP,EP300                                                                                                                                                                                                            |
| GO:0035023             | -0.46066 | 0       | 0   | 85              | regulation of Rho protein signal transduction                     | MCF2,ARHGFE15,SPATA13,RASGRF1,ARHGFE3,ARHGAP27,NGEF,PLEKHG6,FGD6,SYDE2,DNMBP,RAC1,ARHGFE9,SLC26A10,9130221D24RIK,RALBP1,SOS2,ARHGAP4,ARHGFE16,FOXJ1,ECT2,PLEKHG3,FGD1,STMN3,ABRA,VAV1,ARHGFE5,ARHGFE10,ARHGFE7,E130306D19RIK,ARHGFE2,OBSCN,ARHGAP20,DEPDC2,PLEKHG4,TSC1,ARHGFE6,PLEKHG1,ARHGFE18,NET1,ABR,PAFAH1B1,ARHGFE17,DOCK7,PLEKHG2,ARHGFE11,FGD5,ARHGFE19,VAV3,FGD4,CDH2,PTK2B,E130112L23RIK,FGD2,TIAM2,ARHGFE4,CENTD2,FGD3,ARHGFE10L,DLCL1,CENTD3,4933429F08RIK,FARP2,ALS2,RGNEF,MCF2L,TIAM1,VAV2,RASGRF2,BCL6,BC067047,FARP1,ARHGFE12,BCR,ITSN2,TTN,SOS1,D10ERTD610E,ITSN1,ARHGFE1,AKAP13,PLEKHG5,KALRN,TRIO,SYDE1 |
| GO:0035282             | -0.44126 | 0       | 0   | 48              | segmentation                                                      | DLL3,PSEN1,AXIN2,SFRP2,MEOX1,BMI1,ABI1,FRS2,SFRP1,RIPPLY2,HOXD8,RIPPLY1,GCN5L2,IFITM1,PCDH8,TCF3,MYF5,HOXB6,T,MEOX2,MESP2,PSEN2,EGR2,PAX1,MYF6,VBX18,HOXA2,HES7,PCSK6,DLL1,RPGRI1,MSGN1,TBX3,LEF1,MAFB,NCKAP1,DVL2,ACD,PRKDC,MIB1,POFUT1,TGDF1,ZEB2,MLL3,ROR2,WNT3A,ATM,EP300                                                                                                                                                                                                                                                                                                                                               |
| GO:0016570             | -0.43787 | 0       | 0   | 61              | histone modification                                              | HDAC11,EZH2,SUZ12,PHB,EED,RPS6KAS,PRMT8,RNF2,HDAC1,PPARGC1A,BMI1,HDAC2,JMJD1A,HDAC3,SUV39H2,PAX5,PRDM9,SUV39H1,SET,MYST1,SIRT1,MEN1,HTATIP,CPA4,SIRT2,SUV420H1,HDAC8,MBD3,MSX3,UBE2N,PCAF,PRMT7,CBX8,PIM3,METT18,HDAC6,HDAC5,RBM14,CARM1,EHMT1,RING1,USP22,JMJD2A,NSD1,FOXP3,WHSC1L1,MYST3,MAP3K12,SUV420H2,PCGF2,HDAC9,HDAC10,MYST4,SATB1,EHMT2,HUWE1,JMJD3,CREBBP,MLL1,TRRAP,EP300                                                                                                                                                                                                                                        |
| GO:0048008             | -0.43624 | 0       | 0   | 14              | platelet-derived growth factor receptor signaling pathway         | PDGFC,PDAP1,SRC,JAK2,PDGFA,PTEN,BCAR1,PDGFRA,PLAT,PDGFRB,PDGFB,RAPGEF1,BCR,VEGFA                                                                                                                                                                                                                                                                                                                                                                                                                                                                                                                                            |
| GO:0051693             | -0.43441 | 0       | 0   | 28              | actin filament capping                                            | GSN,CAPZB,WNT2,SCIN,RDX,CAPZA3,SPNB1,DBNL,CAPZA2,TPM1,CAPZA1,VILL,ASZ1,SVIL,TMOD3,EVL,SPNA1,CAV2,AVIL,EPB4.9,CAPG,CTTNBP2,TRIOBP,VIL1,MET,SPNB3,SPNB2,SPNA2                                                                                                                                                                                                                                                                                                                                                                                                                                                                 |
| GO:0035265             | -0.42973 | 0       | 0   | 24              | organ growth                                                      | AGT,PTPN11,SASH3,SMAD2,RAG2,SOD1,MEN1,ADRA1B,FOXC2,CCNB1IP1,IL7,ACVR2B,PTK2,STRA8,CGA,ADRA1A,FOXC1,FXN,CSDA,BCL2,HLX,EHMT2,BCL2L11,CACNA1C                                                                                                                                                                                                                                                                                                                                                                                                                                                                                  |
| GO:0045103             | -0.42561 | 0       | 0   | 29              | intermediate filament-based process                               | KRT9,CLN8,VP554,ERBB2IP,KRT20,VIM,KRT15,KRT6B,DNAJB6,KRT39,SOD1,NDEL1,NEFL,KRT25,KRT16,KRT76,KRT6A,KRT24,PRPH,NEFM,GFAP,INA,HRB,RGNEF,SYNC,KRT17,NEFH,TCHH,DST                                                                                                                                                                                                                                                                                                                                                                                                                                                              |
| GO:0046854             | -0.4205  | 0       | 0   | 14              | phosphoinositide phosphorylation                                  | PIK3C3,PIK3C2A,IHPK1,PIK3CG,PI4KB,IHPK2,PIK3R1,PIK3C2G,PIK3CA,PIK3CB,IPMK,PIK3CD,PI4KA,PIK3C2B                                                                                                                                                                                                                                                                                                                                                                                                                                                                                                                              |
| GO:0051173             | -0.41963 | 0       | 0   | 16              | positive regulation of nitrogen compound metabolic process        | HPRT1,EGFR,HRH1,COMT,DDAH1,ITGB2,PTX3,HSP90AA1,JAK2,AGTR2,KLRK1,TICAM1,HSP90AB1,P2RX4,INSR,ICAM1                                                                                                                                                                                                                                                                                                                                                                                                                                                                                                                            |
| GO:0002483             | -0.41632 | 0       | 0   | 22              | antigen processing and presentation of endogenous peptide antigen | H2-K1,POU5F1,AIF1,DAXX,DDR1,TAPBPL,B3GALT4,ATP6V1G2,WDR46,TCF19,TRPC4AP,PHF1,TAPBP,GTf2H4,LST1,ERAP1,LTB,H2-Q1,COL11A2,ZBTB9,TAP2,SYNGAP1                                                                                                                                                                                                                                                                                                                                                                                                                                                                                   |

Table S3B. Gene sets down-regulated by severe stress plus morphine

| Gene Ontology category | Score    | p-value | FDR | Gene set length | Gene_set_description                                      | Gene_set_genes                                                                                                                                                                                                                                                                                                                                                                                                                                                                                                                                                                                                                                                                                                                                                                                                                                                                                                                                                                                                                                                                                                                                                                       |
|------------------------|----------|---------|-----|-----------------|-----------------------------------------------------------|--------------------------------------------------------------------------------------------------------------------------------------------------------------------------------------------------------------------------------------------------------------------------------------------------------------------------------------------------------------------------------------------------------------------------------------------------------------------------------------------------------------------------------------------------------------------------------------------------------------------------------------------------------------------------------------------------------------------------------------------------------------------------------------------------------------------------------------------------------------------------------------------------------------------------------------------------------------------------------------------------------------------------------------------------------------------------------------------------------------------------------------------------------------------------------------|
| GO:0016568             | -0.41541 | 0       | 0   | 231             | chromatin modification                                    | SUPT4H2,HDAC11,EZH2,SMARCA5,YEATS4,TLK2,CLIC1,SMYD3,HLTF,RBBP7,SUZ12,ASF1A,DMAP1,MORF4L2,RBL1,SMARCA1,PHB,RBBP4,EED,SUPT4H1,RPS6KA5,L3MBTL2,EPC1,CBX3,ACTL6A,HMG20A,CSNK2B,SMARCB1,RUVBL2,BAT4,PRMT8,CHRAC1,SMARCA1,H2AFY,SAP18,RNF2,JMJD2D,MSL31,HDAC1,RUVBL1,INOC1,BCOR,BAZ1A,MORF4L1,JMJD2C,SMARCE1,PPARGC1A,UTP3,C4A,BMI1,SIRT5,NR3C1,HDAC2,HELLS,RCBTB1,JMJD1A,PRMT5,SMARCD1,HDAC3,SUV39H2,SETDB2,PAX5,CBX4,SMARCD3,H2AFY2,DAPK3,ING3,UBN1,EPC2,MYST2,PRDM9,NEU1,TAF5,RBL2,SIRT3,SUV39H1,AOF2,2410016006RIK,SET,ING2,MYST1,SIRT1,MEN1,CFB,BRDT,UTY,ASF1B,JARID1A,HTATIP,CPA4,2210018M11RIK,AEBP2,UTX,CEBP,SMYD1,SIRT2,TNP1,MTA2,BRD8,SUV420H1,WHSC1,HDAC8,TLK1,MBD3,PAD4,MSX3,UBE2N,CBX7,C2,FBXL11,NASP,GF11B,TBL1XR1,NG23,PCAF,TTF1,VPS72,PRMT7,ARID2,CBX8,JARID1D,KLF1,SIRT7,RCOR1,SMARCAD1,RNF20,SMARCC1,SETDB1,GS2,RSF1,PIM3,SYCP3,METTL8,HDAC6,HDAC5,JMJD2B,HILS1,SUDS3,DNMT3A,RBM14,HIRA,HNF1A,CARM1,EHMT1,JARID1C,RING1,JMJD1C,USP22,SETD8,DNMT3B,L3MBTL,STK19,HMG20B,JARID1B,TSPYL2,TAF6L,SETD1B,SIRT6,SUPT5H,JMJD2A,SETMAR,CHD1,PHF21A,CECR2,JMJD1B,NSD1,BAZ1B,FOXP3,WHSC1L1,NPM2,MYST3,MLL5,MAP3K12,SUV420H2,LY6G6C,RNF40,SETD2,SETD1A,SKIV2L,PCGF2,BNIP3,HDAC9       |
| GO:0048628             | -0.40771 | 0       | 0   | 34              | myoblast maturation                                       | ACTA1,MYLPF,TNNT2,MYOZ1,ITGB1,TMOD1,KCNH1,NEURL2,ACTC1,TCAP,NTN2L,MYL2,KRT19,CDON,CAST,ACTG1,OBSL1,NEB,BMP10,KRT8,CAPN2,CAPN3,MYH6,DYRK1B,MYH10,MYH9,CACNA1S,NEO1,MYH11,ADAM12,TTN,MYBPC3,XIRP1,CACNA1H                                                                                                                                                                                                                                                                                                                                                                                                                                                                                                                                                                                                                                                                                                                                                                                                                                                                                                                                                                              |
| GO:0048858             | -0.40248 | 0       | 0   | 418             | cell projection morphogenesis                             | MCF2,OFD1,PGRMC1,ARL6,CNTN4,BBS4,ACHE,CHRNA3,BBS5,SPP1,GRM4,PSEN1,TMHS,DYCN2L1,MKKS,NDN,KLHL1,BBS2,MAP2K1,DLX5,PAX6,SMAD1,IGSF9,RASGRF1,FEZ1,SEMA4D,DRD2,GJA1,S100A6,UBE2B,CHRN2B,EPHB1,ISL1,AFG3L2,ADORA2A,CNP,WASF2,TTC8,HPRT1,ERMN,PRKCQ,SLITRK2,LZTS1,CDH4,SEMA3A,EGFR,THBS4,TRAPPC4,EFNA5,CDCA2EP1,KAL1,SPAG6,SLITRK4,BAIAP2,TTYH1,NTN1,CDH13,CAPZB,IFT20,PSCD2,SEMA3F,RYK,MBP,B3GNT2,EFNB1,ALCAM,SLITRK6,CDCA2,PLXNB2,TTN,C30B,SGK1,RNF6,RDX,FGD6,RHOA,NEURL,CLU,ACTN2,CSPG5,LIMA1,PTPN11,E2F4,CIT,CDK5,CTNNA1,EFNB3,GBX2,SEPT2,SDCBP,CEP290,NUP85,PAK1,ATOH1,RAC1,FEZ2,VANGL2,NCK1,NTRK2,TSGA10,SHC1,P2RX7,CFL1,CLIC5,LRRK4C,PAX2,OTX2,ROBO2,TTC30A1,ERBB3,CDK5R1,TGFB3,BCL11B,POU3F2,WNT7A,SOD1,FEZF1,KBTBD10,ALKBH1,NUMB,SH2B1,GDNF,NRXN3,OPHN1,LPIN1,RUFY3,PPP1R9A,RXRA,CACNA1F,TBCE,ARX,PARD6B,FOXJ1,MYO6,BAIAP2L1,SPAG16,APOE,HOXA1,PCM1,TGFB1,TNFRSF12A,NDEL1,UBB,KNDC1,NCAM2,PVRL1,NUMBL,ABI2,NEFL,FGD1,CXCR4,NGFR,MMP2,BARHL2,TEK2,TNR,STMN3,UCHL1,YWHAH,MYO1A,AKAP4,SEMA3B,RUNX3,MAPK8,CXCL12,SNAP25,NTN2L,KIF3A,S100B,CHAT,PPP2R2B,ARFIP2,BMPR1B,CREB1,TTN,C30A2,PARD3,BBS1,PLXNB1,ULK2,SCARF1,CHST3,VAX1,NR2E1,MT3,PCNT,RAC3,NRN1,BMP7,ETV4,RAB3A,WHRN,CDH23,ERBB3 |
| GO:0017156             | -0.39176 | 0       | 0   | 39              | calcium ion-dependent exocytosis                          | GLRB,GLRA1,SYT5,POU5F1,VAMP3,RAPGEF4,RIMS2,SYT3,SCIN,SYT6,CDK5,VAMP7,GNDPA1,RIMS3,PKDREJ,B4GALT1,FGF2,SYCN,TRIM36,TRPV6,TNP2,ACR,RPH3AL,STX2,RAB3C,TRIM9,AKAP3,SYT4,SYT8,PLCD4,ARHGAP17,CADPS,SYT1,STX1A,VAMP2,SPN3,CACNA1A,CACNA1C,RIMS1                                                                                                                                                                                                                                                                                                                                                                                                                                                                                                                                                                                                                                                                                                                                                                                                                                                                                                                                            |
| GO:0030835             | -0.37651 | 0       | 0   | 30              | negative regulation of actin filament depolymerization    | GSN,CAPZB,WNT2,SCIN,RDX,LIMA1,CAPZA3,SPNB1,DBNL,CAPZA2,TPM1,CAPZA1,SHROOM2,VILL,ASZ1,SVIL,TMOD3,EVL,SPNA1,CAV2,AVIL,EPB4.9,CAPG,CTTNBP2,TRIOBP,VIL1,MET,SPNB3,SPNB2,SPNA2                                                                                                                                                                                                                                                                                                                                                                                                                                                                                                                                                                                                                                                                                                                                                                                                                                                                                                                                                                                                            |
| GO:0046834             | -0.36353 | 0       | 0   | 15              | lipid phosphorylation                                     | PIK3C3,PIK3C2A,IHPK1,PIK3CG,PI4KB,IHPK2,PIK3R1,PIK3C2G,AGK,PIK3CA,PIK3CB,IPMK,PIK3CD,PI4KA,PIK3C2B                                                                                                                                                                                                                                                                                                                                                                                                                                                                                                                                                                                                                                                                                                                                                                                                                                                                                                                                                                                                                                                                                   |
| GO:0019883             | -0.34546 | 0       | 0   | 24              | antigen processing and presentation of endogenous antigen | H2-K1,POU5F1,AIF1,DAXX,DDR1,TAPBP1,B3GALT4,ATP6V1G2,WDR46,TCF19,TRPC4AP,CD74,PHF1,TAPBP,ETF2H4,LST1,ERAP1,CD1D1,LTB,H2-Q1,COL11A2,ZBTB9,TAP2,SYNGAP1                                                                                                                                                                                                                                                                                                                                                                                                                                                                                                                                                                                                                                                                                                                                                                                                                                                                                                                                                                                                                                 |
| GO:0030042             | -0.32585 | 0       | 0   | 32              | actin filament depolymerization                           | GSN,CAPZB,WNT2,SCIN,RDX,LIMA1,CAPZA3,SPNB1,DBNL,CAPZA2,TPM1,CAPZA1,SHROOM2,CFL1,VILL,DSTN,ASZ1,SVIL,TMOD3,EVL,SPNA1,CAV2,AVIL,EPB4.9,CAPG,CTTNBP2,TRIOBP,VIL1,MET,SPNB3,SPNB2,SPNA2                                                                                                                                                                                                                                                                                                                                                                                                                                                                                                                                                                                                                                                                                                                                                                                                                                                                                                                                                                                                  |
| GO:0030521             | -0.32178 | 0       | 0   | 50              | androgen receptor signaling pathway                       | PPAP2A,POU5F1,AIF1,DNAJA1,MED16,NCOA4,DAXX,MED4,DDR1,MED17,PPARGC1A,PMPEA1,CCNE1,CDK7,JMJD1A,B3GALT4,PIAS1,RAN,PIAS2,ATP6V1G2,WDR46,TCF19,MED24,RNF4,RNF14,MED30,GRIP1,CTNNB1,PHF1,TAPBP,ETF2H4,BRCA1,LST1,MED1,AR,LTB,TGFB11,FHL2,NRIP1,MED14,MED13,COL11A2,NCOA3,THRAP3,ZBTB9,ARID1A,NCOA1,RB1,MED12,SYNGAP1                                                                                                                                                                                                                                                                                                                                                                                                                                                                                                                                                                                                                                                                                                                                                                                                                                                                       |
| GO:0043543             | -0.32123 | 0       | 0   | 35              | protein amino acid acylation                              | HAT1,ZDHHC17,ARD1,NAT13,HHAT1,ZDHHC15,NMT1,PPARGC1A,NARG1,BMI1,NARG1L,ZDHHC2,MAP6D1,ZDHHC1,SET,ZDHHC3,MYST1,HTATIP,CPA4,MBD3,MSX3,PCAF,HHAT,ING4,METTL8,ING5,NMT2,FOXP3,MYST3,PCGF2,MYST4,ZDHHC7,CREBBP,TRRAP,EP300                                                                                                                                                                                                                                                                                                                                                                                                                                                                                                                                                                                                                                                                                                                                                                                                                                                                                                                                                                  |
| GO:0051091             | -0.32039 | 0       | 0   | 48              | positive regulation of transcription factor activity      | PRDX3,AGT,RELA,PRKCQ,NPM1,TLR3,EDA2R,UBE2V1,TLR4,JMY,PYCARD,IKBK,ITGB2,MAP3K13,NLRC3,TGFB1,CEBP,EDA,BCL10,UBE2N,ABRA,CYTL1,CAT,NFAM1,KRAS,IAK2,SHH,CARD9,PLA2G1B,NOD2,RIK2,MYD88,IRAK2,HMGA2,TSSK4,CARD11,TICAM1,TNF,MALT1,IKKB,ERC1,CAMK2A,NCOA3,IL1B,AMH,CREBBP,ICAM1,EP300                                                                                                                                                                                                                                                                                                                                                                                                                                                                                                                                                                                                                                                                                                                                                                                                                                                                                                        |

Table S3B. Gene sets down-regulated by severe stress plus morphine

| Gene Ontology category | Score    | p-value | FDR | Gene set length | Gene_set_description                                    | Gene_set_genes                                                                                                                                                                                                                                                                                                                                                                                                                                                                                                                                                                                                                                                                                                                                                                                                                                                                                                                                                                                                                                                                                                                                                              |
|------------------------|----------|---------|-----|-----------------|---------------------------------------------------------|-----------------------------------------------------------------------------------------------------------------------------------------------------------------------------------------------------------------------------------------------------------------------------------------------------------------------------------------------------------------------------------------------------------------------------------------------------------------------------------------------------------------------------------------------------------------------------------------------------------------------------------------------------------------------------------------------------------------------------------------------------------------------------------------------------------------------------------------------------------------------------------------------------------------------------------------------------------------------------------------------------------------------------------------------------------------------------------------------------------------------------------------------------------------------------|
| GO:0051056             | -0.31408 | 0       | 0   | 250             | regulation of small GTPase mediated signal transduction | MCF2,TBC1D12,RAPGEF6,TBC1D7,ARHGEF15,POU5F1,RASGRP2,SPATA13,RASGEF1C,MAP2K1,TBC1D2B,TBC1D8,ARPP19,RASGRF1,RAPGEF4,RASGEF1A,AIF1,TBC1D15,RASGEF1B,ARHGEF3,EPO,FBXO8,TBC1D23,ARHGAP27,NGEF,IQGAP3,S1PR1,WDR67,PLEKHG6,DAXX,DDR1,TBC1D22A,RASGRP3,PSCD2,PSCD4,FGD6,B3GALT4,CENTA2,RAPGEF3,PPP2CB,RASA3,SYDE2,DNMBP,RA P1GAP,USP6NL,RAC1,ATP6V1G2,ARHGEF9,WDR46,ITPKB,NUP62,ARFGAP2,TCF19,HRBL,PLCE1,SLC26A10,9130221D24RIK,RALBP1,TBC1D17,SOS2,ARHGAP4,SMAP2,CRK,ARHGEF16,TBC1D22B,TBC1D19,FOXJ1,RABGAP1,NOTCH2,ICMT,ECT2,ARFGAP3,PLEKHG3,TBC1D25,KNDC1,FGD1,RALGDS,TBC1D8B,RAPGEF5,DDEFL1,STMN3,SMAP1,NRG1,ABRA,PSD4,VAV1,RABGAP1L,KITLA,RHGEF5,RASA2,CENTA1,A230067G21RIK,PHF1,ARHGEF10,A630047E20RIK,ARHGEF7,TBC1D9B,SGSM3,TBC1D4,E130306D19RIK,GARNL3,TAPBP,RASGRP4,ERBB2,GT2H4,ARHGEF2,OBSCN,ARF6,ARHGAP20,TBC1D30,DEPDC2,LST1,ARFGAP1,PLEKHG4,KRAS,ADPRHL1,TSC1,TBC1D10A,TBC1D13,IGF1,ARFGEF1,ARHGEF6,PLEKHG1,DAB2IP,TBC1D14,PSD,SIPA1,ARHGEF18,NRAS,NET1,PSCD3,ABR,PAFAH1B1,ARHGEF17,TBC1D21,LTB,CENTB1,DOCK7,PLEKHG2,TIMP2,RASA4,ARHGEF11,PSD2,CENTG1,DOCK2,FGD5,ARHGEF19,VAV3,SGSM2,RAPGEF2,IQGAP1,CENTB2,TBC1D9,A430107D22RIK,GRTP1,SIPA1L2,RASA1,FGD4,GAPVD1,CSF1,C |
| GO:0000281             | -0.30937 | 0       | 0   | 18              | cytokinesis after mitosis                               | POU5F1,AIF1,DAXX,DDR1,NUSAP1,B3GALT4,ATP6V1G2,WDR46,TCF19,PHF1,TAPBP,GT2H4,LST1,LTB,MYH10,COL11A2,ZBTB9,SYNGAP1                                                                                                                                                                                                                                                                                                                                                                                                                                                                                                                                                                                                                                                                                                                                                                                                                                                                                                                                                                                                                                                             |
| GO:0030518             | -0.29106 | 0       | 0   | 75              | steroid hormone receptor signaling pathway              | PPAP2A,POU5F1,AIF1,DNAJA1,MED16,NCOA4,DAXX,MED4,DDR1,NR0B1,MED17,PPARGC1A,PMEP1A,CCNE1,CDK7,NR3C1,PPARGC1B,JMJD1A,B3GALT4,DDX54,PIAS1,KLF9,RAN,PIAS2,ATP6V1G2,WDR46,TCF19,MED24,RNF4,TAZF7,ESR2,RNF14,MED30,YWHAH,ESR1,GRIP1,CTNBNB1,PHF1,RBM9,TAPBP,GT2H4,BRCA1,LST1,MED1,JAK2,AR,PGR,IGF1,LTB,TGFB111,RBM14,CARM1,HMGA2,GHRHR,CALCOCO1,SAFB,FHL2,NRIP1,EGLN2,MED14,MED13,NCOA2,UBR5,NR3C2,COL11A2,NCOA3,THRAP3,NCOA6,ZBTB9,ARID1A,NCOA1,RB1,MED12,GH,SYNGAP1                                                                                                                                                                                                                                                                                                                                                                                                                                                                                                                                                                                                                                                                                                              |
| GO:0030072             | -0.28595 | 0       | 0   | 64              | peptide hormone secretion                               | SSTR5,TCF7L2,EIF2AK3,MC4R,GLP1R,RAPGEF4,DRD2,ANXA1,RIMS2,PSMD9,SMPD3,TRH,CAPN10,PTPN11,ENSA,OIT1,GCK,SMAD2,CAMK2G,CPLX3,GCG,CPT1A,CYB5R4,ORF9,LEP,PDE3B,NOS1,SLC30A8,VGF,EDN1,DGAT1,SNAP25,GAL,HNF1B,IL1RN,KISS1,PDX1,PPARD,JAK2,MAFA,GHRL,ACVR2B,GLUD1,HNF1A,CPLX1,GHRHR,KCNQ1,GHSR,GPR119,EDN3,TRPV4,KCNJ11,IRS1,GIP,NEUROD1,GHRH,SIRT4,STX1A,ABCC8,LTBP4,HTT,CACNA1C,MYO5A,PCLO                                                                                                                                                                                                                                                                                                                                                                                                                                                                                                                                                                                                                                                                                                                                                                                          |
| GO:0051100             | -0.26295 | 0       | 0   | 35              | negative regulation of binding                          | DNAJA3,SUMO1,EGLN1,NR0B1,NFKBIA,NLRP3,GTPBP4,MEN1,HMOX1,NARFL,FOXJ1,CEBPG,SIGIRR,PEX14,MDFI,CAT,CDKN2A,RSF1,JAK2,COMM7,HNF4A,NOD2,IRAK2,HR,SMO,ZCCHC11,FOXP3,DDIT3,THRA,ID3,TRIB1,ID2,FLNA,ZFP462,YBX2                                                                                                                                                                                                                                                                                                                                                                                                                                                                                                                                                                                                                                                                                                                                                                                                                                                                                                                                                                      |
| GO:0045913             | -0.26198 | 0       | 0   | 19              | positive regulation of carbohydrate metabolic process   | ARPP19,PPARGC1A,HIF1A,INS2,GCK,ARNT,PRKAA1,ADRA1B,MIF,IGF1,POU1F1,HNF4A,C1QTNF2,STK11,MLXIPL,DYRK2,GAPDH,S,AVPR1A,INSR                                                                                                                                                                                                                                                                                                                                                                                                                                                                                                                                                                                                                                                                                                                                                                                                                                                                                                                                                                                                                                                      |
| GO:0006338             | -0.26116 | 0       | 0   | 64              | chromatin remodeling                                    | SUPT4H2,SMARCA5,RBBP7,ASF1A,RBBP4,SUPT4H1,CBX3,ACTL6A,SMARCB1,CHRAC1,SMARCA1,INOC1,BAZ1A,MORF4L1,SIRT5,HELLS,SMARCD1,SUV39H2,SIRT3,SUV39H1,2410016O06RIK,SIRT1,MEN1,BRD7,CEBPG,SMYD1,SIRT2,TNP1,MTA2,MBD3,NA SP,TF1,CBX8,KLF1,SIRT7,SMARCC1,RSF1,SYCP3,HDAC5,HILS1,DNMT3A,HNF1A,DNMT3B,HMG20B,TAZF6,SIRT6,SUPT5H,CHD1,BAZ1B,FOXP3,NPM2,BNIP3,PBRM1,HMGA1,ARID1B,BPTF,SIRT4,SUPT6H,SMARCC2,ARID1A,RERE,BAZ2A,CHD6,SMARCA4                                                                                                                                                                                                                                                                                                                                                                                                                                                                                                                                                                                                                                                                                                                                                    |
| GO:0043388             | -0.25201 | 0       | 0   | 57              | positive regulation of DNA binding                      | PRDX3,AGT,RELA,PRKQC,NPM1,TLR3,EDA2R,UBE2V1,NME1,TLR4,JMY,PYCARD,IKBK,ITGB2,MAP3K13,EDF1,CALM2,NLRC3,TGFB1,CEBPG,EDA,BCL10,UBE2N,ABRA,CYTL1,HIPK3,CAT,NFAM1,KRAS,JAK2,SHH,CARD9,PLA2G1B,NOD2,RIPK2,MYD88,HIPK1,BRD4,IRAK2,HMGA2,TSSK4,CARD11,TICAM1,TNF,CALM1,MALT1,IKBK,CALM3,HIPK2,ERC1,CAMK2A,NCOA3,IL1B,AMH,CREBBP,ICAM1,EP300                                                                                                                                                                                                                                                                                                                                                                                                                                                                                                                                                                                                                                                                                                                                                                                                                                          |
| GO:0000226             | -0.23974 | 0       | 0   | 131             | microtubule cytoskeleton organization and biogenesis    | UXT,OFD1,BBS4,TEKT5,TUBGCP5,MID1IP1,TACC1,BBS2,TUBGCP4,SMC3,UBE2B,UBE2C,CNP,RNF19A,KIF2C,NPM1,PRKCZ,TUBGCP3,NUSAP1,KIF11,GABARAP,TPPP,PPP4C,WNT2,FBXO5,TTK,SGK1,KATNA1,TUBA8,CFTR,NEURL,MAPRE1,TUBG1,TUBGCP2,MID1,ZWINT,TEKT3,SPAG5,RAN,AP1G1,CETN3,CENPJ,KATNB1,SMC1A,RANBP9,TPX2,PRC1,1700009N14RIK,MAP6D1,SAC3D1,TEKT1,SASS6,TBCE,ASZ1,TACC3,FMN2,CKS2,PCM1,MARK1,NDEL1,CNTROB,NEFL,TEKT2,STMN3,DCTN2,AURKA,UNC84B,RANBP1,CDKN1B,CETN1,RCC1,CRYAB,MAPK8,BUB1B,BBS1,TRIM54,NDC80,ESPL1,PCNT,HOOK1,CAV3,TUBB1,ARHGEF2,BRCA1,TEKT4,CKAP5,BRCA2,CAV1,GADD45A,HDAC6,NDE1,PAFAH1B1,DOCK7,PTK2,BIRC5,KIF23,CCDC100,DYNC1L11,GTRGEO22,CAV2,TUBE1,CLASP2,TTL,PSRC1,TUBB5,NEFM,MLH1,HOOK2,CTTNBP2,TACC2,CROCC,MYH9,STMN1,HOOK3,MTAP1S,CLIP2,MTAP1A,CCDC42BPA,MAPT,APC,MTAP4,MTAP2,NEFH,MARK4,TUBGCP6,CLASP1,DST,MTAP1B,CEP250,DYNC1H1,NAV1                                                                                                                                                                                                                                                                                                                                         |

Table S3B. Gene sets down-regulated by severe stress plus morphine

| Gene Ontology category | Score    | p-value | FDR | Gene set length | Gene_set_description                              | Gene_set_genes                                                                                                                                                                                                                                                                                                                                                                                                                                                                                                                                                                                                                                                                                                                                                                                                                                                                                                                                                                                                                                                                                                                                                                      |
|------------------------|----------|---------|-----|-----------------|---------------------------------------------------|-------------------------------------------------------------------------------------------------------------------------------------------------------------------------------------------------------------------------------------------------------------------------------------------------------------------------------------------------------------------------------------------------------------------------------------------------------------------------------------------------------------------------------------------------------------------------------------------------------------------------------------------------------------------------------------------------------------------------------------------------------------------------------------------------------------------------------------------------------------------------------------------------------------------------------------------------------------------------------------------------------------------------------------------------------------------------------------------------------------------------------------------------------------------------------------|
| GO:0007507             | -0.2383  | 0       | 0   | 200             | heart development                                 | IIFT52,BMP2,CHRNA3,CBY1,ADIPOR2,PPP3R1,MNAT1,RXR8,PSEN1,MAP2K5,CALCRL,MKKS,BMPR1A,FGF12,GAA,GJA1,CITED2,CASP8,NOX4,RARB,SOX6,EGLN1,ISL1,ZIC3,FOXP1,FGFR2,ATG5,GLI3,CASP7,BMP4,ACADM,HEXIM1,TH,FGF9,SMARCD3,CENTA2,MYLPF,VANGL2,SRF,HIF1A,IDL1,SHC1,SMAD2,IRX4,TNNT2,SHOX2,PLCE1,ERBB3,NFATC3,TXNRD2,MB,HTR2B,RAF1,MAP3K7IP1,PDLIM5,TBX20,TNNI1,EPOR,TNNI3,ECE2,ITGB1,RXRA,MOSPD3,SMYD1,TGFB1,MIXL1,MESP1,CASP3,CASQ2,EDN1,MSX1,NRG1,ADRA1B,CRKL,PPP3CB,HAND2,ACTC1,CTNNB1,MYL2,MYL3,FOXC2,SLC22A5,TGFB2,SRI,MYH7,EDNRA,MYOCD,PAX3,NKX2-6,ERBB2,COL3A1,PITX2,MKL2,TRP53BP2,RB1CC1,GYS1,MED1,FOXP4,ACVR1,TSC1,PLN,SALL4,ZFPM1,GJA5,PDLIM3,SHH,ACVR2B,VCAN,ALDH1A2,GATA4,TBX5,JMJD6,FOXH1,GLI2,NFATC4,HDAC5,TAZ,NOTCH1,ERBB4,NODAL,PTEN,RBPJ,KCNJ8,TCF25,OSR1,NFATC1,ADM,PCSK5,BMP10,TBX3,HOPX,GNA11,TGFB2,OVOL2,GIC1,ADRA1A,MYLK2,TNNC1,FOXC1,MSX2,SMO,MYH6,ADRBK1,NCKAP1,POU6F1,PTPRJ,DLC1,CSR3,SEMA3C,HHEX,SOX9,NPPB,PKP2,HAND1,TEAD1,DVL2,MYH10,FGF15,DVL1,ITGA4,HDAC9,TSC2,GNAQ,NRP2,FGF8,ID3,PBRM1,ZFPM2,PRKDC,ADAM19,ENG,CXADR,SCUBE1,TBX2,FGFR1,TBX1,PKD1,MEF2C,MYH11,NKX2-5,ALPK3,NF1,INSR,TTN,NCOA6,MIB1,POFUT1,ID2,TGDF1,FBN1,MYBPC3,NRP1,XIRP1,CHD7,WNT3A,LBX1,RARA,DVL3,A |
| GO:0015833             | -0.23173 | 0       | 0   | 81              | peptide transport                                 | SSTR5,TCF7L2,EIF2AK3,MC4R,GLP1R,RAPGEF4,DRD2,ANXA1,RIMS2,PSMD9,SMPD3,TRH,CAPN10,PTPN11,ENSA,OIT1,GCK,CDH17,SMAD2,CAMK2G,RPN1,CPLX3,GCG,CPT1A,CYB5R4,ORF9,LEP,PDE3B,NOS1,SLC15A2,SLC15A4,PSMB9,TRPC4AP,SLC30A8,9830102E05RIK,NPY2R,VGF,SLCO3A1,DISP1,EDN1,SLC15A3,ABCA1,DGAT1,SNAP25,GAL,TAP1,HNF1B,IL1RN,KISS1,PDX1,PPARD,JAK2,MAFA,GHRL,ACVR2B,GLUD1,HNF1A,ABCB9,CPLX1,GHRHR,KCNQ1,GHSR,GPR119,EDN3,ADORA1,TRPV4,KCNJ11,IRS1,GIP,NEUROD1,GHRH,SLC15A1,SIRT4,STX1A,ABCC8,LTBP4,HTT,TAP2,CACNA1C,MYO5A,PCLO                                                                                                                                                                                                                                                                                                                                                                                                                                                                                                                                                                                                                                                                          |
| GO:0050852             | -0.22539 | 0       | 0   | 27              | T cell receptor signaling pathway                 | PSEN1,PTPRC,PAWR,CLEC2I,MAPK1,IKBK, FYN,UBASH3A,BCL10,UBE2N,ZAP70,PSEN2,TRAT1,PTPN22,CD3E,ELF1,TRAF6,MAP3K7,LCK,CACNB4,THY1,BCAR1,MALT1,FOXP3,CBLB,PTPN6,CACNB3                                                                                                                                                                                                                                                                                                                                                                                                                                                                                                                                                                                                                                                                                                                                                                                                                                                                                                                                                                                                                     |
| GO:0048469             | -0.22391 | 0       | 0   | 116             | cell maturation                                   | SCLT1,LGI4,PICK1,MAEA,CCNB1,AK1,FOXO3A,GJA1,EPO,SOX8,ANG,SEPT4,RPS6KA2,KCNIP2,DLD,BHLHB8,PLP1,FBXO5,MTCH1,CDKN1C,LHX6,ACTA1,SOX10,PEBP1,EREG,MYLPF,PARK2,TNNT2,PTH2R,BTK,CEBPA,MYOZ1,ITGB1,RXFP2,RND1,TMOD1,PDE3A,PTHR1,KCNH1,NEURL2,ACTC1,RUNX3,TCAP,CTNNB1,TIMP1,NTN2L,KLF1,MYL2,CALCA,IRX5,VXS1,KRT19,TSSK3,CDON,CAST,A GPAT6,IL21,APP,ERCC2,DLG2,HES1,MECP2,FOXA1,BRCA2,PGR,CBF,EPB4.2,GM767,RET,GDF11,ACTG1,KCNE1,NTN4,OBSL1,NEB,BMP10,GHRHR,KRT8,CAPN2,POU2F2,PTK2B,TCF2L1,KDR,GATA2,CAPN3,MYH6,PPARG,CLN5,DYRK1B,DLG4,MYH10,RUNX2,MYH9,FARP2,GNAQ,BCL2,CACNA1S,FGFR1,NEO1,CSPG4,MYH11,HES5,NRCAM,EPAS1,ADAM12,TTN,FZD5,INSL3,MYBPC3,IHH,XIRP1,CDC25B,KCNMA1,CACNA1H,VEGFA,AGRN                                                                                                                                                                                                                                                                                                                                                                                                                                                                                               |
| GO:0045767             | -0.22238 | 0       | 0   | 34              | regulation of anti-apoptosis                      | G6PDX,BRE,SERBP1,CDKN1A,SMAD1,SLC9A1,BCL2L1,NPM1,STAR,NPY5R,HSPD1,RTKN,HMOX1,PIK3R1,BTG2,PRKAA1,TNFAIP8,IGF1,CAV1,CD28,ERBB4,ADM,MAPK8IP2,ANGPT1,RASA1,OPA1,PTK2B,PIK3R2,PDGFRB,RTN4,ERC1,RARA,LIFR,LRP1                                                                                                                                                                                                                                                                                                                                                                                                                                                                                                                                                                                                                                                                                                                                                                                                                                                                                                                                                                            |
| GO:0051099             | -0.20702 | 0       | 0   | 61              | positive regulation of binding                    | PRDX3,AGT,EIF2AK3,RELA,AKTIP,PRKCQ,NPM1,TLR3,EDA2R,UBE2V1,NME1,TLR4,JMY,PYCARD,IKBK,ITGB2,MAP3K13,MAP1L,C3B,EDF1,CALM2,NLRC3,DPH3,TGFB1,CEBPG,EDA,BCL10,UBE2N,ABRA,CYTL1,HIPK3,CAT,NFAM1,KRAS,JAK2,SHH,CARD9,PLA2G1B,NOD2,RIPK2,MYD88,HIPK1,BRD4,IRAK2,HMGA2,TSSK4,CARD11,TICAM1,TNF,CALM1,MALT1,IKBK,CALM3,HIPK2,ERC1,CAMK2A,NCOA3,IL1B,AMH,CREBBP,ICAM1,EP300                                                                                                                                                                                                                                                                                                                                                                                                                                                                                                                                                                                                                                                                                                                                                                                                                     |
| GO:0030522             | -0.20305 | 0       | 0   | 87              | intracellular receptor-mediated signaling pathway | PPAP2A,POU5F1,AIF1,DNAJA1,MED16,NCOA4,DAXX,MED4,DDR1,NR0B1,MED17,PPARGC1A,PMPEA1,CCNE1,CDK7,NR3C1,PPARGC1B,JMJD1A,B3GALT4,DDX54,PML,PIAS1,KLF9,RAN,PIAS2,ATP6V1G2,WDR46,TCF19,MED24,CYP26B1,RNF4,TA7,NR1H2,ESR2,RNF14,MED30,PTF1A,YWHAH,ESR1,GRIP1,CTNNB1,PHF1,CREM,RBM9,TAPBP,GTAF2H4,BRCA1,FLT1,LST1,MED1,CYP26A1,JAK2,AR,PGR,IGF1,SLA2,ALDH1A2,LTB,TGFB1I1,RBM14,TGIF1,CARM1,NOS2,HMGA2,GHRHR,CALCOCO1,SAFB,FHL2,NRIP1,EGFN2,DCBLD2,MED14,MED13,NCOA2,UBR5,NR3C2,COL11A2,NCOA3,THRAP3,NCOA6,ZBTB9,ARID1A,NCOA1,RB1,MED12,GH,SYNGAP1                                                                                                                                                                                                                                                                                                                                                                                                                                                                                                                                                                                                                                              |
| GO:0043470             | -0.19957 | 0       | 0   | 15              | regulation of carbohydrate catabolic process      | ECD,HIF1A,INS2,PFKM,ARNT,HSD11B1,ADRA1B,MIF,PFKL,IGF1,PFKFB3,MLXIPL,GAPDH5,AVPR1A,INSR                                                                                                                                                                                                                                                                                                                                                                                                                                                                                                                                                                                                                                                                                                                                                                                                                                                                                                                                                                                                                                                                                              |
| GO:0007292             | -0.19889 | 0       | 0   | 66              | female gamete generation                          | AGT,PARN,CCNB1,MAGOH,ZSCAN21,FOXO3A,HEXB,DAZL,ANG,RPS6KA2,DMC1,FSHB,FBXO5,FSHR,TOB2,CBR1,EREG,MSH5,OAS1D,AFP,MSH4,FIGLA,SPO11,SIRT1,LEP,RXFP2,FMN2,DYNLL1,PDE3A,MMP2,BCL2L10,DIAP2,BMPR1B,MMP19,PLA2G4A,GLP1,BRCA2,PGR,NOS3,ERCC1,SOHLH2,STRA8,BMP15,LEPR,VMO1,NOS2,PTK2B,SOHLH1,GDF9,GNRH1,NRIP1,LEFTY2,NPM2,ADAMTS1,MLH1,AXIN1,BCL2,NOBOX,EDN2,USP9X,NANOS3,INSL3,CDC25B,WNT4,ATM,YBX2                                                                                                                                                                                                                                                                                                                                                                                                                                                                                                                                                                                                                                                                                                                                                                                            |
| GO:0051101             | -0.19436 | 0       | 0   | 94              | regulation of DNA binding                         | PRDX3,AGT,DNAJA3,SUMO1,RELA,EGLN1,PRKCQ,NPM1,TLR3,EDA2R,UBE2V1,NME1,NR0B1,TLR4,JMY,APEX1,NFKBIA,SIX6OS1,PYCARD,NLRP3,IKBK,ITGB2,MAP3K13,EDF1,MEN1,CALM2,HMOX1,NLRC3,NARF,TGFB1,FOXJ1,CEBPG,EDA,BCL10,TRAF3IP1,UBE2N,SIGIRR,ABRA,CREBZF,PEX14,CYTL1,HIPK3,MDFI,CAT,NFAM1,CDKN2A,RSF1,KRAS,JAK2,SHH,COMMD7,CARD9,HNF4A,PLA2G1B,NOD2,RUNX1T1,RIPK2,MYD88,HIPK1,BRD4,IRAK2,HMGA2,STK36,BCL3,HR,TAF6L,TSSK4,CARD11,TICAM1,TNF,CALM1,SMO,ZCCHC11,MALT1,TAF6,IKBK,FOXP3,DDIT3,CALM3,HIPK2,THRA,ID3,TRIB1,ERC1,CAMK2A,NCOA3,IL1B,ID2,FLNA,ZFP462,AMH,CREBBP,ICAM1,EP300                                                                                                                                                                                                                                                                                                                                                                                                                                                                                                                                                                                                                     |



Table S3B. Gene sets down-regulated by severe stress plus morphine

| Gene Ontology category | Score    | p-value | FDR | Gene set length | Gene_set_description                                | Gene_set_genes                                                                                                                                                                                                                                                                                                                                                                                                                                                                                                                                                                                                                                                                                                                                                                                                                                                                                                                                                                                                                                                                                                                                                                                                     |
|------------------------|----------|---------|-----|-----------------|-----------------------------------------------------|--------------------------------------------------------------------------------------------------------------------------------------------------------------------------------------------------------------------------------------------------------------------------------------------------------------------------------------------------------------------------------------------------------------------------------------------------------------------------------------------------------------------------------------------------------------------------------------------------------------------------------------------------------------------------------------------------------------------------------------------------------------------------------------------------------------------------------------------------------------------------------------------------------------------------------------------------------------------------------------------------------------------------------------------------------------------------------------------------------------------------------------------------------------------------------------------------------------------|
| GO:0030029             | -0.18398 | 0       | 0   | 314             | actin filament-based process                        | PFN4,RND3,ARHGDI1,KLHL1,AMOT,ARHGAP6,ELMO1,AIF1,MAP3K1,EPB4.1L3,PFN2,RHO,CSR1,CAP1,WASF2,ERM N,ANG,KPTN,PRKCQ,PRKCI,FHDC1,GSN,ARPC1A,S1PR1,DAXX,PRKCZ,CNN2,DDR1,CAPZB,CAPN10,PSCD2,ARPC1B,WNT2,CDC42 ,SCIN,SIRPA,CORO1C,RACGAP1,RDX,CLEC2I,FGD6,RHOA,TNFAIP1,EPB4.1,LIMA1,CAPZA3,B3GALT4,2610204M08RIK,SPNB1,DB NL,CIT,CDK5,ACTA1,CAPZA2,TPM1,SDCBP,ARPC4,RAC1,MYL7,CAPZA1,ATP6V1G2,SHROOM2,DLG1,MYL6,RPL9,NCK1,WDR46, TESK2,ROCK1,SHC1,TCF19,CF11,CAP2,RHOF,PARVA,TNNT2,ASB15,LLGL1,MYL7,VILL,CNN3,TMSB10,4933400A11RIK,BIN3,FER MT2,KCTD13,XIRP2,OPHN1,LPIN1,MYOZ1,PPP1R9A,ITGB1,PDPK1,ARHGAP8,RND1,DSTN,CRK,ASZ1,FOXJ1,TM0D1,FMN2,MYO 6,ARPC5L,PACSIN2,DYNLL1,PLEK2,ARHGAP26,RHOQ,LATS1,SVIL,ACTR3,ABI2,FGD1,MRAS,TM0D3,ABL1,DIAP2,NEURL2,MYO1 A,WIPF1,CALR,ACTN1,SHROOM4,ACTC1,CORO2B,TCAP,CXCL12,TRPM7,ATP2C1,AKAP2,ARFIP2,KISS1R,MYL2,PHF1,KRT19,WA S,ADRA2A,MYH7,RAC3,MYH4,ACTR3B,TMSB4X,CNN1,PDLIM7,TRIP10,EPB4.1L2,NEBL,TAPBP,CDC42EP2,GTTF2H4,MYH3,ARHG EF2,ARPC5,LIMCH1,ARF6,SHROOM3,CORO1A,PFN1,LST1,EHD2,NPHP1,APBB1,NCK2,KRAS,PLS3,ACTNA4,TSC1,EZR,ROCK2,CDC4 2EP5,PDLIM3,GAS7,GHRL,ARHGFE18,ARPC2,FHOD1,PLA2G1B,NRAS,DIAP3,PAFAH1B1,ARHGFE17,SORBS3,LTB,PDGFA,TTL3,W                                |
| GO:0045892             | -0.17343 | 0       | 0   | 331             | negative regulation of transcription, DNA-dependent | BHLHB3,BMP2,TCEAL1,CBY1,SIN3A,IRF2BP1,RBBP7,IRF8,SUZ12,TSG101,POU5F1,DMAP1,RBL1,SUPT4H1,AIF1,FOXP2,EPC1,ME IS2,MAF1,MBD3L1,ZFP354A,RARB,SOX2,SOX6,S100A1,VHLH,REST,DDX20,PAWR,ZKSCAN17,RNF2,LCOR,GABPA,FOXP1,FOXN3 ,TLE4,DAXX,BCOR,MBD2,DDR1,KLF12,EG237412,PKIG,SMARCE1,NR0B1,TRIM27,ZFP161,IGHMBP2,OLIG2,BMI1,SIRT5,NFKB1, HELLS,SMAD3,CDKN1C,HEXIM2,MX1,HEXIM1,1700023B02RIK,B3GALT4,MDF1,PAX5,CUX1,CBX4,DMBX1,STRAP,DRD3,E2F1, LDB1,RPS14,ATP6V1G2,YBX1,WDR46,PAZG4,ZEB1,INS2,ID1,EGR1,SMAD2,RHOX2A,TCF19,PRRX1,ILF3,JARID2,PAX2,SHOX2,GL IS1,SAP30,GZF1,SIRT3,SUV39H1,TLE1,AOF2,MXD4,DNAJB6,TBPL2,CEBPA,FGF2,SIRT1,TBX20,MEN1,RIPPLY1,E2F6,EID1,NR2F1, TRIM66,SMAD4,TRP53,ZHX1,ZBTB7A,PRDM1,NRIP2,SNF1L,FOXJ1,NOSTRIN,SIRT2,TNP1,MTA2,TRAF3IP1,NFX1,HDAC8,RYBP, EID2,DRAP1,MBD3,MSX3,PKIA,PHF12,MSX1,ZFP148,GFI1B,YWHAQ,HOXB4,SBNO2,TCF3,HMGB1,VPS72,CTNNB1,CBX8,FOX2, CTCF,SIRT7,MLX,IRF7,PEX14,HIPK3,PHF1,TDG,CBFA2T2,VAX1,NR2E1,ORC2L,MDFI,JDP2,CTBP1,OVOL1,PAX3,TAPBP,ALX1,GTTF 2H4,STAT3,PIAS4,NDUFA13,PURB,HES1,PDX1,LST1,RSF1,GLP1,FOXP4,MECP2,BARX2,PPARD,HOXA7,PGR,SALL4,ZFPM1,ING4, HOXA2,SLA2,SOX15,GSC,SIM2,NR2C1,DNMT1,MDM4,FOXH1,GLI2,SUFU,RHOX3A,HDAC5,SIX3,POU4F2,HSF4,DR1,SORBS3,LTB,        |
| GO:0045860             | -0.16246 | 0       | 0   | 196             | positive regulation of protein kinase activity      | AVP1,PPAP2A,CHRNA3,PICK1,ADRA2C,GRM1,F2R,MAP2K1IP1,GRM4,PSEN1,PDGFRC,GNB2L1,MAP2K1,CD4,PTPLAD1,MAP3K1, DRD2,PTPRC,CD81,HTR2A,DGKK,ADORA2A,TPD52L1,MAP3K4,ANG,CEACAM1,EGFR,DAXX,PRKCZ,TLR3,ERCC6,ADORA2B,TLR4, TGFA,DGKB,IL2,PRKD3,BDKRB1,MS4A2,GAB1,TIRAP,VLDLR,PTPN11,FRS2,ADRB2,DBNL,CDK5,PAK1,EREG,INS2,IKBKG,SHC1,M AP3K13,NRK,GADD45G,MAP3K2,PLCE1,TGFB3,PRLR,CARTPT,MAP3K7IP1,SOD1,FGF2,TLR1,ALS2CR2,SDC4,SYK,CRK,FCER1A,SP DYA,TRAF2,FPR1,BCL10,CCND1,PRKAA1,CD74,CXCR4,EDN1,NRG1,MDFIC,KITL,PROK1,EPGN,KISS1R,PARD3,CALCA,MAP3K5,TG FBR2,PDE6G,IGH- 6,LRRN3,ADRA2A,MAPBPIP,GNAI2,EDNRA,MDFI,AGK,CERK,ERBB2,MAP4K5,IL1RN,FLT1,EGF,KRAS,ARRB1,SPHK2,JAK2,C5AR1, ELA2,GNG3,CHRNA7,GHRL,TRAF6,ACVR2B,MAP3K7,SPAG9,DGKQ,PLA2G1B,EFNA1,TNFRSF10B,PIK3CB,MAPKB1,HCRT,CENT G1,C1QTNF2,SPDYB,TLR6,DGKD,PROK2,MAP4K1,GAP43,IRAK2,DGKI,FGD4,CAMKK1,CSF1,MAP2K3,MAP3K6,PTK2B,PRKCD,MA P3K10,TNF,EDN3,TAOK2,CERKL,ADORA1,DGKZ,MALT1,CISH,HGF,CHRM1,IRAK1,CKK,TRAF7,PDE6H,CARD14,CCDC88A,RAB26, ERN1,CARD10,PDGFB,ALS2,MADD,DGKH,CD24A,GADD45B,MUC20,EDN2,SPHK1,ADRA2B,TNFSF15,DGKE,DGKG,DAB1,MAP3K 11,CSPG4,PKN1,MAP2K6,KIT,MAPK8IP3,DGKA,BIRC7,TRP73,CCND3,INSR,MAP3K9,IL1B,TDGF1,ZEB2,CCND2,PXN,CDC25B,LRP8           |
| GO:0033674             | -0.15932 | 0       | 0   | 202             | positive regulation of kinase activity              | AVP1,PPAP2A,CHRNA3,PICK1,ADRA2C,GRM1,F2R,MAP2K1IP1,GRM4,PSEN1,PDGFRC,GNB2L1,MAP2K1,CD4,PTPLAD1,MAP3K1, DRD2,PTPRC,CD81,HTR2A,DGKK,ADORA2A,TPD52L1,MAP3K4,ANG,CEACAM1,EGFR,DAXX,PRKCZ,TLR3,ERCC6,ADORA2B,TLR4, TGFA,DGKB,CD42,IL2,PRKD3,BDKRB1,MS4A2,GAB1,TIRAP,VLDLR,PTPN11,FRS2,ADRB2,DBNL,CDK5,PAK1,EREG,RAC1,INS2,IK BKG,SHC1,MAP3K13,NRK,GADD45G,MAP3K2,PLCE1,TGFB3,PRLR,CARTPT,MAP3K7IP1,SOD1,FGF2,TLR1,ALS2CR2,SDC4,SYK,CR K,FCER1A,SPDYA,TRAF2,FPR1,BCL10,CCND1,PRKAA1,CD74,CXCR4,EDN1,NRG1,MDFIC,KITL,PROK1,EPGN,KISS1R,PARD3,CALCA ,MAP3K5,TGFBR2,PDE6G,IGH- 6,LRRN3,ADRA2A,MAPBPIP,GNAI2,EDNRA,MDFI,AGK,CERK,ERBB2,MAP4K5,IL1RN,FLT1,EGF,KRAS,ARRB1,SPHK2,JAK2,C5AR1, ELA2,GNG3,CHRNA7,GHRL,TRAF6,ACVR2B,MAP3K7,SPAG9,DGKQ,PLA2G1B,EFNA1,TNFRSF10B,PIK3CB,MAPKB1,HCRT,CENT G1,C1QTNF2,SPDYB,TLR6,VAV3,DGKD,PROK2,CLK1B4,MAP4K1,GAP43,IRAK2,DGKI,FGD4,CAMKK1,CSF1,MAP2K3,MAP3K6,PT K2B,PRKCD,MAP3K10,TNF,EDN3,TAOK2,CERKL,ADORA1,DGKZ,MALT1,CISH,HGF,CHRM1,IRAK1,CKK,TRAF7,PDE6H,IRS1,CARD 14,CCDC88A,RAB26,ERN1,CARD10,PDGFB,ALS2,MADD,DGKH,VAV2,CD24A,GADD45B,MUC20,EDN2,SPHK1,ADRA2B,TNFSF15, DGKE,DGKG,DAB1,MAP3K11,CSPG4,PKN1,MAP2K6,KIT,MAPK8IP3,DGKA,BIRC7,TRP73,CCND3,INSR,MAP3K9,IL1B,TDGF1,ZEB2 |

Table S3B. Gene sets down-regulated by severe stress plus morphine

| Gene Ontology category | Score    | p-value | FDR | Gene set length | Gene_set_description                        | Gene_set_genes                                                                                                                                                                                                                                                                                                                                                                                                                                                                                                                                                                                                                                                                                                                                                                                                                                                                                                                                                                                                                                                                                                                                                                                                                                 |
|------------------------|----------|---------|-----|-----------------|---------------------------------------------|------------------------------------------------------------------------------------------------------------------------------------------------------------------------------------------------------------------------------------------------------------------------------------------------------------------------------------------------------------------------------------------------------------------------------------------------------------------------------------------------------------------------------------------------------------------------------------------------------------------------------------------------------------------------------------------------------------------------------------------------------------------------------------------------------------------------------------------------------------------------------------------------------------------------------------------------------------------------------------------------------------------------------------------------------------------------------------------------------------------------------------------------------------------------------------------------------------------------------------------------|
| GO:0043009             | -0.15625 | 0       | 0   | 296             | chordate embryonic development              | DLL3,IFT52,BBS4,CITED1,SLC30A1,XRCC4,FUT8,TCF7L2,RBBP8,PSEN1,AMOT,PAX6,NUP50,AXIN2,PRMT1,GJA1,CITED2,PITPNB,CASP8,ZIC2,SMARCB1,MYB,EGLN1,SFRP2,SOX8,COPS3,COBL,GABPA,BCL2L1,ACVR1C,TAPT1,UBE2A,SBDS,ACVR1B,HBEGF,ZFP830,MEOX1,XRCC2,NMT1,GLI3,HOXA5,GINS1,PSMC4,BMP4,BMI1,PTCH1,SYVNI1,ACVR1,RRN3,ESRRB,APOB,AMOD1,ABI1,FGF9,GNA13,HOXB2,XAB2,GBX2,TCF7,VEZT,SOX10,TPM1,SFRP1,ACVR2A,DLG1,VANGL2,HOXC9,YBX1,SRF,HIF1A,HCN4,EN1,NBN,SMAD2,CDX2,CFL1,PRRX1,TAF8,HOXC5,TBX15,TERF2,DCPP1,AOF2,SFRS1,TGF83,PAX7,SIX4,PTK7,RIPLY2,SP1,MAP3K7IP1,DS3,CELSR1,ADAM10,CEBPA,ALKBH1,MEN1,KEAP1,RIPLY1,PSMC3,HOXB7,ITGB1,TRP53,PRDM1,GRN,GCN5L2,NCAPG2,TCFAP2A,EVI1,ZIC5,ICMT,ARNT,IFITM1,LMO4,BCL10,MBNL1,TGFB1,MAN2A1,SIX1,NDEL1,ASCL2,PCDH8,MBD3,GJB3,HOXD4,EDN1,RUNX1,PRPF19,DMBT1,MSX1,NASP,HOXB4,HAND2,MYF5,HOXB6,GATA6,HOXA6,CUBN,WNT1,GNAS,FOXC2,DNM3T3,TGFB2,HNF1B,CNMB1IP1,T,MEOX2,LIMS1,MESP2,PSEN2,PRRX2,EDNRA,HOXB9,PAX3,NKX2-6,SPINT1,ALX1,SP3,BRCA1,PTPRR,SETDB1,MKL2,SHROOM3,ERCC2,PFN1,PBX1,MED1,PAX1,MYF6,HOXB5,NKX3-2,OSR2,ACVR1,HOXA7,TBX18,BRCA2,AR,TSC1,CDC2L1,SALL4,NLE1,HOXA2,TRAF6,SHH,MAP3K7,GSC,GATA4,TBX5,GLI2,EOMES,ATP7A,NDST1,PLCG1,NODAL,HES7,RIC8,MSH2,CEBPB,TGIF1,FZD3,HNF1A,DAB2,DL1,TWIST1,PCSK5,LIG4,RPGRIP1L,MSGN1, |
| GO:0009411             | -0.15237 | 0       | 0   | 49              | response to UV                              | WRN,GPX1,CDKN1A,RELA,GTF2H2,ERCC6,ERCC5,CASP7,PML,XPA,REV1,PMAP1,ERCC4,FEN1,ERCC8,MEN1,TRP53,FECH,POLH,ERCC3,CASP3,HUS1,MAPK8,SERPINB13,CAT,CDKN2D,ERCC2,DOB2,MC1R,BRCA2,ELA2,XPC,HPAIN,ERCC1,SCARA3,MSH2,IL12B,BCL3,IVL,BRSK2,MSH6,POLD1,UACA,CASP9,HMGN1,IL12A,BCL2,BRSK1,UBE4B                                                                                                                                                                                                                                                                                                                                                                                                                                                                                                                                                                                                                                                                                                                                                                                                                                                                                                                                                              |
| GO:0048646             | -0.14926 | 0       | 0   | 289             | anatomical structure formation              | BTG1,SCYE1,C1GALT1,POU5F1,GPX1,BMPR1A,SCG2,AMOT,DLX5,SMAD1,CYR61,ANG3,ATP5B,CITED2,CASP8,SOX2,DLX6,VHLH,PLXDC1,WASF2,CD9,ATPIF1,IL18,ANG,CEACAM1,TBPL1,JAG1,S1PR1,TRIM15,FGFR2,HBEGF,CDH13,SHB,ANGPT2,CRHR2,ADORA2B,TGFA,NCL,PKNOX1,NARG1,GLI3,RORA,MEIS1,BMP4,CHN2,RNH1,CANX,PRKACA,SMAD3,ARHGAP24,ESRRB,PLG,FRS2,PML,FGF9,GNA13,CDK5,FOXO4,GBX2,ITGAV,CEP290,LDB1,NUS1,EREG,THBS2,LECT1,DDAH1,PRKAR1A,SRF,HIF1A,ID1,PF4,SOX18,SERPINE1,SHC1,ITGB2,SMAD2,ECSIT,B4GALT1,PLXND1,MTPN,FGF6,SPINK5,TXNDC8,4930525M21RIK,SP1,WNT7A,SMAD5,HOXA3,FGF2,TBX20,ANGPTL3,EXT2,DL4,HMOX1,LHX5,TWSG1,NOG,VEZF1,ELK3,PLCD3,COL18A1,APOH,HS6ST1,FABP9,STAB2,HOXA1,RHOB,AGGF1,TNFRSF12A,MIXL1,WNT3,MESP1,KNDC1,HTATIP2,HESX1,CXCR4,EDN1,RUNX1,SERPINA3C,MMP2,EMCN,HAND2,NTF5,CTNNA1,CXCL12,PROK1,EPGN,ENPEP,FOXC2,TGFB2,HNF1B,CCNB1IP1,MEOX2,CASC5,PRL7D1,APOLD1,EDNRA,PMP22,NPR1,BMP7,GATA3,MMP19,ANGPTL4,ERBB2,SP3,EGR2,ANGPTL6,PITX2,PGF,NOTCH4,SH2D2A,FLT1,EGF,ZC3H12A,TEK,COL4A3,NKX3-2,ACVR1,NLE1,TXNRD1,ERAP1,CHRNA7,GHRL,SHH,TMPRSS6,MAP3K7,KLF5,GATA4,NOS3,GLI2,EOMES,VEGFB,ATP7A,STAB1,NOTCH1,PAFAH1B1,EFNA1,PTK2,NODAL,PDGFA,KRT1,ANXA2,PTEN,RBP1,PROK2,LEPR,HNF1A,THY1,SERPINF1,IL15,ANGPT1,TBX                                                    |
| GO:0051347             | -0.14499 | 0       | 0   | 207             | positive regulation of transferase activity | AVP1,PPAP2A,CHRNA3,PICK1,ADRA2C,GRM1,F2R,MAP2K1IP1,GRM4,PSEN1,PDGFC,GNB2L1,MAP2K1,CD4,SERINC3,PTLAD1,MAP3K1,DRD2,PTPRC,CD81,HTR2A,DGKK,ADORA2A,TPD52L1,MAP3K4,ANG,CEACAM1,EGFR,DAXX,PRKCZ,TLR3,ERCC6,ADORA2B,TLR4,TGFA,SERINC1,DGKB,CDC42,IL2,PRKD3,BDKRB1,MS4A2,GAB1,TIRAP,VLDLR,PTPN11,FRS2,ADRB2,DBNL,CDK5,PAK1,EREG,RAC1,INS2,SERINC5,IKBKG,SHC1,MAP3K13,NRK,GADD45G,MAP3K2,PLCE1,TGF83,PRLR,CARTPT,MAP3K7IP1,SOD1,FGF2,TLR1,ALS2CR2,SDC4,SYK,CRK,FCER1A,SPDYA,TRAF2,FPR1,BCL10,CCND1,PRKAA1,CD74,SERINC2,CXCR4,EDN1,NRG1,MDFIC,KITL,PROK1,EPGN,KISS1R,PAR3,CALCA,MAP3K5,TGFB2,PDE6G,IGH-6,LRRN3,ADRA2A,MAPBP1,GNAI2,EDNRA,MDF1,AGK,CERK,ERBB2,MAP4K5,IL1RN,FLT1,EGF,KRAS,ARRB1,SPHK2,JAK2,C5AR1,ELA2,GNG3,CHRNA7,GHRL,TRAF6,APOA1,ACVR2B,MAP3K7,SPAG9,DGKQ,PLA2G1B,EFNA1,TNFRSF10B,PIK3CB,MAPKB1,HCR,T,CENTG1,C1QTNF2,SPDYB,TLR6,VAV3,DGKD,PROK2,KLK1B4,MAP4K1,GAP43,IRAK2,DGKI,FGD4,CAMKK1,CSF1,MAP2K3,MAP3K6,PTK2B,PRKCD,MAP3K10,TNF,EDN3,TAOK2,CERKL,ADORA1,DGKZ,MALT1,CISH,HGF,CHRM1,IRAK1,CCK,TRAF7,PDE6H,IRS1,CARD14,CCDC88A,RAB26,ERN1,CARD10,PDGFB,ALS2,MADD,DGKH,VAV2,CD24A,GADD45B,MUC20,EDN2,SPHK1,ADRA2B,TNFSF15,DGKE,DGKG,DAB1,MAP3K11,CSPG4,PKN1,MAP2K6,KIT,MAPK8IP3,DGKA,BIRC7,TRP73,CCND3,INSR,MAP3K9,IL1B,TGFB           |
| GO:0007517             | -0.14033 | 0       | 0   | 273             | muscle development                          | EZH2,BTG1,ACHE,CBY1,RXR2,F2R,TCF7L2,SGCE,GPX1,GPHN,MORF4L2,CHODL,RXR2,GAA,EMD,FOX2,EPC1,GJA1,FXR1,RARB,CSR2,SOX6,AFG3L2,RCAN1,CACNA2D2,MUSK,SNTA1,JAG1,FOX1,CXCL10,TAGLN2,HBEGF,FKTN,ATG5,BMP4,TAGLN,ACADM,CSF1R,SMAD3,RHOA,NR2F2,PLG,COL4A4,KY,ADRB2,CDK5,FOXO4,ACTA1,SGCA,MSTN,PAK1,MYLPF,ANKRD2,CACNG2,MYL6,MTM1,SRF,HIF1A,ITGB1BP3,CACNB2,TNNT2,CTF1,TCF12,MTPN,ERBB3,EVC,MEF2D,HIST1H1B,DOK7,PAX7,SGCD,SIX4,FGF6,4930525M21RIK,IGFBP5,LGALS1,SOD1,MEF2B,SIRT1,DTNBP1,TNNI1,P2RX2,MYO21,TNNI3,ITGB1,RXRA,TGFB1,PK3R1,TMOD1,SRPK3,SIRT2,CENPF,MBNL1,SIX1,KCNH1,UBB,EID2,FHL1,ACTG2,SVIL,SGCB,DES,NGFR,MRAS,MSX1,NRG1,DNER,NEURL2,PPP3CB,MYF5,CRYAB,SGCG,RPS6KB1,ACTC1,GATA6,TCAP,CTNNA1,NTN2L,LRP4,UNC45B,CHAT,MYL2,MYL3,CALCA,MYEF2,FOXC2,TAGLN3,SRI,KRT19,MEOX2,MYH7,CDON,CAV3,CAST,MYOCD,PAX3,PPP3CA,ERBB2,APP,MYH3,MYL9,PITX2,HSPB2,KREMEN1,MKL2,CHRNA1,UTRN,MYF6,KRAS,BARX2,ACVR1,TSC1,MBNL3,PLN,IGF1,PDLM3,METTL8,SHH,SOX15,CAV1,GSC,BOC,MEF2A,IGSF8,BDNF,NRAS,HDAC5,TAZ,NOTCH1,COL5A3,PTEN,NRD1,ELN,DMD,FOX2,TCF23,ACTG1,CACNB4,MKX,TWIST1,OBSL1,MOV10L1,VAMP5,NEB,BMP10,ITGB1BP2,MYOM2,PITX1,TBX3,HOPX,IFRD1,KRT8,CAPN2,MTSS1,CAV2,GJC1,MYOG,MYLK2,TNNC1,FOXC1                                                                      |

Table S3B. Gene sets down-regulated by severe stress plus morphine

| Gene Ontology category | Score    | p-value | FDR | Gene set length | Gene_set_description                  | Gene_set_genes                                                                                                                                                                                                                                                                                                                                                                                                                                                                                                                                                                                                                                                                                                                                                                                                                                                                                                                                                                                                                                                                                                                                                                                                                                                                 |
|------------------------|----------|---------|-----|-----------------|---------------------------------------|--------------------------------------------------------------------------------------------------------------------------------------------------------------------------------------------------------------------------------------------------------------------------------------------------------------------------------------------------------------------------------------------------------------------------------------------------------------------------------------------------------------------------------------------------------------------------------------------------------------------------------------------------------------------------------------------------------------------------------------------------------------------------------------------------------------------------------------------------------------------------------------------------------------------------------------------------------------------------------------------------------------------------------------------------------------------------------------------------------------------------------------------------------------------------------------------------------------------------------------------------------------------------------|
| GO:0045859             | -0.12891 | 0       | 0   | 303             | regulation of protein kinase activity | AVPI1,BCCIP,PPAP2A,CHRNA3,PICK1,MNAT1,ADRA2C,GPS1,GRM1,F2R,MAP2K1IP1,GRM4,PSEN1,PDGFC,RGS4,GNB2L1,PPP2CA,CDKN1A,MAP2K1,CD4,CDKN2C,PTPLAD1,MAP3K1,DRD2,PTPRC,CD81,HTR2A,DGKK,PRKRIP1,ADORA2A,CDC6,TPD52L1,MAP3K4,ANG,CEACAM1,EGFR,CDC37,DAXX,PRKCZ,TLR3,DRD1A,GTF2H1,PKIG,ERCC6,CDC25C,DUSP16,ADORA2B,TLR4,TGFA,DGKB,CDK7,IL2,PRKD3,BDKRB1,CHEK1,MS4A2,GAB1,CCNE2,CDKN1C,HEXIM2,HEXIM1,TIRAP,PCDC4,SPRED1,VLDLR,PTPN11,FRS2,ADRDB2,DBNL,CDK5,FABP4,PAK1,EREG,CDK5RAP3,INS2,APLP2,IKBK,SHC1,SNX6,MAP3K13,NRK,GADD45G,NUP62,GTPBP4,MAP3K2,TARBP2,PAK2,DUSP22,PLCE1,CDK5R1,TGFB3,PRLR,CARTPT,MAP3K7IP1,KNG1,SOD1,FGF2,CCNT1,MEN1,TLR1,LAX1,ALS2CR2,TRIB2,HERC5,SDC4,ANAPC2,SYK,CRK,FCER1A,SPDYA,CKS2,TRAF2,FPR1,BCL10,APOE,CCND1,PRKAA1,LATS1,DUSP2,CASP3,CD74,PKIA,CXCR4,EDN1,NRG1,BLM,CDKN1B,MDFIC,MBIP,KITL,PROK1,EPGN,KISS1R,CDKN3,DRD5,PARD3,CALCA,HIPK3,MAP3K5,TGFBR2,PDE6G,IGH-6,LRRN3,CDKN2B,ADRA2A,MAPBPPIP,PSEN2,PKIB,GNAI2,EDNRA,MDFI,CAV3,AGK,CERK,ERBB2,MAP4K5,APP,DUSP8,CDKN2D,SSERTAD1,IL1RN,FLT1,EGF,CDKN2A,CKS1B,NCK2,KRAS,ARRB1,SPHK2,PPP2R1A,JAK2,GPS2,C5AR1,TSC1,ELA2,DUSP9,GNG3,CHRNA7,GHRL,TRAF6,ACVR2B,CAV1,GADD45A,MAP3K7,RGS3,SPAG9,DGKQ,PLA2G1B,SPRY1,EFNA1,TNFRSF10B,PIK3CB,MAPKB1                                                                      |
| GO:0051098             | -0.1271  | 0       | 0   | 120             | regulation of binding                 | PRDX3,AGT,PCBD1,EIF2AK3,PSEN1,DNAJA3,SUMO1,RELA,EGLN1,PRMT8,AKTIP,PRKCO,NPM1,TLR3,EDA2R,UBE2V1,NME1,NR0B1,TLR4,JMY,SMAD3,LDLRAP1,APEX1,NFKBIA,ADRB2,SMARCD3,SIX6OS1,PYCARD,NLRP3,IKBK,ITGB2,SMAD2,MAP3K13,MAP1LC3B,GTPBP4,EDF1,MEN1,CALM2,HMOX1,NLRC3,DPH3,SMAD4,NARFL,TGFB1,FOXJ1,BAX,CEBPG,EDA,BCL10,TRAF3IP1,ATR,UBE2N,SIGIRR,TGFBR3,NRG1,ABRA,BLM,PRMT7,CREBZF,ARRB2,PEX14,CYTL1,HIPK3,MDFI,ADRB3,CAT,NFAM1,CDKN2A,RSF1,KRAS,ARRB1,JAK2,SHH,COMMD7,CARD9,HNF4A,PLA2G1B,NOD2,RUNX1T1,RIPK2,MYD88,HIPK1,BRD4,IRAK2,HMGA2,STK36,BCL3,HR,TAF6L,TSSK4,CARD11,TICAM1,TNF,CALM1,BAK1,SMO,ZCCHC11,MALT1,TAF6,IKBK,FOXPP3,DDIT3,CALM3,HIPK2,THRA,JD3,BCL2,TRIB1,ERC1,CAMK2A,NCOA3,IL1B,ID2,FLNA,ZFP462,AMH,CREBBP,YBX2,ICAM1,EP300                                                                                                                                                                                                                                                                                                                                                                                                                                                                                                                                                  |
| GO:0051338             | -0.11236 | 0       | 0   | 320             | regulation of transferase activity    | AVPI1,BCCIP,PPAP2A,CHRNA3,PICK1,MNAT1,ADRA2C,GPS1,GRM1,F2R,MAP2K1IP1,GRM4,PSEN1,PDGFC,RGS4,GNB2L1,PPP2CA,RBL1,CDKN1A,MAP2K1,CD4,SERINC3,CDKN2C,PTPLAD1,MAP3K1,DRD2,PTPRC,CD81,CLN8,HTR2A,DGKK,PRKRIP1,ADORA2A,CDC6,TPD52L1,MAP3K4,ANG,CEACAM1,EGFR,CDC37,DAXX,PRKCZ,TLR3,DRD1A,GTF2H1,PKIG,ERCC6,CDC25C,DUSP16,ADORA2B,TLR4,TGFA,SERINC1,DGKB,CDC42,CDK7,IL2,PRKD3,BDKRB1,CHEK1,MS4A2,GAB1,CCNE2,CDKN1C,HEXIM2,HEXIM1,TIRAP,PCDC4,SPRED1,VLDLR,PTPN11,FRS2,ADRB2,DBNL,CDK5,FABP4,PAK1,EREG,RAC1,CDK5RAP3,INS2,SERINC5,APLP2,OAS1D,IKBK,SHC1,SNX6,MAP3K13,NRK,GADD45G,NUP62,RBL2,GTPBP4,MAP3K2,TARBP2,PAK2,DUSP22,PLCE1,CDK5R1,TGFB3,PRLR,CARTPT,MAP3K7IP1,KNG1,SOD1,FGF2,CCNT1,MEN1,TLR1,LAX1,ALS2CR2,TRIB2,HERC5,SDC4,ANAPC2,SYK,CRK,FCER1A,SPDYA,CKS2,TRAF2,FPR1,BCL10,APOE,CCND1,PRKAA1,LATS1,DUSP2,CASP3,CD74,PKIA,SERINC2,CXCR4,EDN1,NRG1,BLM,CDKN1B,MDFIC,MBIP,KITL,PROK1,EPGN,KISS1R,CDKN3,DRD5,PARD3,CALCA,HIPK3,MAP3K5,TGFBR2,PDE6G,IGH-6,LRRN3,CDKN2B,ADRA2A,MAPBPPIP,PSEN2,PKIB,GNAI2,EDNRA,MDFI,CAV3,AGK,CERK,ERBB2,MAP4K5,APP,DUSP8,CDKN2D,SSERTAD1,IL1RN,FLT1,EGF,CDKN2A,CKS1B,NCK2,KRAS,ARRB1,SPHK2,PPP2R1A,JAK2,GPS2,C5AR1,TSC1,ELA2,DUSP9,GNG3,CHRNA7,GHRL,TRAF6,APOA1,ACVR2B,CAV1,GADD45A,MAP3K7,RGS3,SPAG9,DGKQ,PLA2G1B,SPRY1,EFNA1,TNFRSF10B,PIK3CB,MAPKB1 |

**Table S4A - Micortubule bundle formation**

| <b>Gene</b> | <b>Score</b> |
|-------------|--------------|
| OFD1        | 1.996056396  |
| BBS2        | 1.233417218  |
| UBE2B       | 1.125578851  |
| TPPP        | 0.874182947  |
| NEURL       | 0.773212169  |
| GTRGEO22    | -0.097471853 |
| PSRC1       | -0.214113372 |
| MTAP1S      | -0.541792902 |
| MTAP2       | -0.788067588 |
| MARK4       | -1.111905458 |
| CLASP1      | -1.171900632 |
| MTAP1B      | -1.32341063  |
| NAV1        | -2.128027623 |

**Table S4B - Dendrite development**

| <b>Gene</b> | <b>Score</b> |
|-------------|--------------|
| MCF2        | 2.316665     |
| BBS4        | 1.764101     |
| ACHE        | 1.641147     |
| CHRNA3      | 1.601749     |
| KLHL1       | 1.241991     |
| SMAD1       | 1.198219     |
| IGSF9       | 1.195423     |
| CHRNA2      | 1.109888     |
| HPRT1       | 1.028005     |
| LZTS1       | 1.000817     |
| TRAPPC4     | 0.971036     |
| PSCD2       | 0.889905     |
| SGK1        | 0.815338     |
| RHOA        | 0.774777     |
| CIT         | 0.70722      |
| CDK5        | 0.7038       |
| PAK1        | 0.670184     |
| RAC1        | 0.667283     |
| NTRK2       | 0.633381     |
| CACNA1F     | 0.468849     |
| MYO6        | 0.43411      |
| KNDC1       | 0.382429     |
| ABI2        | 0.370328     |
| YWHAH       | 0.344921     |
| CHAT        | 0.302209     |
| BBS1        | 0.283321     |
| SCARF1      | 0.259185     |
| MT3         | 0.247251     |
| APP         | 0.196735     |
| ARF6        | 0.191648     |
| LST1        | 0.168843     |
| MECP2       | 0.152421     |
| GHRL        | 0.109317     |
| DCLK1       | 0.098058     |
| BDNF        | 0.081723     |
| ATP7A       | 0.068714     |
| SS18L1      | -0.0619      |
| PRKG1       | -0.25818     |
| TLX2        | -0.27854     |
| DVL1        | -0.35319     |
| PPP1R9B     | -0.45545     |
| PTPRF       | -0.4975      |
| FEZF2       | -0.50171     |
| GRIN3A      | -0.50956     |
| DBN1        | -0.58584     |
| DCX         | -0.72881     |
| SIPA1L1     | -0.73202     |
| MTAP2       | -0.78807     |
| NRP1        | -0.82315     |
| KALRN       | -1.14862     |
| CACNA1A     | -1.22864     |
| KLF7        | -1.27791     |
| MTAP1B      | -1.32341     |
| CELSR2      | -1.51836     |
| SYNGAP1     | -1.59457     |

**Table S4C - Regulation of axonogenesis**

| <b>Gene</b> | <b>Score</b> |
|-------------|--------------|
| ACHE        | 1.641147012  |
| SPP1        | 1.380656466  |
| PSEN1       | 1.306903405  |
| SEMA4D      | 1.15949539   |
| CDH4        | 0.99509717   |
| SEMA3A      | 0.988911871  |
| NTN1        | 0.921794031  |
| SEMA3F      | 0.886683341  |
| MBP         | 0.883054004  |
| PLXNB2      | 0.834097522  |
| RNF6        | 0.796040426  |
| LRRC4C      | 0.573494476  |
| ROBO2       | 0.558065285  |
| POU3F2      | 0.52763915   |
| WNT7A       | 0.518874108  |
| RUFY3       | 0.490270984  |
| APOE        | 0.417534987  |
| TNFRSF12A   | 0.407960485  |
| NEFL        | 0.367509825  |
| BARHL2      | 0.359643048  |
| PLXNB1      | 0.261920795  |
| ULK2        | 0.261141994  |
| MIF         | 0.146005957  |
| EFNA1       | 0.054075306  |
| PTK2        | 0.049376833  |
| THY1        | -0.012919509 |
| CDH2        | -0.068403515 |
| LIMK1       | -0.162577386 |
| AMIGO1      | -0.164930427 |
| TTL         | -0.197500532 |
| NEFM        | -0.250878699 |
| METRNL      | -0.255729546 |
| RTN4R       | -0.276350039 |
| DPYSL2      | -0.325979231 |
| ULK1        | -0.380644085 |
| TIAM1       | -0.432371467 |
| SEMA4F      | -0.433810793 |
| RTN4        | -0.448608378 |
| KLK8        | -0.539458722 |
| CSPG4       | -0.557178817 |
| MAPT        | -0.621722674 |
| NRCAM       | -0.639936933 |
| NGF         | -0.711203576 |
| EPHB2       | -0.763462382 |
| ROBO1       | -0.790316202 |
| NRP1        | -0.823145385 |
| SLIT2       | -0.928315056 |
| NTRK3       | -1.162799683 |
| CACNA1A     | -1.228640639 |
| PLXNA3      | -1.27355713  |
| SYNGAP1     | -1.594571863 |

**Table S5A - Aerobic respiration**

| <b>Gene</b>   | <b>Score</b> |
|---------------|--------------|
| POLR3H        | 2.979493079  |
| PDHB          | 2.766343743  |
| SUCLA2        | 1.575066443  |
| SUCLG1        | 1.550458589  |
| MDH1          | 1.544756007  |
| ME3           | 1.454191795  |
| UQCRB         | 1.326788885  |
| OXA1L         | 1.306376066  |
| FH1           | 1.257399593  |
| ADSL          | 1.212541301  |
| UQCRC1        | 1.13657849   |
| UQCRH         | 1.131904216  |
| SLC25A14      | 1.11330701   |
| ATP5G3        | 1.112117509  |
| IDH3B         | 1.089403069  |
| UQCRC2        | 1.018920115  |
| ACO2          | 1.015636151  |
| SDHA          | 0.942093473  |
| SUCLG2        | 0.935235924  |
| SDHD          | 0.895610294  |
| SDHB          | 0.882441321  |
| MDH1B         | 0.835804964  |
| SDHC          | 0.739816814  |
| IDH3A         | 0.70710883   |
| IDH3G         | 0.701619123  |
| IDH2          | 0.687573659  |
| SURF1         | 0.530667089  |
| DLST          | 0.42169367   |
| NNT           | 0.415837543  |
| CS            | 0.40631418   |
| MDH2          | 0.227294699  |
| CAT           | 0.195949555  |
| COX1          | 0.09218332   |
| IDH1          | 0.006997654  |
| ACO1          | -0.054939436 |
| COX10         | -0.210097949 |
| 2610507B11RIK | -0.288809549 |
| FXN           | -0.299712072 |

**Table S5B - Cellular response to stress**

| Gene     | Score     |
|----------|-----------|
| ASNS     | 1.458821  |
| EIF2AK3  | 1.338014  |
| PSEN1    | 1.306903  |
| CLN3     | 1.123042  |
| ATG16L1  | 1.013702  |
| EIF2B1   | 1.013152  |
| EIF2B3   | 0.996263  |
| EIF2B4   | 0.974435  |
| KRT20    | 0.9121    |
| ATG4C    | 0.87095   |
| PPP1R15B | 0.860007  |
| ATG5     | 0.855805  |
| EIF2S1   | 0.843436  |
| ATG4D    | 0.823277  |
| WFS1     | 0.793309  |
| ATG12    | 0.753368  |
| ATG4B    | 0.7439    |
| EIF2B5   | 0.743763  |
| SREBF1   | 0.684621  |
| CTSD     | 0.674239  |
| EIF2AK4  | 0.652226  |
| HIF1A    | 0.633127  |
| INS2     | 0.627863  |
| BECN1    | 0.569986  |
| PCSK9    | 0.563132  |
| ALB      | 0.553017  |
| CARTPT   | 0.529563  |
| HMOX1    | 0.486094  |
| TRP53    | 0.468827  |
| MAP1LC3A | 0.461529  |
| HFE      | 0.458487  |
| GLRX2    | 0.440041  |
| ARNT     | 0.422939  |
| ATG10    | 0.422446  |
| HSPA5    | 0.422116  |
| ATG9A    | 0.286624  |
| FADS1    | 0.257263  |
| NPC1     | 0.221727  |
| ANGPTL4  | 0.209596  |
| PRKCD    | -0.107848 |
| JUN      | -0.11344  |
| ATG4A    | -0.219351 |
| DDIT3    | -0.237319 |
| HRK      | -0.335333 |
| NUAK2    | -0.383939 |
| FOXA3    | -0.453937 |
| FRAP1    | -0.454252 |
| ATG9B    | -0.512136 |
| AVPR1A   | -0.630101 |
| EPAS1    | -0.651735 |
| GSK3B    | -0.830722 |



**Table S5C - ATP synthesis coupled electra**

| <b>Gene</b> | <b>Score</b> |
|-------------|--------------|
| NDUFS6      | 2.094409     |
| NDUFB4      | 1.859132     |
| NDUFB5      | 1.691591     |
| NDUFS5      | 1.558792     |
| NDUFA1      | 1.549671     |
| NDUFAB1     | 1.373993     |
| UQCRB       | 1.326789     |
| NDUFS2      | 1.27106      |
| NDUFA9      | 1.244848     |
| NDUFS3      | 1.193021     |
| NDUFA2      | 1.182373     |
| NDUFB6      | 1.179208     |
| NDUFA8      | 1.140837     |
| NDUFA7      | 1.133453     |
| UQCRH       | 1.131904     |
| NDUFA5      | 1.116749     |
| NDUFC1      | 1.098126     |
| NDUFB2      | 1.097799     |
| NDUFB8      | 1.092862     |
| NDUFS1      | 1.087287     |
| NDUFS4      | 1.07959      |
| UQCR        | 1.05645      |
| NDUFB9      | 1.056366     |
| NDUFB3      | 1.042503     |
| NDUFA10     | 1.040563     |
| NDUFB7      | 1.037141     |
| NDUFS7      | 1.019619     |
| NDUFV1      | 0.989429     |
| NDUFC2      | 0.957655     |
| NDUFA4      | 0.935808     |
| NDUFV2      | 0.914707     |
| DLD         | 0.86863      |
| COX15       | 0.777085     |
| NDUFA3      | 0.740542     |
| NDUFAF1     | 0.737211     |
| NDUFS8      | 0.701252     |
| NDUFB10     | 0.627861     |
| NDUFA6      | 0.607404     |
| ND3         | 0.429802     |
| 15RIK       | 0.390586     |
| ND1         | 0.311259     |
| ND5         | 0.13161      |
| COX2        | 0.120325     |
| COX1        | 0.092183     |
| BDNF        | 0.081723     |
| TAZ         | 0.065839     |
| ND4L        | 0.054199     |
| ND6         | -0.108924    |
| COX10       | -0.210098    |
| COX8B       | -0.313986    |
